# Supplementary material for: Deciphering allosterism of an Escherichia coli hexuronate metabolism regulator: UxuR
Source: Royal Society of Chemistry journal article supplement (doi:10.1039/d5md00391a), 2025-01-01
Supplement: d5md00391a1.xlsx [file d5md00391a1.xlsx]

## Sheet: UxuR free from
#Acceptor	DonorH	Donor	Frames	Frac	AvgDist	AvgAng
GLN_361@O	SER_365@HG	SER_365@OG	4430733	0.9328	2.7004	162.022
GLN_103@O	SER_107@HG	SER_107@OG	4401303	0.9266	2.7078	162.142
ARG_360@O	GLU_364@H	GLU_364@N	4131266	0.8697	2.8224	156.931
LEU_104@O	ASN_108@HD22	ASN_108@ND2	4089836	0.861	2.8153	161.595
LEU_362@O	ASN_366@HD22	ASN_366@ND2	4082837	0.8595	2.8145	161.599
ALA_414@O	THR_417@HG1	THR_417@OG1	4075860	0.8581	2.7531	163.747
MET_149@O	LEU_153@H	LEU_153@N	3994623	0.841	2.8343	159.465
ARG_102@O	GLU_106@H	GLU_106@N	3976830	0.8372	2.8296	156.018
MET_407@O	LEU_411@H	LEU_411@N	3909983	0.8232	2.8399	159.286
LEU_411@O	GLU_415@H	GLU_415@N	3892006	0.8194	2.8525	164.401
ILE_109@O	ALA_113@H	ALA_113@N	3819299	0.8041	2.8432	160.245
LEU_153@O	GLU_157@H	GLU_157@N	3816998	0.8036	2.8545	164.187
LEU_279@O	THR_283@HG1	THR_283@OG1	3670093	0.7727	2.744	162.323
ILE_367@O	ALA_371@H	ALA_371@N	3667169	0.772	2.8454	159.062
LEU_476@O	GLN_480@H	GLN_480@N	3622112	0.7625	2.8567	162.284
ILE_71@O	LEU_33@H	LEU_33@N	3609632	0.7599	2.8441	160.621
ILE_329@O	LEU_291@H	LEU_291@N	3598236	0.7575	2.848	161.613
ALA_156@O	THR_159@HG1	THR_159@OG1	3567375	0.751	2.7555	163.899
LEU_98@O	ARG_102@H	ARG_102@N	3470847	0.7307	2.8592	161.614
GLU_424@O	GLN_428@H	GLN_428@N	3466789	0.7298	2.8503	159.576
LEU_218@O	GLN_222@H	GLN_222@N	3465138	0.7295	2.862	162.408
GLU_483@O	GLN_487@H	GLN_487@N	3341481	0.7035	2.8554	161.211
GLU_97@O	ASN_419@HD21	ASN_419@ND2	3330613	0.7012	2.849	157.877
LEU_356@O	ARG_360@H	ARG_360@N	3329360	0.7009	2.8685	161.758
LEU_21@O	THR_25@HG1	THR_25@OG1	3327605	0.7005	2.7422	162.558
ASP_458@O	ILE_462@H	ILE_462@N	3320195	0.699	2.8631	161.113
VAL_423@O	ARG_427@H	ARG_427@N	3288787	0.6924	2.8606	160.465
VAL_165@O	ARG_169@H	ARG_169@N	3264393	0.6872	2.8567	159.782
TYR_330@O	GLU_322@H	GLU_322@N	3254104	0.6851	2.8568	159.203
ASP_200@O	ILE_204@H	ILE_204@N	3244372	0.683	2.8648	160.876
LEU_357@O	GLN_361@H	GLN_361@N	3231863	0.6804	2.8517	155.044
LYS_217@O	TRP_221@H	TRP_221@N	3194899	0.6726	2.8715	160.872
LYS_475@O	TRP_479@H	TRP_479@N	3166610	0.6667	2.8724	160.697
GLU_355@O	ASN_161@HD21	ASN_161@ND2	3134729	0.6599	2.8564	160.119
LEU_99@O	GLN_103@H	GLN_103@N	3128995	0.6587	2.8542	155.73
LEU_463@O	ILE_467@H	ILE_467@N	3067264	0.6457	2.873	159.404
VAL_123@O	GLN_127@H	GLN_127@N	3048868	0.6419	2.8658	160.155
VAL_381@O	GLN_385@H	GLN_385@N	3042444	0.6405	2.8677	160.579
GLU_225@O	GLN_229@H	GLN_229@N	3027277	0.6373	2.863	160.387
ILE_122@O	ARG_126@H	ARG_126@N	3024975	0.6368	2.8699	159.348
LEU_205@O	ILE_209@H	ILE_209@N	3014859	0.6347	2.8747	159.531
VAL_50@O	LEU_54@H	LEU_54@N	2997046	0.631	2.8761	158.339
LEU_231@O	SER_235@HG	SER_235@OG	2990536	0.6296	2.754	162.799
VAL_308@O	LEU_312@H	LEU_312@N	2975401	0.6264	2.8751	158.028
ALA_473@O	ALA_477@H	ALA_477@N	2966447	0.6245	2.8685	161.843
ARG_47@O	ARG_51@H	ARG_51@N	2948935	0.6208	2.8687	160.449
GLY_273@O	ARG_277@H	ARG_277@N	2939181	0.6188	2.8649	158.462
ARG_305@O	ARG_309@H	ARG_309@N	2932451	0.6174	2.8691	159.992
GLU_166@O	GLN_170@H	GLN_170@N	2915898	0.6139	2.8494	158.738
LEU_315@O	LEU_320@H	LEU_320@N	2901942	0.6109	2.8695	157.18
ILE_380@O	ARG_384@H	ARG_384@N	2890421	0.6085	2.8743	159.662
ALA_215@O	ALA_219@H	ALA_219@N	2873641	0.605	2.8708	161.954
ALA_207@O	ASP_212@H	ASP_212@N	2869984	0.6042	2.8682	158.53
AP1_406@O	HD1_410@H	HD1_410@N	2868629	0.6039	2.8719	164.136
ALA_219@O	HD3_223@H	HD3_223@N	2839503	0.5978	2.8629	155.617
ALA_371@O	ALA_375@H	ALA_375@N	2818421	0.5934	2.8606	156.221
ILE_182@O	SER_186@HG	SER_186@OG	2811195	0.5918	2.7516	162.502
GLU_64@O	TYR_72@H	TYR_72@N	2802635	0.59	2.8654	161.198
PHE_354@O	GLN_358@H	GLN_358@N	2787134	0.5868	2.8752	157.22
ALA_113@O	ALA_117@H	ALA_117@N	2776342	0.5845	2.8663	156.971
LEU_198@O	LYS_202@H	LYS_202@N	2772491	0.5837	2.8747	157.794
ALA_477@O	HD3_481@H	HD3_481@N	2767471	0.5826	2.8619	154.922
GLN_116@OE1	HIE_160@H	HIE_160@N	2755286	0.5801	2.8441	160.179
VAL_14@O	ILE_18@H	ILE_18@N	2750469	0.579	2.8755	157.048
GLN_428@O	TRP_432@H	TRP_432@N	2743297	0.5775	2.8726	159.37
ASP_379@O	MET_383@H	MET_383@N	2739657	0.5768	2.8766	159.075
ASP_121@O	MET_125@H	MET_125@N	2730377	0.5748	2.8755	159.34
GLU_364@O	ALA_368@H	ALA_368@N	2725381	0.5738	2.8815	159.784
ALA_465@O	ASP_470@H	ASP_470@N	2711392	0.5708	2.8715	158.986
LEU_57@O	LEU_62@H	LEU_62@N	2709966	0.5705	2.8742	156.385
TYR_269@O	GLY_273@H	GLY_273@N	2707310	0.57	2.8582	154.319
GLU_106@O	ALA_110@H	ALA_110@N	2707127	0.5699	2.8798	158.625
TYR_72@O	GLU_64@H	GLU_64@N	2706062	0.5697	2.8633	157.703
GLU_106@OE1	HD1_152@HD1	HD1_152@ND1	2694553	0.5673	2.7393	158.617
ARG_169@O	GLN_173@H	GLN_173@N	2682609	0.5648	2.8622	157.401
GLY_405@O	PHE_409@H	PHE_409@N	2675339	0.5632	2.865	155.982
GLU_36@O	ALA_40@H	ALA_40@N	2671383	0.5624	2.874	160.105
TRP_197@O	HD2_201@H	HD2_201@N	2662629	0.5606	2.877	161.797
LEU_62@O	LEU_74@H	LEU_74@N	2646557	0.5572	2.8623	159.523
LYS_202@O	ALA_206@H	ALA_206@N	2631509	0.554	2.8749	158.538
ARG_427@O	GLN_431@H	GLN_431@N	2630630	0.5538	2.8721	160.514
GLU_106@OE2	ARG_102@HE	ARG_102@NE	2628327	0.5533	2.7867	163.298
TRP_221@O	GLU_225@H	GLU_225@N	2622196	0.552	2.8729	154.46
AP1_148@O	HD1_152@H	HD1_152@N	2605864	0.5486	2.8739	163.778
GLY_15@O	ARG_19@H	ARG_19@N	2603608	0.5481	2.8737	159.323
ASN_419@OD1	LEU_422@H	LEU_422@N	2576749	0.5425	2.866	155.277
LEU_456@O	LYS_460@H	LYS_460@N	2559487	0.5388	2.8768	158.223
PHE_96@O	GLN_100@H	GLN_100@N	2551701	0.5372	2.8744	157.778
TYR_11@O	GLY_15@H	GLY_15@N	2547399	0.5363	2.8606	152.711
GLU_294@O	ALA_298@H	ALA_298@N	2546774	0.5362	2.8777	160.279
VAL_272@O	ILE_276@H	ILE_276@N	2543754	0.5355	2.8768	156.228
GLY_147@O	PHE_151@H	PHE_151@N	2509669	0.5284	2.8728	156.626
ASP_470@O	ALA_474@H	ALA_474@N	2500833	0.5265	2.8886	161.488
GLU_106@OE1	ARG_102@HH21	ARG_102@NH2	2498527	0.526	2.8114	160.7
TRP_479@O	GLU_483@H	GLU_483@N	2487657	0.5237	2.8772	153.706
ARG_452@O	LEU_456@H	LEU_456@N	2475607	0.5212	2.871	157.29
ALA_311@O	LEU_315@H	LEU_315@N	2465261	0.519	2.8788	159.565
GLN_480@O	ASN_484@H	ASN_484@N	2461529	0.5182	2.8701	155.391
MET_421@O	LEU_425@H	LEU_425@N	2456051	0.5171	2.8754	157.095
GLN_222@O	ASN_226@H	ASN_226@N	2441650	0.514	2.873	156.128
ASP_121@OD2	THR_118@HG1	THR_118@OG1	2439912	0.5137	2.7007	162.644
GLU_322@O	TYR_330@H	TYR_330@N	2432137	0.512	2.8626	161.127
GLU_364@OE1	HD1_410@HD1	HD1_410@ND1	2431960	0.512	2.7416	157.055
VAL_49@O	ALA_53@H	ALA_53@N	2429324	0.5114	2.8823	157.336
TRP_455@O	HD2_459@H	HD2_459@N	2423676	0.5102	2.8795	162.019
LYS_460@O	ALA_464@H	ALA_464@N	2420586	0.5096	2.879	158.705
LEU_425@O	SER_429@HG	SER_429@OG	2417099	0.5089	2.7993	162.641
ASP_212@O	ALA_216@H	ALA_216@N	2396915	0.5046	2.8908	161.526
ARG_194@O	LEU_198@H	LEU_198@N	2395164	0.5042	2.8717	158.223
MET_180@O	LEU_184@H	LEU_184@N	2378332	0.5007	2.8744	160.356
GLU_364@OE2	ARG_360@HE	ARG_360@NE	2356967	0.4962	2.7867	161.152
ALA_274@O	ASP_278@H	ASP_278@N	2338594	0.4923	2.8762	157.063
HD2_459@O	LEU_463@H	LEU_463@N	2335177	0.4916	2.8927	161.865
ASP_278@O	LYS_282@H	LYS_282@N	2334688	0.4915	2.8764	160.409
GLN_150@O	ALA_154@H	ALA_154@N	2331385	0.4908	2.8769	156.165
VAL_307@O	ALA_311@H	ALA_311@N	2331043	0.4907	2.8841	157.654
GLU_145@O	MET_149@H	MET_149@N	2324215	0.4893	2.8673	162.728
ARG_277@O	ILE_281@H	ILE_281@N	2316065	0.4876	2.8776	158.668
MET_163@O	LEU_167@H	LEU_167@N	2298787	0.484	2.8801	157.031
HD2_201@O	LEU_205@H	LEU_205@N	2295673	0.4833	2.8941	161.886
ILE_18@O	ILE_22@H	ILE_22@N	2284183	0.4809	2.8852	158.214
ASN_161@OD1	LEU_164@H	LEU_164@N	2282804	0.4806	2.8615	153.632
GLU_364@OE1	ARG_360@HH21	ARG_360@NH2	2282694	0.4806	2.8085	158.848
ILE_55@O	ILE_59@H	ILE_59@N	2274504	0.4788	2.8859	160.928
TRP_174@O	ASN_178@HD22	ASN_178@ND2	2262364	0.4763	2.8373	160.146
ILE_440@O	SER_444@HG	SER_444@OG	2258548	0.4755	2.7416	162.264
ASP_379@OD1	THR_376@HG1	THR_376@OG1	2253706	0.4745	2.7022	162.663
ALA_16@O	ASP_20@H	ASP_20@N	2246630	0.473	2.8788	158.884
MET_314@O	LYS_318@H	LYS_318@N	2235808	0.4707	2.8796	158.73
SER_404@O	GLN_408@H	GLN_408@N	2221600	0.4677	2.8777	162.017
ARG_214@O	LEU_218@H	LEU_218@N	2221191	0.4676	2.8875	163.394
LEU_105@O	ILE_109@H	ILE_109@N	2207909	0.4648	2.8898	154.62
LEU_482@O	LYS_486@H	LYS_486@N	2201145	0.4634	2.8873	159.929
GLU_364@OE2	HD1_410@HD1	HD1_410@ND1	2192183	0.4615	2.742	157.315
LEU_224@O	LYS_228@H	LYS_228@N	2187907	0.4606	2.8878	159.654
GLN_374@OE1	HIE_418@H	HIE_418@N	2185475	0.4601	2.8462	158.289
ALA_471@O	LYS_475@H	LYS_475@N	2181838	0.4593	2.891	161.563
PHE_426@O	TRP_430@H	TRP_430@N	2174166	0.4577	2.8715	155.219
GLU_355@OE2	SER_162@HG	SER_162@OG	2170362	0.4569	2.6791	164.95
GLN_408@O	ALA_412@H	ALA_412@N	2163882	0.4556	2.8825	156.412
ALA_53@O	LEU_57@H	LEU_57@N	2160426	0.4548	2.8843	159.842
LEU_320@O	LEU_332@H	LEU_332@N	2154267	0.4535	2.8724	158.33
LEU_363@O	ILE_367@H	ILE_367@N	2150640	0.4528	2.8922	154.993
ASP_20@O	LYS_24@H	LYS_24@N	2149993	0.4526	2.8751	159.511
GLU_364@OE1	ARG_360@HE	ARG_360@NE	2116605	0.4456	2.7881	160.731
ILE_39@O	LEU_43@H	LEU_43@N	2113217	0.4449	2.889	159.976
GLU_132@O	LEU_136@H	LEU_136@N	2109762	0.4442	2.873	157.004
GLU_97@OE1	SER_420@HG	SER_420@OG	2105507	0.4433	2.6927	164.513
ARG_472@O	LEU_476@H	LEU_476@N	2103878	0.4429	2.8885	163.268
ALA_101@O	LEU_105@H	LEU_105@N	2091015	0.4402	2.8919	163.955
LEU_54@O	GLU_58@H	GLU_58@N	2089291	0.4399	2.8706	151.331
ILE_313@O	ILE_317@H	ILE_317@N	2088415	0.4397	2.8894	161.04
GLU_38@O	MET_42@H	MET_42@N	2085312	0.439	2.8769	157.93
GLU_403@O	MET_407@H	MET_407@N	2084596	0.4389	2.8782	162.859
GLU_403@OE1	ARG_452@HH22	ARG_452@NH2	2084253	0.4388	2.7923	156.686
ALA_213@O	LYS_217@H	LYS_217@N	2082784	0.4385	2.8933	161.439
ASN_226@O	ARG_230@H	ARG_230@N	2078018	0.4375	2.8798	158.528
PRO_179@O	GLN_183@H	GLN_183@N	2046761	0.4309	2.8736	158.997
GLU_364@OE2	ARG_360@HH21	ARG_360@NH2	2046022	0.4307	2.8088	158.389
ARG_309@O	ILE_313@H	ILE_313@N	2033134	0.428	2.8873	158.237
GLU_424@OE2	ARG_427@HH21	ARG_427@NH2	2021634	0.4256	2.7849	158.533
GLU_97@OE1	SER_420@H	SER_420@N	2020927	0.4255	2.8213	161.643
ARG_51@O	ILE_55@H	ILE_55@N	2020692	0.4254	2.8862	157.56
MET_56@O	LYS_60@H	LYS_60@N	2017890	0.4248	2.8846	157.682
GLU_424@OE1	ARG_427@HH21	ARG_427@NH2	2013742	0.4239	2.7866	158.704
MET_438@O	LEU_442@H	LEU_442@N	2001838	0.4214	2.8709	161.195
MET_383@O	LEU_387@H	LEU_387@N	2001103	0.4213	2.888	157.514
ILE_440@O	SER_444@H	SER_444@N	1999970	0.421	2.8728	156.448
GLU_483@OE1	GLN_361@HE21	GLN_361@NE2	1970776	0.4149	2.8276	164.671
GLU_225@OE1	GLN_103@HE21	GLN_103@NE2	1949775	0.4105	2.8247	164.578
ILE_297@O	LEU_301@H	LEU_301@N	1944419	0.4094	2.8897	159.85
ASP_379@OD2	THR_376@HG1	THR_376@OG1	1931931	0.4067	2.7003	162.812
GLU_106@OE2	HD1_152@HD1	HD1_152@ND1	1922900	0.4048	2.7408	158.398
ASP_121@OD2	THR_118@H	THR_118@N	1919253	0.4041	2.8443	158.55
GLU_296@O	MET_300@H	MET_300@N	1916603	0.4035	2.8773	157.712
GLU_355@OE2	SER_162@H	SER_162@N	1914759	0.4031	2.8332	161.141
TRP_172@O	GLU_176@H	GLU_176@N	1911854	0.4025	2.8749	158.986
SER_146@O	GLN_150@H	GLN_150@N	1911497	0.4024	2.8786	160.641
ILE_204@O	LEU_208@H	LEU_208@N	1911182	0.4024	2.8995	158.9
LYS_486@O	LEU_490@H	LEU_490@N	1908811	0.4019	2.8838	158.327
ARG_119@O	VAL_123@H	VAL_123@N	1906458	0.4014	2.8825	159.063
GLU_97@OE2	SER_420@HG	SER_420@OG	1904879	0.401	2.6892	164.412
ARG_126@O	GLN_130@H	GLN_130@N	1886883	0.3972	2.8824	157.215
ALA_206@O	LYS_210@H	LYS_210@N	1884784	0.3968	2.8873	159.578
GLN_173@O	ASN_177@H	ASN_177@N	1879180	0.3956	2.8759	157.25
GLU_106@OE1	ARG_102@HE	ARG_102@NE	1870213	0.3937	2.7905	162.989
GLU_97@OE2	SER_420@H	SER_420@N	1869735	0.3936	2.818	161.458
GLU_145@OE2	ARG_194@HH22	ARG_194@NH2	1848671	0.3892	2.8004	153.747
SER_144@O	AP1_148@H	AP1_148@N	1843297	0.3881	2.8381	158.837
ILE_462@O	LEU_466@H	LEU_466@N	1839536	0.3873	2.9003	158.905
GLU_106@OE2	ARG_102@HH21	ARG_102@NH2	1838028	0.387	2.8143	159.86
PRO_35@O	GLU_38@H	GLU_38@N	1835589	0.3864	2.8665	147.626
PRO_293@O	GLU_296@H	GLU_296@N	1833437	0.386	2.866	147.363
ASP_121@OD1	THR_118@HG1	THR_118@OG1	1833092	0.3859	2.7013	162.625
LYS_228@O	LEU_232@H	LEU_232@N	1833015	0.3859	2.8898	157.847
ASP_379@OD1	THR_376@H	THR_376@N	1830781	0.3854	2.8424	158.839
ILE_276@O	ILE_280@H	ILE_280@N	1830420	0.3854	2.8884	157.28
LEU_312@O	GLU_316@H	GLU_316@N	1829291	0.3851	2.879	151.799
GLU_225@OE2	GLN_103@HE21	GLN_103@NE2	1812259	0.3815	2.8245	164.558
GLU_390@O	LEU_394@H	LEU_394@N	1804735	0.3799	2.875	156.333
ARG_230@O	PHE_234@H	PHE_234@N	1803790	0.3797	2.8782	160.68
ALA_128@O	GLU_132@H	GLU_132@N	1803784	0.3797	2.8905	159.591
ARG_377@O	VAL_381@H	VAL_381@N	1791654	0.3772	2.8839	158.897
ALA_464@O	LYS_468@H	LYS_468@N	1788753	0.3766	2.8889	159.434
MET_125@O	LEU_129@H	LEU_129@N	1784726	0.3757	2.8911	156.951
PRO_10@O	VAL_14@H	VAL_14@N	1777793	0.3743	2.8753	164.079
ASN_484@O	ARG_488@H	ARG_488@N	1764896	0.3716	2.8853	159.101
TYR_451@O	TRP_455@H	TRP_455@N	1746637	0.3677	2.8807	161.321
GLU_483@OE2	GLN_361@HE21	GLN_361@NE2	1742679	0.3669	2.8277	164.631
LEU_422@O	PHE_426@H	PHE_426@N	1734510	0.3652	2.8939	157.755
LEU_489@O	SER_493@HG	SER_493@OG	1717893	0.3617	2.7558	162.892
GLU_355@OE1	SER_162@HG	SER_162@OG	1689012	0.3556	2.6845	164.627
VAL_485@O	LEU_489@H	LEU_489@N	1687076	0.3552	2.8883	156.797
LEU_389@O	GLU_393@H	GLU_393@N	1686544	0.3551	2.8791	158.744
PHE_168@O	TRP_172@H	TRP_172@N	1682594	0.3542	2.8773	156.268
GLN_127@O	LEU_131@H	LEU_131@N	1651208	0.3476	2.8833	155.21
GLY_199@O	GLN_203@H	GLN_203@N	1642701	0.3458	2.8894	155.106
VAL_227@O	LEU_231@H	LEU_231@N	1642362	0.3458	2.8904	159.514
GLU_355@OE1	SER_162@H	SER_162@N	1637255	0.3447	2.8227	161.01
GLU_145@OE2	ARG_194@HH12	ARG_194@NH1	1634597	0.3441	2.8093	152.988
GLN_229@O	GLU_233@H	GLU_233@N	1625311	0.3422	2.8852	158.904
ALA_359@O	LEU_363@H	LEU_363@N	1625048	0.3421	2.9001	164.019
LEU_387@O	GLU_391@H	GLU_391@N	1623861	0.3419	2.8873	160.236
GLU_424@OE2	ARG_427@HE	ARG_427@NE	1621888	0.3414	2.8392	157.651
LEU_131@O	GLU_135@H	GLU_135@N	1615008	0.34	2.884	159.622
GLU_36@OE1	ARG_47@HE	ARG_47@NE	1591499	0.3351	2.8126	154.194
LEU_21@O	THR_25@H	THR_25@N	1591228	0.335	2.869	153.725
ASP_379@OD2	THR_376@H	THR_376@N	1589743	0.3347	2.8431	158.814
GLY_78@O	THR_82@HG1	THR_82@OG1	1584137	0.3335	2.7521	161.928
HD3_223@O	VAL_227@H	VAL_227@N	1574834	0.3315	2.903	158.927
SER_402@O	AP1_406@H	AP1_406@N	1569799	0.3305	2.8633	161.049
PRO_353@O	LEU_357@H	LEU_357@N	1568217	0.3302	2.889	159.03
LYS_124@O	ALA_128@H	ALA_128@N	1565443	0.3296	2.8904	157.985
GLN_487@O	GLU_491@H	GLU_491@N	1561772	0.3288	2.8797	158.491
PRO_95@O	LEU_99@H	LEU_99@N	1556846	0.3278	2.8888	158.629
ARG_384@O	GLN_388@H	GLN_388@N	1556468	0.3277	2.886	156.824
GLU_289@O	VAL_331@H	VAL_331@N	1543381	0.3249	2.8795	161.89
GLU_36@OE2	ARG_47@HE	ARG_47@NE	1540686	0.3244	2.8129	154.2
GLU_424@OE1	ARG_427@HE	ARG_427@NE	1524171	0.3209	2.8382	157.975
MET_220@O	LEU_224@H	LEU_224@N	1519062	0.3198	2.9119	162.362
LEU_167@O	SER_171@HG	SER_171@OG	1517834	0.3195	2.8044	162.929
ARG_19@O	ILE_23@H	ILE_23@N	1516219	0.3192	2.8865	158.267
GLU_355@O	ALA_359@H	ALA_359@N	1515321	0.319	2.898	155.35
ALA_386@O	GLU_390@H	GLU_390@N	1502330	0.3163	2.8862	160.219
LEU_129@O	GLU_133@H	GLU_133@N	1495084	0.3148	2.8932	159.914
GLY_457@O	GLN_461@H	GLN_461@N	1488828	0.3134	2.8938	155.503
MET_17@O	LEU_21@H	LEU_21@N	1488095	0.3133	2.8915	155.469
GLU_310@O	MET_314@H	MET_314@N	1487145	0.3131	2.8943	157.001
TRP_479@O	GLN_361@HE22	GLN_361@NE2	1470859	0.3097	2.888	160.156
SER_79@O	ASP_83@H	ASP_83@N	1465319	0.3085	2.8689	156.179
SER_401@O	SER_404@HG	SER_404@OG	1465223	0.3085	2.7188	161.561
GLU_13@O	MET_17@H	MET_17@N	1463223	0.308	2.89	155.811
GLU_271@O	MET_275@H	MET_275@N	1460164	0.3074	2.8888	157.15
GLU_58@O	GLY_61@H	GLY_61@N	1453701	0.306	2.8804	146.931
ASP_121@OD1	THR_118@H	THR_118@N	1449029	0.3051	2.8444	158.593
GLU_52@O	MET_56@H	MET_56@N	1435535	0.3022	2.8958	156.964
GLU_403@OE2	ARG_452@HH22	ARG_452@NH2	1435192	0.3021	2.7876	157.279
TYR_193@O	GLU_196@H	GLU_196@N	1415511	0.298	2.8705	148.026
PRO_268@O	VAL_272@H	VAL_272@N	1414856	0.2979	2.8853	162.901
LEU_425@O	SER_429@H	SER_429@N	1404111	0.2956	2.9044	160.185
GLN_12@O	ALA_16@H	ALA_16@N	1398726	0.2945	2.8831	155.104
LEU_231@O	SER_235@H	SER_235@N	1397693	0.2943	2.8879	155.4
ARG_488@O	PHE_492@H	PHE_492@N	1393500	0.2934	2.8693	159.263
GLN_431@O	ASN_435@H	ASN_435@N	1381130	0.2908	2.8723	155.388
GLU_38@OE1	ARG_37@HE	ARG_37@NE	1378519	0.2902	2.8164	159.129
LYS_382@O	ALA_386@H	ALA_386@N	1378391	0.2902	2.8945	156.836
GLN_203@O	ALA_207@H	ALA_207@N	1378085	0.2901	2.8976	158.159
HD1_410@O	ALA_414@H	ALA_414@N	1376836	0.2899	2.9021	158.242
GLU_36@OE1	ARG_47@HH21	ARG_47@NH2	1376719	0.2898	2.8047	152.084
GLN_361@O	SER_365@HG	SER_365@OG	1.17052e+06	0.246432	2.86504	157.817
GLN_103@O	SER_107@HG	SER_107@OG	1.16206e+06	0.244651	2.86512	157.808
ARG_360@O	GLU_364@H	GLU_364@N	1.1536e+06	0.242869	2.86521	157.799
GLU_403@OE2	ARG_433@HH12	ARG_433@NH1	1370284	0.2885	2.8048	156.223
THR_118@O	ILE_122@H	ILE_122@N	1369472	0.2883	2.9063	160.541
ALA_474@O	MET_478@H	MET_478@N	1364372	0.2872	2.9075	159.033
THR_306@O	GLU_310@H	GLU_310@N	1356753	0.2856	2.8945	161.002
LEU_279@O	THR_283@H	THR_283@N	1353664	0.285	2.8715	152.944
LEU_164@O	PHE_168@H	PHE_168@N	1343311	0.2828	2.8964	156.882
GLU_97@O	ALA_101@H	ALA_101@N	1337269	0.2815	2.9041	155.97
ASP_447@OD2	ARG_452@HH21	ARG_452@NH2	1335949	0.2813	2.8022	155.674
GLU_36@OE2	ARG_47@HH21	ARG_47@NH2	1333852	0.2808	2.8049	152.12
GLU_196@O	ASP_200@H	ASP_200@N	1330546	0.2801	2.8857	153.477
GLU_294@OE2	ARG_305@HE	ARG_305@NE	1326776	0.2793	2.8122	154.487
MET_478@O	LEU_482@H	LEU_482@N	1324502	0.2788	2.9146	162.399
TRP_439@O	HIE_443@H	HIE_443@N	1321486	0.2782	2.8883	159.914
GLU_38@OE2	ARG_37@HE	ARG_37@NE	1319494	0.2778	2.8167	159.028
GLU_378@O	LYS_382@H	LYS_382@N	1307332	0.2752	2.8922	157.613
VAL_73@O	GLY_30@H	GLY_30@N	1302758	0.2743	2.8527	160.919
ASP_458@OD2	HD3_481@HD1	HD3_481@ND1	1302246	0.2742	2.8321	157.487
GLU_38@OE2	ARG_37@HH21	ARG_37@NH2	1301113	0.2739	2.8064	156.281
GLU_454@O	ASP_458@H	ASP_458@N	1300824	0.2739	2.8881	153.416
GLU_145@OE1	ARG_194@HH22	ARG_194@NH2	1299614	0.2736	2.7976	154.375
ASN_436@OD1	MET_438@H	MET_438@N	1299117	0.2735	2.8677	150.463
GLU_294@OE1	ARG_309@HE	ARG_309@NE	1292535	0.2721	2.8121	158.313
GLU_294@OE2	ARG_305@HH21	ARG_305@NH2	1291132	0.2718	2.8046	152.559
ASP_190@O	ARG_194@H	ARG_194@N	1280703	0.2696	2.8537	161.392
GLU_390@OE2	HD2_459@HD1	HD2_459@ND1	1278524	0.2692	2.775	155.196
GLU_294@OE1	ARG_305@HE	ARG_305@NE	1278490	0.2692	2.812	154.652
ARG_9@O	GLN_12@H	GLN_12@N	1274586	0.2683	2.8858	154.518
GLU_294@OE2	ARG_309@HH21	ARG_309@NH2	1271339	0.2677	2.8056	156.492
GLU_132@OE1	ARG_194@HH11	ARG_194@NH1	1269135	0.2672	2.7815	161.218
PRO_293@O	ILE_297@H	ILE_297@N	1265779	0.2665	2.8978	159.549
GLY_94@O	LEU_98@H	LEU_98@N	1265472	0.2664	2.8929	160.498
ASP_447@OD1	ARG_452@HH21	ARG_452@NH2	1262979	0.2659	2.8033	155.195
SER_365@O	GLU_369@H	GLU_369@N	1257502	0.2647	2.9065	156.515
GLY_78@O	THR_82@H	THR_82@N	1250205	0.2632	2.8754	158.709
GLN_461@O	ALA_465@H	ALA_465@N	1249852	0.2631	2.8994	158.308
THR_376@O	ILE_380@H	ILE_380@N	1244069	0.2619	2.9078	160.657
TRP_172@O	ARG_175@H	ARG_175@N	1234812	0.26	2.8769	151.858
ASP_238@OD2	TYR_241@H	TYR_241@N	1232711	0.2595	2.8334	160.732
GLU_294@OE1	ARG_305@HH21	ARG_305@NH2	1231993	0.2594	2.8052	152.613
GLU_38@OE1	ARG_37@HH21	ARG_37@NH2	1231644	0.2593	2.8078	155.833
ASP_458@OD1	HD3_481@HD1	HD3_481@ND1	1231145	0.2592	2.8306	157.155
GLU_294@OE1	ARG_309@HH21	ARG_309@NH2	1230086	0.259	2.8066	156.075
GLU_120@O	LYS_124@H	LYS_124@N	1229053	0.2587	2.8926	157.334
ILE_182@O	SER_186@H	SER_186@N	1229048	0.2587	2.8717	154.366
GLU_294@OE2	ARG_309@HE	ARG_309@NE	1226004	0.2581	2.8111	158.221
TRP_181@O	HIE_185@H	HIE_185@N	1225599	0.258	2.8875	160.686
SER_107@O	GLU_111@H	GLU_111@N	1216697	0.2561	2.9081	156.982
GLN_183@O	HIE_187@H	HIE_187@N	1175792	0.2475	2.8701	156.111
GLU_390@OE1	HD2_459@HD1	HD2_459@ND1	1168332	0.246	2.7768	154.88
GLU_403@OE1	ARG_452@HH12	ARG_452@NH1	1167260	0.2457	2.8124	154.551
GLN_385@O	LEU_389@H	LEU_389@N	1167115	0.2457	2.885	154.659
ASN_226@OD1	TRP_197@HE1	TRP_197@NE1	1153956	0.2429	2.8455	156.55
ALA_40@O	VAL_45@H	VAL_45@N	1152097	0.2425	2.9031	160.976
GLU_166@OE1	ARG_169@HH21	ARG_169@NH2	1149876	0.2421	2.7861	157.501
GLN_270@O	ALA_274@H	ALA_274@N	1148866	0.2419	2.8883	153.782
ASP_200@OD1	HD3_223@HD1	HD3_223@ND1	1147861	0.2417	2.833	156.432
PRO_35@O	ILE_39@H	ILE_39@N	1146111	0.2413	2.898	159.995
PRO_437@O	GLN_441@H	GLN_441@N	1139708	0.2399	2.8865	160.133
ASP_497@O	ASP_501@H	ASP_501@N	1135802	0.2391	2.8706	160.512
GLN_170@O	TRP_174@H	TRP_174@N	1132737	0.2385	2.8886	161.023
GLN_388@O	ARG_392@H	ARG_392@N	1127471	0.2374	2.8862	153.352
SER_143@O	SER_146@HG	SER_146@OG	1126208	0.2371	2.7314	160.604
ALA_113@O	GLN_116@H	GLN_116@N	1125565	0.237	2.8864	151.795
GLU_132@OE2	ARG_194@HH11	ARG_194@NH1	1125009	0.2368	2.7762	160.381
TRP_221@O	GLN_103@HE22	GLN_103@NE2	1122795	0.2364	2.8907	159.624
LEU_167@O	SER_171@H	SER_171@N	1122610	0.2363	2.902	158.016
SER_337@O	ASP_341@H	ASP_341@N	1120460	0.2359	2.859	156.659
GLU_296@OE2	ARG_295@HE	ARG_295@NE	1113599	0.2344	2.8171	158.983
GLU_296@OE1	ARG_295@HH21	ARG_295@NH2	1110885	0.2339	2.8079	156.038
GLU_166@OE2	ARG_169@HE	ARG_169@NE	1109871	0.2337	2.8423	157.535
GLU_296@OE2	ARG_295@HH21	ARG_295@NH2	1107650	0.2332	2.808	155.933
ARG_134@O	SER_138@H	SER_138@N	1105505	0.2327	2.8802	155.175
LEU_489@O	SER_493@H	SER_493@N	1101013	0.2318	2.8828	155.684
GLN_170@O	GLN_170@HE22	GLN_170@NE2	1095663	0.2307	2.8733	151.326
GLU_36@OE1	ARG_51@HH21	ARG_51@NH2	1090937	0.2297	2.7953	156.587
ASN_236@OD1	ASP_239@H	ASP_239@N	1088628	0.2292	2.849	149.792
GLU_36@OE2	ARG_51@HH21	ARG_51@NH2	1082486	0.2279	2.7952	156.482
GLU_296@OE1	ARG_295@HE	ARG_295@NE	1082075	0.2278	2.8171	158.998
GLU_133@O	ALA_137@H	ALA_137@N	1081034	0.2276	2.8831	156.645
TYR_451@O	GLU_454@H	GLU_454@N	1078736	0.2271	2.876	147.81
GLU_145@OE1	ARG_194@HH12	ARG_194@NH1	1076522	0.2266	2.8091	153.256
GLU_166@OE1	ARG_169@HE	ARG_169@NE	1075680	0.2265	2.8421	156.993
ASP_75@OD1	SER_77@HG	SER_77@OG	1075649	0.2265	2.6736	163.174
GLN_170@OE1	GLN_428@HE22	GLN_428@NE2	1074349	0.2262	2.8381	159.23
ASP_341@O	ALA_345@H	ALA_345@N	1071496	0.2256	2.8678	156.453
LEU_232@O	ASN_236@HD22	ASN_236@ND2	1068733	0.225	2.8434	160.069
GLY_328@O	ARG_324@H	ARG_324@N	1061553	0.2235	2.8635	156.779
ASN_484@OD1	TRP_455@HE1	TRP_455@NE1	1059933	0.2231	2.8444	155.255
GLU_31@O	VAL_73@H	VAL_73@N	1059690	0.2231	2.8798	162.365
GLU_322@OE1	ARG_324@HE	ARG_324@NE	1059242	0.223	2.8297	156.426
GLU_322@OE2	ARG_324@HE	ARG_324@NE	1056580	0.2224	2.8295	156.49
ASN_178@O	TRP_181@H	TRP_181@N	1054990	0.2221	2.881	152.731
GLU_166@OE2	ARG_169@HH21	ARG_169@NH2	1049182	0.2209	2.7884	157.052
TYR_193@O	TRP_197@H	TRP_197@N	1044659	0.2199	2.8917	159.684
HD1_152@O	ALA_156@H	ALA_156@N	1039962	0.2189	2.908	156.987
ASP_448@O	ARG_452@H	ARG_452@N	1034197	0.2177	2.8796	163.857
ASP_190@OD1	ARG_194@HH21	ARG_194@NH2	1028280	0.2165	2.7879	155.437
ALA_371@O	GLN_374@H	GLN_374@N	1027863	0.2164	2.888	151.459
HD3_481@O	VAL_485@H	VAL_485@N	1024356	0.2157	2.9087	157.504
VAL_331@O	GLY_288@H	GLY_288@N	1021061	0.215	2.85	158.594
GLU_135@OE2	SER_143@HG	SER_143@OG	1020679	0.2149	2.6769	163.132
ARG_134@O	SER_138@HG	SER_138@OG	1016852	0.2141	2.7474	161.915
SER_449@O	LYS_453@H	LYS_453@N	1004693	0.2115	2.8856	157.026
GLU_36@OE2	ARG_51@HE	ARG_51@NE	1002779	0.2111	2.8266	157.212
GLU_393@OE2	SER_402@HG	SER_402@OG	1002699	0.2111	2.6709	164.34
GLU_135@OE1	SER_143@HG	SER_143@OG	994146	0.2093	2.676	163.182
GLU_132@OE2	HD2_201@HD1	HD2_201@ND1	993706	0.2092	2.7672	151.632
GLY_352@O	LEU_356@H	LEU_356@N	993366	0.2091	2.8941	159.505
GLU_403@OE2	ARG_452@HH12	ARG_452@NH1	981735	0.2067	2.8094	155.681
GLU_36@OE1	ARG_51@HE	ARG_51@NE	976184	0.2055	2.8267	157.149
ASP_83@O	ALA_87@H	ALA_87@N	973569	0.205	2.8727	157.386
GLU_64@OE2	ARG_66@HH21	ARG_66@NH2	967092	0.2036	2.7927	152.233
ASP_238@OD1	TYR_241@H	TYR_241@N	964468	0.203	2.8351	159.608
ASP_447@OD1	ARG_452@HE	ARG_452@NE	962712	0.2027	2.8431	154.875
ARG_175@O	ASN_178@H	ASN_178@N	961878	0.2025	2.8945	152.822
GLU_64@OE2	ARG_66@HE	ARG_66@NE	953041	0.2006	2.8194	153.725
GLU_41@OE1	ARG_37@HH12	ARG_37@NH1	943386	0.1986	2.8093	157.479
ASN_286@O	GLU_289@H	GLU_289@N	941452	0.1982	2.8987	155.939
PRO_141@O	GLU_145@H	GLU_145@N	941384	0.1982	2.8584	154.016
GLU_132@OE1	HD2_201@HD1	HD2_201@ND1	940342	0.198	2.7684	151.364
LEU_232@O	ASN_236@H	ASN_236@N	937287	0.1973	2.8728	154.118
ARG_37@O	GLU_41@H	GLU_41@N	933516	0.1965	2.8977	155.989
GLU_41@OE2	ARG_37@HH12	ARG_37@NH1	930287	0.1958	2.8095	157.451
ASP_189@OD1	ARG_194@HE	ARG_194@NE	929553	0.1957	2.8109	155.427
ALA_140@O	SER_144@H	SER_144@N	927190	0.1952	2.8918	158.101
LEU_466@O	LYS_469@H	LYS_469@N	925286	0.1948	2.8988	146.625
LEU_208@O	LYS_211@H	LYS_211@N	916539	0.193	2.8997	146.755
GLU_393@OE2	SER_402@H	SER_402@N	896674	0.1888	2.8434	160.061
ASP_189@OD1	ARG_194@HH21	ARG_194@NH2	896257	0.1887	2.8012	153.872
MET_275@O	LEU_279@H	LEU_279@N	892814	0.188	2.8976	155.517
ARG_295@O	GLU_299@H	GLU_299@N	887579	0.1869	2.8953	155.563
ASP_447@O	SER_3@H	SER_3@N	883806	0.1861	2.8365	156.482
ASP_447@OD2	ARG_452@HE	ARG_452@NE	877125	0.1847	2.8422	154.776
LEU_490@O	SER_493@HG	SER_493@OG	866667	0.1825	2.7141	160.728
ASN_108@O	PHE_112@H	PHE_112@N	859947	0.181	2.9083	157.108
GLU_390@OE2	ARG_452@HH11	ARG_452@NH1	856318	0.1803	2.7998	158.823
GLN_130@O	ARG_134@H	ARG_134@N	855136	0.18	2.8888	152.025
GLY_70@O	ARG_32@HH11	ARG_32@NH1	854876	0.18	2.8228	155.701
ASP_200@OD2	HD3_223@HD1	HD3_223@ND1	854870	0.18	2.8342	156.124
GLN_361@OE1	LYS_486@HZ3	LYS_486@NZ	853482	0.1797	2.7956	152.915
GLU_403@OE1	ARG_433@HH12	ARG_433@NH1	850548	0.1791	2.8048	155.343
GLN_361@OE1	LYS_486@HZ2	LYS_486@NZ	849923	0.1789	2.7957	152.931
GLU_41@OE2	ARG_37@HH22	ARG_37@NH2	849105	0.1788	2.8078	156.761
GLU_41@OE1	ARG_37@HH22	ARG_37@NH2	847248	0.1784	2.8079	156.746
GLN_361@OE1	LYS_486@HZ1	LYS_486@NZ	847212	0.1784	2.7956	152.899
PHE_242@O	TYR_245@H	TYR_245@N	844967	0.1779	2.8897	155.775
ASP_238@OD2	ILE_240@H	ILE_240@N	844774	0.1778	2.8791	156.845
PHE_409@O	ILE_413@H	ILE_413@N	843410	0.1776	2.9107	157.148
SER_162@O	GLU_166@H	GLU_166@N	843325	0.1775	2.8978	155.195
GLU_64@OE1	ARG_66@HH21	ARG_66@NH2	843293	0.1775	2.7941	152.47
ASN_436@O	TRP_439@H	TRP_439@N	840239	0.1769	2.8737	150.349
ALA_368@O	ALA_372@H	ALA_372@N	836264	0.1761	2.9076	156.018
GLU_64@OE1	ARG_66@HE	ARG_66@NE	836062	0.176	2.8217	153.997
GLN_270@OE1	GLN_270@H	GLN_270@N	822543	0.1732	2.8391	148.595
ALA_414@O	THR_417@H	THR_417@N	820454	0.1727	2.9151	154.444
ASP_458@OD2	ASN_484@HD22	ASN_484@ND2	820414	0.1727	2.8379	159.276
GLU_403@OE2	ARG_433@HH22	ARG_433@NH2	809186	0.1704	2.8055	153.197
SER_191@O	LYS_195@H	LYS_195@N	808581	0.1702	2.8811	152.995
SER_143@O	GLY_147@H	GLY_147@N	808221	0.1702	2.8713	153.376
GLU_391@O	ALA_395@H	ALA_395@N	804262	0.1693	2.8864	155.452
ASN_161@OD1	MET_163@H	MET_163@N	801160	0.1687	2.8559	144.635
THR_304@O	VAL_307@H	VAL_307@N	797410	0.1679	2.8899	147.105
GLU_390@OE1	ARG_452@HH11	ARG_452@NH1	795181	0.1674	2.8055	158.336
ALA_110@O	ALA_114@H	ALA_114@N	791277	0.1666	2.9068	155.445
ASP_447@O	TYR_451@H	TYR_451@N	788755	0.1661	2.8628	156.678
LEU_184@O	LEU_188@H	LEU_188@N	785809	0.1654	2.8704	158.552
GLN_80@O	SER_84@H	SER_84@N	785422	0.1654	2.8798	156.582
ASN_177@OD1	GLN_173@HE22	GLN_173@NE2	780391	0.1643	2.8519	157.071
LEU_504@O	TRP_508@H	TRP_508@N	776886	0.1636	2.8366	161.245
THR_118@O	ASP_121@H	ASP_121@N	767486	0.1616	2.883	145.201
GLU_120@OE2	ARG_119@HH21	ARG_119@NH2	764820	0.161	2.8107	154.074
PRO_251@O	LYS_254@H	LYS_254@N	763578	0.1608	2.8799	154.37
THR_376@O	ASP_379@H	ASP_379@N	763542	0.1607	2.8819	145.262
ALA_298@O	VAL_303@H	VAL_303@N	762897	0.1606	2.9034	160.657
GLU_120@OE1	ARG_119@HH21	ARG_119@NH2	758019	0.1596	2.8111	153.945
TYR_241@O	TYR_245@H	TYR_245@N	751496	0.1582	2.8721	159.639
GLU_64@OE1	ARG_32@HH22	ARG_32@NH2	750450	0.158	2.7984	159.395
TRP_430@O	GLN_12@HE21	GLN_12@NE2	748729	0.1576	2.8416	163.216
GLU_299@OE1	ARG_295@HH22	ARG_295@NH2	746071	0.1571	2.808	156.732
GLY_336@O	THR_340@HG1	THR_340@OG1	744322	0.1567	2.7564	161.349
GLU_135@OE2	ARG_134@HH21	ARG_134@NH2	744135	0.1567	2.8051	153.252
ASP_75@OD2	SER_77@HG	SER_77@OG	742643	0.1563	2.6789	163.209
ASN_366@O	PHE_370@H	PHE_370@N	740359	0.1559	2.9091	157.973
TYR_245@O	TRP_250@HE1	TRP_250@NE1	740276	0.1558	2.8475	160.198
VAL_323@O	ARG_325@HH11	ARG_325@NH1	739902	0.1558	2.7968	152.101
GLU_299@OE2	ARG_295@HH22	ARG_295@NH2	739081	0.1556	2.8082	156.729
ASN_28@O	GLU_31@H	GLU_31@N	737988	0.1554	2.9012	155.298
GLU_145@OE1	ARG_175@HH22	ARG_175@NH2	737932	0.1554	2.8012	154.871
LEU_246@O	SER_249@H	SER_249@N	735186	0.1548	2.881	153.193
ARG_324@O	ALA_327@H	ALA_327@N	735007	0.1547	2.8796	152.679
GLU_120@OE1	ARG_119@HE	ARG_119@NE	732233	0.1542	2.8296	155.614
ASP_190@O	TYR_193@H	TYR_193@N	725122	0.1527	2.8765	149.238
SER_146@O	ARG_194@HH12	ARG_194@NH1	724200	0.1525	2.7872	155.863
GLU_135@OE1	ARG_134@HH21	ARG_134@NH2	723315	0.1523	2.805	153.651
TRP_430@O	ARG_433@H	ARG_433@N	722123	0.152	2.9048	150.586
PRO_10@O	GLN_12@H	GLN_12@N	717335	0.151	2.8301	149.303
GLU_120@OE2	ARG_119@HE	ARG_119@NE	716089	0.1508	2.8299	155.541
GLU_316@OE1	ARG_325@HH12	ARG_325@NH1	714433	0.1504	2.8095	157.007
GLN_103@OE1	LYS_228@HZ3	LYS_228@NZ	709670	0.1494	2.8014	153.197
GLN_431@OE1	THR_5@HG1	THR_5@OG1	707871	0.149	2.7647	161.086
GLN_103@OE1	LYS_228@HZ2	LYS_228@NZ	707148	0.1489	2.8007	153.16
HIE_443@O	LEU_446@H	LEU_446@N	704413	0.1483	2.8955	153.526
GLN_103@OE1	LYS_228@HZ1	LYS_228@NZ	704062	0.1482	2.8013	153.21
GLU_483@OE1	LYS_486@HZ1	LYS_486@NZ	702164	0.1478	2.7722	157.423
GLU_322@OE1	ARG_324@HH21	ARG_324@NH2	701651	0.1477	2.802	155.958
GLU_483@OE1	LYS_486@HZ3	LYS_486@NZ	699858	0.1473	2.7722	157.407
GLU_393@OE2	SER_401@HG	SER_401@OG	698929	0.1471	2.6715	163.071
GLU_316@OE2	ARG_325@HH12	ARG_325@NH1	697714	0.1469	2.8097	157.16
GLU_64@OE2	ARG_32@HH12	ARG_32@NH1	696346	0.1466	2.7939	160.371
PHE_492@O	VAL_495@H	VAL_495@N	695640	0.1465	2.8606	153.638
PHE_151@O	ILE_155@H	ILE_155@N	695140	0.1463	2.9151	156.651
ASP_497@O	PHE_500@H	PHE_500@N	694176	0.1461	2.885	156.055
SER_397@O	SER_449@HG	SER_449@OG	694118	0.1461	2.7096	157.6
GLU_483@OE1	LYS_486@HZ2	LYS_486@NZ	692099	0.1457	2.7725	157.381
ASP_190@OD2	ARG_194@HH21	ARG_194@NH2	688595	0.145	2.7897	155.386
GLU_322@OE2	ARG_324@HH21	ARG_324@NH2	681755	0.1435	2.8027	155.909
ASP_189@OD2	SER_191@HG	SER_191@OG	680810	0.1433	2.681	163.793
PHE_370@O	GLN_374@H	GLN_374@N	680768	0.1433	2.8866	160.093
ASP_189@OD1	SER_191@HG	SER_191@OG	679442	0.143	2.6801	163.782
GLN_358@OE1	ASN_161@HD22	ASN_161@ND2	678961	0.1429	2.8452	161.811
ASP_458@OD1	ASN_484@HD22	ASN_484@ND2	678388	0.1428	2.8413	159.44
GLU_58@OE1	ARG_66@HH21	ARG_66@NH2	677869	0.1427	2.7914	154.101
GLU_424@OE2	SER_84@HG	SER_84@OG	677082	0.1425	2.6838	163.167
SER_401@O	SER_404@H	SER_404@N	676233	0.1424	2.8994	156.244
ASP_239@OD1	ASN_236@HD21	ASN_236@ND2	674809	0.1421	2.8183	162.596
LEU_442@O	LEU_446@H	LEU_446@N	674428	0.142	2.8903	157.495
GLU_157@OE1	THR_263@HG1	THR_263@OG1	673659	0.1418	2.699	162.735
GLU_393@OE1	SER_401@HG	SER_401@OG	673510	0.1418	2.6698	162.779
GLU_166@OE1	SER_342@HG	SER_342@OG	673145	0.1417	2.6715	163.955
ASP_189@OD2	ASP_190@H	ASP_190@N	672275	0.1415	2.8251	145.863
ASP_239@OD2	ASN_236@HD21	ASN_236@ND2	671628	0.1414	2.8184	162.589
ASP_189@OD2	ARG_194@HH21	ARG_194@NH2	669660	0.141	2.7926	156.137
ASP_190@OD1	ARG_194@HE	ARG_194@NE	668274	0.1407	2.8385	155.032
GLU_434@OE2	ARG_433@HE	ARG_433@NE	666915	0.1404	2.8166	154.089
THR_46@O	VAL_49@H	VAL_49@N	666870	0.1404	2.8959	147.229
GLN_12@OE1	ARG_433@HE	ARG_433@NE	660860	0.1391	2.8436	151.671
ASN_419@OD1	MET_421@H	MET_421@N	660509	0.1391	2.8688	143.727
GLY_502@O	ASP_506@H	ASP_506@N	659425	0.1388	2.8558	159.107
ALA_156@O	THR_159@H	THR_159@N	657118	0.1383	2.9162	155.148
GLN_441@O	HIE_445@H	HIE_445@N	656931	0.1383	2.8811	153.237
LEU_389@O	SER_401@HG	SER_401@OG	654885	0.1379	2.7077	162.862
PHE_234@O	ASP_238@H	ASP_238@N	654574	0.1378	2.8722	160.352
ALA_93@O	PHE_96@H	PHE_96@N	653998	0.1377	2.878	147.365
PRO_343@O	ASN_436@HD22	ASN_436@ND2	652382	0.1373	2.836	161.516
ASN_88@O	ASN_91@HD22	ASN_91@ND2	645807	0.136	2.8209	161.237
GLN_12@OE1	ARG_9@H	ARG_9@N	645784	0.136	2.8737	160.777
TRP_432@O	ASN_436@HD22	ASN_436@ND2	643987	0.1356	2.8437	158.302
ASP_333@O	ARG_66@HH11	ARG_66@NH1	643830	0.1355	2.8228	154.431
ARG_488@O	HIE_445@HE2	HIE_445@NE2	643715	0.1355	2.8358	156.819
SER_264@O	GLN_150@HE22	GLN_150@NE2	643185	0.1354	2.8238	158.775
GLU_64@OE1	ARG_67@HE	ARG_67@NE	642333	0.1352	2.8102	153.459
GLU_166@OE2	ARG_169@HH22	ARG_169@NH2	640710	0.1349	2.7925	158.818
ASN_436@OD1	TRP_439@H	TRP_439@N	638942	0.1345	2.8854	160.934
GLU_378@OE1	ARG_377@HE	ARG_377@NE	638316	0.1344	2.8297	155.565
GLU_135@O	ALA_140@H	ALA_140@N	635545	0.1338	2.8918	160.604
GLU_378@OE2	ARG_377@HE	ARG_377@NE	634089	0.1335	2.8297	155.603
GLY_336@O	ASN_177@HD22	ASN_177@ND2	633536	0.1334	2.8333	162.022
GLU_434@OE1	ARG_433@HE	ARG_433@NE	633433	0.1334	2.8177	153.879
ASP_448@OD1	LEU_450@H	LEU_450@N	631945	0.133	2.8831	162.677
GLU_424@OE1	SER_84@HG	SER_84@OG	631204	0.1329	2.6847	163.021
GLU_145@OE1	ARG_175@HH12	ARG_175@NH1	630899	0.1328	2.7945	154.706
GLU_58@OE1	ARG_66@HE	ARG_66@NE	627944	0.1322	2.8188	154.585
ASP_501@O	LEU_504@H	LEU_504@N	627752	0.1322	2.8831	150.734
GLN_80@OE1	THR_82@H	THR_82@N	627740	0.1322	2.8431	151.428
THR_304@O	VAL_308@H	VAL_308@N	626586	0.1319	2.9132	161.411
GLU_483@OE2	LYS_486@HZ1	LYS_486@NZ	625368	0.1317	2.7734	157.33
GLU_483@OE2	LYS_486@HZ3	LYS_486@NZ	624632	0.1315	2.7733	157.335
SER_420@O	GLU_424@H	GLU_424@N	624280	0.1314	2.9055	156.839
GLU_483@OE2	LYS_486@HZ2	LYS_486@NZ	624002	0.1314	2.7733	157.356
GLU_166@OE2	SER_342@HG	SER_342@OG	622544	0.1311	2.6754	163.6
GLN_170@OE1	ASN_81@HD21	ASN_81@ND2	621609	0.1309	2.8554	158.616
ASP_189@OD2	ARG_194@HE	ARG_194@NE	618456	0.1302	2.8286	155.712
ASP_190@OD2	ARG_194@HE	ARG_194@NE	617841	0.1301	2.8397	156.984
LEU_446@O	ARG_488@HE	ARG_488@NE	616771	0.1298	2.8413	156.725
GLN_183@O	SER_186@H	SER_186@N	616599	0.1298	2.8964	150.944
ASP_238@OD1	ILE_240@H	ILE_240@N	612481	0.1289	2.8797	156.858
GLN_116@OE1	THR_159@HG1	THR_159@OG1	610756	0.1286	2.7288	160.565
ARG_324@O	GLY_328@H	GLY_328@N	609659	0.1283	2.8883	158.243
TYR_241@O	LEU_246@H	LEU_246@N	609490	0.1283	2.8979	151.388
GLU_135@OE2	ARG_134@HE	ARG_134@NE	609426	0.1283	2.827	153.659
ASN_81@OD1	GLN_170@HE21	GLN_170@NE2	607288	0.1278	2.8572	159.384
PRO_268@O	GLU_271@H	GLU_271@N	606012	0.1276	2.8807	146.403
GLU_299@OE2	ARG_295@HH12	ARG_295@NH1	604048	0.1272	2.8095	157.345
GLU_491@OE1	ARG_488@HH21	ARG_488@NH2	602361	0.1268	2.8058	156.215
PRO_509@O	LYS_512@H	LYS_512@N	601042	0.1265	2.8946	156.407
ALA_4@O	GLN_8@H	GLN_8@N	600494	0.1264	2.856	161.239
ALA_412@O	ALA_416@H	ALA_416@N	599193	0.1261	2.8838	146.647
TYR_499@O	TYR_503@H	TYR_503@N	598044	0.1259	2.8729	160.979
GLU_166@OE1	ARG_169@HH22	ARG_169@NH2	596909	0.1257	2.7921	158.712
GLU_157@OE1	SER_261@HG	SER_261@OG	595482	0.1254	2.6605	164.846
GLU_299@OE1	ARG_295@HH12	ARG_295@NH1	594449	0.1251	2.8095	157.284
GLU_64@OE1	ARG_67@HH21	ARG_67@NH2	593854	0.125	2.8018	150.361
GLU_403@OE1	ARG_433@HH22	ARG_433@NH2	592824	0.1248	2.8018	153.671
GLU_403@OE1	HIE_443@HE2	HIE_443@NE2	592753	0.1248	2.8405	156.56
GLU_491@OE2	ARG_488@HH21	ARG_488@NH2	592705	0.1248	2.8061	156.216
TYR_241@O	GLY_244@H	GLY_244@N	591937	0.1246	2.8871	147.513
GLU_233@OE1	ARG_230@HH11	ARG_230@NH1	589923	0.1242	2.7954	158.369
ARG_392@O	SER_396@H	SER_396@N	587881	0.1238	2.8815	155.811
ASP_333@OD2	SER_335@HG	SER_335@OG	587833	0.1238	2.6886	162.934
GLU_355@OE1	ASN_349@HD22	ASN_349@ND2	586801	0.1235	2.8292	165.914
ASP_189@OD2	ARG_230@HH21	ARG_230@NH2	585384	0.1232	2.7813	158.992
SER_77@O	ASN_81@H	ASN_81@N	584642	0.1231	2.8732	157.918
PHE_112@O	GLN_116@H	GLN_116@N	583941	0.1229	2.891	161.495
GLU_225@OE1	LYS_228@HZ1	LYS_228@NZ	582292	0.1226	2.7814	156.282
GLU_434@OE1	GLN_12@HE22	GLN_12@NE2	582241	0.1226	2.8194	161.311
ASP_83@OD2	ARG_67@HH12	ARG_67@NH1	581686	0.1225	2.7963	154.893
MET_1@O	GLN_428@HE21	GLN_428@NE2	581215	0.1224	2.8466	160.616
GLU_233@OE2	ARG_230@HH11	ARG_230@NH1	580898	0.1223	2.7956	158.376
GLU_225@OE1	LYS_228@HZ3	LYS_228@NZ	578834	0.1219	2.7817	156.329
GLU_393@OE2	GLY_400@H	GLY_400@N	578775	0.1218	2.8544	157.217
ASN_226@OD1	ARG_230@HH11	ARG_230@NH1	578435	0.1218	2.8326	155.687
ARG_392@O	SER_396@HG	SER_396@OG	578395	0.1218	2.7462	161.535
GLU_225@OE1	LYS_228@HZ2	LYS_228@NZ	576628	0.1214	2.7814	156.205
HIE_443@O	ASP_447@H	ASP_447@N	575385	0.1211	2.8761	152.977
ASP_496@O	TYR_499@H	TYR_499@N	573037	0.1206	2.8966	154.75
ASP_200@OD1	ASN_226@HD22	ASN_226@ND2	572643	0.1206	2.8403	159.603
ASN_178@OD1	TRP_181@H	TRP_181@N	570464	0.1201	2.881	160.042
ASP_278@OD1	LYS_282@HZ3	LYS_282@NZ	568955	0.1198	2.7897	155.713
GLN_338@OE1	GLN_338@H	GLN_338@N	568754	0.1197	2.8619	147.565
GLN_428@OE1	TRP_432@HE1	TRP_432@NE1	566597	0.1193	2.8541	152.516
GLU_316@OE2	VAL_323@H	VAL_323@N	563560	0.1186	2.8537	161.783
GLU_135@OE1	ARG_134@HE	ARG_134@NE	562758	0.1185	2.8297	153.555
ASP_278@OD2	LYS_282@HZ3	LYS_282@NZ	560094	0.1179	2.7903	155.644
SER_144@O	ARG_194@HH22	ARG_194@NH2	559427	0.1178	2.8083	153.338
GLU_434@OE1	ARG_433@HH21	ARG_433@NH2	558672	0.1176	2.809	153.067
LEU_246@O	SER_249@HG	SER_249@OG	557848	0.1174	2.7048	163.036
ASN_91@OD1	ALA_93@H	ALA_93@N	557764	0.1174	2.8861	153.913
ASP_278@OD1	LYS_282@HZ1	LYS_282@NZ	557003	0.1173	2.7894	155.711
THR_340@O	ASN_435@HD22	ASN_435@ND2	554519	0.1167	2.8222	152.647
ASP_278@OD2	LYS_282@HZ1	LYS_282@NZ	554188	0.1167	2.7896	155.778
ASP_83@O	ASP_86@H	ASP_86@N	554168	0.1167	2.8803	149.979
ASP_278@OD2	LYS_282@HZ2	LYS_282@NZ	553622	0.1166	2.79	155.722
ASP_278@OD1	LYS_282@HZ2	LYS_282@NZ	552636	0.1163	2.79	155.636
GLU_58@OE2	ARG_66@HH21	ARG_66@NH2	551629	0.1161	2.7907	155.445
ASP_333@OD2	ARG_277@HH21	ARG_277@NH2	550379	0.1159	2.8177	153.567
ILE_240@O	GLY_244@H	GLY_244@N	548405	0.1155	2.8639	151.625
GLU_225@OE2	LYS_228@HZ3	LYS_228@NZ	548000	0.1154	2.7822	156.145
THR_283@O	TYR_285@H	TYR_285@N	546719	0.1151	2.8194	145.203
GLU_316@OE1	VAL_323@H	VAL_323@N	546571	0.1151	2.8564	162.236
GLU_434@OE2	GLN_12@HE22	GLN_12@NE2	546345	0.115	2.818	160.889
ASP_333@OD1	ARG_277@HH21	ARG_277@NH2	545555	0.1149	2.8193	153.498
GLU_58@OE2	VAL_65@H	VAL_65@N	545464	0.1148	2.8486	161.448
GLU_225@OE2	LYS_228@HZ1	LYS_228@NZ	544646	0.1147	2.783	156.099
GLU_434@OE2	ARG_433@HH21	ARG_433@NH2	544478	0.1146	2.8091	152.614
SER_401@O	GLY_405@H	GLY_405@N	544183	0.1146	2.8834	156.145
ASP_83@OD2	ARG_67@HH22	ARG_67@NH2	542735	0.1143	2.8177	158.376
GLU_225@OE2	LYS_228@HZ2	LYS_228@NZ	541133	0.1139	2.7827	156.14
GLY_352@O	ASN_349@HD21	ASN_349@ND2	540666	0.1138	2.8431	163.606
GLU_233@OE2	ARG_230@HH21	ARG_230@NH2	535743	0.1128	2.8079	155.981
THR_25@O	TYR_27@H	TYR_27@N	534566	0.1125	2.8149	145.101
GLY_78@O	ASN_81@H	ASN_81@N	532776	0.1122	2.8853	154.278
SER_171@O	ARG_175@H	ARG_175@N	531233	0.1118	2.8814	155.044
LEU_504@O	SER_507@H	SER_507@N	529340	0.1114	2.8892	154.985
ASP_333@OD1	SER_335@HG	SER_335@OG	528662	0.1113	2.6886	162.744
ASP_448@OD2	LEU_450@H	LEU_450@N	528190	0.1112	2.8836	162.394
GLU_316@OE2	ARG_325@HH21	ARG_325@NH2	527992	0.1112	2.809	159.958
GLU_64@OE2	ARG_67@H	ARG_67@N	527919	0.1111	2.8425	162.186
GLU_31@OE2	ARG_32@H	ARG_32@N	527698	0.1111	2.8551	154.879
GLU_31@OE1	ARG_32@H	ARG_32@N	526701	0.1109	2.8551	154.782
GLU_97@OE2	SER_249@HG	SER_249@OG	522638	0.11	2.6752	163.791
GLU_233@OE1	ARG_230@HH21	ARG_230@NH2	521938	0.1099	2.808	155.78
GLN_150@OE1	GLY_147@H	GLY_147@N	520724	0.1096	2.8334	151.361
GLU_393@OE2	SER_401@H	SER_401@N	520174	0.1095	2.8784	160.43
LYS_512@O	GLN_358@HE21	GLN_358@NE2	519750	0.1094	2.8423	159.774
GLN_80@OE1	ASP_83@H	ASP_83@N	518370	0.1091	2.8623	160.385
LEU_490@O	SER_493@H	SER_493@N	517653	0.109	2.8917	154.684
ASN_91@O	GLY_94@H	GLY_94@N	514287	0.1083	2.8868	153.124
PRO_85@O	ASN_88@H	ASN_88@N	513922	0.1082	2.8899	150.209
ALA_154@O	ALA_158@H	ALA_158@N	513318	0.1081	2.881	145.696
GLU_316@OE1	ARG_325@HH21	ARG_325@NH2	512846	0.108	2.8093	159.876
GLU_145@OE1	ARG_175@HH11	ARG_175@NH1	509364	0.1072	2.7853	158.984
GLU_135@OE2	SER_139@HG	SER_139@OG	508523	0.1071	2.6235	165.484
ASN_88@OD1	CYS_90@H	CYS_90@N	508413	0.107	2.8779	156.977
ARG_427@O	SER_3@HG	SER_3@OG	507762	0.1069	2.8051	153.315
ASP_239@O	ASP_243@H	ASP_243@N	506875	0.1067	2.8846	161.509
PHE_112@O	LEU_115@H	LEU_115@N	506423	0.1066	2.9023	149.584
PHE_234@O	VAL_237@H	VAL_237@N	505932	0.1065	2.904	155.478
LEU_136@O	SER_139@H	SER_139@N	505884	0.1065	2.8951	149.073
ASP_447@OD1	TYR_451@HH	TYR_451@OH	503009	0.1059	2.6375	164.435
GLU_271@OE2	ARG_175@HH21	ARG_175@NH2	502312	0.1057	2.785	154.749
GLU_58@OE1	VAL_65@H	VAL_65@N	502211	0.1057	2.8491	162.017
GLU_424@OE1	GLN_428@HE22	GLN_428@NE2	501904	0.1057	2.8206	161.345
ASP_341@O	ASP_344@H	ASP_344@N	501888	0.1057	2.8849	149.172
GLU_393@OE2	ARG_9@HH22	ARG_9@NH2	501216	0.1055	2.8106	157.572
SER_79@O	SER_84@H	SER_84@N	497174	0.1047	2.8561	157.734
PHE_370@O	LEU_373@H	LEU_373@N	495254	0.1043	2.9012	149.2
LEU_489@O	PHE_492@H	PHE_492@N	493682	0.1039	2.8962	154.727
LYS_282@O	ASN_76@HD21	ASN_76@ND2	492539	0.1037	2.8602	160.689
ASP_447@O	SER_3@HG	SER_3@OG	491558	0.1035	2.7571	163.783
GLU_393@O	SER_397@H	SER_397@N	491520	0.1035	2.8638	156.424
ASP_190@O	ARG_194@HH21	ARG_194@NH2	487547	0.1026	2.8221	157.645
ASN_339@OD1	SER_342@H	SER_342@N	487470	0.1026	2.8623	161.106
GLY_70@O	ARG_66@H	ARG_66@N	486085	0.1023	2.8816	159.636
SER_337@O	SER_77@H	SER_77@N	485895	0.1023	2.8383	156.24
THR_5@O	ARG_427@HH11	ARG_427@NH1	484746	0.1021	2.8232	158.772
GLU_393@OE1	ARG_392@HH21	ARG_392@NH2	484223	0.1019	2.7925	153.736
GLN_80@O	SER_84@HG	SER_84@OG	482060	0.1015	2.7411	160.982
SER_171@O	ARG_175@HH21	ARG_175@NH2	481899	0.1015	2.8402	148.619
GLU_271@OE1	ARG_267@HH21	ARG_267@NH2	481184	0.1013	2.8111	151.545
GLU_322@OE2	ARG_324@HH22	ARG_324@NH2	480381	0.1011	2.8066	155.683
GLU_64@OE2	ARG_66@H	ARG_66@N	480008	0.1011	2.8336	156.738
ALA_7@O	GLN_12@HE21	GLN_12@NE2	479291	0.1009	2.8644	155.763
ASN_334@O	SER_337@HG	SER_337@OG	478105	0.1007	2.7576	159.119
ASP_20@OD2	LYS_24@HZ1	LYS_24@NZ	476000	0.1002	2.8006	155.731
GLN_100@O	TRP_250@HE1	TRP_250@NE1	475770	0.1002	2.8677	151.413
PRO_85@O	VAL_89@H	VAL_89@N	475682	0.1001	2.8585	158.471
ASP_20@OD2	LYS_24@HZ3	LYS_24@NZ	475551	0.1001	2.8003	155.75
ASP_75@O	ASN_339@H	ASN_339@N	474605	0.0999	2.864	160.896
ASP_20@OD1	LYS_24@HZ1	LYS_24@NZ	474532	0.0999	2.8005	155.761
ASP_189@OD1	SER_191@H	SER_191@N	474471	0.0999	2.8762	157.021
ASP_20@OD1	LYS_24@HZ2	LYS_24@NZ	473193	0.0996	2.8006	155.732
LEU_490@O	ASN_494@H	ASN_494@N	472939	0.0996	2.8775	153.589
ASP_20@OD1	LYS_24@HZ3	LYS_24@NZ	472016	0.0994	2.8004	155.715
ASP_20@OD2	LYS_24@HZ2	LYS_24@NZ	471512	0.0993	2.8006	155.747
GLU_157@OE1	SER_264@HG	SER_264@OG	471396	0.0992	2.6307	164.45
GLU_135@OE1	SER_139@HG	SER_139@OG	471248	0.0992	2.6263	165.363
ALA_4@O	ALA_7@H	ALA_7@N	470785	0.0991	2.8813	152.37
GLU_58@OE2	ARG_66@HE	ARG_66@NE	470253	0.099	2.826	155.076
GLU_271@OE1	TRP_172@HE1	TRP_172@NE1	470238	0.099	2.8156	159.069
GLN_431@O	ASN_435@HD22	ASN_435@ND2	469708	0.0989	2.8383	159.936
GLU_322@OE1	ARG_324@HH22	ARG_324@NH2	468606	0.0987	2.807	155.501
SER_143@O	SER_146@H	SER_146@N	465786	0.0981	2.9009	153.401
LEU_74@O	ASN_76@H	ASN_76@N	465689	0.098	2.8784	148.461
THR_46@O	VAL_50@H	VAL_50@N	465303	0.098	2.918	161.564
GLU_166@O	GLN_170@HE22	GLN_170@NE2	465203	0.0979	2.8368	162.21
GLU_415@OE2	LYS_382@HZ3	LYS_382@NZ	464128	0.0977	2.7687	159.01
ASP_333@OD1	GLN_80@HE22	GLN_80@NE2	462095	0.0973	2.806	160.901
ILE_498@O	GLY_502@H	GLY_502@N	461994	0.0973	2.8667	151.709
GLU_415@OE1	LYS_382@HZ3	LYS_382@NZ	461116	0.0971	2.7687	158.95
PHE_426@O	SER_429@HG	SER_429@OG	460447	0.0969	2.7622	158.88
GLU_415@OE1	LYS_382@HZ2	LYS_382@NZ	460014	0.0968	2.7687	158.946
GLU_271@OE1	ARG_267@HE	ARG_267@NE	459911	0.0968	2.7995	154.582
GLU_145@OE2	ARG_175@HH11	ARG_175@NH1	457350	0.0963	2.7838	159.146
GLN_150@OE1	GLN_150@H	GLN_150@N	457122	0.0962	2.8466	146.447
GLY_336@O	THR_340@H	THR_340@N	456655	0.0961	2.8745	156.102
ASP_92@O	LEU_246@H	LEU_246@N	456173	0.096	2.8806	162.363
GLU_434@OE1	TYR_11@HH	TYR_11@OH	454287	0.0956	2.672	163.622
GLU_415@OE2	LYS_382@HZ1	LYS_382@NZ	454084	0.0956	2.7688	159.043
GLU_289@OE2	ARG_290@H	ARG_290@N	453954	0.0956	2.8565	154.443
LYS_195@O	GLY_199@H	GLY_199@N	453380	0.0954	2.9036	152.854
GLU_415@OE2	LYS_382@HZ2	LYS_382@NZ	453184	0.0954	2.7691	159.024
CYS_90@O	GLY_94@H	GLY_94@N	452494	0.0953	2.8614	157.178
GLU_271@OE2	ARG_267@HE	ARG_267@NE	452075	0.0952	2.7983	154.923
GLU_289@OE1	ARG_290@H	ARG_290@N	452059	0.0952	2.8571	154.459
GLU_415@OE1	LYS_382@HZ1	LYS_382@NZ	451457	0.095	2.7688	158.95
GLU_64@OE1	SER_79@HG	SER_79@OG	451445	0.095	2.672	164.113
GLU_157@OE2	SER_264@HG	SER_264@OG	451156	0.095	2.6298	164.532
ARG_433@O	ASN_436@H	ASN_436@N	448623	0.0944	2.9006	155.8
ASP_83@OD1	ARG_67@HH22	ARG_67@NH2	448251	0.0944	2.8188	159.994
GLU_64@OE2	ARG_32@HH22	ARG_32@NH2	448142	0.0943	2.8055	157.322
ASP_189@OD2	SER_191@H	SER_191@N	447829	0.0943	2.8752	156.606
GLU_271@OE2	ARG_267@HH21	ARG_267@NH2	446474	0.094	2.8125	151.351
LEU_510@O	VAL_513@H	VAL_513@N	445926	0.0939	2.8966	156.179
ALA_398@O	SER_401@HG	SER_401@OG	445171	0.0937	2.7302	160.589
ASP_200@OD2	ASN_226@HD22	ASN_226@ND2	443495	0.0934	2.8402	159.104
MET_1@O	SER_449@H	SER_449@N	442949	0.0933	2.8876	161.68
GLU_491@OE1	ARG_488@HE	ARG_488@NE	442905	0.0932	2.8253	157.199
GLU_393@O	SER_396@HG	SER_396@OG	442085	0.0931	2.6983	162.061
ASN_81@O	TRP_174@HE1	TRP_174@NE1	441199	0.0929	2.8592	156.581
SER_404@O	GLN_408@HE22	GLN_408@NE2	439908	0.0926	2.8527	159.259
ALA_140@O	SER_143@H	SER_143@N	439610	0.0925	2.8901	148.015
ASP_83@OD1	ARG_67@HH12	ARG_67@NH1	439513	0.0925	2.7904	155.039
ASP_448@O	TYR_451@H	TYR_451@N	439226	0.0925	2.8963	148.948
GLN_431@O	GLU_434@H	GLU_434@N	439037	0.0924	2.8903	151.757
ASP_447@OD2	SER_3@HG	SER_3@OG	438365	0.0923	2.6528	162.748
GLU_157@OE2	LYS_124@HZ2	LYS_124@NZ	438278	0.0923	2.775	158.785
ASP_448@O	LEU_450@H	LEU_450@N	437003	0.092	2.8366	149.219
ASP_341@OD1	ARG_19@HH22	ARG_19@NH2	435231	0.0916	2.8051	158.426
GLU_491@OE2	ARG_488@HE	ARG_488@NE	435175	0.0916	2.8251	157.313
VAL_255@O	TRP_221@HE1	TRP_221@NE1	433119	0.0912	2.8449	154.416
GLY_61@O	ASN_339@HD21	ASN_339@ND2	432434	0.091	2.8495	160.085
LEU_442@O	HIE_445@H	HIE_445@N	431948	0.0909	2.9021	151.541
GLU_157@OE2	LYS_124@HZ3	LYS_124@NZ	431349	0.0908	2.7749	158.759
ASP_341@OD2	ARG_19@HH22	ARG_19@NH2	429930	0.0905	2.8042	157.831
ASP_447@OD2	TYR_451@HH	TYR_451@OH	429630	0.0904	2.638	164.386
GLU_64@OE1	ARG_32@HH12	ARG_32@NH1	429588	0.0904	2.7997	157.728
PRO_179@O	ILE_182@H	ILE_182@N	428196	0.0901	2.8873	147.089
LEU_332@O	SER_335@HG	SER_335@OG	427788	0.0901	2.7349	159.839
ASP_447@O	LEU_450@H	LEU_450@N	425728	0.0896	2.8691	157.793
ASP_190@OD1	SER_191@HG	SER_191@OG	425155	0.0895	2.7086	164.528
ASN_178@OD1	MET_180@H	MET_180@N	424384	0.0893	2.865	153.28
ASP_447@OD1	GLY_400@H	GLY_400@N	423153	0.0891	2.8536	158.255
GLU_157@OE2	LYS_124@HZ1	LYS_124@NZ	423115	0.0891	2.7746	158.664
ASP_333@OD1	ARG_277@HE	ARG_277@NE	422223	0.0889	2.8121	155.454
HIE_185@O	LEU_188@H	LEU_188@N	422025	0.0888	2.8934	153.454
LEU_394@O	SER_397@H	SER_397@N	421733	0.0888	2.8919	152.572
GLY_502@O	PHE_505@H	PHE_505@N	419452	0.0883	2.8913	153.5
GLU_13@OE2	ARG_433@HH22	ARG_433@NH2	418614	0.0881	2.7855	161.151
ALA_327@O	TYR_330@HH	TYR_330@OH	418610	0.0881	2.7489	162.769
GLU_434@OE2	TYR_11@HH	TYR_11@OH	416363	0.0877	2.6715	163.649
GLU_393@O	SER_396@H	SER_396@N	414937	0.0874	2.8998	152.043
ALA_345@O	ASN_349@HD22	ASN_349@ND2	414858	0.0873	2.8301	160.275
ASP_341@OD1	ASN_435@HD21	ASN_435@ND2	413606	0.0871	2.8341	158.88
GLU_145@OE2	ARG_175@HE	ARG_175@NE	413112	0.087	2.8356	158.127
LYS_453@O	GLY_457@H	GLY_457@N	412534	0.0868	2.9059	152.746
GLU_355@OE2	TRP_508@HE1	TRP_508@NE1	411597	0.0867	2.8027	162.385
ALA_69@O	ARG_32@HE	ARG_32@NE	411509	0.0866	2.8489	151.907
ASN_349@OD1	ALA_351@H	ALA_351@N	411152	0.0866	2.8919	156.299
SER_335@O	ASN_339@HD22	ASN_339@ND2	410396	0.0864	2.8384	160.723
ASN_178@O	ILE_182@H	ILE_182@N	409035	0.0861	2.91	163.107
LEU_504@O	GLN_116@HE22	GLN_116@NE2	408773	0.0861	2.8266	155.649
SER_146@O	AP1_148@H	AP1_148@N	408749	0.0861	2.8689	147.372
GLU_52@OE2	ARG_9@HH21	ARG_9@NH2	407791	0.0859	2.7938	152.531
GLU_424@OE2	GLN_428@HE22	GLN_428@NE2	407705	0.0858	2.8155	161.019
GLN_100@OE1	LYS_228@HZ3	LYS_228@NZ	407338	0.0858	2.8042	151.67
GLU_355@OE1	CYS_348@H	CYS_348@N	407125	0.0857	2.8638	157.074
ASP_189@OD2	TYR_193@HH	TYR_193@OH	406960	0.0857	2.6376	163.398
GLN_100@OE1	LYS_228@HZ2	LYS_228@NZ	405904	0.0855	2.8044	151.646
GLU_176@OE1	SER_337@HG	SER_337@OG	405242	0.0853	2.6715	163.756
ASN_88@O	ASN_91@H	ASN_91@N	404642	0.0852	2.8966	154.454
ASP_253@O	GLN_100@HE21	GLN_100@NE2	404182	0.0851	2.8481	158.622
GLU_393@OE1	ARG_9@HH22	ARG_9@NH2	403166	0.0849	2.8156	155.853
ASP_333@OD2	ARG_277@HE	ARG_277@NE	403042	0.0849	2.8128	154.768
GLN_80@OE1	GLN_80@H	GLN_80@N	402244	0.0847	2.8481	150.174
GLU_52@OE1	ARG_9@HH21	ARG_9@NH2	402240	0.0847	2.7944	152.604
GLU_369@OE2	LYS_475@HZ2	LYS_475@NZ	402219	0.0847	2.796	157.628
SER_249@O	GLN_100@HE22	GLN_100@NE2	401475	0.0845	2.8448	160.606
GLN_100@OE1	LYS_228@HZ1	LYS_228@NZ	401374	0.0845	2.8043	151.652
LEU_74@O	SER_342@HG	SER_342@OG	400331	0.0843	2.7249	161.503
GLU_13@OE1	ARG_433@HH22	ARG_433@NH2	400154	0.0842	2.7898	160.129
GLU_369@OE2	LYS_475@HZ1	LYS_475@NZ	399909	0.0842	2.7958	157.631
ASN_76@O	ASN_339@HD22	ASN_339@ND2	399556	0.0841	2.8571	159.724
ASN_339@OD1	ASP_341@H	ASP_341@N	399523	0.0841	2.8732	152.778
GLN_431@OE1	ALA_4@H	ALA_4@N	397708	0.0837	2.8696	152.277
GLU_176@OE1	GLN_173@HE21	GLN_173@NE2	395021	0.0832	2.8358	161.431
GLU_145@OE1	ARG_175@HE	ARG_175@NE	394692	0.0831	2.8363	157.944
GLU_145@OE2	ARG_175@HH22	ARG_175@NH2	394000	0.0829	2.8044	156.086
GLU_52@OE2	ARG_9@HE	ARG_9@NE	393545	0.0829	2.811	153.934
GLU_355@OE1	TRP_508@HE1	TRP_508@NE1	392905	0.0827	2.803	162.539
GLU_38@OE1	ARG_37@HH22	ARG_37@NH2	392725	0.0827	2.8052	156.072
GLU_369@OE2	LYS_475@HZ3	LYS_475@NZ	392464	0.0826	2.7967	157.587
ASP_238@OD2	ASP_239@H	ASP_239@N	391588	0.0824	2.8281	144.701
ASP_470@OD2	ALA_473@H	ALA_473@N	390705	0.0823	2.8992	162.72
ASP_83@OD1	THR_82@HG1	THR_82@OG1	390694	0.0823	2.7022	164.629
ASN_334@O	GLN_338@H	GLN_338@N	390190	0.0821	2.8806	161.745
ASP_333@OD1	ARG_67@HH11	ARG_67@NH1	388957	0.0819	2.8416	152.204
GLU_233@OE1	ARG_230@HE	ARG_230@NE	388795	0.0819	2.8272	157.105
ASN_81@OD1	ASN_177@HD22	ASN_177@ND2	388355	0.0818	2.8389	160.058
GLU_52@OE1	ARG_9@HE	ARG_9@NE	388341	0.0818	2.8118	153.959
GLN_12@OE1	ARG_433@HH21	ARG_433@NH2	388297	0.0817	2.842	147.143
GLU_491@OE2	TYR_451@HH	TYR_451@OH	387736	0.0816	2.6953	162.413
GLN_441@O	SER_444@HG	SER_444@OG	387695	0.0816	2.7195	161.068
ALA_398@O	SER_401@H	SER_401@N	386871	0.0814	2.8992	156.073
PHE_370@O	GLN_374@HE22	GLN_374@NE2	386061	0.0813	2.8368	158.864
GLU_393@OE2	ARG_392@HH21	ARG_392@NH2	384938	0.081	2.7976	153.394
ILE_59@O	ASN_81@HD22	ASN_81@ND2	384803	0.081	2.8376	161.411
PHE_242@O	PHE_247@H	PHE_247@N	384409	0.0809	2.8949	158.666
LEU_291@O	ILE_329@H	ILE_329@N	384407	0.0809	2.8785	155.505
GLU_369@OE1	LYS_475@HZ1	LYS_475@NZ	384012	0.0808	2.7966	157.688
LEU_252@O	ASP_256@H	ASP_256@N	383615	0.0808	2.8671	159.159
GLU_483@OE2	GLN_487@HE22	GLN_487@NE2	383535	0.0807	2.8331	161.593
GLU_369@OE1	LYS_475@HZ2	LYS_475@NZ	383400	0.0807	2.7968	157.763
ARG_9@O	GLU_13@H	GLU_13@N	382525	0.0805	2.8925	159.673
TRP_430@O	GLU_434@H	GLU_434@N	381882	0.0804	2.8988	163.488
PRO_26@O	ASN_28@H	ASN_28@N	380628	0.0801	2.8523	147.081
GLU_369@OE1	LYS_475@HZ3	LYS_475@NZ	378961	0.0798	2.7971	157.697
ASP_470@OD1	ALA_473@H	ALA_473@N	377349	0.0794	2.8993	162.768
GLU_491@OE1	TYR_451@HH	TYR_451@OH	376781	0.0793	2.6958	162.409
GLY_142@O	SER_146@H	SER_146@N	375762	0.0791	2.8944	156.172
GLU_233@OE2	ARG_230@HE	ARG_230@NE	375422	0.079	2.8278	156.888
GLU_196@O	GLY_199@H	GLY_199@N	374129	0.0788	2.8706	144.121
GLU_176@OE2	SER_337@HG	SER_337@OG	374054	0.0787	2.6708	163.72
SER_79@OG	ASN_177@HD21	ASN_177@ND2	372441	0.0784	2.8986	161.761
ALA_327@O	ARG_290@HH11	ARG_290@NH1	372261	0.0784	2.834	156.589
GLU_415@O	HIE_418@H	HIE_418@N	372176	0.0784	2.885	151.955
ASP_212@OD2	ALA_215@H	ALA_215@N	372099	0.0783	2.8997	162.829
ILE_281@O	SER_79@HG	SER_79@OG	371083	0.0781	2.7955	154.104
ASP_341@OD2	SER_337@HG	SER_337@OG	370629	0.078	2.6929	159.494
GLU_64@OE2	SER_79@HG	SER_79@OG	369478	0.0778	2.6723	164.172
GLU_390@OE2	ARG_452@HH12	ARG_452@NH1	369147	0.0777	2.7903	163.941
THR_5@OG1	GLN_12@HE22	GLN_12@NE2	368124	0.0775	2.8958	160.403
ASP_212@OD1	ALA_215@H	ALA_215@N	367655	0.0774	2.8995	162.841
ASP_238@OD1	ASP_239@H	ASP_239@N	367187	0.0773	2.8279	144.732
GLU_38@OE2	ARG_37@HH22	ARG_37@NH2	365835	0.077	2.8078	155.452
GLU_378@OE1	ARG_377@HH21	ARG_377@NH2	364139	0.0767	2.8098	154.309
GLY_142@O	SER_146@HG	SER_146@OG	363136	0.0764	2.795	162.17
ALA_345@O	ASN_349@H	ASN_349@N	362162	0.0762	2.8759	157.552
LEU_131@O	ARG_134@H	ARG_134@N	362006	0.0762	2.8925	144.554
GLU_36@OE1	ARG_51@HH11	ARG_51@NH1	361960	0.0762	2.7926	157.536
GLU_403@OE2	HIE_443@HE2	HIE_443@NE2	361757	0.0762	2.8395	156.98
GLU_225@OE2	GLN_229@HE22	GLN_229@NE2	359709	0.0757	2.826	161.751
GLU_233@O	ASN_236@H	ASN_236@N	358503	0.0755	2.9006	150.672
GLU_166@OE2	ARG_169@HH11	ARG_169@NH1	358205	0.0754	2.7988	156.432
ALA_93@O	GLU_97@H	GLU_97@N	357960	0.0754	2.8886	160.811
GLU_132@OE1	SER_144@HG	SER_144@OG	357229	0.0752	2.6476	163.983
GLU_64@OE2	ARG_67@HE	ARG_67@NE	356878	0.0751	2.8142	154.196
LEU_252@O	VAL_255@H	VAL_255@N	355339	0.0748	2.888	156.242
ASP_496@OD1	ASP_497@H	ASP_497@N	355255	0.0748	2.8228	144.502
GLU_13@OE1	SER_402@HG	SER_402@OG	355195	0.0748	2.701	164.274
GLU_36@OE2	ARG_51@HH11	ARG_51@NH1	354154	0.0746	2.7934	157.536
GLU_157@OE1	LYS_124@HZ2	LYS_124@NZ	353751	0.0745	2.7753	158.213
GLU_111@OE2	LYS_217@HZ2	LYS_217@NZ	353106	0.0743	2.7999	157.141
GLU_111@OE1	LYS_217@HZ1	LYS_217@NZ	352442	0.0742	2.8	157.079
GLU_64@OE2	ARG_67@HH21	ARG_67@NH2	352396	0.0742	2.8044	151.466
GLU_111@OE1	LYS_217@HZ3	LYS_217@NZ	352360	0.0742	2.8003	157.108
GLU_434@OE2	ARG_9@HH21	ARG_9@NH2	351653	0.074	2.7724	160.568
GLU_157@OE1	LYS_124@HZ1	LYS_124@NZ	351456	0.074	2.7756	158.242
GLU_111@OE1	LYS_217@HZ2	LYS_217@NZ	350744	0.0738	2.8004	157.101
GLU_111@OE2	LYS_217@HZ3	LYS_217@NZ	350603	0.0738	2.7997	157.171
GLU_111@OE2	LYS_217@HZ1	LYS_217@NZ	350041	0.0737	2.7998	157.097
HIE_185@O	SER_143@H	SER_143@N	349912	0.0737	2.8503	154.41
ASP_83@OD2	THR_82@HG1	THR_82@OG1	349743	0.0736	2.6998	164.691
ASP_344@O	CYS_348@H	CYS_348@N	349044	0.0735	2.8802	160.516
GLU_393@OE1	ARG_9@HH11	ARG_9@NH1	348284	0.0733	2.8062	158.399
ASP_333@OD2	ARG_67@HH11	ARG_67@NH1	347883	0.0732	2.8499	152.775
ALA_7@O	ARG_9@H	ARG_9@N	347793	0.0732	2.8635	146.683
ARG_66@O	ALA_69@H	ALA_69@N	347666	0.0732	2.8884	155.264
ASP_496@OD2	ASP_497@H	ASP_497@N	347132	0.0731	2.8245	144.47
LEU_504@O	SER_507@HG	SER_507@OG	346911	0.073	2.7201	160.329
ASN_76@O	GLN_431@HE22	GLN_431@NE2	346819	0.073	2.8364	155.339
GLU_434@OE1	LYS_60@HZ2	LYS_60@NZ	346509	0.0729	2.7786	156.867
ASP_243@OD1	ARG_267@HH12	ARG_267@NH1	346033	0.0728	2.8196	157.469
HIE_443@ND1	ARG_433@HH11	ARG_433@NH1	345849	0.0728	2.9117	155.578
GLU_157@OE1	LYS_124@HZ3	LYS_124@NZ	345775	0.0728	2.7758	158.26
ASN_484@OD1	ARG_488@HH11	ARG_488@NH1	345764	0.0728	2.8298	153.911
GLU_491@OE1	ARG_488@HH11	ARG_488@NH1	345579	0.0728	2.7949	158.157
GLU_157@OE2	THR_263@HG1	THR_263@OG1	344061	0.0724	2.7407	160.145
GLU_434@OE1	LYS_60@HZ1	LYS_60@NZ	343889	0.0724	2.7779	156.85
GLU_378@OE2	ARG_377@HH21	ARG_377@NH2	343811	0.0724	2.8109	154.226
ASP_190@OD1	SER_143@HG	SER_143@OG	343473	0.0723	2.6603	163.58
GLU_393@OE1	ARG_392@HE	ARG_392@NE	343134	0.0722	2.8356	151.632
ASP_243@OD1	ARG_267@HH22	ARG_267@NH2	342969	0.0722	2.8165	157.737
GLU_157@OE1	SER_264@H	SER_264@N	342573	0.0721	2.8508	161.283
ASP_447@OD2	GLY_400@H	GLY_400@N	342395	0.0721	2.8496	158.24
LEU_446@O	ARG_452@HE	ARG_452@NE	342378	0.0721	2.8404	157.254
GLU_434@OE1	LYS_60@HZ3	LYS_60@NZ	341677	0.0719	2.7776	156.854
GLU_403@OE1	ARG_452@HH11	ARG_452@NH1	341364	0.0719	2.8433	150.358
ALA_93@O	LYS_260@H	LYS_260@N	341027	0.0718	2.8366	156.803
ASP_333@OD2	SER_335@H	SER_335@N	340658	0.0717	2.8828	158.913
ASP_333@OD1	SER_335@H	SER_335@N	340044	0.0716	2.8823	158.71
GLU_393@OE2	SER_397@HG	SER_397@OG	338397	0.0712	2.6442	165.432
ASP_238@OD2	HIE_187@HE2	HIE_187@NE2	337968	0.0712	2.825	156.528
ASN_484@OD1	ARG_488@HH12	ARG_488@NH1	337585	0.0711	2.8254	155.719
GLU_483@OE1	GLN_487@HE22	GLN_487@NE2	337562	0.0711	2.833	161.628
GLU_294@OE2	ARG_309@HH11	ARG_309@NH1	337216	0.071	2.794	158.065
LEU_320@O	ASP_333@H	ASP_333@N	336796	0.0709	2.8969	153.61
GLU_13@OE2	SER_402@HG	SER_402@OG	336234	0.0708	2.6956	164.256
GLN_173@OE1	GLN_170@HE21	GLN_170@NE2	336035	0.0707	2.852	153.394
GLU_322@OE1	ARG_325@HE	ARG_325@NE	334866	0.0705	2.8152	154.887
LEU_446@O	ASP_448@H	ASP_448@N	334532	0.0704	2.8695	146.592
GLU_176@OE1	ARG_277@HH11	ARG_277@NH1	334180	0.0704	2.7749	155.535
ASP_238@OD1	PHE_242@H	PHE_242@N	333822	0.0703	2.8507	160.889
GLU_491@OE2	ARG_488@HH11	ARG_488@NH1	332919	0.0701	2.7956	158.157
ASP_341@OD2	ARG_19@HH12	ARG_19@NH1	332434	0.07	2.8215	157.712
ASN_435@OD1	GLN_431@HE22	GLN_431@NE2	332252	0.0699	2.8417	158.332
GLN_80@OE1	SER_84@HG	SER_84@OG	331832	0.0699	2.7431	159.936
GLU_157@OE2	SER_264@H	SER_264@N	330979	0.0697	2.8491	161.093
SER_402@O	GLY_405@H	GLY_405@N	330719	0.0696	2.8712	145.528
ASP_243@OD2	ARG_267@HH12	ARG_267@NH1	329707	0.0694	2.8194	157.46
GLU_289@OE1	ASN_286@HD22	ASN_286@ND2	329631	0.0694	2.8295	161.521
ALA_386@O	LEU_389@H	LEU_389@N	328613	0.0692	2.9038	151.073
GLU_355@OE1	ASN_349@H	ASN_349@N	327834	0.069	2.8859	162.984
ASP_243@OD2	ARG_267@HH22	ARG_267@NH2	327804	0.069	2.8131	157.714
GLY_244@O	THR_263@H	THR_263@N	327729	0.069	2.8654	159.138
GLU_289@OE2	ASN_286@HD22	ASN_286@ND2	326642	0.0688	2.8298	161.593
LEU_33@O	ILE_71@H	ILE_71@N	325532	0.0685	2.8828	153.707
ALA_40@O	ASP_44@H	ASP_44@N	324662	0.0683	2.8615	142.903
ILE_280@O	THR_283@H	THR_283@N	324650	0.0683	2.8977	150.292
ASP_189@OD1	ASP_190@H	ASP_190@N	324631	0.0683	2.8327	144.691
ALA_351@O	PHE_354@H	PHE_354@N	324402	0.0683	2.8827	150.609
CYS_90@O	ALA_93@H	ALA_93@N	324307	0.0683	2.8946	153.703
GLU_390@OE1	ARG_452@HH12	ARG_452@NH1	323826	0.0682	2.7872	164.061
GLU_233@OE2	TYR_193@HH	TYR_193@OH	323801	0.0682	2.7045	161.831
LEU_387@O	GLU_390@H	GLU_390@N	323689	0.0681	2.8861	148.261
PRO_141@O	SER_143@H	SER_143@N	323627	0.0681	2.8688	145.761
ASN_339@O	SER_342@HG	SER_342@OG	322317	0.0679	2.7358	161.385
GLN_431@OE1	THR_5@H	THR_5@N	321393	0.0677	2.8632	152.508
GLU_233@OE1	TYR_193@HH	TYR_193@OH	321259	0.0676	2.7049	161.795
GLU_225@OE1	GLN_229@HE22	GLN_229@NE2	320142	0.0674	2.8268	161.702
ASP_238@O	TYR_241@H	TYR_241@N	320027	0.0674	2.895	150.862
ASP_341@OD1	ARG_19@HH12	ARG_19@NH1	319833	0.0673	2.8209	156.649
SER_342@O	ASN_346@HD22	ASN_346@ND2	319709	0.0673	2.8378	160.385
ASP_341@OD1	SER_337@HG	SER_337@OG	319658	0.0673	2.6898	163.045
LEU_446@O	ARG_488@HH21	ARG_488@NH2	319626	0.0673	2.8416	150.072
TYR_499@O	GLN_358@HE22	GLN_358@NE2	318073	0.067	2.8288	161.028
ALA_298@O	ASP_302@H	ASP_302@N	317849	0.0669	2.8631	143.534
LEU_510@O	ASP_514@H	ASP_514@N	317304	0.0668	2.8702	160.913
ASP_92@O	TYR_241@HH	TYR_241@OH	317243	0.0668	2.7216	162.205
GLU_434@OE1	ARG_9@HH21	ARG_9@NH2	317192	0.0668	2.7779	160.136
ASN_366@OD1	LYS_475@HZ1	LYS_475@NZ	316980	0.0667	2.8157	152.676
ASP_333@OD2	GLN_80@HE22	GLN_80@NE2	316436	0.0666	2.8056	161.255
PHE_112@O	GLN_116@HE22	GLN_116@NE2	315660	0.0665	2.835	157.189
GLU_294@OE1	GLU_294@H	GLU_294@N	315417	0.0664	2.8323	151.542
ASN_366@OD1	LYS_475@HZ3	LYS_475@NZ	315306	0.0664	2.815	152.667
ALA_7@O	ARG_9@HH11	ARG_9@NH1	315073	0.0663	2.8287	158.845
ASN_366@OD1	LYS_475@HZ2	LYS_475@NZ	315049	0.0663	2.8152	152.675
GLU_176@OE2	ARG_277@HH11	ARG_277@NH1	313558	0.066	2.7756	155.787
ASN_81@O	SER_84@HG	SER_84@OG	312939	0.0659	2.715	161.122
ARG_267@O	GLN_270@H	GLN_270@N	311854	0.0657	2.8781	150.062
ASN_76@O	ASN_81@HD22	ASN_81@ND2	311780	0.0656	2.8456	158.946
ALA_140@O	SER_144@HG	SER_144@OG	311090	0.0655	2.7545	161.94
ASP_341@OD2	ASN_435@HD21	ASN_435@ND2	310771	0.0654	2.8357	158.145
GLU_176@OE2	GLN_173@HE21	GLN_173@NE2	310710	0.0654	2.8378	161.023
GLU_294@OE1	ARG_309@HH11	ARG_309@NH1	310430	0.0654	2.794	157.907
ASP_447@OD1	SER_401@HG	SER_401@OG	310194	0.0653	2.7169	160.659
LEU_394@O	SER_397@HG	SER_397@OG	309263	0.0651	2.7558	157.174
ASP_75@OD2	ARG_19@HH11	ARG_19@NH1	308794	0.065	2.7863	152.663
ASP_248@O	TRP_250@H	TRP_250@N	308708	0.065	2.8579	146.759
ASN_484@OD1	TYR_451@HH	TYR_451@OH	307082	0.0646	2.753	161.942
ILE_276@O	LEU_279@H	LEU_279@N	307028	0.0646	2.8819	145.381
SER_507@O	LEU_504@H	LEU_504@N	306594	0.0645	2.8384	152.342
GLU_322@OE2	ARG_290@HH22	ARG_290@NH2	304600	0.0641	2.7951	157.98
GLU_133@OE1	ARG_134@HH21	ARG_134@NH2	304408	0.0641	2.8235	155.43
GLU_491@O	ASN_494@H	ASN_494@N	303193	0.0638	2.9093	154.597
GLU_132@OE2	SER_144@HG	SER_144@OG	302022	0.0636	2.6561	163.36
ASN_108@OD1	LYS_217@HZ3	LYS_217@NZ	301527	0.0635	2.8158	152.602
ASN_334@O	SER_337@H	SER_337@N	301276	0.0634	2.9037	155.248
GLU_294@OE2	GLU_294@H	GLU_294@N	301037	0.0634	2.8331	151.528
GLU_13@OE2	GLU_13@H	GLU_13@N	300706	0.0633	2.8317	147.795
ASP_238@OD1	HIE_187@HE2	HIE_187@NE2	300474	0.0633	2.8256	156.498
ASP_501@OD1	GLY_502@H	GLY_502@N	299724	0.0631	2.8178	145.808
GLU_393@OE2	ARG_392@HE	ARG_392@NE	299543	0.0631	2.8336	152.269
GLN_358@O	GLN_358@HE22	GLN_358@NE2	299302	0.063	2.8577	149.732
ASN_108@OD1	LYS_217@HZ1	LYS_217@NZ	299179	0.063	2.8157	152.599
GLU_271@OE2	TYR_245@HH	TYR_245@OH	299112	0.063	2.7099	161.931
THR_159@O	ASN_161@H	ASN_161@N	298872	0.0629	2.8924	145.071
HIE_185@O	ASP_189@H	ASP_189@N	298748	0.0629	2.8811	155.319
ASN_226@OD1	TYR_193@HH	TYR_193@OH	298256	0.0628	2.7701	160.911
ASN_339@O	SER_342@H	SER_342@N	297994	0.0627	2.9087	155.247
ASP_86@OD1	LYS_2@H	LYS_2@N	297662	0.0627	2.8322	154.184
SER_335@O	ASN_339@H	ASN_339@N	297590	0.0627	2.8822	156.704
ASN_108@OD1	LYS_217@HZ2	LYS_217@NZ	297438	0.0626	2.8158	152.609
PRO_343@O	VAL_347@H	VAL_347@N	297308	0.0626	2.8843	160.089
GLU_31@O	TYR_27@HH	TYR_27@OH	296159	0.0623	2.718	163.633
GLU_271@OE1	ARG_175@HH21	ARG_175@NH2	294525	0.062	2.8059	152.617
ASP_447@OD1	SER_449@H	SER_449@N	294515	0.062	2.8734	156.861
SER_444@O	SER_3@HG	SER_3@OG	294077	0.0619	2.7126	159.582
LEU_184@O	HIE_187@H	HIE_187@N	293058	0.0617	2.9076	151.602
GLU_271@OE2	ARG_175@HE	ARG_175@NE	292968	0.0617	2.8262	151.942
GLU_434@OE2	LYS_60@HZ1	LYS_60@NZ	292749	0.0616	2.7808	156.825
GLU_393@OE1	GLY_400@H	GLY_400@N	291950	0.0615	2.8765	155.377
GLU_434@OE2	LYS_60@HZ2	LYS_60@NZ	291863	0.0614	2.7813	156.838
PRO_251@O	VAL_255@H	VAL_255@N	291780	0.0614	2.8698	160.838
SER_337@O	THR_340@H	THR_340@N	290599	0.0612	2.8889	152.069
GLU_133@OE2	ARG_134@HH21	ARG_134@NH2	289406	0.0609	2.8248	154.69
LEU_301@O	VAL_303@H	VAL_303@N	289186	0.0609	2.8665	146.27
GLY_352@O	GLU_355@H	GLU_355@N	287835	0.0606	2.8942	149.282
ASP_86@O	CYS_90@H	CYS_90@N	286967	0.0604	2.8796	158.505
ASP_75@OD2	ARG_19@HH22	ARG_19@NH2	286387	0.0603	2.8015	150.606
GLU_271@OE1	TYR_245@HH	TYR_245@OH	286242	0.0603	2.7115	162.045
GLU_434@OE2	LYS_60@HZ3	LYS_60@NZ	285957	0.0602	2.7818	156.702
GLU_271@OE2	ARG_175@HH22	ARG_175@NH2	283859	0.0598	2.8039	158.461
ASN_76@O	GLN_80@H	GLN_80@N	282629	0.0595	2.9005	160.292
SER_337@O	GLY_78@H	GLY_78@N	282038	0.0594	2.8196	144.03
ASN_346@OD1	CYS_348@H	CYS_348@N	281827	0.0593	2.8877	156.607
ASP_190@OD2	SER_191@HG	SER_191@OG	281664	0.0593	2.7077	164.417
GLU_296@O	GLU_299@H	GLU_299@N	280196	0.059	2.8934	146.487
ASP_506@O	TRP_508@H	TRP_508@N	279944	0.0589	2.8555	146.997
ASP_243@O	ARG_267@HH22	ARG_267@NH2	279915	0.0589	2.807	152.202
ASP_86@OD1	LYS_260@H	LYS_260@N	279788	0.0589	2.8522	155.537
GLU_64@OE1	ARG_66@H	ARG_66@N	278563	0.0586	2.8445	156.912
GLU_13@OE1	GLU_13@H	GLU_13@N	278544	0.0586	2.8391	147.735
LYS_60@O	GLN_431@HE21	GLN_431@NE2	277582	0.0584	2.8674	160.904
GLU_135@O	SER_138@H	SER_138@N	277570	0.0584	2.8983	150.337
ASN_349@OD1	GLY_352@H	GLY_352@N	276683	0.0582	2.8576	150.247
GLU_434@OE1	GLN_431@HE22	GLN_431@NE2	276551	0.0582	2.8113	155.488
ASP_189@OD1	TYR_193@HH	TYR_193@OH	276461	0.0582	2.6346	163.418
ALA_257@O	ARG_214@HH12	ARG_214@NH1	274818	0.0579	2.8015	158.287
GLU_454@O	GLY_457@H	GLY_457@N	272930	0.0575	2.8771	142.959
TRP_508@O	LYS_512@H	LYS_512@N	272837	0.0574	2.8762	157.728
GLU_41@O	ASP_44@H	ASP_44@N	272825	0.0574	2.9101	147.487
PRO_399@O	ALA_4@H	ALA_4@N	272154	0.0573	2.8632	158.484
GLU_322@OE1	ARG_290@HH12	ARG_290@NH1	271621	0.0572	2.8036	158.853
SER_79@O	THR_82@H	THR_82@N	271347	0.0571	2.897	150.457
THR_417@O	ASN_419@H	ASN_419@N	270705	0.057	2.8838	144.757
ILE_413@O	ALA_416@H	ALA_416@N	270574	0.057	2.9115	146.06
ASP_190@OD2	SER_143@HG	SER_143@OG	270414	0.0569	2.6624	164.471
GLU_196@OE1	ARG_230@HH21	ARG_230@NH2	270309	0.0569	2.8082	157.757
THR_340@O	ASN_435@HD21	ASN_435@ND2	270172	0.0569	2.8361	157.208
GLU_289@O	TYR_285@HH	TYR_285@OH	269759	0.0568	2.7259	163.437
ILE_59@O	GLN_80@HE22	GLN_80@NE2	269446	0.0567	2.8474	159.678
GLU_271@OE2	HIE_187@HE2	HIE_187@NE2	269390	0.0567	2.825	158.166
GLU_271@OE1	ARG_175@HE	ARG_175@NE	269157	0.0567	2.8175	154.101
GLY_319@O	ASN_334@HD21	ASN_334@ND2	269116	0.0567	2.8595	155.824
ASP_253@O	HIE_418@HE2	HIE_418@NE2	269055	0.0566	2.842	155.57
ALA_69@O	ARG_32@HH12	ARG_32@NH1	268798	0.0566	2.8365	156.919
SER_342@O	ASN_346@H	ASN_346@N	268787	0.0566	2.8889	152.725
ASN_484@OD1	GLN_480@HE22	GLN_480@NE2	268687	0.0566	2.8614	154.441
LEU_332@O	SER_335@H	SER_335@N	268043	0.0564	2.8902	156.905
PHE_492@O	ASP_496@H	ASP_496@N	267937	0.0564	2.8901	161.259
GLU_41@OE2	ARG_37@HH21	ARG_37@NH2	267877	0.0564	2.8048	157.274
ASP_447@OD2	SER_401@HG	SER_401@OG	267520	0.0563	2.7144	160.566
GLU_196@OE2	ARG_230@HH21	ARG_230@NH2	266795	0.0562	2.8086	157.645
ALA_327@O	ARG_290@HE	ARG_290@NE	266787	0.0562	2.8525	152.141
ALA_257@OXT	ARG_214@HH22	ARG_214@NH2	266119	0.056	2.8036	160.664
GLN_183@O	SER_186@HG	SER_186@OG	265661	0.0559	2.7067	161.958
GLY_336@O	GLN_338@H	GLN_338@N	265338	0.0559	2.8255	148.309
ASP_238@OD2	PHE_242@H	PHE_242@N	264918	0.0558	2.8496	160.882
GLU_378@OE2	ARG_377@HH11	ARG_377@NH1	264663	0.0557	2.809	154.66
ASP_75@OD2	ASN_334@HD21	ASN_334@ND2	264481	0.0557	2.8325	159.736
ASP_75@OD1	ASN_334@HD21	ASN_334@ND2	263197	0.0554	2.8294	159.618
PRO_343@O	ASN_346@H	ASN_346@N	262979	0.0554	2.9033	153.744
PRO_343@O	ASN_346@HD22	ASN_346@ND2	262870	0.0553	2.8331	158.625
GLU_41@OE1	ARG_37@HH21	ARG_37@NH2	262766	0.0553	2.8054	157.162
SER_191@OG	ARG_194@HE	ARG_194@NE	262756	0.0553	2.8852	155.94
GLU_36@OE2	GLU_36@H	GLU_36@N	262728	0.0553	2.8346	150.15
GLU_322@OE2	ARG_324@H	ARG_324@N	262051	0.0552	2.8484	157.786
GLU_378@OE1	ARG_377@HH11	ARG_377@NH1	261958	0.0551	2.8092	154.515
LYS_211@O	ALA_213@H	ALA_213@N	261618	0.0551	2.8905	143.07
ASP_75@O	SER_337@HG	SER_337@OG	260626	0.0549	2.7237	164.12
GLU_145@OE2	TRP_181@HE1	TRP_181@NE1	260620	0.0549	2.8147	158.993
TRP_430@O	ARG_433@HH11	ARG_433@NH1	259531	0.0546	2.8374	160.852
GLY_328@O	ARG_290@HH11	ARG_290@NH1	259286	0.0546	2.8397	157.96
GLY_244@O	ALA_262@H	ALA_262@N	259189	0.0546	2.8482	158.672
ASP_341@OD2	ARG_277@HH11	ARG_277@NH1	258419	0.0544	2.7767	156.688
GLU_133@OE2	ARG_134@HE	ARG_134@NE	258110	0.0543	2.8171	157.188
ASP_501@OD2	GLY_502@H	GLY_502@N	257050	0.0541	2.8199	145.736
SER_507@O	ASP_511@H	ASP_511@N	256535	0.054	2.8819	161.302
GLU_271@OE1	HIE_187@HE2	HIE_187@NE2	255834	0.0539	2.826	158.013
SER_507@O	LEU_510@H	LEU_510@N	255679	0.0538	2.8839	150.632
GLU_58@OE2	ARG_66@H	ARG_66@N	254985	0.0537	2.8661	163.019
ILE_22@O	ASN_28@HD22	ASN_28@ND2	254502	0.0536	2.838	158.905
GLU_403@OE2	ARG_433@HH21	ARG_433@NH2	253652	0.0534	2.794	158.22
ASP_83@OD1	ARG_277@HH21	ARG_277@NH2	253507	0.0534	2.8086	154.416
LEU_490@O	ASN_494@HD22	ASN_494@ND2	253393	0.0533	2.8336	159.903
ALA_257@O	ARG_214@HH22	ARG_214@NH2	253247	0.0533	2.8012	160.159
LEU_57@O	GLY_61@H	GLY_61@N	252505	0.0532	2.868	146.661
ASP_75@OD1	ARG_427@HH22	ARG_427@NH2	252151	0.0531	2.8009	152.959
GLU_355@OE2	TYR_503@HH	TYR_503@OH	251937	0.053	2.6824	163.702
PRO_399@O	SER_402@HG	SER_402@OG	251819	0.053	2.7099	162.386
ASP_333@OD2	ARG_67@H	ARG_67@N	248484	0.0523	2.8801	165.059
ASN_226@OD1	GLN_222@HE22	GLN_222@NE2	248436	0.0523	2.8623	153.97
GLU_391@OE2	ARG_392@HH21	ARG_392@NH2	248164	0.0522	2.8251	154.567
SER_342@O	TRP_432@HE1	TRP_432@NE1	247895	0.0522	2.836	155.603
GLN_116@O	HIE_160@HE2	HIE_160@NE2	247884	0.0522	2.857	147
ILE_155@O	ALA_158@H	ALA_158@N	247649	0.0521	2.9123	146.737
GLN_358@OE1	LYS_486@HZ2	LYS_486@NZ	247641	0.0521	2.8067	149.836
GLN_358@OE1	LYS_486@HZ1	LYS_486@NZ	247640	0.0521	2.8067	149.893
THR_376@OG1	ASP_379@H	ASP_379@N	247264	0.0521	2.9226	152.913
GLY_502@O	SER_507@H	SER_507@N	247080	0.052	2.8802	159.572
GLN_100@O	LEU_104@H	LEU_104@N	246836	0.052	2.9273	156.244
GLU_166@OE1	ARG_169@HH11	ARG_169@NH1	246740	0.0519	2.7975	156.266
GLN_358@OE1	LYS_486@HZ3	LYS_486@NZ	246717	0.0519	2.807	149.79
PRO_268@O	GLN_270@H	GLN_270@N	246629	0.0519	2.8554	148.057
GLU_454@OE2	ARG_488@HH21	ARG_488@NH2	246603	0.0519	2.8036	157.623
GLU_145@OE2	HIE_185@HE2	HIE_185@NE2	246397	0.0519	2.8504	153.149
GLU_135@O	SER_139@H	SER_139@N	246351	0.0519	2.8666	153.469
SER_84@O	ALA_87@H	ALA_87@N	246295	0.0519	2.906	150.846
GLY_400@O	GLU_403@H	GLU_403@N	245464	0.0517	2.9044	158.854
ASP_75@O	SER_77@H	SER_77@N	245458	0.0517	2.8505	145.535
GLN_358@O	LEU_362@H	LEU_362@N	245072	0.0516	2.9258	156.351
SER_402@OG	SER_404@HG	SER_404@OG	244978	0.0516	2.7832	160.236
GLU_322@OE2	ARG_325@H	ARG_325@N	244832	0.0515	2.8453	160.637
GLU_391@OE1	ARG_392@HH21	ARG_392@NH2	243831	0.0513	2.8255	154.358
SER_162@O	VAL_165@H	VAL_165@N	242841	0.0511	2.8977	143.975
GLU_316@OE1	ARG_324@HH22	ARG_324@NH2	242757	0.0511	2.8054	155.435
GLU_145@OE2	ARG_175@HH12	ARG_175@NH1	242410	0.051	2.8009	154.817
SER_84@O	ASN_88@HD22	ASN_88@ND2	241775	0.0509	2.84	157.157
GLU_157@OE1	THR_263@H	THR_263@N	241719	0.0509	2.8433	158.745
ASP_506@OD1	SER_507@HG	SER_507@OG	241425	0.0508	2.739	162.972
GLU_36@OE1	GLU_36@H	GLU_36@N	241307	0.0508	2.8346	149.988
GLU_271@OE1	ARG_175@HH12	ARG_175@NH1	241280	0.0508	2.7823	160.479
ASN_346@O	ASN_349@H	ASN_349@N	241201	0.0508	2.9036	154.553
GLN_428@OE1	GLN_431@HE22	GLN_431@NE2	240751	0.0507	2.8433	156.263
ASP_243@O	LEU_246@H	LEU_246@N	240725	0.0507	2.8972	150.373
ASN_76@OD1	ASN_81@HD22	ASN_81@ND2	240693	0.0507	2.8419	160.402
LEU_450@O	LYS_453@H	LYS_453@N	239899	0.0505	2.9	158.03
GLU_454@OE1	ARG_488@HH21	ARG_488@NH2	239679	0.0505	2.8037	157.359
GLN_270@OE1	ARG_267@H	ARG_267@N	239538	0.0504	2.8703	160.478
GLU_135@OE1	ARG_267@HH12	ARG_267@NH1	238942	0.0503	2.8085	157.534
GLN_12@OE1	GLN_8@HE22	GLN_8@NE2	238518	0.0502	2.8474	162.248
ASP_511@O	ASP_514@H	ASP_514@N	238084	0.0501	2.8881	156.53
SER_397@O	ALA_4@H	ALA_4@N	237627	0.05	2.8693	158.343
GLU_434@OE1	ARG_9@HE	ARG_9@NE	237437	0.05	2.8496	162.382
SER_335@O	THR_82@HG1	THR_82@OG1	237425	0.05	2.7925	155.998
ASN_81@OD1	TRP_174@HE1	TRP_174@NE1	237345	0.05	2.8569	153.903
ASP_448@OD1	MET_1@H2	MET_1@N	237049	0.0499	2.7682	152.297
GLU_135@OE1	ARG_267@HH22	ARG_267@NH2	237044	0.0499	2.815	156.967
GLU_424@OE1	ASN_88@HD22	ASN_88@ND2	236823	0.0499	2.8138	160.335
GLU_13@OE2	GLN_8@HE22	GLN_8@NE2	236761	0.0498	2.8193	160.84
ASP_448@OD1	MET_1@H1	MET_1@N	236360	0.0498	2.7678	152.242
PRO_251@O	GLN_374@HE22	GLN_374@NE2	236219	0.0497	2.8474	159.417
GLU_120@OE2	GLU_120@H	GLU_120@N	235941	0.0497	2.8418	146.162
ASP_448@OD1	MET_1@H3	MET_1@N	235368	0.0496	2.7682	152.234
SER_449@OG	MET_1@H2	MET_1@N	235114	0.0495	2.8783	156.847
GLU_13@OE1	GLN_8@HE22	GLN_8@NE2	234638	0.0494	2.819	160.856
ASN_286@OD1	GLY_288@H	GLY_288@N	234149	0.0493	2.877	154.493
ASN_76@OD1	SER_79@HG	SER_79@OG	233632	0.0492	2.8353	155.691
SER_449@OG	MET_1@H1	MET_1@N	233309	0.0491	2.8784	156.831
GLN_431@OE1	ARG_427@HH12	ARG_427@NH1	232923	0.049	2.8083	153.17
SER_449@OG	MET_1@H3	MET_1@N	232631	0.049	2.8781	156.869
ASN_346@O	ALA_351@H	ALA_351@N	232140	0.0489	2.8885	156.163
ASN_334@OD1	GLY_336@H	GLY_336@N	231780	0.0488	2.8808	150.725
ALA_257@OXT	ARG_214@HH12	ARG_214@NH1	231587	0.0488	2.8161	157.71
ASP_190@OD2	LEU_192@H	LEU_192@N	231137	0.0487	2.8887	162.891
GLY_68@O	TYR_72@HH	TYR_72@OH	230655	0.0486	2.7601	162.031
ASP_514@OD1	GLN_358@HE22	GLN_358@NE2	230523	0.0485	2.8139	162.822
GLY_94@O	GLU_97@H	GLU_97@N	230311	0.0485	2.9055	148.426
GLU_120@OE1	GLU_120@H	GLU_120@N	229391	0.0483	2.8419	146.205
GLU_296@OE2	ARG_295@HH22	ARG_295@NH2	229309	0.0483	2.8067	155.396
GLN_338@OE1	ARG_277@HH12	ARG_277@NH1	229261	0.0483	2.808	154.402
GLU_491@OE1	ARG_488@HH12	ARG_488@NH1	228826	0.0482	2.7985	157.453
ALA_351@O	GLU_355@H	GLU_355@N	228030	0.048	2.8801	161.924
GLU_316@OE1	ARG_324@HE	ARG_324@NE	227946	0.048	2.8358	156.297
GLU_106@OE2	TRP_172@HE1	TRP_172@NE1	227874	0.048	2.8546	155.214
ASP_190@OD1	LEU_192@H	LEU_192@N	227714	0.0479	2.889	162.961
ASP_379@OD1	HIE_418@HE2	HIE_418@NE2	227600	0.0479	2.8355	159.317
GLU_296@OE1	ARG_295@HH22	ARG_295@NH2	227564	0.0479	2.8065	155.619
GLU_271@OE1	GLN_183@HE22	GLN_183@NE2	227067	0.0478	2.8182	162.53
ASP_447@OD2	SER_449@H	SER_449@N	226964	0.0478	2.873	156.589
ASN_28@OD1	GLY_30@H	GLY_30@N	226861	0.0478	2.8764	153.831
GLU_157@OE1	SER_261@H	SER_261@N	226375	0.0477	2.8537	157.32
THR_118@OG1	ASP_121@H	ASP_121@N	226188	0.0476	2.9235	152.868
GLU_64@OE2	GLN_80@H	GLN_80@N	226098	0.0476	2.8658	151.293
GLU_135@OE2	ARG_267@HH12	ARG_267@NH1	225796	0.0475	2.8101	157.737
GLU_403@OE1	ARG_433@HH21	ARG_433@NH2	225682	0.0475	2.793	157.9
ASP_506@OD2	SER_507@HG	SER_507@OG	225436	0.0475	2.7378	162.867
ASP_75@OD1	SER_77@H	SER_77@N	224928	0.0474	2.8874	156.824
GLU_271@OE2	TRP_172@HE1	TRP_172@NE1	222789	0.0469	2.8125	158.184
ASP_189@O	ARG_230@HH21	ARG_230@NH2	222758	0.0469	2.8086	153.229
GLU_176@OE1	LYS_318@HZ1	LYS_318@NZ	222636	0.0469	2.7903	153.867
GLN_173@O	GLN_173@HE22	GLN_173@NE2	222542	0.0469	2.8716	149.019
GLU_52@OE2	ARG_9@HH12	ARG_9@NH1	222450	0.0468	2.8187	156.569
SER_337@OG	ASN_334@HD22	ASN_334@ND2	221921	0.0467	2.8789	159.366
GLU_176@OE1	LYS_318@HZ3	LYS_318@NZ	221824	0.0467	2.7906	154.028
GLU_294@OE2	ARG_305@HH11	ARG_305@NH1	221807	0.0467	2.7824	158.171
LYS_318@O	GLN_338@HE22	GLN_338@NE2	221628	0.0467	2.8395	159.537
PRO_284@O	ASN_286@H	ASN_286@N	221340	0.0466	2.8572	146.481
THR_340@OG1	GLN_428@HE21	GLN_428@NE2	220867	0.0465	2.8712	155.918
GLU_145@OE1	HIE_185@HE2	HIE_185@NE2	220415	0.0464	2.8496	153.146
ASP_190@OD1	SER_144@HG	SER_144@OG	220245	0.0464	2.7241	162.324
GLU_52@OE1	ARG_9@HH12	ARG_9@NH1	219943	0.0463	2.8182	156.434
GLU_491@O	ASN_494@HD22	ASN_494@ND2	219466	0.0462	2.8366	158.47
GLU_491@OE2	ARG_488@HH12	ARG_488@NH1	219000	0.0461	2.7986	157.566
GLU_322@OE2	ARG_325@HE	ARG_325@NE	218917	0.0461	2.8259	156.019
TRP_250@O	ASP_253@H	ASP_253@N	217786	0.0458	2.9001	159.477
GLU_176@OE1	LYS_318@HZ2	LYS_318@NZ	217621	0.0458	2.7915	153.912
GLU_233@O	VAL_237@H	VAL_237@N	217563	0.0458	2.8807	158.52
ASP_256@OD1	ALA_257@H	ALA_257@N	217520	0.0458	2.8465	145.467
GLU_176@OE2	LYS_318@HZ1	LYS_318@NZ	217476	0.0458	2.7921	153.939
GLU_176@OE2	LYS_318@HZ2	LYS_318@NZ	216967	0.0457	2.7909	154.09
GLU_133@OE1	ARG_134@HE	ARG_134@NE	216533	0.0456	2.8171	157.302
ASP_344@OD1	ASN_436@HD22	ASN_436@ND2	215754	0.0454	2.8274	160.816
GLU_310@OE1	ARG_267@HH21	ARG_267@NH2	215596	0.0454	2.8	155.571
GLU_271@OE2	GLN_183@HE22	GLN_183@NE2	215518	0.0454	2.8176	162.501
ARG_67@O	TYR_72@HH	TYR_72@OH	214990	0.0453	2.769	161.124
ASP_189@OD1	ARG_230@HH21	ARG_230@NH2	214985	0.0453	2.7827	158.843
SER_77@O	GLN_431@HE22	GLN_431@NE2	214801	0.0452	2.828	158.475
ASP_238@O	PHE_242@H	PHE_242@N	214343	0.0451	2.8954	159.086
ASP_514@OD2	GLN_358@HE22	GLN_358@NE2	214158	0.0451	2.8134	162.698
GLU_166@OE2	ASN_339@HD22	ASN_339@ND2	213947	0.045	2.8177	162.705
GLU_434@OE1	ARG_433@HH22	ARG_433@NH2	213734	0.045	2.8117	152.231
GLU_378@OE2	GLU_378@H	GLU_378@N	213621	0.045	2.8411	146.259
GLU_135@OE1	SER_138@HG	SER_138@OG	213231	0.0449	2.6993	163.403
SER_342@O	ALA_345@H	ALA_345@N	213014	0.0448	2.9043	153.978
GLU_299@O	ASP_302@H	ASP_302@N	212941	0.0448	2.9098	147.753
ASP_341@OD2	ASN_339@HD22	ASN_339@ND2	212685	0.0448	2.8024	160.527
GLU_64@OE1	ARG_67@H	ARG_67@N	212336	0.0447	2.8476	162.389
GLU_176@OE2	LYS_318@HZ3	LYS_318@NZ	211993	0.0446	2.7916	153.913
PRO_437@O	GLN_441@HE22	GLN_441@NE2	211624	0.0446	2.8502	160.08
GLY_502@O	TRP_439@HE1	TRP_439@NE1	211151	0.0445	2.8473	149.083
ASP_75@O	GLN_80@HE22	GLN_80@NE2	211092	0.0444	2.8301	159.729
ASP_83@OD2	ARG_277@HH21	ARG_277@NH2	210801	0.0444	2.8146	152.839
GLU_434@OE2	ARG_9@HE	ARG_9@NE	209884	0.0442	2.8492	162.161
GLU_434@OE2	ARG_433@HH22	ARG_433@NH2	208124	0.0438	2.811	152.064
GLY_70@O	ARG_32@HE	ARG_32@NE	207336	0.0436	2.8495	148.151
THR_417@O	GLN_374@HE22	GLN_374@NE2	206938	0.0436	2.8522	160.282
ASP_75@OD1	ARG_427@HH12	ARG_427@NH1	206786	0.0435	2.8137	151.913
GLU_176@OE2	TRP_172@HE1	TRP_172@NE1	206436	0.0435	2.8405	152.727
GLU_145@OE1	TRP_181@HE1	TRP_181@NE1	205831	0.0433	2.8158	159.12
GLU_135@OE2	SER_138@HG	SER_138@OG	205797	0.0433	2.6994	163.258
ASN_334@O	GLN_338@HE21	GLN_338@NE2	205385	0.0432	2.8688	160.348
GLU_316@OE1	ARG_324@HH12	ARG_324@NH1	204989	0.0432	2.7953	156.485
ASP_344@O	VAL_347@H	VAL_347@N	204433	0.043	2.8836	151.309
ASP_341@OD1	ARG_169@HH22	ARG_169@NH2	203568	0.0429	2.8109	159.115
GLU_393@OE2	ARG_9@HH11	ARG_9@NH1	202589	0.0427	2.8127	156.64
LYS_469@O	ALA_471@H	ALA_471@N	202431	0.0426	2.8925	142.892
SER_337@O	THR_340@HG1	THR_340@OG1	202206	0.0426	2.7388	160.667
GLY_400@O	SER_404@HG	SER_404@OG	202090	0.0425	2.7581	161.11
GLU_378@OE1	GLU_378@H	GLU_378@N	201383	0.0424	2.8411	146.242
ASP_20@O	ILE_23@H	ILE_23@N	201186	0.0424	2.9005	147.86
GLN_150@OE1	SER_264@H	SER_264@N	201080	0.0423	2.8631	160.155
GLU_166@OE1	ASN_339@HD21	ASN_339@ND2	201052	0.0423	2.8147	161.618
GLU_316@OE1	ARG_324@HH21	ARG_324@NH2	200649	0.0422	2.8083	154.467
ASP_447@OD1	SER_3@HG	SER_3@OG	200079	0.0421	2.6739	163.227
ASP_344@OD2	ASN_436@HD22	ASN_436@ND2	200060	0.0421	2.8281	160.807
ASP_86@OD2	TRP_174@HE1	TRP_174@NE1	199847	0.0421	2.8441	150.239
GLU_310@OE2	ARG_267@HH21	ARG_267@NH2	199259	0.0419	2.8016	155.276
GLU_31@OE1	ARG_325@HH22	ARG_325@NH2	199135	0.0419	2.7963	157.84
GLU_176@OE2	GLN_270@HE21	GLN_270@NE2	199017	0.0419	2.8214	161.598
ASP_511@OD1	ARG_214@HH11	ARG_214@NH1	198370	0.0418	2.7749	158.454
GLY_326@O	TYR_330@HH	TYR_330@OH	198078	0.0417	2.7401	164.052
ARG_325@O	ALA_327@H	ALA_327@N	197625	0.0416	2.854	146.496
GLU_391@OE1	ARG_392@HE	ARG_392@NE	197406	0.0416	2.8178	156.643
GLU_166@OE1	ASN_349@HD21	ASN_349@ND2	197388	0.0416	2.8251	161.068
GLU_294@OE1	ARG_305@HH11	ARG_305@NH1	197341	0.0415	2.7881	158.428
GLU_176@OE1	TRP_172@HE1	TRP_172@NE1	197182	0.0415	2.8413	152.88
GLU_378@OE2	ARG_377@HH22	ARG_377@NH2	197099	0.0415	2.8103	153.838
LEU_136@O	SER_139@HG	SER_139@OG	196888	0.0415	2.7606	157.036
GLU_135@OE2	ARG_267@HH22	ARG_267@NH2	196578	0.0414	2.8161	156.923
ASP_75@OD2	GLN_338@HE22	GLN_338@NE2	196251	0.0413	2.8284	163.081
ASP_341@OD1	ASN_339@HD22	ASN_339@ND2	196129	0.0413	2.8024	160.9
ASP_243@O	ARG_267@HH12	ARG_267@NH1	196065	0.0413	2.8308	149.883
GLU_316@OE2	ARG_324@HE	ARG_324@NE	195232	0.0411	2.8346	156.69
ASP_448@OD2	MET_1@H2	MET_1@N	195230	0.0411	2.7696	152.235
ASN_349@O	GLY_352@H	GLY_352@N	195173	0.0411	2.8923	152.671
ASP_448@OD2	MET_1@H3	MET_1@N	194361	0.0409	2.769	152.277
SER_84@O	ASN_88@H	ASN_88@N	193478	0.0407	2.8786	150.558
GLU_316@OE2	ARG_324@HH21	ARG_324@NH2	193394	0.0407	2.8059	155.167
ASN_436@O	ILE_440@H	ILE_440@N	193285	0.0407	2.9223	161.357
GLY_68@O	ARG_32@HH11	ARG_32@NH1	193237	0.0407	2.839	152.428
SER_401@O	SER_444@HG	SER_444@OG	192998	0.0406	2.7374	161.595
GLN_12@OE1	GLN_8@H	GLN_8@N	192671	0.0406	2.8449	151.253
GLY_328@O	ARG_290@HH21	ARG_290@NH2	192320	0.0405	2.8179	152.059
SER_144@O	GLY_147@H	GLY_147@N	191691	0.0404	2.8727	144.206
GLU_157@OE2	SER_261@HG	SER_261@OG	191599	0.0403	2.6943	162.65
ASP_248@OD2	SER_249@H	SER_249@N	191550	0.0403	2.8371	144.228
SER_77@O	ASN_81@HD22	ASN_81@ND2	191134	0.0402	2.8483	159.707
GLU_135@OE1	SER_146@HG	SER_146@OG	191061	0.0402	2.6995	163.336
SER_264@O	GLN_266@HE22	GLN_266@NE2	190665	0.0401	2.8574	157.837
LEU_446@O	ARG_488@HH11	ARG_488@NH1	190642	0.0401	2.8206	155.652
GLU_106@OE1	TRP_172@HE1	TRP_172@NE1	190523	0.0401	2.8535	155.196
GLU_378@OE1	ARG_377@HH22	ARG_377@NH2	190481	0.0401	2.8107	153.917
LEU_394@O	SER_449@HG	SER_449@OG	190278	0.0401	2.787	153.024
GLU_299@OE2	ARG_295@HH11	ARG_295@NH1	190184	0.04	2.8072	157.484
SER_77@OG	GLN_428@HE21	GLN_428@NE2	189961	0.04	2.8792	157.477
ASP_341@OD2	THR_340@HG1	THR_340@OG1	189880	0.04	2.717	162.997
GLU_391@OE2	ARG_392@HE	ARG_392@NE	189874	0.04	2.8181	156.627
GLU_289@OE1	ARG_67@HH22	ARG_67@NH2	189679	0.0399	2.8032	158.297
ASN_339@OD1	GLN_338@HE22	GLN_338@NE2	189597	0.0399	2.8283	161.011
GLN_222@O	ASN_226@HD22	ASN_226@ND2	189560	0.0399	2.8415	159.688
ASP_448@OD2	MET_1@H1	MET_1@N	189500	0.0399	2.7695	152.335
GLU_135@OE2	SER_146@HG	SER_146@OG	189412	0.0399	2.6983	163.442
GLU_299@OE1	ARG_295@HH11	ARG_295@NH1	189316	0.0399	2.8077	157.507
ASN_178@OD1	LYS_282@HZ1	LYS_282@NZ	189201	0.0398	2.811	155.053
GLU_289@OE2	ARG_67@HH22	ARG_67@NH2	189061	0.0398	2.8028	158.121
SER_6@O	ARG_9@HH11	ARG_9@NH1	188594	0.0397	2.8236	149.559
ALA_345@O	CYS_348@H	CYS_348@N	188274	0.0396	2.8827	156.508
GLN_8@OE1	GLN_8@H	GLN_8@N	188142	0.0396	2.8398	148.458
GLY_336@O	ASN_339@H	ASN_339@N	188140	0.0396	2.8969	152.864
LEU_62@O	ASP_75@H	ASP_75@N	187874	0.0396	2.8966	152.248
GLU_271@OE2	ARG_267@HH11	ARG_267@NH1	187863	0.0396	2.7914	159.739
VAL_347@O	ASP_350@H	ASP_350@N	187145	0.0394	2.893	150.364
ASP_238@O	ILE_240@H	ILE_240@N	187024	0.0394	2.8405	147.965
SER_6@O	ARG_9@H	ARG_9@N	187020	0.0394	2.8798	148.493
PRO_10@O	GLU_13@H	GLU_13@N	186821	0.0393	2.8918	145.021
ASN_178@OD1	LYS_282@HZ3	LYS_282@NZ	186805	0.0393	2.8117	155.268
ILE_109@O	PHE_112@H	PHE_112@N	186509	0.0393	2.8972	143.493
GLU_355@OE1	TYR_503@HH	TYR_503@OH	186449	0.0393	2.6821	164.365
ASP_256@OD2	ALA_257@H	ALA_257@N	186210	0.0392	2.8466	145.241
ASP_447@OD2	SER_402@HG	SER_402@OG	185952	0.0391	2.6626	163.598
MET_438@O	GLN_441@H	GLN_441@N	185859	0.0391	2.8897	149.396
ASP_75@OD1	GLN_338@HE22	GLN_338@NE2	185630	0.0391	2.8321	162.635
ASN_339@OD1	ARG_277@HH22	ARG_277@NH2	184888	0.0389	2.8306	154.496
GLU_322@OE2	ARG_325@HH21	ARG_325@NH2	184750	0.0389	2.8147	153.64
ASP_501@O	TYR_503@H	TYR_503@N	183163	0.0386	2.8698	145.838
ASP_302@OD1	SER_264@HG	SER_264@OG	183102	0.0385	2.6704	163.905
ARG_67@O	ARG_32@HH22	ARG_32@NH2	182981	0.0385	2.8234	153.723
ASP_302@OD2	SER_264@HG	SER_264@OG	182675	0.0385	2.673	163.877
GLN_173@OE1	ASN_81@HD21	ASN_81@ND2	182535	0.0384	2.8548	160.162
GLU_157@OE2	SER_261@H	SER_261@N	182518	0.0384	2.8585	157.181
LEU_332@O	ASN_334@H	ASN_334@N	182269	0.0384	2.8608	145.599
LEU_389@O	ARG_392@H	ARG_392@N	182030	0.0383	2.894	143.676
ASN_178@OD1	LYS_282@HZ2	LYS_282@NZ	181814	0.0383	2.8119	154.653
GLU_289@OE2	ARG_67@HH12	ARG_67@NH1	181210	0.0381	2.8044	158.326
ASP_253@OD2	LYS_254@H	LYS_254@N	181142	0.0381	2.8273	145.326
ASP_448@O	SER_449@HG	SER_449@OG	180933	0.0381	2.7032	156.964
ASP_189@O	TYR_193@H	TYR_193@N	180752	0.0381	2.8976	163.059
ASN_346@OD1	ASN_349@H	ASN_349@N	180719	0.038	2.8541	156.059
GLN_173@OE1	ARG_169@HH11	ARG_169@NH1	180517	0.038	2.8307	155.191
ASN_88@OD1	ASP_92@H	ASP_92@N	180470	0.038	2.8742	159.691
ASN_435@OD1	ARG_19@HH11	ARG_19@NH1	180113	0.0379	2.8184	153.638
HIE_445@O	LYS_2@HZ3	LYS_2@NZ	179716	0.0378	2.8127	155.21
VAL_513@O	ALA_515@H	ALA_515@N	179227	0.0377	2.8756	146.738
ASP_447@OD2	ARG_452@HH12	ARG_452@NH1	179127	0.0377	2.7873	161.595
ILE_22@O	THR_25@H	THR_25@N	179123	0.0377	2.9051	151.12
HIE_445@O	LYS_2@HZ2	LYS_2@NZ	179084	0.0377	2.8126	155.196
ALA_69@O	TYR_72@HH	TYR_72@OH	178983	0.0377	2.7519	162.012
GLU_132@O	GLU_135@H	GLU_135@N	178682	0.0376	2.8918	145.185
GLU_289@OE1	ARG_67@HH12	ARG_67@NH1	178273	0.0375	2.8058	158.354
ASP_83@OD1	ASN_177@HD21	ASN_177@ND2	178210	0.0375	2.8426	159.905
ALA_257@OXT	ASN_108@HD21	ASN_108@ND2	177983	0.0375	2.8258	163.223
ASP_379@OD2	HIE_418@HE2	HIE_418@NE2	177978	0.0375	2.8361	159.265
ARG_267@O	GLU_271@H	GLU_271@N	177798	0.0374	2.8913	159.821
SER_264@O	GLN_150@HE21	GLN_150@NE2	177767	0.0374	2.8656	158.044
PHE_500@O	TYR_503@H	TYR_503@N	177680	0.0374	2.8995	155.825
GLU_166@OE2	ASN_349@HD21	ASN_349@ND2	177633	0.0374	2.8228	161.65
ARG_267@O	TYR_269@H	TYR_269@N	177355	0.0373	2.8245	144.903
GLU_166@OE1	ARG_169@HH12	ARG_169@NH1	176871	0.0372	2.7981	159.944
SER_444@OG	SER_3@HG	SER_3@OG	176641	0.0372	2.8083	161.871
GLU_322@OE1	ARG_325@HH21	ARG_325@NH2	176041	0.0371	2.8164	153.994
GLU_424@OE2	ASN_88@HD22	ASN_88@ND2	175774	0.037	2.8111	159.901
ASN_177@OD1	ARG_277@HH12	ARG_277@NH1	175701	0.037	2.8327	151.538
GLU_31@OE2	ARG_325@HH22	ARG_325@NH2	175308	0.0369	2.8006	157.454
ASP_253@OD1	LYS_254@H	LYS_254@N	175176	0.0369	2.8259	145.28
PRO_437@O	GLN_8@HE21	GLN_8@NE2	175169	0.0369	2.8727	160.403
SER_77@OG	ASN_339@H	ASN_339@N	174904	0.0368	2.9012	158.45
HIE_445@O	LYS_2@HZ1	LYS_2@NZ	174887	0.0368	2.8124	155.118
ALA_4@O	ARG_427@HH12	ARG_427@NH1	174757	0.0368	2.8299	157.632
ASP_341@OD2	ARG_169@HH12	ARG_169@NH1	174187	0.0367	2.8094	160.545
ASP_86@OD2	LYS_2@H	LYS_2@N	174141	0.0367	2.8186	152.371
HIE_187@ND1	TYR_241@HH	TYR_241@OH	173975	0.0366	2.8492	159.584
ASP_344@O	ASN_349@HD22	ASN_349@ND2	173636	0.0366	2.8631	157.17
SER_444@O	SER_401@H	SER_401@N	173615	0.0366	2.8655	154.29
GLN_173@O	ASN_177@HD22	ASN_177@ND2	173271	0.0365	2.8338	160.04
ALA_327@O	ARG_290@HH21	ARG_290@NH2	172964	0.0364	2.8283	151.758
ASP_497@OD2	ILE_498@H	ILE_498@N	172835	0.0364	2.8342	145.029
ASP_350@O	GLY_352@H	GLY_352@N	172741	0.0364	2.8314	147.194
LEU_246@O	ASP_248@H	ASP_248@N	172694	0.0364	2.853	147.062
GLU_390@O	GLU_393@H	GLU_393@N	171752	0.0362	2.9067	152.443
ASP_83@OD2	ASN_177@HD21	ASN_177@ND2	171746	0.0362	2.8437	160.618
ASP_344@OD1	TRP_432@HE1	TRP_432@NE1	170968	0.036	2.8274	155.236
ASP_189@O	LEU_192@H	LEU_192@N	170548	0.0359	2.9054	153.367
GLU_58@OE1	ARG_66@H	ARG_66@N	170318	0.0359	2.8722	163.905
TRP_439@O	LEU_442@H	LEU_442@N	169958	0.0358	2.887	148.911
LEU_231@O	PHE_234@H	PHE_234@N	169329	0.0356	2.905	157.833
GLU_166@OE1	ASN_339@HD22	ASN_339@ND2	169224	0.0356	2.8165	162.465
ARG_134@O	ALA_137@H	ALA_137@N	168368	0.0354	2.9004	147.399
GLU_316@OE2	ARG_324@HH22	ARG_324@NH2	167937	0.0354	2.8032	156.337
GLU_64@OE1	GLN_80@H	GLN_80@N	167534	0.0353	2.8728	152.458
GLU_271@OE1	ARG_267@HH11	ARG_267@NH1	167163	0.0352	2.7912	160.134
ASP_86@OD2	LYS_282@HZ1	LYS_282@NZ	167026	0.0352	2.7772	159.635
TYR_27@O	GLU_31@H	GLU_31@N	166906	0.0351	2.8857	154.643
HIE_185@ND1	TYR_245@HH	TYR_245@OH	166846	0.0351	2.851	160.214
LYS_60@O	ASN_76@HD22	ASN_76@ND2	166719	0.0351	2.8637	159.277
ASP_248@OD1	SER_249@H	SER_249@N	166661	0.0351	2.8372	143.962
ASP_86@O	VAL_89@H	VAL_89@N	166529	0.0351	2.9028	155.997
ASP_86@O	ASN_178@HD21	ASN_178@ND2	166375	0.035	2.8574	157.868
ALA_69@O	ARG_32@HH11	ARG_32@NH1	166366	0.035	2.8373	157.267
GLU_322@OE1	ARG_325@HH22	ARG_325@NH2	166279	0.035	2.8042	150.074
ASP_75@OD1	ARG_19@HH11	ARG_19@NH1	166164	0.035	2.7906	154.781
ILE_367@O	PHE_370@H	PHE_370@N	166129	0.035	2.9016	143.923
GLU_135@O	SER_138@HG	SER_138@OG	165314	0.0348	2.7107	161.151
GLN_100@OE1	TRP_250@H	TRP_250@N	165234	0.0348	2.8875	156.561
TYR_245@OH	TRP_181@HE1	TRP_181@NE1	165176	0.0348	2.8942	154.806
GLY_326@O	GLY_328@H	GLY_328@N	165124	0.0348	2.8548	146.547
SER_3@OG	ARG_452@HH22	ARG_452@NH2	164851	0.0347	2.8473	159.087
GLN_173@OE1	ASN_81@HD22	ASN_81@ND2	164558	0.0346	2.8487	159.787
VAL_89@O	ASN_91@H	ASN_91@N	164388	0.0346	2.869	145.817
ARG_19@O	ARG_19@HH12	ARG_19@NH1	164262	0.0346	2.8634	164.841
ASP_379@OD2	LYS_254@HZ2	LYS_254@NZ	164218	0.0346	2.8127	156.455
ARG_433@O	HIE_443@HE2	HIE_443@NE2	163946	0.0345	2.8244	152.101
GLY_70@O	ARG_32@HH12	ARG_32@NH1	163386	0.0344	2.8358	156.795
GLU_390@OE2	AP1_406@H	AP1_406@N	163348	0.0344	2.8201	146.422
ASP_75@OD1	ARG_19@HH22	ARG_19@NH2	163163	0.0344	2.8128	151.72
GLU_393@OE2	SER_396@HG	SER_396@OG	162833	0.0343	2.6896	163.272
ASP_75@OD2	ARG_427@HH22	ARG_427@NH2	162379	0.0342	2.7935	155.119
GLN_12@OE1	ALA_7@H	ALA_7@N	162328	0.0342	2.8645	155.63
ARG_267@O	GLN_270@HE22	GLN_270@NE2	161303	0.034	2.8339	158.79
HIE_445@ND1	LYS_2@H	LYS_2@N	161168	0.0339	2.915	159.063
LEU_105@O	ASN_108@H	ASN_108@N	160820	0.0339	2.9033	142.646
GLU_364@OE2	TRP_430@HE1	TRP_430@NE1	160648	0.0338	2.8681	159.343
ASN_81@OD1	GLN_173@HE22	GLN_173@NE2	159903	0.0337	2.8394	153.309
GLU_176@OE2	SER_77@HG	SER_77@OG	159556	0.0336	2.6657	164.536
ASP_190@OD2	SER_144@HG	SER_144@OG	159495	0.0336	2.7208	162.699
MET_259@O	ALA_262@H	ALA_262@N	159454	0.0336	2.901	156.819
TRP_197@O	ASP_200@H	ASP_200@N	158974	0.0335	2.8862	143.28
ASP_341@OD1	ARG_169@HH12	ARG_169@NH1	158966	0.0335	2.8112	159.595
ASP_86@OD2	LYS_282@HZ2	LYS_282@NZ	158265	0.0333	2.7777	159.512
ASP_341@OD2	ARG_277@HH22	ARG_277@NH2	158248	0.0333	2.82	150.289
GLN_374@O	HIE_418@HE2	HIE_418@NE2	158190	0.0333	2.8575	149.608
ARG_169@O	TRP_172@H	TRP_172@N	157761	0.0332	2.8964	144.133
LEU_188@O	SER_143@HG	SER_143@OG	157520	0.0332	2.7203	160.788
GLU_97@OE1	SER_249@HG	SER_249@OG	157458	0.0331	2.6785	163.856
GLU_369@OE2	ARG_472@HH11	ARG_472@NH1	157450	0.0331	2.7937	157.288
GLN_358@OE1	HIE_160@HE2	HIE_160@NE2	157327	0.0331	2.8478	157.795
GLU_36@OE1	ARG_37@H	ARG_37@N	157141	0.0331	2.846	145.782
GLU_271@OE1	GLU_271@H	GLU_271@N	157121	0.0331	2.804	147.097
ASP_341@OD2	ARG_169@HH22	ARG_169@NH2	156975	0.033	2.8128	158.454
GLU_31@OE2	ARG_325@HH11	ARG_325@NH1	156040	0.0329	2.8121	157.51
ASP_86@OD2	LYS_282@HZ3	LYS_282@NZ	155955	0.0328	2.7778	159.605
ASP_379@OD2	LYS_254@HZ3	LYS_254@NZ	155683	0.0328	2.8121	156.394
GLU_393@OE1	SER_396@HG	SER_396@OG	155599	0.0328	2.6889	163.483
GLU_454@OE1	ASN_484@HD21	ASN_484@ND2	155256	0.0327	2.8324	160.618
THR_263@O	GLN_266@H	GLN_266@N	155117	0.0327	2.9056	158.206
GLU_434@OE2	GLN_431@HE22	GLN_431@NE2	154847	0.0326	2.8079	155.178
ASP_379@OD2	LYS_254@HZ1	LYS_254@NZ	154271	0.0325	2.8113	156.227
ILE_59@O	GLN_428@HE21	GLN_428@NE2	154096	0.0324	2.8753	157.955
GLU_322@OE1	ARG_324@H	ARG_324@N	154066	0.0324	2.8634	157.772
GLU_364@OE1	TRP_430@HE1	TRP_430@NE1	154017	0.0324	2.8676	159.257
GLY_142@O	ASP_190@H	ASP_190@N	153966	0.0324	2.8915	162.685
ASN_349@OD1	ASN_436@HD21	ASN_436@ND2	153759	0.0324	2.8498	157.801
LEU_363@O	ASN_366@H	ASN_366@N	153525	0.0323	2.9061	142.859
GLU_299@OE1	ARG_295@HH21	ARG_295@NH2	153403	0.0323	2.805	157.128
HIE_418@O	LYS_254@HZ1	LYS_254@NZ	153334	0.0323	2.8055	153.767
GLU_424@OE2	ASN_76@HD22	ASN_76@ND2	153227	0.0323	2.84	160.876
GLU_36@OE2	ARG_37@H	ARG_37@N	153185	0.0322	2.8459	145.809
ALA_327@O	ARG_290@HH12	ARG_290@NH1	152894	0.0322	2.8306	155.583
ASN_339@OD1	GLN_173@HE22	GLN_173@NE2	152861	0.0322	2.842	158.618
ASP_341@OD1	THR_340@HG1	THR_340@OG1	152790	0.0322	2.7191	163.002
GLU_310@OE1	ARG_267@HE	ARG_267@NE	152761	0.0322	2.8218	155.585
GLU_145@OE1	ARG_175@HH21	ARG_175@NH2	152661	0.0321	2.8067	158.057
ASN_339@OD1	GLN_170@HE21	GLN_170@NE2	152612	0.0321	2.8518	161.099
SER_335@O	ASN_81@HD22	ASN_81@ND2	152419	0.0321	2.8542	158.576
GLU_310@OE2	ARG_267@HE	ARG_267@NE	152390	0.0321	2.822	155.819
GLU_38@O	GLU_41@H	GLU_41@N	152221	0.032	2.8951	144.35
GLY_319@O	GLN_338@HE22	GLN_338@NE2	151877	0.032	2.8327	156.531
ASP_350@OD2	LYS_260@H	LYS_260@N	151726	0.0319	2.8278	156.314
GLU_271@O	ALA_274@H	ALA_274@N	151680	0.0319	2.8896	144.004
GLN_8@OE1	GLN_441@HE22	GLN_441@NE2	151418	0.0319	2.8384	158.73
ASN_346@O	ASN_349@HD22	ASN_349@ND2	151363	0.0319	2.8394	157.873
ALA_359@O	LEU_362@H	LEU_362@N	151290	0.0319	2.9151	145.901
GLN_441@O	SER_444@H	SER_444@N	150824	0.0318	2.9006	150.766
SER_401@OG	SER_6@HG	SER_6@OG	150198	0.0316	2.7922	159.059
GLN_8@OE1	GLN_12@HE21	GLN_12@NE2	149888	0.0316	2.8506	157.85
GLU_393@OE1	SER_397@HG	SER_397@OG	149861	0.0315	2.6513	164.46
GLU_369@OE1	ARG_472@HH11	ARG_472@NH1	149386	0.0314	2.7938	157.159
LEU_315@O	GLY_319@H	GLY_319@N	149187	0.0314	2.8665	144.603
GLU_271@OE2	GLU_271@H	GLU_271@N	149184	0.0314	2.8051	147.374
ASP_333@O	ASN_76@HD21	ASN_76@ND2	148983	0.0314	2.8379	158.251
GLU_289@OE1	ASN_286@H	ASN_286@N	148965	0.0314	2.8629	161.979
GLU_299@OE2	ARG_295@HH21	ARG_295@NH2	148805	0.0313	2.8059	156.918
GLN_173@OE1	LYS_318@HZ2	LYS_318@NZ	148664	0.0313	2.8119	154.991
HIE_418@O	LYS_254@HZ3	LYS_254@NZ	148529	0.0313	2.8059	153.785
GLU_289@OE2	ASN_286@H	ASN_286@N	148475	0.0313	2.8627	161.983
GLU_13@OE2	GLN_441@HE22	GLN_441@NE2	148456	0.0313	2.8209	162.234
GLN_173@OE1	LYS_318@HZ1	LYS_318@NZ	148418	0.0312	2.8126	154.944
HIE_418@O	LYS_254@HZ2	LYS_254@NZ	148344	0.0312	2.8061	153.819
SER_191@O	ARG_194@H	ARG_194@N	147941	0.0311	2.9016	154.955
ASN_435@OD1	ARG_19@HE	ARG_19@NE	147772	0.0311	2.8447	151.397
GLY_400@O	SER_404@H	SER_404@N	147681	0.0311	2.8794	153.484
GLU_120@OE1	ARG_119@HH11	ARG_119@NH1	147663	0.0311	2.805	156.147
GLU_434@OE1	GLN_8@HE21	GLN_8@NE2	147619	0.0311	2.8327	160.245
GLU_393@OE1	SER_402@HG	SER_402@OG	147564	0.0311	2.6897	165.733
ASN_334@OD1	ARG_277@HH21	ARG_277@NH2	147262	0.031	2.8308	150.475
ASP_350@OD1	LYS_260@H	LYS_260@N	147255	0.031	2.8278	155.898
GLU_322@OE1	ARG_290@HH22	ARG_290@NH2	146868	0.0309	2.8042	154.245
GLN_170@OE1	ASN_339@HD21	ASN_339@ND2	146660	0.0309	2.85	156.956
GLU_176@OE2	ARG_277@HH21	ARG_277@NH2	146360	0.0308	2.777	153.775
GLU_176@OE1	ARG_277@HH21	ARG_277@NH2	146326	0.0308	2.7774	154.105
GLY_61@O	GLY_78@H	GLY_78@N	146008	0.0307	2.9033	151.156
ASP_497@OD1	ILE_498@H	ILE_498@N	145884	0.0307	2.8352	144.999
SER_79@O	GLN_431@HE21	GLN_431@NE2	145683	0.0307	2.8622	158.491
ASP_83@OD2	ARG_277@HE	ARG_277@NE	145664	0.0307	2.8295	154.958
GLN_173@OE1	LYS_318@HZ3	LYS_318@NZ	145533	0.0306	2.812	154.992
SER_139@OG	ALA_140@H	ALA_140@N	145482	0.0306	2.8146	139.721
GLU_454@OE2	ASN_484@HD21	ASN_484@ND2	145245	0.0306	2.8326	160.512
SER_77@OG	GLY_336@H	GLY_336@N	145169	0.0306	2.8904	152.901
VAL_255@O	ALA_257@H	ALA_257@N	145072	0.0305	2.8747	146.296
ASP_511@O	VAL_513@H	VAL_513@N	145015	0.0305	2.8567	147.274
GLU_322@OE2	VAL_323@H	VAL_323@N	144969	0.0305	2.8215	148.971
HIE_445@O	ASP_448@H	ASP_448@N	144899	0.0305	2.9005	152.669
ASN_435@O	ARG_19@HH12	ARG_19@NH1	144730	0.0305	2.8336	153.417
GLU_391@OE2	LYS_460@HZ1	LYS_460@NZ	144664	0.0305	2.7952	157.37
LYS_260@O	ASN_346@HD21	ASN_346@ND2	144663	0.0305	2.8356	157.457
GLY_457@O	GLN_461@HE22	GLN_461@NE2	144423	0.0304	2.8595	158.931
GLU_31@OE2	ASN_28@HD22	ASN_28@ND2	144352	0.0304	2.8311	161.711
GLN_338@O	SER_342@HG	SER_342@OG	143624	0.0302	2.7318	160.406
ALA_101@O	LEU_104@H	LEU_104@N	143585	0.0302	2.9138	145.547
ASN_334@OD1	SER_337@H	SER_337@N	143578	0.0302	2.8897	160.768
GLU_196@OE2	ASN_226@HD21	ASN_226@ND2	143555	0.0302	2.8344	161.364
GLU_424@O	GLN_428@HE22	GLN_428@NE2	143511	0.0302	2.836	157.925
GLU_393@OE2	ARG_9@HH12	ARG_9@NH1	143504	0.0302	2.7957	157.314
THR_25@O	SER_337@HG	SER_337@OG	143282	0.0302	2.7324	161.378
ARG_194@O	TRP_197@H	TRP_197@N	143242	0.0302	2.8834	144.702
GLU_111@OE1	ARG_214@HH21	ARG_214@NH2	143052	0.0301	2.803	151.489
GLU_13@OE1	GLN_441@HE22	GLN_441@NE2	142830	0.0301	2.8211	162.109
ASP_86@OD2	MET_1@H2	MET_1@N	142790	0.0301	2.7937	151.159
SER_420@O	VAL_423@H	VAL_423@N	142762	0.0301	2.9035	143.784
GLU_391@OE1	LYS_460@HZ2	LYS_460@NZ	142736	0.03	2.7955	157.406
ASN_494@OD1	VAL_495@H	VAL_495@N	142715	0.03	2.8555	144.485
GLU_316@OE2	ARG_324@HH12	ARG_324@NH1	142659	0.03	2.8051	157.982
ALA_128@O	LEU_131@H	LEU_131@N	142570	0.03	2.9007	145.731
ASN_81@O	SER_84@H	SER_84@N	142495	0.03	2.9124	153.202
GLU_391@OE2	LYS_460@HZ2	LYS_460@NZ	142466	0.03	2.7949	157.391
ARG_392@O	ALA_395@H	ALA_395@N	142307	0.03	2.9019	147.523
GLU_120@OE2	ARG_119@HH11	ARG_119@NH1	142210	0.0299	2.8054	156.054
GLN_100@O	GLN_100@HE22	GLN_100@NE2	142091	0.0299	2.8589	150.172
MET_56@O	GLN_431@HE21	GLN_431@NE2	142061	0.0299	2.8725	152.804
ALA_515@OXT	ARG_472@HH21	ARG_472@NH2	141784	0.0298	2.8013	153.995
GLU_391@OE2	LYS_460@HZ3	LYS_460@NZ	141779	0.0298	2.7948	157.37
GLU_52@OE1	ARG_9@HH22	ARG_9@NH2	141777	0.0298	2.8054	156.787
GLU_391@OE1	LYS_460@HZ1	LYS_460@NZ	141681	0.0298	2.7957	157.397
ASP_86@OD2	MET_1@H3	MET_1@N	141514	0.0298	2.7941	151.132
ASN_81@OD1	GLN_428@HE21	GLN_428@NE2	141478	0.0298	2.8493	154.904
GLU_111@OE2	ARG_214@HH21	ARG_214@NH2	141204	0.0297	2.8049	151.231
TYR_193@OH	HIE_185@HE2	HIE_185@NE2	141132	0.0297	2.8851	153.255
SER_420@O	ASN_88@HD22	ASN_88@ND2	141063	0.0297	2.8394	159.642
ASP_333@OD1	ARG_67@H	ARG_67@N	140960	0.0297	2.8837	164.834
ASP_256@OD2	ARG_377@H	ARG_377@N	140901	0.0297	2.8563	160.861
ASP_86@OD2	MET_1@H1	MET_1@N	140698	0.0296	2.7933	151.132
ASP_83@OD1	LYS_282@HZ3	LYS_282@NZ	140690	0.0296	2.7946	153.68
ASP_514@OD1	ARG_472@HH12	ARG_472@NH1	140634	0.0296	2.7996	158.254
ASN_339@OD1	GLN_173@HE21	GLN_173@NE2	140562	0.0296	2.8366	160.601
GLY_68@O	ARG_32@HH12	ARG_32@NH1	140353	0.0295	2.8273	156.524
GLU_391@OE1	LYS_460@HZ3	LYS_460@NZ	140345	0.0295	2.7956	157.423
GLU_31@OE1	ASN_28@HD22	ASN_28@ND2	140242	0.0295	2.8315	161.766
SER_264@OG	ASP_302@H	ASP_302@N	140125	0.0295	2.8959	161.841
PRO_85@O	ASN_88@HD22	ASN_88@ND2	139909	0.0295	2.8346	161.015
GLU_196@OE1	ASN_226@HD21	ASN_226@ND2	139618	0.0294	2.8343	161.139
SER_162@OG	ASN_346@HD21	ASN_346@ND2	139608	0.0294	2.8897	162.882
ALA_265@O	GLN_127@HE21	GLN_127@NE2	138595	0.0292	2.8604	158.257
ILE_280@O	SER_79@HG	SER_79@OG	138398	0.0291	2.7514	160.733
THR_82@O	ASN_178@HD22	ASN_178@ND2	138222	0.0291	2.8365	159.88
ASN_334@OD1	SER_337@HG	SER_337@OG	138034	0.0291	2.7489	155.721
ASP_341@OD1	LYS_318@HZ1	LYS_318@NZ	137943	0.029	2.7813	158.143
GLU_176@OE1	GLN_270@HE21	GLN_270@NE2	137603	0.029	2.8208	161.783
ASP_256@OD1	ARG_377@H	ARG_377@N	137298	0.0289	2.8562	161.393
ILE_297@O	MET_300@H	MET_300@N	137243	0.0289	2.9	146.048
ASP_83@OD2	ARG_277@HH11	ARG_277@NH1	137223	0.0289	2.7795	154.368
GLU_166@OE2	ASN_339@HD21	ASN_339@ND2	136924	0.0288	2.8134	161.188
ASP_83@OD1	LYS_282@HZ1	LYS_282@NZ	136918	0.0288	2.7925	153.904
GLU_233@OE1	GLN_229@HE22	GLN_229@NE2	136871	0.0288	2.8335	162.402
ASP_83@OD2	LYS_282@HZ2	LYS_282@NZ	136830	0.0288	2.8044	154.506
ASN_81@OD1	GLN_173@HE21	GLN_173@NE2	136786	0.0288	2.8572	156.339
GLU_393@OE1	ARG_9@HH12	ARG_9@NH1	136697	0.0288	2.7961	157.265
ASN_177@OD1	ASN_339@HD22	ASN_339@ND2	136657	0.0288	2.8532	158.995
GLU_38@OE2	ARG_37@HH11	ARG_37@NH1	136489	0.0287	2.7948	158.075
GLU_355@OE1	TYR_499@HH	TYR_499@OH	136355	0.0287	2.7248	161.597
ALA_7@O	GLN_441@HE21	GLN_441@NE2	136170	0.0287	2.8399	156.421
VAL_73@O	ARG_66@HH22	ARG_66@NH2	136127	0.0287	2.8341	152.056
GLN_170@OE1	THR_340@HG1	THR_340@OG1	135732	0.0286	2.7279	159.371
ASP_514@OD2	ARG_472@HH22	ARG_472@NH2	135718	0.0286	2.7997	158.833
GLN_388@OE1	ARG_392@HH21	ARG_392@NH2	135086	0.0284	2.8066	154.951
LYS_60@O	SER_77@HG	SER_77@OG	135021	0.0284	2.7328	160.733
ASP_302@O	GLN_266@H	GLN_266@N	134913	0.0284	2.8788	160.85
PHE_500@O	PHE_505@H	PHE_505@N	134717	0.0284	2.8818	145.857
ALA_398@O	SER_402@HG	SER_402@OG	134577	0.0283	2.7525	160.039
ASP_83@OD1	LYS_282@HZ2	LYS_282@NZ	134166	0.0282	2.7926	153.112
GLU_424@OE1	ASN_76@HD22	ASN_76@ND2	134060	0.0282	2.8351	159.953
ASP_447@OD1	SER_402@HG	SER_402@OG	133977	0.0282	2.6717	162.881
ALA_4@O	ARG_9@HH21	ARG_9@NH2	133773	0.0282	2.8132	154.33
GLU_166@OE2	THR_340@HG1	THR_340@OG1	133731	0.0282	2.6951	162.941
GLU_294@OE1	ARG_295@H	ARG_295@N	133641	0.0281	2.8462	147.03
GLU_31@OE1	ARG_324@HH22	ARG_324@NH2	133598	0.0281	2.8014	158.053
LEU_232@O	SER_235@HG	SER_235@OG	133383	0.0281	2.7349	159.546
GLU_38@OE1	ARG_37@HH11	ARG_37@NH1	133380	0.0281	2.7959	158.078
ARG_67@O	ARG_32@HH11	ARG_32@NH1	133314	0.0281	2.8384	151.853
GLU_36@OE1	ARG_47@HH22	ARG_47@NH2	133142	0.028	2.8086	151.734
PRO_399@O	SER_401@H	SER_401@N	133072	0.028	2.8621	145.062
GLN_8@OE1	TRP_430@HE1	TRP_430@NE1	132806	0.028	2.8514	156.052
GLY_199@O	GLN_203@HE22	GLN_203@NE2	132709	0.0279	2.8599	158.735
GLU_316@OE1	ARG_325@HH22	ARG_325@NH2	132615	0.0279	2.8099	157.145
VAL_65@O	GLY_68@H	GLY_68@N	132506	0.0279	2.8756	151.224
GLU_31@OE1	ARG_325@HH11	ARG_325@NH1	132490	0.0279	2.8125	156.965
ASN_494@OD1	ASP_496@H	ASP_496@N	132263	0.0278	2.8985	159.14
ASP_248@O	GLN_100@HE22	GLN_100@NE2	131560	0.0277	2.8734	157.37
ASP_514@OD2	ALA_515@H	ALA_515@N	131421	0.0277	2.8448	145.099
ASP_341@OD1	LYS_318@HZ3	LYS_318@NZ	131381	0.0277	2.7813	157.799
GLU_36@OE2	ARG_47@HH22	ARG_47@NH2	131234	0.0276	2.8086	151.929
ILE_440@O	HIE_443@H	HIE_443@N	130974	0.0276	2.8941	149.37
GLU_393@OE1	SER_402@H	SER_402@N	130570	0.0275	2.8629	157.329
GLU_316@OE1	ASN_28@HD21	ASN_28@ND2	130526	0.0275	2.8394	162.655
GLN_100@OE1	ASN_419@HD22	ASN_419@ND2	130487	0.0275	2.8479	161.165
ASP_121@OD2	LYS_260@HZ3	LYS_260@NZ	130416	0.0275	2.7983	154.354
GLU_434@O	ARG_19@HH22	ARG_19@NH2	130169	0.0274	2.8274	156.714
ASN_334@OD1	GLN_338@HE22	GLN_338@NE2	130166	0.0274	2.8483	159.988
THR_340@O	ASN_346@HD22	ASN_346@ND2	130018	0.0274	2.8317	159.994
GLU_13@OE2	GLN_441@HE21	GLN_441@NE2	130014	0.0274	2.8333	160.608
ASP_189@O	ARG_230@HE	ARG_230@NE	129807	0.0273	2.8613	149.816
GLU_97@OE2	LYS_254@HZ3	LYS_254@NZ	129182	0.0272	2.7858	155.319
THR_82@OG1	SER_335@HG	SER_335@OG	128987	0.0272	2.7777	159.664
GLU_454@OE2	LYS_453@HZ1	LYS_453@NZ	128928	0.0271	2.7745	157.168
GLN_361@OE1	GLN_358@HE21	GLN_358@NE2	128926	0.0271	2.8499	147.833
ASP_121@OD2	LYS_260@HZ2	LYS_260@NZ	128898	0.0271	2.7997	154.211
GLY_68@O	GLY_70@H	GLY_70@N	128867	0.0271	2.8541	146.818
GLU_369@OE1	ARG_472@HH21	ARG_472@NH2	128863	0.0271	2.7976	156.116
ASP_121@OD2	LYS_260@HZ1	LYS_260@NZ	128741	0.0271	2.7992	154.255
GLN_173@OE1	THR_340@HG1	THR_340@OG1	128677	0.0271	2.7599	161.855
ASP_75@OD1	LYS_318@HZ3	LYS_318@NZ	128228	0.027	2.7677	154.738
GLU_294@OE2	ARG_295@H	ARG_295@N	128167	0.027	2.8467	146.673
VAL_323@O	GLY_326@H	GLY_326@N	128164	0.027	2.8838	154.844
GLU_233@OE2	GLN_229@HE22	GLN_229@NE2	128121	0.027	2.8335	162.422
GLU_454@OE2	LYS_453@HZ3	LYS_453@NZ	127938	0.0269	2.7748	157.219
ASP_496@O	ILE_498@H	ILE_498@N	127897	0.0269	2.8408	148.125
GLU_111@OE2	SER_507@HG	SER_507@OG	127688	0.0269	2.6664	164.03
ASP_501@O	PHE_505@H	PHE_505@N	127627	0.0269	2.8763	159.464
GLU_111@OE2	ARG_214@HE	ARG_214@NE	127240	0.0268	2.8155	153.321
GLN_480@O	ASN_484@HD22	ASN_484@ND2	127121	0.0268	2.8447	159.194
MET_163@O	GLU_166@H	GLU_166@N	127055	0.0267	2.8844	143.816
GLU_322@OE2	ARG_290@HH12	ARG_290@NH1	127037	0.0267	2.8158	153.73
ASP_83@OD2	SER_79@HG	SER_79@OG	126982	0.0267	2.681	163.694
ASP_75@OD1	LYS_318@HZ1	LYS_318@NZ	126610	0.0267	2.7708	154.859
PHE_96@O	GLN_100@HE22	GLN_100@NE2	126563	0.0266	2.8529	160.765
GLY_336@O	GLN_173@HE21	GLN_173@NE2	126560	0.0266	2.8701	156.416
GLU_97@OE2	LYS_254@HZ2	LYS_254@NZ	126462	0.0266	2.7842	155.52
GLU_13@OE1	GLN_441@HE21	GLN_441@NE2	126401	0.0266	2.833	160.621
GLU_454@OE2	LYS_453@HZ2	LYS_453@NZ	126108	0.0265	2.7744	157.158
HIE_185@ND1	ARG_175@HH21	ARG_175@NH2	126093	0.0265	2.9029	156.595
ASP_75@OD1	LYS_318@HZ2	LYS_318@NZ	126035	0.0265	2.775	154.861
MET_421@O	GLU_424@H	GLU_424@N	125967	0.0265	2.8939	143.189
GLU_454@OE1	LYS_453@HZ3	LYS_453@NZ	125918	0.0265	2.774	157.189
GLN_270@OE1	TYR_269@H	TYR_269@N	125871	0.0265	2.8668	150.087
HIE_160@ND1	GLN_116@HE21	GLN_116@NE2	125789	0.0265	2.9138	159.391
GLN_431@OE1	ARG_19@HH21	ARG_19@NH2	125780	0.0265	2.8153	154.2
THR_263@O	ALA_265@H	ALA_265@N	125742	0.0265	2.8507	145.627
GLU_322@OE2	ARG_324@HH11	ARG_324@NH1	125686	0.0265	2.792	156.465
TRP_455@O	ASP_458@H	ASP_458@N	125459	0.0264	2.8977	143.654
GLU_483@O	GLN_487@HE22	GLN_487@NE2	125343	0.0264	2.8633	158.587
LEU_315@O	VAL_321@H	VAL_321@N	125227	0.0264	2.9221	157.564
SER_342@O	ASN_349@HD22	ASN_349@ND2	125221	0.0264	2.8524	157.931
ASP_341@OD1	LYS_60@HZ3	LYS_60@NZ	125106	0.0263	2.7809	156.167
ASP_341@OD1	LYS_318@HZ2	LYS_318@NZ	125090	0.0263	2.7807	157.942
GLU_271@OE1	ARG_175@HH22	ARG_175@NH2	125042	0.0263	2.8228	155.147
SER_6@OG	ARG_9@H	ARG_9@N	124844	0.0263	2.9018	151.673
ALA_515@OXT	ARG_472@HE	ARG_472@NE	124837	0.0263	2.8258	154.676
ARG_66@O	GLY_70@H	GLY_70@N	124660	0.0262	2.8921	157.565
GLU_31@OE1	ARG_324@HH12	ARG_324@NH1	124601	0.0262	2.8105	157.22
GLU_97@OE2	LYS_254@HZ1	LYS_254@NZ	124584	0.0262	2.786	155.341
SER_235@OG	TYR_245@HH	TYR_245@OH	124289	0.0262	2.8013	163.248
ARG_66@O	GLY_68@H	GLY_68@N	124273	0.0262	2.8611	147.06
GLU_454@OE1	LYS_453@HZ1	LYS_453@NZ	123970	0.0261	2.7741	157.143
ASN_349@OD1	TRP_439@HE1	TRP_439@NE1	123943	0.0261	2.8309	157.844
GLU_52@OE2	ARG_9@HH22	ARG_9@NH2	123904	0.0261	2.8093	156.192
GLU_454@OE1	LYS_453@HZ2	LYS_453@NZ	123886	0.0261	2.774	157.072
ALA_140@O	SER_143@HG	SER_143@OG	123825	0.0261	2.7357	160.57
GLU_355@OE1	LYS_512@HZ1	LYS_512@NZ	123813	0.0261	2.8003	155.997
ASP_379@OD1	LYS_254@HZ2	LYS_254@NZ	123790	0.0261	2.8081	154.096
ASP_344@OD2	ASN_435@HD21	ASN_435@ND2	123668	0.026	2.8231	158.337
ASP_75@OD2	SER_77@H	SER_77@N	123635	0.026	2.8884	156.986
ASP_121@OD1	LYS_260@HZ2	LYS_260@NZ	123533	0.026	2.8079	154.713
ARG_384@O	GLN_388@HE22	GLN_388@NE2	123457	0.026	2.8589	160.601
GLU_355@OE1	LYS_512@HZ3	LYS_512@NZ	123377	0.026	2.8002	155.956
GLU_58@OE1	GLN_80@HE22	GLN_80@NE2	123354	0.026	2.8313	161.006
GLN_408@O	GLN_408@HE22	GLN_408@NE2	123333	0.026	2.8506	150.96
GLN_441@OE1	ARG_9@HH11	ARG_9@NH1	123218	0.0259	2.8287	158.049
THR_263@O	ARG_267@HH11	ARG_267@NH1	123212	0.0259	2.8334	159.372
ASP_75@OD1	GLN_431@HE21	GLN_431@NE2	123180	0.0259	2.8468	157.168
GLU_111@OE1	ARG_214@HE	ARG_214@NE	122892	0.0259	2.8158	153.09
ASP_86@OD2	MET_259@H2	MET_259@N	122713	0.0258	2.792	151.19
ASP_248@OD2	HIE_418@HE2	HIE_418@NE2	122702	0.0258	2.832	156.048
GLU_355@OE2	LYS_512@HZ1	LYS_512@NZ	122623	0.0258	2.7991	155.836
ARG_230@O	GLU_233@H	GLU_233@N	122618	0.0258	2.9014	147.448
ASP_514@OD1	ALA_515@H	ALA_515@N	122616	0.0258	2.8451	145.065
GLN_385@O	GLN_388@H	GLN_388@N	122509	0.0258	2.9036	147.147
GLU_434@OE2	GLN_8@HE21	GLN_8@NE2	122426	0.0258	2.836	158.917
ASP_344@OD2	LYS_318@HZ3	LYS_318@NZ	122270	0.0257	2.7846	156.86
ASP_86@OD2	MET_259@H3	MET_259@N	122106	0.0257	2.7918	151.115
ASP_86@OD1	ARG_66@HH22	ARG_66@NH2	121769	0.0256	2.8112	158.001
SER_84@OG	ASP_86@H	ASP_86@N	121763	0.0256	2.9185	152.064
GLU_355@OE2	LYS_512@HZ2	LYS_512@NZ	121309	0.0255	2.799	155.783
ASP_86@O	GLN_80@HE21	GLN_80@NE2	121269	0.0255	2.8473	154.743
ASP_344@OD2	LYS_318@HZ2	LYS_318@NZ	121195	0.0255	2.7832	156.581
ALA_262@O	GLN_266@H	GLN_266@N	121097	0.0255	2.8726	158.004
ASP_83@OD2	LYS_282@HZ3	LYS_282@NZ	121064	0.0255	2.8052	153.842
GLU_271@OE2	GLN_266@HE22	GLN_266@NE2	121019	0.0255	2.817	161.627
GLU_355@OE1	LYS_512@HZ2	LYS_512@NZ	120837	0.0254	2.8006	155.909
GLU_31@OE2	ARG_324@HH22	ARG_324@NH2	120473	0.0254	2.8028	158.721
ASP_83@OD1	ARG_277@HH11	ARG_277@NH1	120417	0.0254	2.7769	153.996
ASP_121@OD1	LYS_260@HZ3	LYS_260@NZ	120092	0.0253	2.8081	154.669
SER_420@OG	ASN_91@H	ASN_91@N	120057	0.0253	2.9031	160.699
ASP_86@OD2	MET_259@H1	MET_259@N	119994	0.0253	2.7919	151.275
ASP_253@O	VAL_255@H	VAL_255@N	119849	0.0252	2.8646	147.718
GLU_355@OE2	LYS_512@HZ3	LYS_512@NZ	119684	0.0252	2.7993	155.815
GLU_491@OE2	ASN_494@HD21	ASN_494@ND2	119610	0.0252	2.8309	161.243
ILE_313@O	GLU_316@H	GLU_316@N	119301	0.0251	2.9018	142.871
ASP_341@OD1	LYS_60@HZ2	LYS_60@NZ	119298	0.0251	2.7811	155.835
GLN_12@OE1	ARG_9@HH21	ARG_9@NH2	119245	0.0251	2.8206	151.249
TYR_285@O	TYR_72@HH	TYR_72@OH	119208	0.0251	2.7523	161.822
ALA_515@O	ARG_472@HH21	ARG_472@NH2	119009	0.0251	2.7984	154.938
ASP_75@OD2	LYS_318@HZ1	LYS_318@NZ	118956	0.025	2.7585	154.26
THR_340@O	SER_342@H	SER_342@N	118930	0.025	2.8627	146.187
ASP_379@OD1	LYS_254@HZ1	LYS_254@NZ	118894	0.025	2.8079	154.058
ASP_341@OD1	LYS_60@HZ1	LYS_60@NZ	118762	0.025	2.7802	155.832
ASP_379@OD1	LYS_254@HZ3	LYS_254@NZ	118614	0.025	2.8088	154.106
GLN_431@OE1	ASN_435@HD21	ASN_435@ND2	118455	0.0249	2.8465	156.024
LEU_373@O	LYS_469@HZ2	LYS_469@NZ	118325	0.0249	2.8408	152.84
LEU_373@O	LYS_469@HZ3	LYS_469@NZ	118261	0.0249	2.8411	152.798
GLN_173@O	GLU_176@H	GLU_176@N	118213	0.0249	2.886	147.253
ASP_344@OD2	LYS_318@HZ1	LYS_318@NZ	118158	0.0249	2.7849	156.456
GLU_176@OE1	SER_77@HG	SER_77@OG	117923	0.0248	2.6668	164.617
ASP_121@OD1	LYS_260@HZ1	LYS_260@NZ	117786	0.0248	2.8077	154.631
ASP_86@OD2	ARG_66@HH22	ARG_66@NH2	117698	0.0248	2.8121	157.493
ASP_83@OD2	LYS_282@HZ1	LYS_282@NZ	117603	0.0248	2.8045	154.141
GLU_316@OE2	ARG_325@HH22	ARG_325@NH2	117544	0.0247	2.809	156.669
ALA_257@O	ASN_108@HD21	ASN_108@ND2	117420	0.0247	2.8175	163.112
ASP_514@OD1	ARG_472@HH22	ARG_472@NH2	117381	0.0247	2.8022	157.986
ASN_81@O	ASN_178@HD21	ASN_178@ND2	117224	0.0247	2.8729	160.91
LEU_373@O	LYS_469@HZ1	LYS_469@NZ	117146	0.0247	2.8407	152.815
GLU_271@OE2	ARG_175@HH12	ARG_175@NH1	117108	0.0247	2.7941	158.44
VAL_255@O	LYS_228@HZ2	LYS_228@NZ	117099	0.0247	2.8181	155.339
SER_507@O	GLN_116@HE22	GLN_116@NE2	117056	0.0246	2.8435	157.613
GLU_97@OE1	LYS_254@HZ3	LYS_254@NZ	116844	0.0246	2.7881	154.989
GLU_97@OE1	LYS_254@HZ1	LYS_254@NZ	116839	0.0246	2.7855	154.987
ARG_488@O	GLU_491@H	GLU_491@N	116806	0.0246	2.9121	150.579
VAL_255@O	LYS_228@HZ1	LYS_228@NZ	116764	0.0246	2.8175	155.412
GLU_97@OE1	LYS_254@HZ2	LYS_254@NZ	116740	0.0246	2.7855	155.14
LEU_104@O	ASN_108@H	ASN_108@N	116557	0.0245	2.9294	157.012
GLY_244@O	TRP_181@HE1	TRP_181@NE1	116347	0.0245	2.8466	149.407
GLY_328@O	ARG_290@HE	ARG_290@NE	116342	0.0245	2.8497	150.456
ASN_88@OD1	SER_84@HG	SER_84@OG	116012	0.0244	2.7297	161.082
ASP_506@OD2	TRP_508@H	TRP_508@N	115779	0.0244	2.8804	160.377
ASN_81@O	CYS_90@H	CYS_90@N	115712	0.0244	2.8617	160.5
THR_82@OG1	ASN_178@HD21	ASN_178@ND2	115644	0.0243	2.8773	157.71
TRP_508@O	TYR_503@HH	TYR_503@OH	115591	0.0243	2.7384	161.533
ASP_86@OD2	ARG_66@HH11	ARG_66@NH1	115543	0.0243	2.8193	157.608
SER_77@O	ASN_339@HD22	ASN_339@ND2	115430	0.0243	2.8612	161.915
ASP_514@OD2	ARG_472@HH12	ARG_472@NH1	115147	0.0242	2.803	157.664
GLU_271@OE1	GLN_266@HE22	GLN_266@NE2	114984	0.0242	2.8172	161.465
ALA_515@O	ARG_214@HH22	ARG_214@NH2	114447	0.0241	2.8013	157.448
ASP_341@OD1	ARG_277@HH12	ARG_277@NH1	114059	0.024	2.8068	157.175
ASP_248@OD2	SER_249@HG	SER_249@OG	113913	0.024	2.7275	161.447
ASP_333@OD2	ASN_334@H	ASN_334@N	113772	0.024	2.8188	143.694
ASN_435@O	ARG_19@HH22	ARG_19@NH2	113380	0.0239	2.8336	155.107
ALA_515@OXT	ARG_214@HH21	ARG_214@NH2	113256	0.0238	2.8051	155.281
GLU_176@OE2	ARG_175@HH11	ARG_175@NH1	113223	0.0238	2.7695	156.893
ASP_75@OD2	LYS_318@HZ2	LYS_318@NZ	113206	0.0238	2.7595	154.047
ASP_83@OD1	SER_79@HG	SER_79@OG	113184	0.0238	2.6871	163.553
GLN_428@OE1	SER_342@HG	SER_342@OG	113147	0.0238	2.7226	159.916
VAL_255@O	LYS_228@HZ3	LYS_228@NZ	112952	0.0238	2.8183	155.385
ALA_265@O	ARG_267@HH11	ARG_267@NH1	112819	0.0238	2.8248	155.898
GLN_150@OE1	GLN_266@H	GLN_266@N	112804	0.0237	2.8754	160.576
TYR_499@O	GLN_358@HE21	GLN_358@NE2	112737	0.0237	2.8383	159.423
THR_306@OG1	THR_304@HG1	THR_304@OG1	112577	0.0237	2.8261	157.89
GLU_196@OE1	LYS_195@HZ1	LYS_195@NZ	112407	0.0237	2.7759	156.836
GLU_322@OE1	VAL_323@H	VAL_323@N	111745	0.0235	2.8279	149.233
GLU_225@O	GLN_229@HE22	GLN_229@NE2	111608	0.0235	2.8614	158.39
GLN_12@OE1	ARG_9@HE	ARG_9@NE	111418	0.0235	2.8513	151.387
ILE_182@O	HIE_185@H	HIE_185@N	111415	0.0235	2.8995	145.844
GLU_196@OE2	LYS_195@HZ3	LYS_195@NZ	111339	0.0234	2.7758	156.903
PHE_168@O	SER_171@HG	SER_171@OG	111309	0.0234	2.7423	159.718
SER_146@O	GLN_150@HE22	GLN_150@NE2	111235	0.0234	2.8571	158.74
GLU_296@OE2	ARG_295@HH11	ARG_295@NH1	111092	0.0234	2.7962	157.62
ASP_341@OD2	LYS_60@HZ2	LYS_60@NZ	110896	0.0233	2.7846	155.675
GLU_111@OE1	SER_507@HG	SER_507@OG	110837	0.0233	2.6698	163.669
GLU_196@OE1	LYS_195@HZ3	LYS_195@NZ	110774	0.0233	2.7759	156.759
GLU_393@OE2	GLN_12@HE22	GLN_12@NE2	110565	0.0233	2.8462	158.853
ASP_278@OD2	ARG_277@HH21	ARG_277@NH2	110325	0.0232	2.8009	151.185
ASP_344@OD1	LYS_318@HZ2	LYS_318@NZ	110105	0.0232	2.7858	156.779
GLU_434@OE1	TRP_430@HE1	TRP_430@NE1	109980	0.0232	2.8327	153.162
ASP_75@OD2	LYS_318@HZ3	LYS_318@NZ	109935	0.0231	2.7584	154.285
GLU_166@OE2	ARG_169@HH12	ARG_169@NH1	109907	0.0231	2.7999	157.615
GLU_491@OE1	ASN_494@HD21	ASN_494@ND2	109805	0.0231	2.8323	161.418
GLU_196@OE2	LYS_195@HZ1	LYS_195@NZ	109470	0.023	2.7762	156.821
ASN_484@OD1	ARG_488@HH21	ARG_488@NH2	109340	0.023	2.8313	152.39
GLU_271@O	GLN_183@HE21	GLN_183@NE2	109296	0.023	2.8617	160.789
GLU_403@OE2	ARG_452@HH11	ARG_452@NH1	109246	0.023	2.8512	149.486
GLU_196@OE2	LYS_195@HZ2	LYS_195@NZ	108952	0.0229	2.7762	156.768
ASP_86@OD2	GLN_173@HE21	GLN_173@NE2	108638	0.0229	2.8244	163.923
ASP_344@OD1	LYS_318@HZ1	LYS_318@NZ	108528	0.0228	2.7866	156.349
LEU_232@O	SER_235@H	SER_235@N	108521	0.0228	2.9019	147.488
GLN_127@O	GLN_130@H	GLN_130@N	108408	0.0228	2.8964	144.872
ASN_435@OD1	ARG_19@HH21	ARG_19@NH2	108378	0.0228	2.8234	153.991
GLU_13@OE1	GLU_403@H	GLU_403@N	108226	0.0228	2.8926	162.445
LEU_362@O	ASN_366@H	ASN_366@N	108001	0.0227	2.9246	157.019
GLU_13@O	ALA_16@H	ALA_16@N	107950	0.0227	2.8957	143.219
ASP_248@OD1	SER_249@HG	SER_249@OG	107946	0.0227	2.7265	161.521
GLN_80@OE1	THR_82@HG1	THR_82@OG1	107915	0.0227	2.7356	159.022
GLU_196@OE1	LYS_195@HZ2	LYS_195@NZ	107806	0.0227	2.7758	156.885
ASN_349@O	TYR_499@HH	TYR_499@OH	107478	0.0226	2.756	155.948
ASN_484@OD1	ARG_488@HE	ARG_488@NE	107390	0.0226	2.8473	153.185
SER_444@OG	GLN_8@HE22	GLN_8@NE2	107202	0.0226	2.8793	159.298
ASN_177@O	LYS_282@HZ2	LYS_282@NZ	107081	0.0225	2.8108	147.007
ASN_334@OD1	ASN_76@HD21	ASN_76@ND2	106899	0.0225	2.841	159.38
SER_444@O	ASP_447@H	ASP_447@N	106855	0.0225	2.9169	154.672
ALA_515@O	ARG_214@HH11	ARG_214@NH1	106765	0.0225	2.8116	157.246
ASP_341@OD2	LYS_60@HZ1	LYS_60@NZ	106579	0.0224	2.7847	155.824
GLU_296@OE1	ARG_295@HH11	ARG_295@NH1	106471	0.0224	2.7964	157.352
ILE_498@O	ASN_494@HD22	ASN_494@ND2	106128	0.0223	2.8617	149.836
TYR_241@O	TYR_245@HH	TYR_245@OH	106029	0.0223	2.7841	162.336
ASP_344@OD1	ASN_435@HD22	ASN_435@ND2	105978	0.0223	2.805	162.018
ALA_351@O	ASN_346@HD22	ASN_346@ND2	105796	0.0223	2.8352	158.816
ASP_341@OD2	LYS_60@HZ3	LYS_60@NZ	105495	0.0222	2.785	155.669
GLU_355@OE1	ASN_161@HD22	ASN_161@ND2	105478	0.0222	2.8053	155.631
GLY_30@O	ARG_32@HH11	ARG_32@NH1	105307	0.0222	2.8249	155.477
ASP_344@OD1	ASN_435@HD21	ASN_435@ND2	105256	0.0222	2.826	159.251
GLN_80@O	ASN_88@H	ASN_88@N	105229	0.0222	2.8635	159.993
ASP_514@OD1	LYS_486@HZ1	LYS_486@NZ	105016	0.0221	2.8025	153.838
GLN_431@OE1	LYS_60@HZ3	LYS_60@NZ	104931	0.0221	2.8062	155.06
GLU_355@OE2	ASN_161@HD22	ASN_161@ND2	104919	0.0221	2.8041	155.619
GLU_369@OE2	ARG_472@HH21	ARG_472@NH2	104848	0.0221	2.7992	155.049
GLN_170@OE1	SER_342@HG	SER_342@OG	104747	0.0221	2.7377	160.893
ALA_515@OXT	ARG_214@HH22	ARG_214@NH2	104618	0.022	2.8047	157.339
ASP_75@OD2	ARG_427@HH12	ARG_427@NH1	104590	0.022	2.809	152.919
GLU_64@OE2	SER_79@H	SER_79@N	104513	0.022	2.8616	158.74
ASP_333@OD1	ASN_334@H	ASN_334@N	104430	0.022	2.8183	143.792
GLN_173@OE1	THR_340@H	THR_340@N	104292	0.022	2.8633	154.743
LYS_486@O	LEU_489@H	LEU_489@N	104219	0.0219	2.9025	144.127
LEU_115@O	LYS_211@HZ2	LYS_211@NZ	103867	0.0219	2.8399	153.052
GLU_64@O	ARG_66@H	ARG_66@N	103852	0.0219	2.8769	146.368
LEU_115@O	LYS_211@HZ1	LYS_211@NZ	103572	0.0218	2.8397	153.033
ASN_419@O	VAL_423@H	VAL_423@N	103559	0.0218	2.9184	159.819
ASN_91@OD1	GLY_94@H	GLY_94@N	103361	0.0218	2.8666	149.323
LEU_246@O	TRP_250@H	TRP_250@N	103319	0.0218	2.8832	160.393
GLU_415@O	LYS_254@HZ1	LYS_254@NZ	103206	0.0217	2.8297	153.391
GLU_31@OE2	ARG_324@HH12	ARG_324@NH1	102888	0.0217	2.8104	157.67
ALA_257@OXT	LYS_217@HZ1	LYS_217@NZ	102870	0.0217	2.7964	154.227
ARG_67@O	ALA_69@H	ALA_69@N	102852	0.0217	2.8546	146.488
ASN_81@OD1	THR_340@HG1	THR_340@OG1	102707	0.0216	2.7573	160.312
ASP_256@OD1	ARG_377@HH11	ARG_377@NH1	102637	0.0216	2.7923	158.449
ALA_398@O	SER_402@H	SER_402@N	102628	0.0216	2.8964	157.64
TYR_503@O	PHE_505@H	PHE_505@N	102622	0.0216	2.8651	145.132
GLY_244@O	THR_263@HG1	THR_263@OG1	102575	0.0216	2.8021	158.079
GLU_434@O	ARG_19@HH12	ARG_19@NH1	102561	0.0216	2.8131	153.421
ASN_76@O	ASN_76@HD22	ASN_76@ND2	102491	0.0216	2.8131	148.507
ASN_177@O	LYS_282@HZ3	LYS_282@NZ	102330	0.0215	2.8106	146.973
PHE_505@O	SER_507@H	SER_507@N	102095	0.0215	2.861	145.337
PRO_343@O	ASN_435@HD22	ASN_435@ND2	102075	0.0215	2.8457	154.474
ASP_86@OD2	ARG_67@HH11	ARG_67@NH1	102068	0.0215	2.8129	159.501
ASP_344@OD1	LYS_318@HZ3	LYS_318@NZ	102033	0.0215	2.7868	156.361
ALA_515@OXT	ARG_214@HH11	ARG_214@NH1	101880	0.0214	2.8137	157.549
GLU_355@OE2	TYR_499@HH	TYR_499@OH	101873	0.0214	2.6701	163.091
LEU_115@O	LYS_211@HZ3	LYS_211@NZ	101659	0.0214	2.8401	152.996
ASP_514@OD1	LYS_486@HZ3	LYS_486@NZ	101604	0.0214	2.8033	153.71
ASP_278@OD1	GLN_183@HE22	GLN_183@NE2	101526	0.0214	2.8366	157.385
ASN_177@O	LYS_282@HZ1	LYS_282@NZ	101164	0.0213	2.8108	146.909
GLN_431@OE1	LYS_60@HZ2	LYS_60@NZ	101130	0.0213	2.8061	154.991
GLN_388@O	GLN_388@HE22	GLN_388@NE2	101119	0.0213	2.8547	152.672
THR_82@O	ASP_86@H	ASP_86@N	100996	0.0213	2.8874	154.987
ASP_514@OD1	LYS_486@HZ2	LYS_486@NZ	100872	0.0212	2.8028	153.794
ILE_498@O	TYR_503@HH	TYR_503@OH	100797	0.0212	2.7522	162.217
GLU_166@OE1	THR_340@HG1	THR_340@OG1	100648	0.0212	2.6932	162.545
ASP_344@OD1	ARG_19@HH21	ARG_19@NH2	100589	0.0212	2.8028	158.841
ALA_515@O	ARG_214@HH21	ARG_214@NH2	100410	0.0211	2.808	154.844
GLN_338@OE1	ARG_277@HH22	ARG_277@NH2	100405	0.0211	2.8477	148
ASP_511@OD1	LYS_512@H	LYS_512@N	100340	0.0211	2.8268	145.171
ALA_257@OXT	LYS_217@HZ3	LYS_217@NZ	100322	0.0211	2.7968	153.921
ASP_189@O	ARG_230@HH11	ARG_230@NH1	100286	0.0211	2.8193	157.143
ASP_92@O	SER_249@HG	SER_249@OG	100279	0.0211	2.7402	159.864
GLU_322@OE1	ARG_325@H	ARG_325@N	99749	0.021	2.8528	158.461
ASP_83@OD1	ARG_277@HH22	ARG_277@NH2	99723	0.021	2.8101	156.735
ASP_514@OD2	LYS_486@HZ3	LYS_486@NZ	99402	0.0209	2.8039	153.591
ALA_515@O	ARG_472@HE	ARG_472@NE	99389	0.0209	2.8321	154.992
ALA_257@OXT	LYS_217@HZ2	LYS_217@NZ	99374	0.0209	2.7979	153.748
ASP_86@OD1	TRP_174@HE1	TRP_174@NE1	99349	0.0209	2.8423	151.563
THR_263@O	ARG_267@HE	ARG_267@NE	99348	0.0209	2.8324	156.443
ASP_248@OD1	HIE_418@HE2	HIE_418@NE2	99336	0.0209	2.8341	155.439
GLN_130@O	GLN_130@HE22	GLN_130@NE2	99309	0.0209	2.8538	152.898
SER_3@O	ARG_427@HH12	ARG_427@NH1	99272	0.0209	2.8288	147.924
ASP_514@OD2	LYS_486@HZ2	LYS_486@NZ	99265	0.0209	2.8027	153.606
ALA_375@O	LYS_469@HZ3	LYS_469@NZ	99165	0.0209	2.8161	151.607
ALA_375@O	LYS_469@HZ2	LYS_469@NZ	99129	0.0209	2.8163	151.67
THR_82@OG1	SER_77@HG	SER_77@OG	99103	0.0209	2.7771	159.482
ASP_86@OD1	ARG_67@HH22	ARG_67@NH2	99087	0.0209	2.8045	159.766
GLU_233@OE2	ARG_230@HH12	ARG_230@NH1	99024	0.0208	2.794	156.401
ASN_484@O	TRP_455@HE1	TRP_455@NE1	98963	0.0208	2.8853	159.642
ASN_76@OD1	GLY_78@H	GLY_78@N	98672	0.0208	2.8819	155.787
GLU_415@O	LYS_254@HZ2	LYS_254@NZ	98620	0.0208	2.8299	153.373
ALA_375@O	LYS_469@HZ1	LYS_469@NZ	98585	0.0208	2.8165	151.695
GLN_431@OE1	LYS_60@HZ1	LYS_60@NZ	98501	0.0207	2.8064	154.927
GLU_233@OE1	ARG_230@HH12	ARG_230@NH1	98458	0.0207	2.7932	156.654
ASP_212@O	ALA_215@H	ALA_215@N	98404	0.0207	2.8893	142.415
GLN_150@O	GLN_150@HE22	GLN_150@NE2	98376	0.0207	2.8485	151.001
PRO_509@O	VAL_513@H	VAL_513@N	98148	0.0207	2.8905	158.413
ALA_262@O	ALA_265@H	ALA_265@N	97940	0.0206	2.9007	153.824
GLU_289@OE2	ARG_66@HH22	ARG_66@NH2	97932	0.0206	2.8005	156.37
ILE_55@O	GLU_58@H	GLU_58@N	97672	0.0206	2.9039	142.296
PRO_26@O	ASN_28@HD22	ASN_28@ND2	97560	0.0205	2.87	157.856
TYR_269@O	VAL_272@H	VAL_272@N	97420	0.0205	2.8947	143.813
ASP_470@O	ALA_473@H	ALA_473@N	97377	0.0205	2.8901	142.458
ALA_262@O	ARG_169@HH21	ARG_169@NH2	97372	0.0205	2.8248	149.92
GLN_338@O	SER_342@H	SER_342@N	97368	0.0205	2.8823	153.96
ASP_278@OD2	ARG_277@HE	ARG_277@NE	97257	0.0205	2.8304	151.765
ASP_86@OD1	ARG_66@HH11	ARG_66@NH1	97243	0.0205	2.8213	157.484
GLN_266@OE1	THR_304@H	THR_304@N	97191	0.0205	2.8736	158.252
ASP_344@O	ASN_346@H	ASN_346@N	97179	0.0205	2.8676	145.233
PHE_500@O	LEU_504@H	LEU_504@N	97112	0.0204	2.8786	155.317
GLY_78@O	GLN_173@HE21	GLN_173@NE2	97074	0.0204	2.8937	151.329
PHE_247@O	TRP_250@H	TRP_250@N	96994	0.0204	2.9172	158.607
ASP_514@OD2	LYS_486@HZ1	LYS_486@NZ	96869	0.0204	2.8045	153.36
TYR_499@O	ALA_351@H	ALA_351@N	96842	0.0204	2.8613	152.413
VAL_495@O	ASP_497@H	ASP_497@N	96684	0.0204	2.8706	146.886
ALA_257@OXT	ARG_377@HH11	ARG_377@NH1	96448	0.0203	2.8058	156.363
LYS_2@O	GLN_8@HE21	GLN_8@NE2	96436	0.0203	2.8571	159.107
SER_261@O	THR_263@H	THR_263@N	96374	0.0203	2.8654	146.077
ASP_83@OD1	ARG_277@HE	ARG_277@NE	96254	0.0203	2.8358	153.733
HIE_418@ND1	GLN_374@HE21	GLN_374@NE2	96045	0.0202	2.9163	160.252
SER_396@OG	ALA_398@H	ALA_398@N	95986	0.0202	2.9258	157.089
ASN_91@O	ALA_93@H	ALA_93@N	95700	0.0201	2.8391	146.435
ALA_257@O	ARG_377@HH11	ARG_377@NH1	95661	0.0201	2.8053	156.284
GLU_434@OE1	ASN_435@HD22	ASN_435@ND2	95646	0.0201	2.8066	149.725
GLU_415@O	LYS_254@HZ3	LYS_254@NZ	95440	0.0201	2.8304	153.461
PRO_509@O	TRP_479@HE1	TRP_479@NE1	95406	0.0201	2.8443	157.667
ASP_341@OD2	ARG_277@HH12	ARG_277@NH1	95269	0.0201	2.809	157.297
TYR_503@O	ASP_506@H	ASP_506@N	95204	0.02	2.904	155.878
VAL_272@O	MET_275@H	MET_275@N	95018	0.02	2.8884	142.382
ASP_458@O	GLN_461@H	GLN_461@N	95014	0.02	2.8874	141.403
GLU_133@OE1	LYS_202@HZ3	LYS_202@NZ	94888	0.02	2.7986	158.206
VAL_14@O	MET_17@H	MET_17@N	94654	0.0199	2.8912	142.244
ASP_75@OD1	TYR_72@HH	TYR_72@OH	94145	0.0198	2.7157	161.785
GLN_338@OE1	ASN_334@H	ASN_334@N	94072	0.0198	2.8911	162.465
LEU_332@O	GLN_338@HE21	GLN_338@NE2	93955	0.0198	2.8477	150.555
MET_383@O	ALA_386@H	ALA_386@N	93954	0.0198	2.9026	143.076
LEU_153@O	ALA_156@H	ALA_156@N	93949	0.0198	2.886	141.498
GLU_176@OE1	ARG_175@HH21	ARG_175@NH2	93787	0.0197	2.7759	153.519
GLY_142@O	GLU_145@H	GLU_145@N	93753	0.0197	2.905	151.837
GLU_176@OE1	ARG_175@HH11	ARG_175@NH1	93737	0.0197	2.7717	157.134
ASN_88@O	CYS_90@H	CYS_90@N	93662	0.0197	2.8105	147.404
ASP_448@OD1	LYS_2@HZ3	LYS_2@NZ	93338	0.0197	2.8007	159.505
LYS_60@O	ASN_81@HD21	ASN_81@ND2	93231	0.0196	2.8689	159.831
GLU_133@OE1	LYS_202@HZ2	LYS_202@NZ	92978	0.0196	2.7996	158.175
GLU_133@OE1	LYS_202@HZ1	LYS_202@NZ	92965	0.0196	2.7991	158.168
GLU_133@OE2	LYS_202@HZ2	LYS_202@NZ	92949	0.0196	2.7997	158.221
GLU_434@OE2	TRP_430@HE1	TRP_430@NE1	92902	0.0196	2.8346	153.094
SER_342@OG	ASN_339@HD21	ASN_339@ND2	92858	0.0195	2.8688	159.381
GLU_133@OE2	LYS_202@HZ1	LYS_202@NZ	92698	0.0195	2.7995	158.184
ASP_190@O	SER_144@HG	SER_144@OG	92503	0.0195	2.7761	156.826
GLN_222@O	GLN_222@HE22	GLN_222@NE2	92492	0.0195	2.8724	149.452
LYS_260@O	SER_264@H	SER_264@N	92448	0.0195	2.861	156.629
LEU_490@O	ASN_494@HD21	ASN_494@ND2	92431	0.0195	2.8405	160.006
ASP_86@O	ASN_88@H	ASN_88@N	92393	0.0195	2.8535	145.673
GLY_61@O	ASN_76@H	ASN_76@N	92363	0.0194	2.8828	154.087
ASP_86@OD1	MET_1@H3	MET_1@N	92274	0.0194	2.8018	150.669
ASN_286@OD1	ARG_32@HH21	ARG_32@NH2	92264	0.0194	2.8205	154.253
SER_3@O	LYS_2@HZ1	LYS_2@NZ	92245	0.0194	2.8126	154.578
ASN_177@OD1	LYS_282@HZ3	LYS_282@NZ	92244	0.0194	2.8365	148.644
THR_48@OG1	THR_46@HG1	THR_46@OG1	92152	0.0194	2.8252	157.53
GLU_176@OE1	GLN_270@HE22	GLN_270@NE2	91891	0.0193	2.8062	159.944
ASP_333@O	SER_335@H	SER_335@N	91882	0.0193	2.871	146.548
SER_3@O	LYS_2@HZ3	LYS_2@NZ	91873	0.0193	2.8127	154.542
TYR_285@O	ASN_286@HD22	ASN_286@ND2	91391	0.0192	2.842	159.666
PRO_284@O	ASN_286@HD22	ASN_286@ND2	91339	0.0192	2.8614	154.436
ASP_86@OD1	MET_1@H2	MET_1@N	91303	0.0192	2.804	150.706
ASP_86@OD1	MET_1@H1	MET_1@N	91276	0.0192	2.8028	150.786
GLU_133@OE2	LYS_202@HZ3	LYS_202@NZ	91150	0.0192	2.7989	158.196
GLU_289@OE1	ARG_66@HH22	ARG_66@NH2	91105	0.0192	2.8018	156.362
SER_3@O	LYS_2@HZ2	LYS_2@NZ	91086	0.0192	2.8122	154.609
GLN_431@OE1	ARG_427@HH11	ARG_427@NH1	90962	0.0191	2.8102	156.487
ASP_92@OD1	SER_249@HG	SER_249@OG	90651	0.0191	2.6914	162.687
ASP_448@OD1	LYS_2@HZ1	LYS_2@NZ	90504	0.0191	2.7998	159.526
SER_335@OG	GLY_78@H	GLY_78@N	90405	0.019	2.9033	156.323
ASP_470@OD1	LYS_468@HZ2	LYS_468@NZ	90358	0.019	2.7975	158.471
GLU_294@OE1	ARG_309@HH22	ARG_309@NH2	90292	0.019	2.794	153.077
GLY_68@O	GLU_36@H	GLU_36@N	90231	0.019	2.8773	161.451
ASP_470@OD1	LYS_468@HZ1	LYS_468@NZ	90036	0.019	2.7986	158.485
ASP_86@O	LYS_260@HZ1	LYS_260@NZ	89497	0.0188	2.8255	153.994
SER_335@O	ASN_177@HD22	ASN_177@ND2	89410	0.0188	2.8484	160.361
GLN_374@OE1	THR_417@HG1	THR_417@OG1	89187	0.0188	2.7148	157.919
ASP_86@OD1	GLN_173@HE21	GLN_173@NE2	89180	0.0188	2.8186	163.632
ASP_121@O	LYS_124@H	LYS_124@N	89072	0.0188	2.8891	142.656
GLU_176@OE1	ARG_175@HE	ARG_175@NE	89015	0.0187	2.8289	151.34
ASP_75@OD2	GLN_431@HE21	GLN_431@NE2	89002	0.0187	2.8516	157.441
ASP_86@O	LYS_260@HZ3	LYS_260@NZ	88995	0.0187	2.8263	154.043
GLN_103@OE1	GLN_100@HE22	GLN_100@NE2	88856	0.0187	2.8442	150.825
ARG_452@O	TRP_455@H	TRP_455@N	88841	0.0187	2.8948	147.192
ASP_278@O	ILE_281@H	ILE_281@N	88662	0.0187	2.8988	144.998
GLU_64@OE1	SER_79@H	SER_79@N	88544	0.0186	2.8634	159.129
ASP_86@O	LYS_260@HZ2	LYS_260@NZ	88539	0.0186	2.8261	153.953
GLN_270@OE1	LYS_318@HZ2	LYS_318@NZ	88493	0.0186	2.8139	152.736
GLU_64@OE1	ARG_67@HH11	ARG_67@NH1	88444	0.0186	2.804	157.979
ASN_177@OD1	LYS_282@HZ2	LYS_282@NZ	88333	0.0186	2.8378	148.411
GLU_97@OE2	ASN_91@HD22	ASN_91@ND2	88282	0.0186	2.8123	160.517
GLN_266@OE1	GLN_270@HE21	GLN_270@NE2	88254	0.0186	2.8539	159.766
ALA_69@O	ARG_32@HH21	ARG_32@NH2	88200	0.0186	2.835	151.359
ARG_9@O	TYR_11@H	TYR_11@N	87995	0.0185	2.8593	143.564
GLU_393@OE1	GLN_12@HE22	GLN_12@NE2	87899	0.0185	2.8516	154.937
SER_404@OG	GLN_408@HE22	GLN_408@NE2	87842	0.0185	2.8883	148.695
[truncated: 16,391 more rows]

## Sheet: UxuR in complex with FrctA
#Acceptor	DonorH	Donor	Frames	Frac	AvgDist	AvgAng
GLN_103@O	SER_107@HG	SER_107@OG	4422520	0.9311	2.6944	162.164
GLN_362@O	SER_366@HG	SER_366@OG	4418609	0.9302	2.6989	162.181
LEU_363@O	ASN_367@HD22	ASN_367@ND2	4169675	0.8778	2.8098	161.774
LEU_104@O	ASN_108@HD22	ASN_108@ND2	4153155	0.8743	2.8085	161.647
ALA_156@O	THR_159@HG1	THR_159@OG1	4130368	0.8696	2.7548	163.974
ALA_415@O	THR_418@HG1	THR_418@OG1	4041944	0.8509	2.7524	163.557
ARG_102@O	GLU_106@H	GLU_106@N	3962929	0.8343	2.8257	155.699
ARG_361@O	GLU_365@H	GLU_365@N	3946265	0.8308	2.8265	155.604
AP1_407@O	HD1_411@H	HD1_411@N	3878953	0.8166	2.8494	164.623
ILE_109@O	ALA_113@H	ALA_113@N	3876514	0.8161	2.8413	159.93
LEU_280@O	THR_284@HG1	THR_284@OG1	3872402	0.8152	2.7437	162.656
LEU_477@O	GLN_481@H	GLN_481@N	3839986	0.8084	2.8463	161.177
ML1_518@O6	ARG_361@HH22	ARG_361@NH2	3832773	0.8069	2.8064	149.648
LEU_412@O	GLU_416@H	GLU_416@N	3828325	0.806	2.8532	164.011
ML1_518@O6	ARG_361@HH12	ARG_361@NH1	3796816	0.7993	2.7998	150.036
LEU_153@O	GLU_157@H	GLU_157@N	3793302	0.7986	2.8557	164.579
ML1_259@O6	ARG_102@HH12	ARG_102@NH1	3785254	0.7969	2.8065	150.389
ML1_259@O6	ARG_102@HH22	ARG_102@NH2	3751820	0.7899	2.805	150.141
ILE_368@O	ALA_372@H	ALA_372@N	3738089	0.787	2.8451	159.931
MET_408@O	LEU_412@H	LEU_412@N	3600673	0.758	2.8478	159.135
LEU_218@O	GLN_222@H	GLN_222@N	3575332	0.7527	2.8553	161.197
LEU_99@O	GLN_103@H	GLN_103@N	3551213	0.7476	2.8428	155.469
ILE_330@O	LEU_292@H	LEU_292@N	3539730	0.7452	2.8459	161.408
AP1_148@O	HD1_152@H	HD1_152@N	3454187	0.7272	2.8617	165.135
ILE_71@O	LEU_33@H	LEU_33@N	3440580	0.7243	2.8509	161.636
LEU_358@O	GLN_362@H	GLN_362@N	3367403	0.7089	2.8457	154.616
ALA_474@O	ALA_478@H	ALA_478@N	3344597	0.7041	2.8586	161.487
GLU_356@O	ASN_161@HD21	ASN_161@ND2	3303917	0.6956	2.8493	158.658
LYS_217@O	TRP_221@H	TRP_221@N	3261817	0.6867	2.8691	160.088
LEU_98@O	ARG_102@H	ARG_102@N	3233485	0.6807	2.8698	161.592
TYR_72@O	GLU_64@H	GLU_64@N	3203659	0.6745	2.8613	158.805
VAL_424@O	ARG_428@H	ARG_428@N	3195370	0.6727	2.8562	158.593
GLN_375@OE1	HIE_419@H	HIE_419@N	3194861	0.6726	2.839	159.832
GLU_97@O	ASN_420@HD21	ASN_420@ND2	3188242	0.6712	2.8514	157.396
VAL_165@O	ARG_169@H	ARG_169@N	3182853	0.6701	2.8528	159.124
ASP_200@O	ILE_204@H	ILE_204@N	3176645	0.6688	2.862	160.976
GLN_116@OE1	HIE_160@H	HIE_160@N	3162645	0.6658	2.8394	159.646
MET_149@O	LEU_153@H	LEU_153@N	3156092	0.6644	2.8563	159.373
TYR_331@O	GLU_323@H	GLU_323@N	3127624	0.6584	2.861	157.96
LEU_464@O	ILE_468@H	ILE_468@N	3113821	0.6555	2.8711	159.392
LEU_205@O	ILE_209@H	ILE_209@N	3102959	0.6533	2.8722	159.575
VAL_123@O	GLN_127@H	GLN_127@N	3100753	0.6528	2.8662	161.125
LEU_357@O	ARG_361@H	ARG_361@N	3097849	0.6522	2.873	161.265
ILE_122@O	ARG_126@H	ARG_126@N	3081510	0.6487	2.8685	159.774
ILE_381@O	ARG_385@H	ARG_385@N	3067627	0.6458	2.8682	159.984
ASP_459@O	ILE_463@H	ILE_463@N	3066812	0.6456	2.8678	160.764
VAL_382@O	GLN_386@H	GLN_386@N	3042129	0.6404	2.8658	161.194
LEU_21@O	THR_25@HG1	THR_25@OG1	3026300	0.6371	2.7472	161.959
LYS_476@O	TRP_480@H	TRP_480@N	3024584	0.6368	2.8746	160.184
ARG_230@O	PHE_234@H	PHE_234@N	3018984	0.6356	2.8617	160.871
VAL_50@O	LEU_54@H	LEU_54@N	2984937	0.6284	2.8757	158.643
VAL_309@O	LEU_313@H	LEU_313@N	2984813	0.6284	2.8739	157.689
ALA_215@O	ALA_219@H	ALA_219@N	2975537	0.6264	2.8682	161.684
GLY_274@O	ARG_278@H	ARG_278@N	2968083	0.6249	2.8663	159.164
LEU_57@O	LEU_62@H	LEU_62@N	2943681	0.6197	2.864	156.924
TYR_241@O	TYR_245@H	TYR_245@N	2935064	0.6179	2.8676	160.601
ALA_372@O	ALA_376@H	ALA_376@N	2924451	0.6157	2.8568	155.877
GLU_484@O	GLN_488@H	GLN_488@N	2914021	0.6135	2.8609	161.269
PHE_96@O	GLN_100@H	GLN_100@N	2895583	0.6096	2.8722	158.119
ALA_113@O	ALA_117@H	ALA_117@N	2869983	0.6042	2.8587	156.333
ARG_306@O	ARG_310@H	ARG_310@N	2867199	0.6036	2.8692	160.09
GLN_481@O	ASN_485@H	ASN_485@N	2833763	0.5966	2.8596	156.27
LEU_457@O	LYS_461@H	LYS_461@N	2831847	0.5962	2.8764	158.507
ASP_121@O	MET_125@H	MET_125@N	2809603	0.5915	2.8742	159.467
ASP_380@O	MET_384@H	MET_384@N	2804308	0.5904	2.8748	159.804
LEU_198@O	LYS_202@H	LYS_202@N	2801147	0.5897	2.8743	158.899
ARG_428@O	GLN_432@H	GLN_432@N	2769120	0.583	2.8627	159.8
ASP_471@O	ALA_475@H	ALA_475@N	2742112	0.5773	2.883	160.961
ASP_121@OD2	THR_118@HG1	THR_118@OG1	2730465	0.5748	2.701	162.71
GLU_106@O	ALA_110@H	ALA_110@N	2722003	0.5731	2.8807	158.808
ARG_169@O	GLN_173@H	GLN_173@N	2712601	0.5711	2.8592	157.704
GLU_365@O	ALA_369@H	ALA_369@N	2709453	0.5704	2.8821	159.418
ARG_47@O	ARG_51@H	ARG_51@N	2694119	0.5672	2.8724	160.481
PHE_355@O	GLN_359@H	GLN_359@N	2690599	0.5664	2.8745	158.043
GLU_106@OE1	HD1_152@HD1	HD1_152@ND1	2686132	0.5655	2.7595	157.677
ALA_207@O	ASP_212@H	ASP_212@N	2679897	0.5642	2.8708	158.589
GLU_225@O	GLN_229@H	GLN_229@N	2664827	0.561	2.8743	161.444
GLU_106@OE2	ARG_102@HE	ARG_102@NE	2642814	0.5564	2.7905	162.833
GLU_106@OE1	ARG_102@HH21	ARG_102@NH2	2641997	0.5562	2.8132	160.579
VAL_14@O	ILE_18@H	ILE_18@N	2637955	0.5554	2.8782	157.446
TYR_11@O	GLY_15@H	GLY_15@N	2594822	0.5463	2.8606	154.352
GLU_425@O	GLN_429@H	GLN_429@N	2584080	0.544	2.8518	159.218
ASP_380@OD2	THR_377@HG1	THR_377@OG1	2575965	0.5423	2.7006	162.744
TYR_270@O	GLY_274@H	GLY_274@N	2557439	0.5384	2.855	154.349
ALA_53@O	LEU_57@H	LEU_57@N	2549568	0.5368	2.8756	159.939
ILE_441@O	SER_445@HG	SER_445@OG	2548568	0.5365	2.7409	162.476
LYS_202@O	ALA_206@H	ALA_206@N	2539511	0.5346	2.8773	158.593
LEU_316@O	LEU_321@H	LEU_321@N	2530183	0.5327	2.874	155.192
GLU_323@O	TYR_331@H	TYR_331@N	2517272	0.53	2.8643	160.409
GLU_295@O	ALA_299@H	ALA_299@N	2508107	0.528	2.8776	160.291
GLY_15@O	ARG_19@H	ARG_19@N	2496451	0.5256	2.8749	158.681
ILE_182@O	SER_186@HG	SER_186@OG	2484197	0.523	2.747	162.281
LEU_490@O	SER_494@HG	SER_494@OG	2469329	0.5199	2.7525	162.912
ASP_212@O	ALA_216@H	ALA_216@N	2453503	0.5165	2.8886	161.069
MET_56@O	LYS_60@H	LYS_60@N	2452055	0.5162	2.8756	159.419
LEU_231@O	SER_235@HG	SER_235@OG	2445612	0.5149	2.7614	162.87
LYS_461@O	ALA_465@H	ALA_465@N	2442490	0.5142	2.88	158.343
GLU_64@O	TYR_72@H	TYR_72@N	2440551	0.5138	2.8663	160.514
TRP_221@O	GLU_225@H	GLU_225@N	2423472	0.5102	2.8764	153.167
GLU_36@O	ALA_40@H	ALA_40@N	2384283	0.502	2.8806	160.274
HD2_460@O	LEU_464@H	LEU_464@N	2371826	0.4993	2.8913	162.232
ILE_182@O	SER_186@H	SER_186@N	2362981	0.4975	2.8674	158.025
TRP_480@O	GLU_484@H	GLU_484@N	2354766	0.4957	2.8815	154.667
VAL_227@O	LEU_231@H	LEU_231@N	2354683	0.4957	2.8792	158.706
MET_180@O	LEU_184@H	LEU_184@N	2350971	0.4949	2.8787	161.762
GLN_222@O	ASN_226@H	ASN_226@N	2345152	0.4937	2.8735	157.017
MET_422@O	LEU_426@H	LEU_426@N	2341255	0.4929	2.8802	157.007
ARG_194@O	LEU_198@H	LEU_198@N	2328387	0.4902	2.8731	159.645
TYR_452@O	TRP_456@H	TRP_456@N	2307457	0.4858	2.8774	162.523
PRO_438@O	GLN_442@H	GLN_442@N	2305998	0.4855	2.8701	159.005
GLU_166@O	GLN_170@H	GLN_170@N	2304894	0.4852	2.8566	158.794
MET_163@O	LEU_167@H	LEU_167@N	2302065	0.4846	2.8776	156.167
ASP_279@O	LYS_283@H	LYS_283@N	2283064	0.4806	2.8755	159.26
ALA_466@O	ASP_471@H	ASP_471@N	2262996	0.4764	2.8797	159.496
GLU_365@OE2	ARG_361@HH21	ARG_361@NH2	2260256	0.4758	2.8112	160.719
ALA_16@O	ASP_20@H	ASP_20@N	2250834	0.4739	2.878	158.841
VAL_49@O	ALA_53@H	ALA_53@N	2248796	0.4734	2.8843	157.37
GLU_365@OE1	ARG_361@HE	ARG_361@NE	2224137	0.4682	2.7914	162.727
GLU_365@OE2	HD1_411@HD1	HD1_411@ND1	2222794	0.468	2.7601	155.952
GLN_150@O	ALA_154@H	ALA_154@N	2221803	0.4677	2.8699	154.617
GLU_365@OE1	HD1_411@HD1	HD1_411@ND1	2221689	0.4677	2.7636	156.393
LEU_105@O	ILE_109@H	ILE_109@N	2221620	0.4677	2.8911	155.184
GLU_365@OE2	ARG_361@HE	ARG_361@NE	2202924	0.4638	2.7912	162.604
GLU_365@OE1	ARG_361@HH21	ARG_361@NH2	2202199	0.4636	2.8119	160.817
VAL_273@O	ILE_277@H	ILE_277@N	2171386	0.4571	2.8846	157.53
GLU_38@O	MET_42@H	MET_42@N	2168663	0.4566	2.8757	158.536
ALA_275@O	ASP_279@H	ASP_279@N	2163079	0.4554	2.8774	158.882
LEU_321@O	LEU_333@H	LEU_333@N	2156430	0.454	2.8719	159.551
ASP_121@OD2	THR_118@H	THR_118@N	2139074	0.4503	2.8476	159.13
LEU_483@O	LYS_487@H	LYS_487@N	2134818	0.4494	2.8851	160.698
ARG_214@O	LEU_218@H	LEU_218@N	2127733	0.4479	2.8883	163.257
ASN_226@O	ARG_230@H	ARG_230@N	2112254	0.4447	2.8839	158.237
ARG_489@O	PHE_493@H	PHE_493@N	2107470	0.4437	2.8713	160.284
ARG_453@O	LEU_457@H	LEU_457@N	2103031	0.4427	2.8746	156.626
VAL_308@O	ALA_312@H	ALA_312@N	2096139	0.4413	2.8854	157.653
ILE_298@O	LEU_302@H	LEU_302@N	2090980	0.4402	2.8888	159.863
ILE_39@O	LEU_43@H	LEU_43@N	2087235	0.4394	2.8898	160.063
ILE_314@O	ILE_318@H	ILE_318@N	2087101	0.4394	2.8884	160.982
LEU_224@O	LYS_228@H	LYS_228@N	2086867	0.4393	2.8849	159.293
HD2_201@O	LEU_205@H	LEU_205@N	2085996	0.4392	2.8966	162.304
ALA_219@O	HD3_223@H	HD3_223@N	2081264	0.4382	2.8806	154.443
ILE_277@O	ILE_281@H	ILE_281@N	2079567	0.4378	2.8853	157.095
ALA_472@O	LYS_476@H	LYS_476@N	2066543	0.4351	2.893	161.628
ARG_278@O	ILE_282@H	ILE_282@N	2066325	0.435	2.8831	158.788
ALA_312@O	LEU_316@H	LEU_316@N	2064882	0.4347	2.8801	159.374
GLN_488@O	GLU_492@H	GLU_492@N	2055845	0.4328	2.8804	158.868
ARG_310@O	ILE_314@H	ILE_314@N	2053338	0.4323	2.8843	157.905
ALA_213@O	LYS_217@H	LYS_217@N	2044101	0.4303	2.8945	161.619
ARG_385@O	GLN_389@H	GLN_389@N	2043779	0.4303	2.8699	156.916
ASP_380@OD2	THR_377@H	THR_377@N	2030973	0.4276	2.8458	158.977
ASN_161@OD1	LEU_164@H	LEU_164@N	2029595	0.4273	2.8686	154.562
GLU_297@O	MET_301@H	MET_301@N	2026395	0.4266	2.8775	157.835
LEU_313@O	GLU_317@H	GLU_317@N	2023736	0.426	2.8691	151.471
GLU_404@O	MET_408@H	MET_408@N	1992237	0.4194	2.8755	161.635
ARG_473@O	LEU_477@H	LEU_477@N	1977626	0.4163	2.8909	163.352
LEU_364@O	ILE_368@H	ILE_368@N	1961631	0.413	2.8964	154.519
ASP_20@O	LYS_24@H	LYS_24@N	1957671	0.4121	2.8783	159.772
ARG_126@O	GLN_130@H	GLN_130@N	1949892	0.4105	2.8778	156.671
ILE_18@O	ILE_22@H	ILE_22@N	1944588	0.4094	2.8858	156.743
ASP_239@O	ASP_243@H	ASP_243@N	1934655	0.4073	2.8846	161.743
GLU_425@OE2	ARG_428@HH21	ARG_428@NH2	1933160	0.407	2.7927	159.377
ARG_378@O	VAL_382@H	VAL_382@N	1932267	0.4068	2.882	159.431
ALA_478@O	HD3_482@H	HD3_482@N	1926754	0.4056	2.8804	152.778
LEU_426@O	SER_430@HG	SER_430@OG	1922875	0.4048	2.8092	162.976
ASN_420@OD1	LEU_423@H	LEU_423@N	1918300	0.4039	2.8711	154.396
MET_439@O	LEU_443@H	LEU_443@N	1915021	0.4032	2.8842	160.774
ALA_101@O	LEU_105@H	LEU_105@N	1912687	0.4027	2.8934	163.361
PHE_427@O	TRP_431@H	TRP_431@N	1893078	0.3985	2.879	156.863
GLN_429@O	TRP_433@H	TRP_433@N	1892071	0.3983	2.8837	160.39
GLU_31@O	VAL_73@H	VAL_73@N	1888846	0.3977	2.871	162.064
GLU_145@O	MET_149@H	MET_149@N	1884529	0.3967	2.8707	163.643
PHE_168@O	TRP_172@H	TRP_172@N	1883908	0.3966	2.8715	157.331
ASN_485@O	ARG_489@H	ARG_489@N	1869318	0.3935	2.8835	159.758
LEU_62@O	LEU_74@H	LEU_74@N	1868271	0.3933	2.87	160.189
LEU_388@O	GLU_392@H	GLU_392@N	1862928	0.3922	2.8786	160.622
ILE_240@O	GLY_244@H	GLY_244@N	1861752	0.3919	2.8659	151.316
ILE_55@O	ILE_59@H	ILE_59@N	1854274	0.3904	2.8922	160.602
ARG_119@O	VAL_123@H	VAL_123@N	1851022	0.3897	2.8831	159.308
GLU_391@O	LEU_395@H	LEU_395@N	1850508	0.3896	2.8734	159.024
TRP_174@O	ASN_178@HD22	ASN_178@ND2	1831919	0.3857	2.8397	159.216
MET_315@O	LYS_319@H	LYS_319@N	1827673	0.3848	2.8817	158.755
GLU_166@OE1	ARG_169@HH21	ARG_169@NH2	1824612	0.3841	2.7866	160.574
GLU_106@OE2	HD1_152@HD1	HD1_152@ND1	1817415	0.3826	2.7622	158.234
ARG_51@O	ILE_55@H	ILE_55@N	1812400	0.3816	2.8882	158.413
GLN_173@O	ASN_177@H	ASN_177@N	1812374	0.3816	2.8725	155.629
LEU_54@O	GLU_58@H	GLU_58@N	1809973	0.381	2.8773	151.396
LYS_487@O	LEU_491@H	LEU_491@N	1807448	0.3805	2.8861	158.069
GLU_106@OE2	ARG_102@HH21	ARG_102@NH2	1804235	0.3798	2.8187	158.663
GLU_97@OE1	SER_421@H	SER_421@N	1795740	0.3781	2.8222	161.146
TRP_197@O	HD2_201@H	HD2_201@N	1791634	0.3772	2.8879	162.694
VAL_486@O	LEU_490@H	LEU_490@N	1790863	0.377	2.8853	158.689
GLU_106@OE1	ARG_102@HE	ARG_102@NE	1789933	0.3768	2.7875	161.796
GLN_229@O	GLU_233@H	GLU_233@N	1788462	0.3765	2.8864	157.546
GLU_225@OE1	GLN_103@HE21	GLN_103@NE2	1772339	0.3731	2.8279	164.746
GLU_484@OE1	GLN_362@HE21	GLN_362@NE2	1757525	0.37	2.8321	164.653
ALA_360@O	LEU_364@H	LEU_364@N	1754785	0.3694	2.8967	163.708
GLU_225@OE2	GLN_103@HE21	GLN_103@NE2	1754034	0.3693	2.8283	164.715
PRO_294@O	GLU_297@H	GLU_297@N	1745017	0.3674	2.8665	147.144
ALA_206@O	LYS_210@H	LYS_210@N	1741839	0.3667	2.8897	159.413
PRO_35@O	GLU_38@H	GLU_38@N	1739723	0.3663	2.865	146.823
GLU_425@OE1	ARG_428@HH21	ARG_428@NH2	1733808	0.365	2.795	159.186
GLN_409@O	ALA_413@H	ALA_413@N	1730811	0.3644	2.8838	154.484
ALA_465@O	LYS_469@H	LYS_469@N	1730307	0.3643	2.8891	159.207
GLU_97@OE1	SER_421@HG	SER_421@OG	1723996	0.3629	2.6791	164.384
ARG_19@O	ILE_23@H	ILE_23@N	1708325	0.3596	2.8876	158.689
ILE_204@O	LEU_208@H	LEU_208@N	1700507	0.358	2.9018	159.021
GLU_132@O	LEU_136@H	LEU_136@N	1679266	0.3535	2.8823	157.181
LEU_423@O	PHE_427@H	PHE_427@N	1677537	0.3532	2.8962	157.648
ASP_380@OD1	THR_377@HG1	THR_377@OG1	1669886	0.3516	2.7011	162.708
PRO_354@O	LEU_358@H	LEU_358@N	1657543	0.349	2.8838	158.652
GLU_484@OE2	GLN_362@HE21	GLN_362@NE2	1655591	0.3485	2.8326	164.554
PRO_10@O	VAL_14@H	VAL_14@N	1647411	0.3468	2.8817	163.327
GLU_36@OE1	ARG_47@HE	ARG_47@NE	1645200	0.3464	2.8118	154.234
GLN_432@O	ASN_436@H	ASN_436@N	1630622	0.3433	2.8686	156.289
GLU_97@OE2	SER_421@H	SER_421@N	1609691	0.3389	2.8223	161.153
HIE_185@O	ASP_189@H	ASP_189@N	1592071	0.3352	2.8694	155.69
GLY_70@O	ARG_66@H	ARG_66@N	1591618	0.3351	2.8556	159.313
ASP_83@O	ALA_87@H	ALA_87@N	1587703	0.3343	2.872	158.019
GLU_36@OE2	ARG_47@HE	ARG_47@NE	1583744	0.3334	2.8118	154.193
LEU_129@O	GLU_133@H	GLU_133@N	1570938	0.3307	2.8904	160.324
GLY_458@O	GLN_462@H	GLN_462@N	1570341	0.3306	2.8935	155.676
LEU_231@O	SER_235@H	SER_235@N	1567463	0.33	2.89	155.071
GLN_170@O	TRP_174@H	TRP_174@N	1565060	0.3295	2.88	160.387
GLU_295@OE2	ARG_306@HE	ARG_306@NE	1562616	0.329	2.8115	154.201
GLU_166@OE2	ARG_169@HE	ARG_169@NE	1562348	0.3289	2.8408	159.348
ASP_459@OD2	HD3_482@HD1	HD3_482@ND1	1558906	0.3282	2.8418	159.275
GLU_392@O	ALA_396@H	ALA_396@N	1551594	0.3267	2.8743	157.896
GLU_356@O	ALA_360@H	ALA_360@N	1543914	0.325	2.8955	156.215
MET_125@O	LEU_129@H	LEU_129@N	1543403	0.3249	2.8936	157.477
GLN_12@O	ALA_16@H	ALA_16@N	1541378	0.3245	2.883	155.19
LEU_164@O	PHE_168@H	PHE_168@N	1538350	0.3239	2.895	157.199
GLU_97@OE2	SER_421@HG	SER_421@OG	1537420	0.3237	2.6785	164.39
GLU_295@OE1	ARG_306@HE	ARG_306@NE	1535102	0.3232	2.8114	154.168
PRO_95@O	LEU_99@H	LEU_99@N	1533663	0.3229	2.8898	159.232
GLU_36@OE1	ARG_47@HH21	ARG_47@NH2	1533623	0.3229	2.8063	151.871
TRP_172@O	GLU_176@H	GLU_176@N	1529493	0.322	2.8867	160.557
SER_405@O	GLN_409@H	GLN_409@N	1526804	0.3214	2.8818	162.764
TRP_456@O	HD2_460@H	HD2_460@N	1522967	0.3206	2.9031	162.354
HD3_482@O	VAL_486@H	VAL_486@N	1516450	0.3193	2.902	159.315
GLU_36@OE2	ARG_47@HH21	ARG_47@NH2	1508958	0.3177	2.8064	152.041
GLY_94@O	LEU_98@H	LEU_98@N	1505784	0.317	2.8937	159.328
GLU_13@O	MET_17@H	MET_17@N	1505722	0.317	2.885	156.935
ILE_441@O	SER_445@H	SER_445@N	1497069	0.3152	2.8613	153.021
GLN_127@O	LEU_131@H	LEU_131@N	1496049	0.315	2.8846	155.588
LEU_167@O	SER_171@HG	SER_171@OG	1495331	0.3148	2.8128	162.89
LEU_490@O	SER_494@H	SER_494@N	1494449	0.3146	2.8811	154.279
GLY_199@O	GLN_203@H	GLN_203@N	1493412	0.3144	2.8923	155.167
PRO_179@O	GLN_183@H	GLN_183@N	1493300	0.3144	2.8789	160.342
SER_403@O	AP1_407@H	AP1_407@N	1492555	0.3142	2.8619	159.854
GLU_317@O	GLY_320@H	GLY_320@N	1492555	0.3142	2.8825	147.9
ASP_238@O	TYR_241@H	TYR_241@N	1491139	0.3139	2.8863	149.761
LYS_124@O	ALA_128@H	ALA_128@N	1488381	0.3133	2.886	156.98
GLU_297@OE2	ARG_296@HH21	ARG_296@NH2	1483941	0.3124	2.8069	156.173
LYS_383@O	ALA_387@H	ALA_387@N	1481699	0.3119	2.884	158.019
LYS_228@O	LEU_232@H	LEU_232@N	1476977	0.3109	2.8954	157.971
GLU_290@O	VAL_332@H	VAL_332@N	1472180	0.3099	2.876	162.119
GLU_455@O	ASP_459@H	ASP_459@N	1470632	0.3096	2.8833	152.616
GLU_145@OE2	ML1_259@H6	ML1_259@O2	1464446	0.3083	2.7406	159.724
ASP_121@OD1	THR_118@HG1	THR_118@OG1	1461858	0.3078	2.7011	162.793
GLU_295@OE1	ARG_306@HH21	ARG_306@NH2	1460170	0.3074	2.805	152.141
THR_377@O	ILE_381@H	ILE_381@N	1459636	0.3073	2.904	160.575
GLU_145@OE1	ML1_259@H6	ML1_259@O2	1457469	0.3068	2.7395	159.639
PRO_35@O	ILE_39@H	ILE_39@N	1457224	0.3068	2.8953	159.47
GLU_295@OE2	ARG_306@HH21	ARG_306@NH2	1455572	0.3064	2.8054	151.983
TRP_440@O	HIE_444@H	HIE_444@N	1441050	0.3034	2.8824	160.794
TYR_193@O	GLU_196@H	GLU_196@N	1438257	0.3028	2.8659	150.908
THR_118@O	ILE_122@H	ILE_122@N	1437456	0.3026	2.9046	160.544
GLU_297@OE1	ARG_296@HH21	ARG_296@NH2	1436371	0.3024	2.808	155.881
TRP_431@O	GLU_435@H	GLU_435@N	1428333	0.3007	2.8871	161.115
LEU_131@O	GLU_135@H	GLU_135@N	1422718	0.2995	2.8828	158.939
TYR_193@O	TRP_197@H	TRP_197@N	1422357	0.2994	2.881	161.268
ARG_393@O	SER_397@HG	SER_397@OG	1421082	0.2992	2.7465	162.018
GLU_425@OE2	ARG_428@HE	ARG_428@NE	1420519	0.2991	2.8314	159.239
ILE_463@O	LEU_467@H	LEU_467@N	1419818	0.2989	2.908	158.724
TRP_221@O	GLN_103@HE22	GLN_103@NE2	1407919	0.2964	2.8895	160.555
GLU_97@O	ALA_101@H	ALA_101@N	1401186	0.295	2.9002	155.971
GLU_120@O	LYS_124@H	LYS_124@N	1398876	0.2945	2.8903	157.648
GLU_356@OE2	SER_162@H	SER_162@N	1397316	0.2942	2.8285	161.062
GLU_356@OE1	SER_162@H	SER_162@N	1391424	0.2929	2.8282	160.967
SER_366@O	GLU_370@H	GLU_370@N	1389553	0.2925	2.9049	156.822
TRP_181@O	HIE_185@H	HIE_185@N	1387278	0.2921	2.8855	159.534
GLU_38@OE2	ARG_37@HH21	ARG_37@NH2	1383553	0.2913	2.8074	156.109
TRP_433@O	ASN_437@HD22	ASN_437@ND2	1379456	0.2904	2.8405	156.852
GLU_311@O	MET_315@H	MET_315@N	1373962	0.2893	2.8963	157.397
ASP_498@O	ASP_502@H	ASP_502@N	1369757	0.2884	2.8789	160.778
GLU_356@OE2	SER_162@HG	SER_162@OG	1368605	0.2881	2.6795	164.608
GLU_425@OE1	ARG_428@HE	ARG_428@NE	1366136	0.2876	2.8361	159.599
GLN_271@O	ALA_275@H	ALA_275@N	1365118	0.2874	2.8805	154.308
GLU_379@O	LYS_383@H	LYS_383@N	1357108	0.2857	2.8914	157.736
TYR_500@O	TYR_504@H	TYR_504@N	1348879	0.284	2.8696	158.328
ALA_128@O	GLU_132@H	GLU_132@N	1347658	0.2837	2.8911	158.54
GLU_404@OE2	ML1_518@H6	ML1_518@O2	1337191	0.2815	2.7202	162.072
PRO_294@O	ILE_298@H	ILE_298@N	1331832	0.2804	2.8954	159.673
SER_450@O	LYS_454@H	LYS_454@N	1330598	0.2801	2.8819	159.09
GLU_38@OE1	ARG_37@HH21	ARG_37@NH2	1327097	0.2794	2.8087	155.733
MET_17@O	LEU_21@H	LEU_21@N	1326418	0.2792	2.8888	156.347
GLU_356@OE1	SER_162@HG	SER_162@OG	1325694	0.2791	2.6794	164.756
ASP_380@OD1	THR_377@H	THR_377@N	1324891	0.2789	2.8451	159.007
GLN_386@O	LEU_390@H	LEU_390@N	1319663	0.2778	2.8906	158.226
SER_107@O	GLU_111@H	GLU_111@N	1308761	0.2755	2.9063	156.935
ASP_200@OD2	HD3_223@HD1	HD3_223@ND1	1306553	0.2751	2.8336	157.919
GLU_297@OE1	ARG_296@HE	ARG_296@NE	1303860	0.2745	2.8166	159.029
SER_191@O	LYS_195@H	LYS_195@N	1294285	0.2725	2.8757	157.218
LEU_280@O	THR_284@H	THR_284@N	1289628	0.2715	2.8718	152.721
ASP_243@O	LEU_246@H	LEU_246@N	1288684	0.2713	2.8916	147.9
ASP_189@OD1	ARG_194@HH21	ARG_194@NH2	1287601	0.2711	2.7813	157.293
THR_307@O	GLU_311@H	GLU_311@N	1279557	0.2694	2.8945	161.151
GLU_58@O	GLY_61@H	GLY_61@N	1279096	0.2693	2.8882	147.641
GLU_52@O	MET_56@H	MET_56@N	1272397	0.2679	2.8978	157.683
GLN_203@O	ALA_207@H	ALA_207@N	1270304	0.2674	2.8983	158.397
GLU_166@OE2	ARG_169@HH21	ARG_169@NH2	1264036	0.2661	2.7895	159.413
LEU_390@O	GLU_394@H	GLU_394@N	1263069	0.2659	2.875	158.489
GLY_147@O	PHE_151@H	PHE_151@N	1259474	0.2652	2.8746	154.767
TRP_480@O	GLN_362@HE22	GLN_362@NE2	1256686	0.2646	2.8889	159.749
GLU_404@OE1	ML1_518@H6	ML1_518@O2	1256420	0.2645	2.7305	161.428
ASP_497@O	TYR_500@H	TYR_500@N	1256170	0.2645	2.8873	152.676
GLU_36@OE2	ARG_51@HH21	ARG_51@NH2	1228974	0.2587	2.7943	156.457
ASP_459@OD1	HD3_482@HD1	HD3_482@ND1	1227357	0.2584	2.8433	159.232
GLN_271@OE1	GLN_271@H	GLN_271@N	1226650	0.2582	2.8375	149.799
GLU_297@OE2	ARG_296@HE	ARG_296@NE	1225790	0.2581	2.8171	158.931
ASP_200@OD1	HD3_223@HD1	HD3_223@ND1	1225356	0.258	2.8318	157.871
GLU_36@OE1	ARG_51@HH21	ARG_51@NH2	1225134	0.2579	2.7946	156.4
GLU_133@O	ALA_137@H	ALA_137@N	1223309	0.2575	2.8777	156.423
GLU_272@O	MET_276@H	MET_276@N	1222893	0.2575	2.891	155.884
GLU_394@O	ALA_399@H	ALA_399@N	1221360	0.2571	2.8831	160.331
SER_338@O	ASP_342@H	ASP_342@N	1217729	0.2564	2.8624	158.528
GLU_425@OE1	SER_84@HG	SER_84@OG	1210763	0.2549	2.6697	164.416
GLY_353@O	LEU_357@H	LEU_357@N	1204744	0.2536	2.8941	158.728
GLU_391@OE2	ARG_453@HH21	ARG_453@NH2	1204146	0.2535	2.7913	159.684
GLU_38@OE1	ARG_37@HE	ARG_37@NE	1200659	0.2528	2.817	158.938
THR_48@O	GLU_52@H	GLU_52@N	1199140	0.2525	2.8963	160.736
LEU_232@O	SER_235@HG	SER_235@OG	1197786	0.2522	2.7046	161.771
LEU_246@O	SER_249@H	SER_249@N	1188953	0.2503	2.8879	152.582
GLU_323@OE2	ARG_325@HE	ARG_325@NE	1185020	0.2495	2.8303	155.361
GLU_323@OE1	ARG_325@HE	ARG_325@NE	1177880	0.248	2.8302	155.715
ALA_40@O	VAL_45@H	VAL_45@N	1163320	0.2449	2.9026	161.076
ASP_121@OD1	THR_118@H	THR_118@N	1156268	0.2434	2.847	159.248
LEU_21@O	THR_25@H	THR_25@N	1152417	0.2426	2.8723	153.325
GLY_329@O	ARG_325@H	ARG_325@N	1145542	0.2412	2.8634	158.524
ALA_475@O	MET_479@H	MET_479@N	1144026	0.2408	2.9114	159.257
ALA_113@O	GLN_116@H	GLN_116@N	1139443	0.2399	2.8881	151.635
ALA_216@O	MET_220@H	MET_220@N	1136586	0.2393	2.9112	159.314
GLU_166@OE1	ARG_169@HE	ARG_169@NE	1129586	0.2378	2.846	158.079
GLU_295@OE1	ARG_310@HE	ARG_310@NE	1127443	0.2374	2.8264	157.963
ASP_345@O	CYS_349@H	CYS_349@N	1125969	0.237	2.8734	158.037
GLU_323@OE2	ARG_325@HH21	ARG_325@NH2	1125908	0.237	2.8013	154.616
GLU_36@OE2	ARG_51@HE	ARG_51@NE	1121379	0.2361	2.8265	157.198
GLU_36@OE1	ARG_51@HE	ARG_51@NE	1118897	0.2356	2.8259	157.232
ASP_189@OD2	ARG_194@HH21	ARG_194@NH2	1118829	0.2355	2.7768	158.642
GLU_323@OE1	ARG_325@HH21	ARG_325@NH2	1115670	0.2349	2.8014	154.418
GLN_130@O	ARG_134@H	ARG_134@N	1110226	0.2337	2.8856	153.077
GLU_38@OE2	ARG_37@HE	ARG_37@NE	1104063	0.2324	2.8173	158.856
MET_276@O	LEU_280@H	LEU_280@N	1100420	0.2317	2.8957	155.238
SER_146@O	GLN_150@H	GLN_150@N	1100158	0.2316	2.8871	159.906
GLU_295@OE2	ARG_310@HE	ARG_310@NE	1095160	0.2306	2.8267	157.959
HD3_223@O	VAL_227@H	VAL_227@N	1089977	0.2295	2.909	158.46
ASN_437@O	TRP_440@H	TRP_440@N	1069636	0.2252	2.8858	152.435
MET_384@O	LEU_388@H	LEU_388@N	1068850	0.225	2.8944	156.675
GLU_64@OE1	ARG_66@HH21	ARG_66@NH2	1065656	0.2243	2.8017	154.727
GLU_64@OE2	ARG_66@HH21	ARG_66@NH2	1053897	0.2219	2.8017	154.782
GLU_391@OE2	ARG_453@HE	ARG_453@NE	1052159	0.2215	2.8074	160.102
GLU_391@OE1	ARG_453@HH21	ARG_453@NH2	1049904	0.221	2.7922	160.247
LEU_246@O	TRP_250@H	TRP_250@N	1047496	0.2205	2.8454	160.821
GLN_359@OE1	ASN_161@HD22	ASN_161@ND2	1047172	0.2205	2.8526	162.673
LEU_443@O	LEU_447@H	LEU_447@N	1043132	0.2196	2.8733	159.402
ASP_459@OD2	ASN_485@HD22	ASN_485@ND2	1040308	0.219	2.8374	160.165
ASN_485@OD1	ARG_489@HH11	ARG_489@NH1	1039034	0.2187	2.8252	155.215
GLU_391@OE1	SER_403@HG	SER_403@OG	1034536	0.2178	2.6908	164.226
GLU_391@OE1	ARG_453@HE	ARG_453@NE	1030092	0.2169	2.8079	160.856
GLU_492@OE2	ARG_489@HH21	ARG_489@NH2	1028114	0.2164	2.8106	155.201
PHE_242@O	PHE_247@H	PHE_247@N	1027398	0.2163	2.8842	151.016
ARG_434@O	ASN_437@H	ASN_437@N	1027348	0.2163	2.8868	152.639
PHE_493@O	VAL_496@H	VAL_496@N	1014356	0.2135	2.8904	155.821
GLU_492@OE1	ARG_489@HH21	ARG_489@NH2	1013527	0.2134	2.8108	155.218
GLY_406@O	PHE_410@H	PHE_410@N	1011515	0.213	2.8897	154.914
GLU_64@OE1	ARG_66@HE	ARG_66@NE	1007754	0.2122	2.8295	155.697
GLN_442@O	HIE_446@H	HIE_446@N	1005097	0.2116	2.8761	154.296
GLU_196@O	ASP_200@H	ASP_200@N	1004971	0.2116	2.8872	153.649
SER_144@O	AP1_148@H	AP1_148@N	999084	0.2103	2.8785	159.568
GLU_391@OE2	SER_403@HG	SER_403@OG	990198	0.2085	2.6869	164.007
GLN_339@O	SER_343@H	SER_343@N	988620	0.2081	2.8728	156.566
GLU_295@OE2	ARG_310@HH21	ARG_310@NH2	988133	0.208	2.7941	157.145
GLU_295@OE1	ARG_310@HH21	ARG_310@NH2	983492	0.2071	2.7945	157.064
GLU_64@OE2	ARG_66@HE	ARG_66@NE	982138	0.2068	2.8291	155.713
ALA_299@O	VAL_304@H	VAL_304@N	980614	0.2064	2.9046	160.96
ASN_108@O	PHE_112@H	PHE_112@N	978408	0.206	2.9063	157.474
ARG_37@O	GLU_41@H	GLU_41@N	971201	0.2045	2.8956	155.963
VAL_73@O	GLY_30@H	GLY_30@N	967583	0.2037	2.8531	155.007
HD1_411@O	ALA_415@H	ALA_415@N	965428	0.2032	2.9096	158.825
GLU_166@OE2	SER_343@HG	SER_343@OG	959206	0.2019	2.6673	163.587
LEU_467@O	LYS_470@H	LYS_470@N	958732	0.2018	2.8971	146.66
GLU_300@OE2	ARG_296@HH22	ARG_296@NH2	957167	0.2015	2.808	156.731
GLU_404@OE2	ARG_434@HH21	ARG_434@NH2	956565	0.2014	2.7945	154.082
ARG_134@O	SER_138@HG	SER_138@OG	956390	0.2013	2.7514	161.923
GLN_462@O	ALA_466@H	ALA_466@N	953866	0.2008	2.9045	157.7
GLU_300@OE1	ARG_296@HH22	ARG_296@NH2	947933	0.1996	2.8084	156.732
ALA_369@O	ALA_373@H	ALA_373@N	947358	0.1994	2.906	155.943
ARG_296@O	GLU_300@H	GLU_300@N	945866	0.1991	2.8967	156.002
LEU_208@O	LYS_211@H	LYS_211@N	942380	0.1984	2.8987	146.662
ASN_28@O	GLU_31@H	GLU_31@N	940668	0.198	2.898	156.039
ALA_372@O	GLN_375@H	GLN_375@N	926443	0.195	2.8849	150.505
GLN_389@O	ARG_393@H	ARG_393@N	918054	0.1933	2.8885	154.431
LYS_454@O	GLY_458@H	GLY_458@N	912651	0.1921	2.8952	152.614
GLU_404@OE1	ARG_434@HH21	ARG_434@NH2	912198	0.192	2.7997	153.664
ASP_342@O	ALA_346@H	ALA_346@N	905594	0.1907	2.8738	157.223
SER_162@O	GLU_166@H	GLU_166@N	904708	0.1905	2.8912	155.908
SER_402@O	GLY_406@H	GLY_406@N	904229	0.1904	2.8826	156.692
ILE_499@O	GLY_503@H	GLY_503@N	904062	0.1903	2.8701	150.893
GLU_41@OE1	ARG_37@HH22	ARG_37@NH2	898405	0.1891	2.8079	156.644
GLY_337@O	THR_341@HG1	THR_341@OG1	894683	0.1884	2.7554	161.33
GLU_41@OE2	ARG_37@HH22	ARG_37@NH2	890393	0.1875	2.8076	156.516
HIE_444@O	ASP_448@H	ASP_448@N	890021	0.1874	2.8764	156.805
VAL_332@O	GLY_289@H	GLY_289@N	887066	0.1868	2.8545	158.647
SER_79@O	ASP_83@H	ASP_83@N	883686	0.186	2.8674	157.872
ASP_459@OD1	ASN_485@HD22	ASN_485@ND2	872623	0.1837	2.8407	159.877
ASN_287@O	GLU_290@H	GLU_290@N	872299	0.1836	2.8979	155.786
GLN_170@OE1	GLN_429@HE22	GLN_429@NE2	869020	0.183	2.837	159.466
GLN_100@OE1	ASN_420@HD22	ASN_420@ND2	861806	0.1814	2.8464	162.196
ALA_110@O	ALA_114@H	ALA_114@N	860744	0.1812	2.9054	155.731
GLU_132@OE2	HD2_201@HD1	HD2_201@ND1	854914	0.18	2.7837	152.842
GLN_80@O	SER_84@H	SER_84@N	854393	0.1799	2.8724	153.818
GLU_425@OE2	SER_84@HG	SER_84@OG	853399	0.1797	2.6747	163.907
ASN_367@O	PHE_371@H	PHE_371@N	853246	0.1796	2.9085	157.175
ALA_387@O	GLU_391@H	GLU_391@N	851434	0.1792	2.8941	156.49
LEU_395@O	SER_398@H	SER_398@N	850023	0.179	2.8918	150.224
GLU_404@OE2	ML1_518@H8	ML1_518@O5	845187	0.1779	2.7452	161.313
THR_25@O	TYR_27@H	TYR_27@N	844754	0.1778	2.8205	145.083
GLU_135@O	ALA_140@H	ALA_140@N	843495	0.1776	2.8895	161.056
GLU_135@OE2	ARG_134@HH21	ARG_134@NH2	842202	0.1773	2.7963	154.276
LEU_232@O	ASN_236@HD22	ASN_236@ND2	841983	0.1773	2.8363	159.979
PHE_151@O	ILE_155@H	ILE_155@N	841086	0.1771	2.9114	155.801
GLU_145@OE1	ARG_175@HH12	ARG_175@NH1	837435	0.1763	2.8011	156.816
ALA_156@O	THR_159@H	THR_159@N	837156	0.1762	2.9133	154.769
GLU_145@OE1	ARG_175@HH22	ARG_175@NH2	832802	0.1753	2.7968	157.136
LEU_426@O	SER_430@H	SER_430@N	829737	0.1747	2.9116	158.455
ASN_347@O	ALA_352@H	ALA_352@N	824849	0.1737	2.8849	157.774
GLU_41@OE2	ARG_37@HH12	ARG_37@NH1	824437	0.1736	2.8092	157.249
PRO_269@O	VAL_273@H	VAL_273@N	824352	0.1735	2.8947	163.563
ASP_189@OD2	SER_144@HG	SER_144@OG	822264	0.1731	2.6775	164.247
GLU_132@OE1	ARG_194@HH21	ARG_194@NH2	820573	0.1728	2.7812	160.565
ARG_393@O	SER_397@H	SER_397@N	813636	0.1713	2.883	154.421
ARG_134@O	SER_138@H	SER_138@N	812766	0.1711	2.8819	154.695
GLU_404@OE1	ML1_518@H8	ML1_518@O5	807453	0.17	2.7432	160.882
LEU_167@O	SER_171@H	SER_171@N	807372	0.17	2.9034	156.02
ASP_279@OD1	ARG_278@HH21	ARG_278@NH2	806403	0.1698	2.7655	153.218
AP1_407@OD1	ARG_434@HH22	ARG_434@NH2	805887	0.1697	2.8133	150.679
LEU_136@O	SER_139@H	SER_139@N	803473	0.1692	2.889	149.356
LEU_333@O	SER_336@HG	SER_336@OG	803424	0.1691	2.7286	161.343
GLU_41@OE1	ARG_37@HH12	ARG_37@NH1	799809	0.1684	2.8094	157.202
MET_220@O	LEU_224@H	LEU_224@N	799275	0.1683	2.9239	164.065
LEU_184@O	LEU_188@H	LEU_188@N	797103	0.1678	2.8836	159.532
GLN_183@O	HIE_187@H	HIE_187@N	792904	0.1669	2.8805	153.69
GLU_300@OE2	ARG_296@HH12	ARG_296@NH1	788280	0.166	2.8092	157.453
GLU_145@OE2	ARG_194@HH22	ARG_194@NH2	787309	0.1657	2.782	156.716
GLU_492@OE2	ARG_489@HE	ARG_489@NE	785738	0.1654	2.8235	156.678
SER_84@O	ASN_88@H	ASN_88@N	782716	0.1648	2.8886	154.571
HIE_185@O	LEU_188@H	LEU_188@N	779872	0.1642	2.8892	150.372
GLU_135@OE1	ARG_134@HH21	ARG_134@NH2	777960	0.1638	2.7982	153.837
GLU_166@O	GLN_170@HE22	GLN_170@NE2	777852	0.1638	2.8303	163.197
GLN_103@OE1	LYS_228@HZ1	LYS_228@NZ	775295	0.1632	2.7954	152.284
ASP_238@O	PHE_242@H	PHE_242@N	775135	0.1632	2.8905	158.461
GLU_300@OE1	ARG_296@HH12	ARG_296@NH1	774231	0.163	2.8092	157.543
GLU_435@OE2	ARG_19@HH22	ARG_19@NH2	773955	0.1629	2.7898	156.831
ASN_178@OD1	MET_180@H	MET_180@N	773846	0.1629	2.8687	151.724
GLU_492@OE1	ARG_489@HE	ARG_489@NE	773303	0.1628	2.8235	156.777
GLU_132@OE1	HD2_201@HD1	HD2_201@ND1	770489	0.1622	2.7849	152.837
PHE_371@O	GLN_375@H	GLN_375@N	768408	0.1618	2.8884	161.176
GLN_103@OE1	LYS_228@HZ2	LYS_228@NZ	765698	0.1612	2.7952	152.287
ASP_189@OD1	ARG_194@HE	ARG_194@NE	763613	0.1608	2.8473	152.677
ASN_485@OD1	TRP_456@HE1	TRP_456@NE1	760454	0.1601	2.8431	152.558
GLN_103@OE1	LYS_228@HZ3	LYS_228@NZ	759544	0.1599	2.7954	152.273
ARG_175@O	ASN_178@H	ASN_178@N	756371	0.1592	2.8948	152.226
GLU_435@OE1	ARG_19@HH22	ARG_19@NH2	750180	0.1579	2.7919	156.858
LEU_491@O	SER_494@HG	SER_494@OG	747288	0.1573	2.7058	161.656
ASN_420@OD1	MET_422@H	MET_422@N	743985	0.1566	2.8654	144.877
GLU_379@OE1	ARG_378@HH21	ARG_378@NH2	738453	0.1555	2.8109	153.828
GLU_379@OE2	ARG_378@HH21	ARG_378@NH2	738071	0.1554	2.8111	153.842
LEU_491@O	ASN_495@HD22	ASN_495@ND2	736198	0.155	2.8445	159.747
ASP_238@OD2	ASP_239@H	ASP_239@N	733721	0.1545	2.8303	144.23
GLU_404@OE1	ARG_434@HE	ARG_434@NE	732821	0.1543	2.8422	154.078
TRP_431@O	ARG_434@H	ARG_434@N	731909	0.1541	2.8894	148.044
GLU_145@OE2	ARG_175@HH12	ARG_175@NH1	730416	0.1538	2.8019	157.587
LEU_246@O	SER_249@HG	SER_249@OG	729178	0.1535	2.7007	162.715
ALA_346@O	ASN_350@HD22	ASN_350@ND2	726763	0.153	2.8385	159.981
SER_143@O	SER_146@HG	SER_146@OG	722610	0.1521	2.7142	161.771
PHE_410@O	ILE_414@H	ILE_414@N	721882	0.152	2.9149	155.388
SER_430@O	ARG_434@H	ARG_434@N	718267	0.1512	2.8849	158.847
LEU_252@O	VAL_255@H	VAL_255@N	717497	0.1511	2.8844	157.772
GLY_337@O	THR_82@HG1	THR_82@OG1	716962	0.1509	2.7438	159.038
GLU_379@OE1	ARG_378@HE	ARG_378@NE	716775	0.1509	2.8296	155.441
GLU_379@OE2	ARG_378@HE	ARG_378@NE	715265	0.1506	2.8296	155.402
GLU_145@OE2	ARG_175@HH22	ARG_175@NH2	714045	0.1503	2.8006	157.653
GLY_78@O	THR_82@HG1	THR_82@OG1	712327	0.15	2.7591	161.596
GLU_132@OE2	ARG_194@HE	ARG_194@NE	708287	0.1491	2.8233	160.749
GLU_145@OE1	ARG_194@HH22	ARG_194@NH2	707385	0.1489	2.7777	157.821
GLU_394@OE1	ARG_393@HH21	ARG_393@NH2	705201	0.1485	2.8032	154.671
SER_421@OG	ASN_88@HD21	ASN_88@ND2	703311	0.1481	2.8909	162.665
ASN_437@OD1	ARG_19@HH21	ARG_19@NH2	703190	0.148	2.8271	156.384
ASN_178@OD1	ARG_278@HH11	ARG_278@NH1	702860	0.148	2.797	160.651
GLU_166@OE1	SER_343@HG	SER_343@OG	702703	0.1479	2.6741	163.336
SER_421@O	GLU_425@H	GLU_425@N	702027	0.1478	2.9008	155.335
ASP_238@OD1	ASP_239@H	ASP_239@N	699573	0.1473	2.83	144.212
THR_377@O	ASP_380@H	ASP_380@N	699510	0.1473	2.8828	144.951
GLN_432@O	ASN_436@HD22	ASN_436@ND2	699432	0.1472	2.8325	161.304
PHE_112@O	GLN_116@HE22	GLN_116@NE2	697928	0.1469	2.8275	157.733
GLU_120@OE1	ARG_119@HH21	ARG_119@NH2	696213	0.1466	2.8112	153.964
GLU_120@OE2	ARG_119@HH21	ARG_119@NH2	693876	0.1461	2.8113	153.966
ALA_415@O	THR_418@H	THR_418@N	692138	0.1457	2.9167	154.434
GLU_394@OE2	ARG_393@HH21	ARG_393@NH2	691439	0.1456	2.8037	154.848
ASP_189@OD1	SER_144@HG	SER_144@OG	688246	0.1449	2.6768	163.918
ASP_190@O	ARG_194@H	ARG_194@N	684275	0.1441	2.8858	162.825
ASN_76@O	SER_79@HG	SER_79@OG	681243	0.1434	2.7202	161.811
THR_118@O	ASP_121@H	ASP_121@N	681045	0.1434	2.8824	144.854
ARG_9@O	GLN_12@H	GLN_12@N	679063	0.143	2.878	150.754
GLN_12@OE1	GLN_12@H	GLN_12@N	677317	0.1426	2.8361	149.01
ASN_161@OD1	MET_163@H	MET_163@N	676244	0.1424	2.8658	144.797
MET_479@O	LEU_483@H	LEU_483@N	671490	0.1414	2.9276	164.421
TYR_452@O	GLU_455@H	GLU_455@N	670513	0.1412	2.8713	146.547
PHE_234@O	VAL_237@H	VAL_237@N	669156	0.1409	2.906	156.241
GLU_225@OE2	LYS_228@HZ2	LYS_228@NZ	668130	0.1407	2.7774	157.966
GLN_170@O	GLN_170@HE22	GLN_170@NE2	663754	0.1397	2.8627	150.399
THR_46@O	VAL_49@H	VAL_49@N	662204	0.1394	2.8974	148.034
GLU_58@OE2	VAL_65@H	VAL_65@N	661598	0.1393	2.8553	161.676
GLU_135@OE1	ARG_134@HE	ARG_134@NE	659882	0.1389	2.8297	153.538
GLU_225@OE2	LYS_228@HZ3	LYS_228@NZ	659781	0.1389	2.7772	158.002
THR_305@O	VAL_308@H	VAL_308@N	659380	0.1388	2.8943	147.239
GLU_225@OE1	LYS_228@HZ1	LYS_228@NZ	658941	0.1387	2.7775	157.961
GLU_225@OE1	LYS_228@HZ2	LYS_228@NZ	658361	0.1386	2.7772	157.914
SER_171@O	ARG_175@H	ARG_175@N	656731	0.1383	2.896	157.227
HD1_152@O	ALA_156@H	ALA_156@N	655529	0.138	2.9153	158.482
AP1_148@OD1	ARG_175@HH22	ARG_175@NH2	655206	0.1379	2.836	150.437
GLN_173@O	ASN_177@HD22	ASN_177@ND2	652342	0.1373	2.8319	159.079
ALA_140@O	SER_143@HG	SER_143@OG	650484	0.1369	2.7236	160.497
GLU_225@OE1	LYS_228@HZ3	LYS_228@NZ	648930	0.1366	2.7776	157.952
GLU_225@OE2	LYS_228@HZ1	LYS_228@NZ	648065	0.1364	2.7773	157.967
ASN_437@OD1	MET_439@H	MET_439@N	646968	0.1362	2.8807	153.648
GLU_135@OE2	ARG_134@HE	ARG_134@NE	646258	0.1361	2.8307	153.11
GLU_394@OE1	ARG_393@HE	ARG_393@NE	639405	0.1346	2.8247	155.334
SER_79@O	THR_82@H	THR_82@N	637188	0.1341	2.8871	154.058
SER_343@O	ASN_347@H	ASN_347@N	634633	0.1336	2.888	155.2
GLU_132@OE1	ARG_194@HH11	ARG_194@NH1	632600	0.1332	2.7825	162.681
ASP_190@O	TYR_193@H	TYR_193@N	632178	0.1331	2.8935	150.003
GLU_404@OE2	ARG_434@HE	ARG_434@NE	631595	0.133	2.8279	155.014
ASP_351@O	SER_162@H	SER_162@N	630749	0.1328	2.8465	158.222
GLU_317@OE1	VAL_324@H	VAL_324@N	627814	0.1322	2.8564	162.441
GLY_401@O	ALA_4@H	ALA_4@N	626269	0.1318	2.8461	155.821
ALA_93@O	TRP_174@HE1	TRP_174@NE1	625166	0.1316	2.8399	155.973
ASP_448@OD2	ARG_453@HE	ARG_453@NE	623902	0.1313	2.8229	157.922
GLU_484@OE1	LYS_487@HZ1	LYS_487@NZ	623229	0.1312	2.7786	156.772
GLU_484@OE1	LYS_487@HZ3	LYS_487@NZ	621501	0.1308	2.7784	156.778
ASP_189@OD2	ARG_194@HE	ARG_194@NE	618970	0.1303	2.8566	153.582
ML1_518@O3	HIE_444@HE2	HIE_444@NE2	617726	0.13	2.8803	152.02
GLU_394@OE2	ARG_393@HE	ARG_393@NE	617660	0.13	2.8246	155.49
GLU_317@OE2	VAL_324@H	VAL_324@N	614319	0.1293	2.8562	162.447
GLU_484@OE1	LYS_487@HZ2	LYS_487@NZ	613987	0.1293	2.7786	156.706
GLU_120@OE2	ARG_119@HE	ARG_119@NE	611696	0.1288	2.8293	155.617
GLU_120@OE1	ARG_119@HE	ARG_119@NE	611383	0.1287	2.8292	155.583
ARG_325@O	ALA_328@H	ALA_328@N	608438	0.1281	2.8868	153.976
GLU_58@OE1	VAL_65@H	VAL_65@N	608185	0.128	2.8569	161.867
GLU_391@OE2	ARG_453@HH22	ARG_453@NH2	603945	0.1271	2.7885	156.679
GLU_145@OE1	ML1_259@H8	ML1_259@O5	599530	0.1262	2.7355	161.384
GLU_484@OE2	LYS_487@HZ3	LYS_487@NZ	598361	0.126	2.7788	156.639
ASN_335@O	SER_338@HG	SER_338@OG	598315	0.126	2.7515	160.72
THR_82@O	ASN_340@H	ASN_340@N	597470	0.1258	2.8543	155.999
GLU_145@OE1	ARG_175@HH21	ARG_175@NH2	596796	0.1256	2.7961	156.024
GLU_484@OE2	LYS_487@HZ1	LYS_487@NZ	596264	0.1255	2.7786	156.599
SER_143@O	SER_146@H	SER_146@N	593976	0.125	2.8978	154.526
LYS_195@O	GLY_199@H	GLY_199@N	593703	0.125	2.8962	152.337
TRP_172@O	ARG_175@H	ARG_175@N	592716	0.1248	2.8773	146.521
ASP_86@O	CYS_90@H	CYS_90@N	588601	0.1239	2.8842	157.193
GLU_484@OE2	LYS_487@HZ2	LYS_487@NZ	588355	0.1239	2.7788	156.567
PRO_10@O	ARG_9@HH11	ARG_9@NH1	585936	0.1234	2.8367	157.641
GLN_362@OE1	LYS_487@HZ3	LYS_487@NZ	585841	0.1233	2.7977	152.318
HIE_446@O	SER_450@HG	SER_450@OG	584879	0.1231	2.7483	162.715
ALA_140@O	SER_144@H	SER_144@N	583610	0.1229	2.8812	156.115
GLU_145@OE2	ML1_259@H8	ML1_259@O5	582609	0.1227	2.738	161.5
GLN_362@OE1	LYS_487@HZ2	LYS_487@NZ	582238	0.1226	2.7977	152.348
ASP_497@O	PHE_501@H	PHE_501@N	580178	0.1221	2.8806	158.812
GLN_362@OE1	LYS_487@HZ1	LYS_487@NZ	580127	0.1221	2.7978	152.426
GLU_233@O	ASN_236@H	ASN_236@N	573501	0.1207	2.8963	149.14
GLU_132@OE2	ARG_194@HH21	ARG_194@NH2	571143	0.1202	2.7869	159.001
ALA_154@O	ALA_158@H	ALA_158@N	570885	0.1202	2.8799	145.433
AP1_407@OD1	ARG_434@HH12	ARG_434@NH1	570432	0.1201	2.8589	147.397
PRO_269@O	GLU_272@H	GLU_272@N	569827	0.12	2.881	146.697
PHE_501@O	PHE_506@H	PHE_506@N	569401	0.1199	2.8915	157.596
ASP_200@OD2	ASN_226@HD22	ASN_226@ND2	567776	0.1195	2.8456	158.762
GLU_135@OE1	SER_143@HG	SER_143@OG	566313	0.1192	2.67	163.405
ALA_328@O	ARG_291@HH11	ARG_291@NH1	566206	0.1192	2.8336	156.879
ASP_279@OD1	ARG_278@HE	ARG_278@NE	562646	0.1185	2.8354	149.823
GLU_290@OE2	ARG_291@H	ARG_291@N	558990	0.1177	2.8564	154.483
ALA_399@O	SER_402@HG	SER_402@OG	558843	0.1177	2.7302	158.117
ALA_413@O	ALA_417@H	ALA_417@N	558005	0.1175	2.8828	145.92
ASN_226@OD1	TRP_197@HE1	TRP_197@NE1	557292	0.1173	2.8487	155.116
ASN_226@OD1	ARG_230@HH11	ARG_230@NH1	556443	0.1171	2.8301	155.242
ASP_345@OD2	ARG_19@HH22	ARG_19@NH2	554857	0.1168	2.7811	160.838
PRO_344@O	VAL_348@H	VAL_348@N	554814	0.1168	2.8873	159.495
GLU_391@OE1	ARG_453@HH12	ARG_453@NH1	551641	0.1161	2.7886	157.395
GLU_391@OE2	ARG_453@HH12	ARG_453@NH1	548230	0.1154	2.7884	156.577
GLU_290@OE1	ARG_291@H	ARG_291@N	546251	0.115	2.8567	154.52
LEU_451@O	GLU_455@H	GLU_455@N	545233	0.1148	2.8899	158.525
ASP_502@O	LEU_505@H	LEU_505@N	544477	0.1146	2.8943	147.694
GLN_442@O	SER_445@HG	SER_445@OG	544071	0.1145	2.7176	162.142
PRO_344@O	ASN_347@H	ASN_347@N	543124	0.1143	2.8925	154.326
GLU_435@OE1	ARG_19@HH12	ARG_19@NH1	539676	0.1136	2.8124	155.398
THR_305@O	VAL_309@H	VAL_309@N	538803	0.1134	2.9159	161.644
SER_402@O	SER_405@HG	SER_405@OG	538751	0.1134	2.7186	161.901
LEU_252@O	ASP_256@H	ASP_256@N	536601	0.113	2.8704	161.722
GLU_233@OE2	ARG_230@HH21	ARG_230@NH2	535873	0.1128	2.8028	154.469
SER_143@O	GLY_147@H	GLY_147@N	532507	0.1121	2.8718	153.653
ASN_340@O	TRP_433@HE1	TRP_433@NE1	532400	0.1121	2.8535	159.786
HIE_160@O	ASP_351@H	ASP_351@N	530237	0.1116	2.8504	160.079
ALA_346@O	ASN_350@H	ASN_350@N	529257	0.1114	2.8801	154.778
GLU_404@OE1	ARG_434@HH22	ARG_434@NH2	528553	0.1113	2.7953	158.464
ASP_448@OD1	ARG_453@HH21	ARG_453@NH2	524449	0.1104	2.8208	159.742
GLN_429@O	GLN_429@HE22	GLN_429@NE2	522626	0.11	2.8725	151.397
ILE_318@O	SER_338@H	SER_338@N	522500	0.11	2.8507	157.415
GLY_142@O	SER_146@H	SER_146@N	522317	0.11	2.877	153.806
GLU_233@OE1	ARG_230@HH21	ARG_230@NH2	521896	0.1099	2.8034	154.549
ML1_518@O2	HIE_444@HE2	HIE_444@NE2	520912	0.1097	2.882	156.164
AP1_148@OD1	ARG_175@HH12	ARG_175@NH1	520777	0.1096	2.8603	148.958
ALA_387@O	GLN_409@HE21	GLN_409@NE2	520240	0.1095	2.8421	163.792
ASP_75@O	GLY_78@H	GLY_78@N	519906	0.1095	2.8811	153.779
GLU_135@OE2	SER_143@HG	SER_143@OG	519394	0.1093	2.6692	163.447
LEU_333@O	SER_336@H	SER_336@N	518375	0.1091	2.8883	153.359
GLU_272@OE2	GLU_272@H	GLU_272@N	517370	0.1089	2.8198	151.329
GLU_492@O	ASN_495@H	ASN_495@N	517252	0.1089	2.8988	150.077
GLU_404@OE2	ARG_434@HH12	ARG_434@NH1	516046	0.1086	2.7946	158.056
ASP_20@OD2	LYS_24@HZ2	LYS_24@NZ	512869	0.108	2.8008	155.924
ASP_190@OD2	LEU_192@H	LEU_192@N	512010	0.1078	2.884	161.149
ASP_20@OD2	LYS_24@HZ3	LYS_24@NZ	511477	0.1077	2.8005	155.915
ASP_20@OD1	LYS_24@HZ1	LYS_24@NZ	510380	0.1074	2.7994	155.765
ASP_351@O	SER_162@HG	SER_162@OG	509823	0.1073	2.7227	159.945
ALA_399@O	ARG_453@HH12	ARG_453@NH1	508546	0.1071	2.8247	150.877
GLN_12@OE1	ARG_9@H	ARG_9@N	508351	0.107	2.8739	159.936
ASP_20@OD2	LYS_24@HZ1	LYS_24@NZ	507507	0.1068	2.801	155.911
ASP_20@OD1	LYS_24@HZ2	LYS_24@NZ	507029	0.1067	2.7994	155.736
GLU_435@OE2	ARG_19@HH12	ARG_19@NH1	506085	0.1065	2.813	155.338
GLN_429@OE1	SER_343@HG	SER_343@OG	505938	0.1065	2.7055	159.911
GLU_391@OE1	ARG_453@HH22	ARG_453@NH2	505530	0.1064	2.7842	156.233
ASP_20@OD1	LYS_24@HZ3	LYS_24@NZ	505076	0.1063	2.7995	155.735
GLY_329@O	ARG_291@HH11	ARG_291@NH1	504291	0.1062	2.8326	157.069
ASP_345@OD1	ARG_19@HH12	ARG_19@NH1	503445	0.106	2.8056	162.362
PHE_112@O	GLN_116@H	GLN_116@N	502774	0.1058	2.8882	160.688
ARG_66@O	GLY_70@H	GLY_70@N	501710	0.1056	2.8911	156.451
GLN_173@OE1	ASN_340@HD22	ASN_340@ND2	501031	0.1055	2.836	162.035
ASP_248@OD2	SER_249@HG	SER_249@OG	500890	0.1055	2.7398	162.487
ASP_83@O	ASP_86@H	ASP_86@N	499951	0.1053	2.8921	149.318
GLY_337@O	THR_341@H	THR_341@N	499527	0.1052	2.8734	155.541
GLU_425@O	GLN_429@HE22	GLN_429@NE2	499356	0.1051	2.8398	162.451
GLU_176@OE1	ARG_175@HE	ARG_175@NE	496989	0.1046	2.8251	155.167
PRO_85@O	VAL_89@H	VAL_89@N	493801	0.104	2.8858	156.262
GLN_339@OE1	GLN_339@H	GLN_339@N	492200	0.1036	2.8588	149.091
SER_402@OG	ARG_453@HH22	ARG_453@NH2	490956	0.1034	2.8678	156.588
ASP_449@O	ARG_453@H	ARG_453@N	490686	0.1033	2.884	163.035
ASP_86@OD2	GLN_170@HE21	GLN_170@NE2	490453	0.1033	2.8175	162.205
SER_338@O	THR_341@H	THR_341@N	483935	0.1019	2.8884	150.696
GLU_13@OE2	ARG_9@HH21	ARG_9@NH2	483881	0.1019	2.806	154.72
GLU_13@OE1	ARG_9@HH21	ARG_9@NH2	480661	0.1012	2.8057	155.032
ASP_190@OD1	LEU_192@H	LEU_192@N	479882	0.101	2.8846	160.945
GLU_394@O	SER_397@H	SER_397@N	479090	0.1009	2.898	150.433
PRO_85@O	TRP_174@HE1	TRP_174@NE1	477289	0.1005	2.8319	152.426
PRO_10@O	GLU_13@H	GLU_13@N	476649	0.1003	2.883	145.475
GLU_394@O	SER_397@HG	SER_397@OG	475271	0.1001	2.6973	162.123
ASP_248@OD1	SER_249@HG	SER_249@OG	474481	0.0999	2.7415	162.472
GLU_145@OE2	ARG_175@HH21	ARG_175@NH2	473592	0.0997	2.801	154.875
ASP_200@OD1	ASN_226@HD22	ASN_226@ND2	469837	0.0989	2.8493	159.032
GLY_142@O	SER_146@HG	SER_146@OG	469633	0.0989	2.7559	162.636
GLU_31@OE2	ASN_28@HD22	ASN_28@ND2	465122	0.0979	2.8289	162.004
LEU_292@O	ILE_330@H	ILE_330@N	463799	0.0976	2.8786	155.372
GLY_406@O	GLN_409@HE22	GLN_409@NE2	463647	0.0976	2.8523	161.994
ALA_140@O	SER_144@HG	SER_144@OG	463148	0.0975	2.747	160.817
GLU_135@O	SER_138@H	SER_138@N	462202	0.0973	2.8951	151.835
GLU_404@OE1	ARG_453@HH22	ARG_453@NH2	461455	0.0971	2.806	153.197
GLU_132@OE1	ARG_194@HE	ARG_194@NE	461417	0.0971	2.8246	159.99
ALA_87@O	ASN_91@H	ASN_91@N	460808	0.097	2.8783	153.446
GLU_31@OE1	ASN_28@HD22	ASN_28@ND2	457975	0.0964	2.8289	161.989
GLU_13@OE2	ARG_9@HH22	ARG_9@NH2	457869	0.0964	2.7674	160.476
LEU_447@O	SER_450@HG	SER_450@OG	455574	0.0959	2.7192	161.833
GLU_435@OE2	ARG_434@HH11	ARG_434@NH1	455429	0.0959	2.7765	154.77
ASN_335@O	SER_338@H	SER_338@N	454601	0.0957	2.8961	155.907
ASP_497@OD2	ASP_498@H	ASP_498@N	453516	0.0955	2.8306	143.825
PRO_269@O	GLN_271@H	GLN_271@N	450231	0.0948	2.8557	146.78
GLU_106@OE2	TRP_172@HE1	TRP_172@NE1	449575	0.0946	2.8469	155.167
LEU_491@O	ASN_495@H	ASN_495@N	448555	0.0944	2.8758	152.492
GLU_166@OE1	ASN_347@HD22	ASN_347@ND2	447222	0.0942	2.8182	161.815
GLN_80@OE1	GLN_80@H	GLN_80@N	447002	0.0941	2.8476	149.471
GLU_404@OE1	ARG_453@HH12	ARG_453@NH1	446149	0.0939	2.7765	157.391
ASN_436@O	ARG_19@HE	ARG_19@NE	445449	0.0938	2.8314	153.79
PHE_371@O	LEU_374@H	LEU_374@N	445351	0.0938	2.9036	149.08
GLU_13@OE1	ARG_9@HH22	ARG_9@NH2	444439	0.0936	2.7648	160.504
ASN_88@O	ASN_91@H	ASN_91@N	443940	0.0935	2.8935	152.401
GLU_272@OE1	GLU_272@H	GLU_272@N	442638	0.0932	2.8187	151.141
ASP_75@OD2	SER_77@HG	SER_77@OG	442127	0.0931	2.6748	163.882
ASP_75@OD1	SER_77@HG	SER_77@OG	441913	0.093	2.6749	163.756
ASP_497@OD1	ASP_498@H	ASP_498@N	441211	0.0929	2.8307	143.832
GLU_365@OE2	SER_430@HG	SER_430@OG	439480	0.0925	2.6978	160.698
PRO_400@O	SER_402@H	SER_402@N	438709	0.0924	2.8533	146.142
GLU_13@OE1	ARG_9@HH12	ARG_9@NH1	436977	0.092	2.8463	156.132
ASP_449@O	TYR_452@H	TYR_452@N	434869	0.0916	2.888	149.059
ASP_448@OD1	ARG_453@HE	ARG_453@NE	434319	0.0914	2.8222	157.658
ASN_178@O	TRP_181@H	TRP_181@N	433450	0.0913	2.9026	154.285
ASP_448@OD2	ARG_453@HH21	ARG_453@NH2	431454	0.0908	2.8235	157.637
ASP_471@OD1	ALA_474@H	ALA_474@N	428156	0.0901	2.898	163.003
ALA_87@O	CYS_90@H	CYS_90@N	428129	0.0901	2.8912	155.433
ASP_471@OD2	ALA_474@H	ALA_474@N	427951	0.0901	2.8976	162.963
ARG_66@O	ALA_69@H	ALA_69@N	427563	0.09	2.8861	153.567
PHE_112@O	LEU_115@H	LEU_115@N	427023	0.0899	2.9034	149.544
PRO_251@O	LYS_254@H	LYS_254@N	426631	0.0898	2.8972	156.801
SER_262@O	ALA_266@H	ALA_266@N	425962	0.0897	2.8755	158.856
GLU_404@OE2	ARG_434@HH22	ARG_434@NH2	425239	0.0895	2.7979	155.812
ASP_44@OD1	THR_5@HG1	THR_5@OG1	423432	0.0891	2.7209	161.714
SER_79@O	THR_82@HG1	THR_82@OG1	423194	0.0891	2.7365	161.56
ML1_259@O5	ARG_194@HH12	ARG_194@NH1	423184	0.0891	2.8635	154.404
ASP_44@O	ALA_7@H	ALA_7@N	421112	0.0887	2.8826	155.216
ALA_93@O	TRP_181@HE1	TRP_181@NE1	420747	0.0886	2.8618	154.7
ASN_226@OD1	GLN_222@HE22	GLN_222@NE2	420063	0.0884	2.8565	154.965
LEU_511@O	VAL_514@H	VAL_514@N	419925	0.0884	2.8898	157.625
ARG_268@O	TYR_270@H	TYR_270@N	418146	0.088	2.8162	146.69
GLU_13@OE2	ARG_9@HE	ARG_9@NE	415497	0.0875	2.8183	156.559
VAL_255@O	GLN_375@HE22	GLN_375@NE2	415422	0.0875	2.8302	158.241
GLU_157@OE2	LYS_124@HZ1	LYS_124@NZ	414765	0.0873	2.7718	158.763
GLU_233@OE2	ARG_230@HE	ARG_230@NE	413607	0.0871	2.831	154.916
ARG_325@O	GLY_329@H	GLY_329@N	413203	0.087	2.8931	158.024
GLU_13@OE2	ARG_9@HH12	ARG_9@NH1	412139	0.0868	2.8515	155.798
ASP_189@OD1	SER_143@HG	SER_143@OG	411831	0.0867	2.6445	163.365
GLU_394@OE1	SER_402@HG	SER_402@OG	409891	0.0863	2.683	162.881
GLU_176@OE1	ARG_175@HH21	ARG_175@NH2	409490	0.0862	2.8195	150.247
GLU_166@OE2	ASN_347@HD22	ASN_347@ND2	409097	0.0861	2.8117	163.108
LEU_232@O	ASN_236@H	ASN_236@N	408389	0.086	2.893	151.067
ALA_7@O	ARG_9@H	ARG_9@N	406622	0.0856	2.8646	146.723
GLU_157@OE2	LYS_124@HZ3	LYS_124@NZ	405779	0.0854	2.7721	158.789
ASN_347@O	ASP_351@H	ASP_351@N	404898	0.0852	2.8618	156.669
GLU_157@OE2	LYS_124@HZ2	LYS_124@NZ	403708	0.085	2.7716	158.779
ASP_44@OD2	THR_5@H	THR_5@N	403443	0.0849	2.8477	155.856
ASP_279@OD2	ARG_278@HH21	ARG_278@NH2	403396	0.0849	2.7885	152.206
ASP_334@OD2	ARG_66@HH21	ARG_66@NH2	402893	0.0848	2.7846	158.275
GLU_97@OE1	TRP_250@HE1	TRP_250@NE1	402826	0.0848	2.816	162.051
ALA_69@O	ARG_32@HH11	ARG_32@NH1	400956	0.0844	2.8341	157.256
ASN_436@OD1	GLN_432@HE22	GLN_432@NE2	399708	0.0841	2.849	156.455
GLU_13@OE1	ARG_9@HE	ARG_9@NE	399335	0.0841	2.8188	156.551
GLU_404@OE2	ARG_453@HH22	ARG_453@NH2	399199	0.084	2.8122	153.295
PRO_179@O	ILE_182@H	ILE_182@N	398613	0.0839	2.8925	146.111
GLN_100@O	LEU_104@H	LEU_104@N	396426	0.0835	2.9184	157.913
ASN_347@O	ASN_350@H	ASN_350@N	395902	0.0833	2.8984	151.844
GLU_157@OE1	LYS_124@HZ3	LYS_124@NZ	395411	0.0832	2.7719	158.709
GLU_157@OE1	LYS_124@HZ1	LYS_124@NZ	394280	0.083	2.772	158.743
PRO_251@O	HIE_419@HE2	HIE_419@NE2	392566	0.0826	2.8177	153.767
GLU_425@OE2	ARG_428@HH11	ARG_428@NH1	392327	0.0826	2.8026	155.907
GLU_233@OE1	ARG_230@HE	ARG_230@NE	391858	0.0825	2.8309	155.055
GLY_142@O	GLU_145@H	GLU_145@N	389264	0.082	2.898	157.085
GLU_272@OE1	ARG_268@HH21	ARG_268@NH2	389207	0.0819	2.8034	155.286
SER_143@O	ML1_259@H6	ML1_259@O2	388440	0.0818	2.7757	158.872
GLY_401@O	SER_405@H	SER_405@N	388416	0.0818	2.8718	158.902
ALA_128@O	GLN_150@HE21	GLN_150@NE2	385626	0.0812	2.8386	163.667
ASP_44@OD2	SER_6@H	SER_6@N	384821	0.081	2.8466	164.286
GLU_157@OE1	LYS_124@HZ2	LYS_124@NZ	383899	0.0808	2.772	158.704
TRP_197@O	ASP_200@H	ASP_200@N	383563	0.0808	2.8886	146.952
ASP_86@OD1	GLN_170@HE21	GLN_170@NE2	382898	0.0806	2.8214	162.549
TRP_509@O	GLN_359@HE21	GLN_359@NE2	381473	0.0803	2.8316	152.454
GLU_404@OE2	ARG_453@HH12	ARG_453@NH1	380547	0.0801	2.774	158.036
CYS_90@O	ASN_178@HD21	ASN_178@ND2	380391	0.0801	2.8407	150.824
GLU_31@OE1	ARG_32@H	ARG_32@N	380059	0.08	2.8566	154.993
GLU_135@O	SER_138@HG	SER_138@OG	379916	0.08	2.6976	162.255
ASN_76@O	SER_79@H	SER_79@N	378789	0.0797	2.8915	152.99
SER_402@O	SER_405@H	SER_405@N	378357	0.0797	2.8912	149.306
GLN_359@O	LEU_363@H	LEU_363@N	377955	0.0796	2.922	157.021
GLY_353@O	TRP_440@HE1	TRP_440@NE1	377847	0.0795	2.8533	155.118
GLU_394@OE2	SER_402@HG	SER_402@OG	377550	0.0795	2.6836	163.007
SER_77@O	ASN_81@H	ASN_81@N	377480	0.0795	2.8697	158.101
GLU_311@OE1	ARG_268@HH21	ARG_268@NH2	377061	0.0794	2.799	152.174
ASP_44@OD1	THR_5@H	THR_5@N	376209	0.0792	2.851	155.801
ASP_448@OD1	SER_3@H	SER_3@N	375778	0.0791	2.8574	160.661
LEU_184@O	HIE_187@H	HIE_187@N	374633	0.0789	2.9054	149.761
GLY_78@O	ASN_81@H	ASN_81@N	374280	0.0788	2.8916	156.321
GLU_97@OE2	TRP_250@HE1	TRP_250@NE1	373976	0.0787	2.8171	161.822
PRO_141@O	SER_143@H	SER_143@N	373593	0.0787	2.8492	146.233
GLU_311@OE2	ARG_268@HH21	ARG_268@NH2	373413	0.0786	2.8001	152.71
GLU_425@OE1	GLN_429@HE22	GLN_429@NE2	371409	0.0782	2.8143	161.562
GLU_272@OE2	ARG_268@HH21	ARG_268@NH2	370760	0.0781	2.8037	154.98
ASP_448@OD1	SER_3@HG	SER_3@OG	370318	0.078	2.671	164.304
GLU_31@OE2	ARG_32@H	ARG_32@N	368253	0.0775	2.8564	154.935
GLU_166@OE1	ARG_169@HH11	ARG_169@NH1	367740	0.0774	2.7852	156.377
ALA_140@O	SER_143@H	SER_143@N	367381	0.0773	2.8938	151.493
GLU_64@OE2	ARG_66@HH11	ARG_66@NH1	366909	0.0772	2.8008	156.984
ALA_299@O	ASP_303@H	ASP_303@N	366759	0.0772	2.8632	143.335
ASP_448@OD1	SER_6@HG	SER_6@OG	366667	0.0772	2.6571	162.366
ASP_345@OD1	ARG_19@HH22	ARG_19@NH2	366262	0.0771	2.7902	160.186
ASP_279@OD2	LYS_283@HZ2	LYS_283@NZ	366258	0.0771	2.7996	155.949
SER_144@O	GLY_147@H	GLY_147@N	365879	0.077	2.8729	146.279
HIE_444@O	GLY_401@H	GLY_401@N	365706	0.077	2.874	161.224
PHE_242@O	ASP_248@H	ASP_248@N	365650	0.077	2.9022	153.694
GLU_435@OE1	ARG_434@HH11	ARG_434@NH1	364653	0.0768	2.7806	153.852
ASP_279@OD2	LYS_283@HZ1	LYS_283@NZ	364589	0.0768	2.7998	155.953
GLN_80@OE1	SER_336@HG	SER_336@OG	364539	0.0767	2.7216	160.457
TYR_27@O	ASN_76@HD22	ASN_76@ND2	364284	0.0767	2.8462	158.393
LEU_443@O	TYR_504@HH	TYR_504@OH	363021	0.0764	2.7591	160.018
GLN_12@OE1	GLN_8@H	GLN_8@N	363020	0.0764	2.844	158.362
ASP_342@OD1	ARG_428@HH12	ARG_428@NH1	361931	0.0762	2.7985	158.453
HIE_444@O	LEU_447@H	LEU_447@N	361577	0.0761	2.8743	149.764
ALA_266@O	ARG_268@H	ARG_268@N	361266	0.0761	2.8417	146.962
ASP_279@OD1	LYS_283@HZ2	LYS_283@NZ	359450	0.0757	2.8004	155.998
SER_445@OG	ALA_7@H	ALA_7@N	358806	0.0755	2.8911	160.054
ASP_279@OD2	LYS_283@HZ3	LYS_283@NZ	358322	0.0754	2.8	155.941
GLU_64@OE1	ARG_66@HH11	ARG_66@NH1	357610	0.0753	2.8001	157.045
ALA_516@O	ARG_473@HH22	ARG_473@NH2	356469	0.075	2.796	160.449
GLU_13@OE2	GLU_13@H	GLU_13@N	356411	0.075	2.8199	149.35
ASN_108@OD1	LYS_217@HZ1	LYS_217@NZ	355916	0.0749	2.8139	152.801
GLU_13@OE1	GLU_13@H	GLU_13@N	355152	0.0748	2.8185	149.016
ASP_279@OD1	LYS_283@HZ3	LYS_283@NZ	354325	0.0746	2.8005	155.998
ASP_279@OD1	LYS_283@HZ1	LYS_283@NZ	354284	0.0746	2.8007	155.993
ASN_108@OD1	LYS_217@HZ3	LYS_217@NZ	354038	0.0745	2.8139	152.796
ASN_178@OD1	TRP_181@H	TRP_181@N	353923	0.0745	2.8916	161.367
HIE_185@ND1	TYR_245@HH	TYR_245@OH	352938	0.0743	2.8566	159.902
ASN_108@OD1	LYS_217@HZ2	LYS_217@NZ	352521	0.0742	2.8142	152.782
ALA_516@OXT	ARG_473@HH12	ARG_473@NH1	351962	0.0741	2.7959	160.68
ASP_212@OD2	ALA_215@H	ALA_215@N	351839	0.0741	2.8998	162.46
ASN_88@O	ASN_178@HD22	ASN_178@ND2	350701	0.0738	2.8519	155.649
ASP_448@OD1	SER_403@HG	SER_403@OG	350087	0.0737	2.6716	164.279
GLU_58@OE2	GLN_80@HE22	GLN_80@NE2	349382	0.0736	2.7939	163.62
ASP_44@OD2	THR_5@HG1	THR_5@OG1	348966	0.0735	2.7205	161.868
GLU_484@OE1	GLN_488@HE22	GLN_488@NE2	348948	0.0735	2.8288	161.952
GLY_147@O	GLN_150@HE22	GLN_150@NE2	347146	0.0731	2.8533	160.944
ASP_243@O	ARG_278@HH21	ARG_278@NH2	344399	0.0725	2.8158	150.238
ARG_9@O	GLU_13@H	GLU_13@N	343254	0.0723	2.8778	159.851
GLU_416@OE1	LYS_383@HZ1	LYS_383@NZ	343161	0.0722	2.7726	158.366
GLU_196@O	GLY_199@H	GLY_199@N	341594	0.0719	2.8783	144.025
ASP_212@OD1	ALA_215@H	ALA_215@N	341036	0.0718	2.9001	162.371
AP1_407@O	PHE_410@H	PHE_410@N	340889	0.0718	2.8771	142.726
GLU_272@OE2	ARG_268@HE	ARG_268@NE	340073	0.0716	2.819	156.683
GLU_416@OE1	LYS_383@HZ2	LYS_383@NZ	338704	0.0713	2.7724	158.321
GLU_392@OE2	LYS_461@HZ1	LYS_461@NZ	338469	0.0713	2.795	156.91
GLU_392@OE2	LYS_461@HZ3	LYS_461@NZ	338081	0.0712	2.7953	156.928
THR_284@O	TYR_286@H	TYR_286@N	337775	0.0711	2.8223	144.982
GLU_416@OE2	LYS_383@HZ3	LYS_383@NZ	337023	0.071	2.7723	158.352
GLU_311@OE1	ARG_268@HE	ARG_268@NE	336996	0.0709	2.8059	153.311
GLU_435@OE2	ARG_434@HE	ARG_434@NE	336711	0.0709	2.8333	151.428
GLU_111@OE2	ARG_214@HH21	ARG_214@NH2	336468	0.0708	2.8009	151.073
ML1_518@O4	ML1_518@H6	ML1_518@O2	336256	0.0708	2.7953	150.298
GLU_392@OE2	LYS_461@HZ2	LYS_461@NZ	336194	0.0708	2.7946	156.904
ASP_342@OD2	ARG_428@HH12	ARG_428@NH1	335361	0.0706	2.7979	158.97
THR_46@O	VAL_50@H	VAL_50@N	335305	0.0706	2.9197	161.178
GLU_416@OE1	LYS_383@HZ3	LYS_383@NZ	335106	0.0705	2.7731	158.352
ASP_189@OD2	SER_144@H	SER_144@N	334486	0.0704	2.8629	161.296
GLU_416@OE2	LYS_383@HZ2	LYS_383@NZ	334221	0.0704	2.7724	158.292
GLU_492@OE2	ARG_489@HH11	ARG_489@NH1	334033	0.0703	2.7927	157.813
PHE_247@O	TRP_250@H	TRP_250@N	333930	0.0703	2.8914	153.3
GLN_183@O	SER_186@HG	SER_186@OG	333575	0.0702	2.712	162.097
GLU_392@OE1	LYS_461@HZ3	LYS_461@NZ	332907	0.0701	2.7951	156.894
GLU_416@OE2	LYS_383@HZ1	LYS_383@NZ	332810	0.0701	2.7727	158.309
GLU_392@OE1	LYS_461@HZ1	LYS_461@NZ	332584	0.07	2.7956	156.887
GLU_392@OE1	LYS_461@HZ2	LYS_461@NZ	332360	0.07	2.795	156.859
GLU_58@OE2	ARG_67@HH12	ARG_67@NH1	332034	0.0699	2.8052	156.736
ASP_253@OD2	ARG_67@HH21	ARG_67@NH2	331891	0.0699	2.7883	159.912
ARG_326@O	ARG_291@HH22	ARG_291@NH2	331370	0.0698	2.8216	154.02
ASP_342@OD1	ARG_428@HH22	ARG_428@NH2	329514	0.0694	2.8118	158.009
ASN_347@OD1	ASN_350@H	ASN_350@N	327770	0.069	2.8722	159.004
THR_418@O	ASN_420@H	ASN_420@N	327621	0.069	2.8936	144.844
GLN_170@OE1	ASN_340@HD21	ASN_340@ND2	327151	0.0689	2.8405	157.512
GLU_272@OE1	ARG_268@HE	ARG_268@NE	326490	0.0687	2.8191	156.308
ASP_83@OD2	ASN_177@HD21	ASN_177@ND2	326212	0.0687	2.8202	156.859
SER_3@O	SER_6@HG	SER_6@OG	326073	0.0686	2.731	161.646
GLU_435@OE1	ARG_434@HE	ARG_434@NE	325780	0.0686	2.8306	151.858
GLU_370@OE1	LYS_476@HZ3	LYS_476@NZ	325683	0.0686	2.7989	157.863
TYR_245@O	TRP_181@HE1	TRP_181@NE1	325358	0.0685	2.8502	156.256
GLU_132@OE1	ARG_194@HH12	ARG_194@NH1	324370	0.0683	2.7768	159.215
ASP_189@OD2	ARG_230@HH21	ARG_230@NH2	324083	0.0682	2.7858	160.532
GLU_370@OE2	LYS_476@HZ3	LYS_476@NZ	323747	0.0682	2.799	157.81
GLU_370@OE1	LYS_476@HZ1	LYS_476@NZ	323436	0.0681	2.799	157.909
GLU_370@OE2	LYS_476@HZ1	LYS_476@NZ	323127	0.068	2.799	157.764
GLU_370@OE2	LYS_476@HZ2	LYS_476@NZ	322958	0.068	2.7988	157.859
GLU_111@OE1	ARG_214@HH21	ARG_214@NH2	322563	0.0679	2.8012	151.507
ASP_86@O	VAL_89@H	VAL_89@N	322258	0.0678	2.8956	153.081
GLU_492@OE1	ARG_489@HH11	ARG_489@NH1	322085	0.0678	2.7935	157.846
ALA_87@O	ASN_91@HD22	ASN_91@ND2	321196	0.0676	2.8369	159.518
LEU_490@O	TYR_504@HH	TYR_504@OH	320465	0.0675	2.7622	161.755
GLU_111@OE1	LYS_217@HZ1	LYS_217@NZ	320295	0.0674	2.8036	157.347
GLU_58@OE1	GLN_80@HE22	GLN_80@NE2	319616	0.0673	2.7937	163.603
GLU_370@OE1	LYS_476@HZ2	LYS_476@NZ	319245	0.0672	2.7988	157.846
GLU_111@OE1	LYS_217@HZ2	LYS_217@NZ	318968	0.0672	2.8029	157.344
GLU_58@OE1	ARG_67@HH12	ARG_67@NH1	317846	0.0669	2.8072	156.619
GLU_135@O	SER_139@H	SER_139@N	317749	0.0669	2.8623	154.491
GLU_111@OE1	LYS_217@HZ3	LYS_217@NZ	317456	0.0668	2.8033	157.306
SER_445@O	ASP_449@H	ASP_449@N	316310	0.0666	2.8847	159.657
LEU_321@O	ASP_334@H	ASP_334@N	316198	0.0666	2.8892	160.246
PHE_493@O	ASP_497@H	ASP_497@N	315827	0.0665	2.8869	160.106
GLU_41@O	ASP_44@H	ASP_44@N	315043	0.0663	2.9097	147.904
ASN_485@OD1	GLN_481@HE22	GLN_481@NE2	313631	0.066	2.8571	155.054
GLU_484@OE2	GLN_488@HE22	GLN_488@NE2	311828	0.0656	2.8295	161.947
ASP_253@OD1	ARG_67@HE	ARG_67@NE	311536	0.0656	2.8247	161.527
GLU_455@OE1	ARG_489@HH21	ARG_489@NH2	311409	0.0656	2.8046	157.007
GLU_404@OE1	ARG_434@HH12	ARG_434@NH1	311303	0.0655	2.8025	156.076
ARG_32@O	THR_25@HG1	THR_25@OG1	310948	0.0655	2.7545	164.04
GLY_401@O	SER_403@H	SER_403@N	310714	0.0654	2.8931	146.862
ASP_334@OD1	ARG_66@HE	ARG_66@NE	310392	0.0653	2.846	157.577
ASP_44@OD1	SER_6@H	SER_6@N	310236	0.0653	2.8469	164.142
ASP_189@OD2	ASP_190@H	ASP_190@N	309927	0.0652	2.8508	143.916
LEU_33@O	ILE_71@H	ILE_71@N	309308	0.0651	2.8772	154.878
ARG_268@O	GLN_271@HE22	GLN_271@NE2	308649	0.065	2.8413	159.072
GLU_455@OE2	ARG_489@HH21	ARG_489@NH2	307798	0.0648	2.805	156.843
ALA_328@O	TYR_331@HH	TYR_331@OH	307613	0.0648	2.7515	162.749
ASP_189@OD1	ASP_190@H	ASP_190@N	307430	0.0647	2.8349	143.281
ASP_345@OD2	ARG_19@HH12	ARG_19@NH1	307405	0.0647	2.8127	161.837
GLU_111@OE2	LYS_217@HZ3	LYS_217@NZ	306717	0.0646	2.8031	157.287
GLU_111@OE2	LYS_217@HZ2	LYS_217@NZ	306408	0.0645	2.8024	157.294
ARG_326@O	ALA_328@H	ALA_328@N	305874	0.0644	2.8527	146.822
GLU_311@OE2	ARG_268@HE	ARG_268@NE	305667	0.0644	2.8072	153.107
GLU_111@OE2	LYS_217@HZ1	LYS_217@NZ	305385	0.0643	2.8028	157.292
ASP_256@OD1	GLN_100@HE22	GLN_100@NE2	305062	0.0642	2.8052	163.657
ASP_498@O	PHE_501@H	PHE_501@N	304498	0.0641	2.8941	151.873
ALA_516@O	ARG_473@HH12	ARG_473@NH1	303421	0.0639	2.7964	160.096
GLU_295@OE2	ARG_310@HH11	ARG_310@NH1	302856	0.0638	2.7947	157.732
SER_403@O	ARG_453@HH21	ARG_453@NH2	302283	0.0636	2.8239	158.023
SER_144@O	ARG_194@HH21	ARG_194@NH2	301896	0.0636	2.8364	158.322
GLU_425@OE2	GLN_429@HE22	GLN_429@NE2	300701	0.0633	2.8137	161.008
SER_405@O	GLN_409@HE22	GLN_409@NE2	300698	0.0633	2.8541	160.852
GLU_425@OE1	ARG_428@HH11	ARG_428@NH1	300643	0.0633	2.8096	155.676
ASP_334@OD1	ARG_66@HH21	ARG_66@NH2	300609	0.0633	2.7902	157.615
ALA_7@O	TYR_11@HH	TYR_11@OH	299856	0.0631	2.7423	159.828
TYR_500@O	GLY_503@H	GLY_503@N	299803	0.0631	2.8878	148.705
ALA_69@O	TYR_72@HH	TYR_72@OH	299677	0.0631	2.7492	162.767
GLY_320@O	ASN_335@H	ASN_335@N	299648	0.0631	2.8714	154.355
PHE_501@O	TYR_504@H	TYR_504@N	299501	0.0631	2.8965	153.99
GLN_442@O	SER_445@H	SER_445@N	299411	0.063	2.9	147.537
SER_77@O	ASN_81@HD22	ASN_81@ND2	298927	0.0629	2.8371	159.638
GLU_176@OE1	LYS_319@HZ1	LYS_319@NZ	298810	0.0629	2.7835	157.37
GLU_492@OE2	TYR_452@HH	TYR_452@OH	298690	0.0629	2.7047	162.587
GLU_233@OE2	ARG_230@HH11	ARG_230@NH1	298485	0.0628	2.7918	157.935
ILE_59@O	ASN_81@HD21	ASN_81@ND2	297915	0.0627	2.8594	161.118
ALA_516@OXT	ARG_473@HH22	ARG_473@NH2	297605	0.0627	2.7979	160.077
GLU_233@OE1	ARG_230@HH11	ARG_230@NH1	297202	0.0626	2.7918	157.967
ASP_253@O	GLY_68@H	GLY_68@N	297051	0.0625	2.8412	151.583
LEU_388@O	GLU_391@H	GLU_391@N	297032	0.0625	2.9008	151.642
GLU_225@OE2	GLN_229@HE22	GLN_229@NE2	296962	0.0625	2.8338	161.088
ASN_367@OD1	LYS_476@HZ1	LYS_476@NZ	296535	0.0624	2.8165	152.307
ALA_140@O	ARG_194@HH11	ARG_194@NH1	296356	0.0624	2.8376	156.864
VAL_89@O	ASP_92@H	ASP_92@N	295939	0.0623	2.8785	146.256
ASP_279@OD2	ARG_278@HE	ARG_278@NE	295849	0.0623	2.8299	150.75
ASN_367@OD1	LYS_476@HZ2	LYS_476@NZ	295784	0.0623	2.8168	152.296
AP1_148@O	PHE_151@H	PHE_151@N	295444	0.0622	2.8806	142.93
GLU_225@OE1	GLN_229@HE22	GLN_229@NE2	295084	0.0621	2.8341	161.059
ASN_367@OD1	LYS_476@HZ3	LYS_476@NZ	295060	0.0621	2.8169	152.286
GLU_492@OE1	TYR_452@HH	TYR_452@OH	294989	0.0621	2.7047	162.555
GLY_78@O	THR_82@H	THR_82@N	294621	0.062	2.8794	153.616
PRO_285@O	ASN_287@H	ASN_287@N	294614	0.062	2.8609	146.548
GLY_142@O	GLN_271@HE21	GLN_271@NE2	294580	0.062	2.8445	161.875
ILE_414@O	ALA_417@H	ALA_417@N	294162	0.0619	2.9117	146.578
GLN_271@O	GLY_274@H	GLY_274@N	293548	0.0618	2.862	151.577
ASN_340@OD1	ASN_177@HD22	ASN_177@ND2	293278	0.0617	2.8361	153.718
VAL_348@O	ASP_351@H	ASP_351@N	292284	0.0615	2.8917	148.176
SER_430@O	ARG_434@HH11	ARG_434@NH1	292087	0.0615	2.8222	149.879
ASP_86@OD2	SER_338@HG	SER_338@OG	292062	0.0615	2.6595	165.685
ASP_342@OD2	ARG_428@HH22	ARG_428@NH2	291585	0.0614	2.8146	157.483
CYS_349@O	ASP_351@H	ASP_351@N	291301	0.0613	2.8783	147.816
ALA_7@O	THR_46@H	THR_46@N	290757	0.0612	2.8856	158.062
GLU_176@O	ARG_278@HH12	ARG_278@NH1	289408	0.0609	2.8155	156.489
PRO_141@O	GLU_145@H	GLU_145@N	289245	0.0609	2.8767	155.95
GLU_295@OE1	GLU_295@H	GLU_295@N	288454	0.0607	2.8344	150.966
ASP_44@O	LYS_2@H	LYS_2@N	288229	0.0607	2.8334	159.432
ASP_334@O	SER_77@HG	SER_77@OG	287890	0.0606	2.7171	161.391
GLU_295@OE1	ARG_310@HH11	ARG_310@NH1	287359	0.0605	2.7946	157.607
PHE_501@O	LEU_505@H	LEU_505@N	287224	0.0605	2.869	155.685
SER_405@OG	GLN_12@H	GLN_12@N	286598	0.0603	2.8996	156.077
ASN_437@O	ILE_441@H	ILE_441@N	286153	0.0602	2.9084	160.262
SER_343@O	ASN_347@HD22	ASN_347@ND2	285436	0.0601	2.8478	158.998
SER_343@OG	TRP_433@HE1	TRP_433@NE1	285357	0.0601	2.8796	158.42
GLU_176@OE1	LYS_319@HZ2	LYS_319@NZ	284940	0.06	2.783	157.35
LEU_505@O	SER_508@H	SER_508@N	284083	0.0598	2.8879	154.337
GLU_176@OE1	LYS_319@HZ3	LYS_319@NZ	283916	0.0598	2.7833	157.257
ASN_88@O	ALA_93@H	ALA_93@N	283447	0.0597	2.9071	157.025
GLN_80@O	ASP_83@H	ASP_83@N	283187	0.0596	2.91	155.855
GLY_61@O	GLY_78@H	GLY_78@N	283071	0.0596	2.8381	157.05
ASN_340@OD1	GLN_339@HE22	GLN_339@NE2	282583	0.0595	2.8447	158.582
GLN_170@OE1	ASN_340@HD22	ASN_340@ND2	282580	0.0595	2.8397	160.645
ILE_281@O	THR_284@H	THR_284@N	282368	0.0594	2.9025	149.918
GLU_435@OE2	GLN_12@HE21	GLN_12@NE2	281443	0.0593	2.8197	162.515
GLU_111@OE2	ARG_214@HE	ARG_214@NE	280422	0.059	2.8195	152.846
GLU_132@OE2	ARG_194@HH11	ARG_194@NH1	280050	0.059	2.7923	161.878
GLU_295@OE2	GLU_295@H	GLU_295@N	279718	0.0589	2.8339	150.805
GLY_337@O	ASN_340@H	ASN_340@N	279677	0.0589	2.8847	153.551
THR_118@OG1	ASP_121@H	ASP_121@N	279537	0.0588	2.922	153.084
GLN_116@O	HIE_160@HE2	HIE_160@NE2	279480	0.0588	2.8609	147.309
LEU_192@O	GLU_196@H	GLU_196@N	278351	0.0586	2.8951	159.563
ASP_44@OD2	ALA_4@H	ALA_4@N	277612	0.0584	2.8397	158.736
GLU_404@OE1	HIE_444@HE2	HIE_444@NE2	276860	0.0583	2.8288	154.789
ASN_81@O	GLN_429@HE21	GLN_429@NE2	275894	0.0581	2.862	161.785
GLU_135@OE2	SER_139@HG	SER_139@OG	275564	0.058	2.6401	164.46
ASP_448@OD2	SER_402@HG	SER_402@OG	275434	0.058	2.6727	163.555
GLU_272@OE2	ARG_268@HH12	ARG_268@NH1	274663	0.0578	2.7957	161.476
GLU_58@OE1	ARG_67@HH22	ARG_67@NH2	274293	0.0577	2.8105	157.468
GLN_222@O	ASN_226@HD22	ASN_226@ND2	273934	0.0577	2.8375	159.841
ASP_189@OD1	SER_191@H	SER_191@N	273882	0.0577	2.8773	155.067
SER_146@O	GLN_150@HE22	GLN_150@NE2	273703	0.0576	2.8538	158.822
VAL_324@O	ARG_326@HH11	ARG_326@NH1	273172	0.0575	2.7954	153.385
SER_162@O	VAL_165@H	VAL_165@N	272719	0.0574	2.8943	143.953
ASP_448@OD2	SER_403@HG	SER_403@OG	272299	0.0573	2.6766	164.064
GLU_290@OE1	ASN_287@HD22	ASN_287@ND2	272267	0.0573	2.8311	161.873
ALA_516@O	ARG_214@HH22	ARG_214@NH2	271897	0.0572	2.8108	157.856
LEU_62@O	ASP_75@H	ASP_75@N	271259	0.0571	2.8979	160.05
ASP_253@OD1	ARG_67@HH21	ARG_67@NH2	269866	0.0568	2.7934	159.557
GLN_173@OE1	ASN_340@HD21	ASN_340@ND2	269116	0.0567	2.8533	159.266
LEU_390@O	ARG_393@H	ARG_393@N	268989	0.0566	2.89	146.623
GLU_13@OE2	GLN_442@HE22	GLN_442@NE2	267955	0.0564	2.8205	161.213
GLU_290@OE2	ASN_287@HD22	ASN_287@ND2	267267	0.0563	2.8309	161.863
ASP_253@OD2	ARG_67@HE	ARG_67@NE	267040	0.0562	2.824	160.896
GLU_272@OE1	ARG_268@HH22	ARG_268@NH2	266699	0.0561	2.792	161.711
GLY_401@O	GLU_404@H	GLU_404@N	265637	0.0559	2.8926	152.851
ALA_328@O	ARG_291@HE	ARG_291@NE	265596	0.0559	2.8497	152.861
SER_336@O	ASN_81@HD22	ASN_81@ND2	264895	0.0558	2.8453	159.245
TYR_504@O	PHE_506@H	PHE_506@N	264750	0.0557	2.8399	147.241
ILE_155@O	ALA_158@H	ALA_158@N	264466	0.0557	2.9125	146.256
GLU_435@OE2	LYS_60@HZ3	LYS_60@NZ	264228	0.0556	2.7833	157.021
VAL_65@O	ARG_67@HH11	ARG_67@NH1	263207	0.0554	2.8	153.429
ASP_334@OD2	ARG_66@HE	ARG_66@NE	262840	0.0553	2.8464	156.279
LEU_374@O	ALA_257@H	ALA_257@N	262830	0.0553	2.8676	156.637
PRO_179@O	GLN_183@HE22	GLN_183@NE2	262424	0.0552	2.845	159.864
GLU_435@OE2	LYS_60@HZ2	LYS_60@NZ	262398	0.0552	2.7849	156.951
ASP_253@O	ALA_69@H	ALA_69@N	261765	0.0551	2.8576	154.614
GLU_435@OE2	LYS_60@HZ1	LYS_60@NZ	261545	0.0551	2.7832	157.048
GLN_359@OE1	SER_508@HG	SER_508@OG	261475	0.055	2.7562	162.67
ASP_253@O	VAL_255@H	VAL_255@N	260898	0.0549	2.8486	148.159
GLU_391@OE2	HD2_460@HD1	HD2_460@ND1	260714	0.0549	2.7787	152.429
GLU_132@OE1	ARG_194@HH22	ARG_194@NH2	260309	0.0548	2.7903	152.907
GLN_359@OE1	LYS_487@HZ2	LYS_487@NZ	259866	0.0547	2.8061	150.88
ALA_40@O	ASP_44@H	ASP_44@N	259520	0.0546	2.8615	142.688
ASP_44@OD1	ALA_4@H	ALA_4@N	259465	0.0546	2.8446	158.43
GLU_435@OE1	LYS_60@HZ2	LYS_60@NZ	259191	0.0546	2.7852	156.933
GLU_111@OE1	ARG_214@HE	ARG_214@NE	258608	0.0544	2.8194	152.861
THR_377@OG1	ASP_380@H	ASP_380@N	258529	0.0544	2.9223	153.153
HIE_446@ND1	TYR_500@HH	TYR_500@OH	258513	0.0544	2.8474	161.406
GLN_359@OE1	LYS_487@HZ3	LYS_487@NZ	258133	0.0543	2.8064	150.917
GLY_61@O	ASN_76@H	ASN_76@N	257974	0.0543	2.8679	159.281
GLU_300@O	ASP_303@H	ASP_303@N	257576	0.0542	2.9104	147.599
ARG_326@O	ARG_291@HH12	ARG_291@NH1	257275	0.0542	2.8364	151.832
GLU_58@OE1	SER_84@HG	SER_84@OG	257266	0.0542	2.6693	163.207
ASP_448@OD2	SER_3@H	SER_3@N	257165	0.0541	2.8601	160.356
PRO_26@O	ASN_28@H	ASN_28@N	256298	0.054	2.8632	146.34
AP1_148@OD1	ML1_259@H8	ML1_259@O5	254291	0.0535	2.8113	153.211
GLU_435@OE1	LYS_60@HZ3	LYS_60@NZ	254263	0.0535	2.7853	156.945
GLU_132@OE2	ARG_194@HH12	ARG_194@NH1	253687	0.0534	2.7746	160.685
MET_149@O	TRP_172@HE1	TRP_172@NE1	253475	0.0534	2.8766	159.632
GLU_295@OE2	ARG_310@HH22	ARG_310@NH2	252979	0.0533	2.7946	157.601
GLN_359@OE1	LYS_487@HZ1	LYS_487@NZ	252103	0.0531	2.8061	150.933
GLU_435@OE1	LYS_60@HZ1	LYS_60@NZ	251940	0.053	2.7855	156.948
SER_162@O	ASN_347@HD21	ASN_347@ND2	251760	0.053	2.8666	158.898
GLU_58@OE2	ARG_67@HH22	ARG_67@NH2	250999	0.0528	2.8121	157.033
GLU_145@OE1	ARG_194@HH12	ARG_194@NH1	250471	0.0527	2.8475	148.895
ASN_335@O	GLY_78@H	GLY_78@N	250096	0.0527	2.8552	160.177
LEU_443@O	HIE_446@H	HIE_446@N	249836	0.0526	2.9009	149.833
GLU_404@OE2	HIE_444@HE2	HIE_444@NE2	249658	0.0526	2.829	154.575
GLU_311@OE1	ARG_134@HH22	ARG_134@NH2	248435	0.0523	2.8102	159.946
ASP_448@OD2	SER_3@HG	SER_3@OG	248223	0.0523	2.664	164.386
ILE_22@O	THR_25@H	THR_25@N	247149	0.052	2.9002	150.747
GLU_290@O	TYR_286@HH	TYR_286@OH	247055	0.052	2.7279	162.47
GLY_70@O	ARG_32@HH11	ARG_32@NH1	246706	0.0519	2.8328	157.085
ASP_121@OD1	LYS_513@HZ1	LYS_513@NZ	245250	0.0516	2.7957	155.651
ASP_83@OD1	GLN_339@HE21	GLN_339@NE2	245249	0.0516	2.8225	155.511
GLU_295@OE1	ARG_310@HH22	ARG_310@NH2	244928	0.0516	2.7952	157.377
PRO_344@O	SER_162@HG	SER_162@OG	244843	0.0515	2.7456	159.302
GLU_233@OE1	TYR_193@HH	TYR_193@OH	244768	0.0515	2.7097	161.812
GLN_100@OE1	LYS_228@HZ1	LYS_228@NZ	244627	0.0515	2.81	149.745
ALA_516@OXT	ARG_214@HH22	ARG_214@NH2	244155	0.0514	2.8121	157.679
ARG_32@O	TYR_27@HH	TYR_27@OH	243799	0.0513	2.7276	161.08
GLU_233@O	ASN_236@HD22	ASN_236@ND2	243408	0.0512	2.8392	157.921
GLU_435@OE1	GLN_12@HE21	GLN_12@NE2	243032	0.0512	2.8229	162.692
ALA_328@O	ARG_291@HH21	ARG_291@NH2	242772	0.0511	2.8283	151.413
GLN_100@OE1	LYS_228@HZ3	LYS_228@NZ	242718	0.0511	2.8103	149.776
ASN_287@OD1	GLY_289@H	GLY_289@N	242403	0.051	2.8749	153.624
GLU_13@OE1	GLN_442@HE22	GLN_442@NE2	242139	0.051	2.8219	161.217
LYS_211@O	ALA_213@H	ALA_213@N	241998	0.0509	2.8912	143.15
ALA_516@OXT	ARG_214@HH12	ARG_214@NH1	241870	0.0509	2.8125	158.261
TRP_433@O	ASN_436@H	ASN_436@N	241834	0.0509	2.9056	151.16
ASN_178@O	ILE_182@H	ILE_182@N	241755	0.0509	2.8985	158.026
SER_421@O	VAL_424@H	VAL_424@N	241673	0.0509	2.9004	144.748
LYS_254@O	GLN_100@HE21	GLN_100@NE2	241374	0.0508	2.8528	158.605
GLN_100@OE1	LYS_228@HZ2	LYS_228@NZ	241026	0.0507	2.8098	149.744
ASP_121@OD1	LYS_513@HZ2	LYS_513@NZ	240850	0.0507	2.7954	155.618
GLU_404@OE2	THR_5@HG1	THR_5@OG1	240822	0.0507	2.7028	158.423
LEU_131@O	ARG_134@H	ARG_134@N	239634	0.0504	2.8935	144.756
ASP_121@OD1	LYS_513@HZ3	LYS_513@NZ	239392	0.0504	2.7963	155.588
ML1_259@O4	ML1_259@H6	ML1_259@O2	239100	0.0503	2.7923	150.252
GLU_58@OE2	SER_84@HG	SER_84@OG	238950	0.0503	2.6699	163.448
GLY_320@O	ASN_335@HD22	ASN_335@ND2	238810	0.0503	2.8452	160.23
GLN_429@OE1	ASN_81@HD22	ASN_81@ND2	238554	0.0502	2.8494	158.69
THR_82@O	ASP_86@H	ASP_86@N	238549	0.0502	2.8877	157.867
ASP_189@OD2	SER_143@HG	SER_143@OG	238472	0.0502	2.6534	162.49
GLU_233@OE2	TYR_193@HH	TYR_193@OH	238033	0.0501	2.7099	161.87
GLU_132@OE2	ARG_194@HH22	ARG_194@NH2	237245	0.0499	2.7907	153.785
ASN_347@OD1	ASN_436@HD21	ASN_436@ND2	237231	0.0499	2.852	161.792
PRO_438@O	ILE_441@H	ILE_441@N	236771	0.0498	2.8914	145.284
LEU_511@O	LYS_513@H	LYS_513@N	236011	0.0497	2.8359	148.049
GLN_442@O	SER_6@HG	SER_6@OG	234450	0.0494	2.7292	160.46
GLU_394@O	SER_398@H	SER_398@N	234285	0.0493	2.8582	152.057
GLU_394@OE1	THR_5@HG1	THR_5@OG1	234142	0.0493	2.6806	162.714
GLY_244@O	ARG_278@HH22	ARG_278@NH2	232943	0.049	2.8423	148.448
GLU_176@OE2	LYS_319@HZ1	LYS_319@NZ	232269	0.0489	2.7854	156.94
ASP_342@OD2	SER_338@HG	SER_338@OG	232173	0.0489	2.6703	163.734
SER_262@O	SER_265@H	SER_265@N	232067	0.0489	2.8897	150.778
TRP_433@O	ASN_437@H	ASN_437@N	232040	0.0489	2.8959	158.447
GLU_166@OE2	ARG_169@HH11	ARG_169@NH1	231555	0.0487	2.7915	156.429
ASP_189@OD2	SER_191@H	SER_191@N	230625	0.0486	2.8797	154.992
GLU_135@OE1	TYR_270@HH	TYR_270@OH	229907	0.0484	2.7387	160.725
ALA_516@O	ARG_214@HH12	ARG_214@NH1	228857	0.0482	2.8124	158.088
GLU_13@OE1	SER_3@HG	SER_3@OG	228606	0.0481	2.6564	163.424
GLU_425@OE2	ASN_88@HD22	ASN_88@ND2	228426	0.0481	2.8178	161.177
THR_159@O	ASN_161@H	ASN_161@N	228380	0.0481	2.8918	144.933
ASN_340@O	SER_262@HG	SER_262@OG	228340	0.0481	2.7382	160.806
ASN_177@OD1	GLN_173@HE22	GLN_173@NE2	228322	0.0481	2.8518	156.676
ASP_189@OD1	GLY_142@H	GLY_142@N	228316	0.0481	2.84	158.094
GLU_31@OE2	ASN_28@H	ASN_28@N	228144	0.048	2.8609	163.084
GLU_176@O	GLN_271@HE22	GLN_271@NE2	227906	0.048	2.8411	161.363
LEU_447@O	ASP_449@H	ASP_449@N	227609	0.0479	2.855	147.093
GLU_135@OE1	SER_139@HG	SER_139@OG	227471	0.0479	2.64	164.657
LEU_184@O	TYR_245@HH	TYR_245@OH	227291	0.0479	2.787	156.383
GLU_52@OE2	ARG_428@HH21	ARG_428@NH2	227130	0.0478	2.7922	158.956
GLU_135@OE1	ARG_268@HE	ARG_268@NE	226720	0.0477	2.8171	157.509
GLU_391@OE1	HD2_460@HD1	HD2_460@ND1	226627	0.0477	2.7836	151.311
GLU_317@OE2	ARG_325@HH12	ARG_325@NH1	226529	0.0477	2.7944	158.777
LYS_261@O	SER_265@H	SER_265@N	226408	0.0477	2.8643	158.803
LEU_74@O	GLY_78@H	GLY_78@N	225759	0.0475	2.8692	157.535
GLU_176@OE2	LYS_319@HZ3	LYS_319@NZ	225708	0.0475	2.7855	156.969
ASP_75@OD2	SER_77@H	SER_77@N	225425	0.0475	2.8745	157.8
ASP_92@OD1	SER_249@HG	SER_249@OG	224943	0.0474	2.6804	163.106
GLU_311@OE2	ARG_134@HH22	ARG_134@NH2	224846	0.0473	2.8096	159.855
GLU_97@OE2	GLY_94@H	GLY_94@N	224393	0.0472	2.866	161.7
ASP_92@OD2	SER_249@HG	SER_249@OG	224304	0.0472	2.6786	163.09
GLU_176@OE2	LYS_319@HZ2	LYS_319@NZ	223783	0.0471	2.7844	156.957
PHE_371@O	GLN_375@HE22	GLN_375@NE2	223417	0.047	2.8336	158.563
GLU_166@OE1	ASN_350@HD22	ASN_350@ND2	223327	0.047	2.8199	160.032
GLU_31@OE1	ASN_28@H	ASN_28@N	223174	0.047	2.8611	163.066
ASN_161@O	ASN_350@HD22	ASN_350@ND2	223008	0.0469	2.871	161.981
GLU_404@OE1	THR_5@HG1	THR_5@OG1	222993	0.0469	2.7137	156.919
ASN_28@OD1	GLY_30@H	GLY_30@N	222117	0.0468	2.8731	153.884
ASP_253@OD1	LYS_254@H	LYS_254@N	222015	0.0467	2.8283	146.236
GLU_379@OE2	GLU_379@H	GLU_379@N	221894	0.0467	2.841	146.05
SER_162@OG	ASN_347@HD21	ASN_347@ND2	221759	0.0467	2.8814	160.785
GLU_365@OE1	SER_430@HG	SER_430@OG	221258	0.0466	2.6963	161.33
GLU_13@OE2	SER_6@HG	SER_6@OG	221030	0.0465	2.6665	165.232
ASP_507@O	GLN_359@HE21	GLN_359@NE2	220453	0.0464	2.8368	157.834
GLU_52@OE1	ARG_428@HH11	ARG_428@NH1	220208	0.0464	2.8034	157.791
GLU_133@OE1	LYS_202@HZ2	LYS_202@NZ	219706	0.0463	2.7948	157.581
GLU_133@OE1	LYS_202@HZ1	LYS_202@NZ	219152	0.0461	2.7952	157.586
GLN_267@O	GLN_183@HE22	GLN_183@NE2	219100	0.0461	2.8441	159.212
GLN_183@OE1	GLN_271@HE22	GLN_271@NE2	218872	0.0461	2.8361	160.212
GLU_52@OE2	ARG_51@HH21	ARG_51@NH2	218442	0.046	2.7827	153.811
GLU_36@OE2	GLU_36@H	GLU_36@N	218052	0.0459	2.8346	150.628
TRP_174@O	ASN_177@H	ASN_177@N	217973	0.0459	2.9019	153.878
SER_84@O	ALA_87@H	ALA_87@N	217953	0.0459	2.899	152.037
PHE_242@O	LEU_246@H	LEU_246@N	217383	0.0458	2.8743	151.343
GLU_133@OE2	LYS_202@HZ2	LYS_202@NZ	217376	0.0458	2.7949	157.577
ASP_75@OD1	SER_77@H	SER_77@N	217291	0.0457	2.874	157.698
GLU_133@OE1	LYS_202@HZ3	LYS_202@NZ	216702	0.0456	2.7951	157.551
GLU_133@OE2	LYS_202@HZ1	LYS_202@NZ	216580	0.0456	2.7954	157.535
ASN_76@O	GLN_80@H	GLN_80@N	216568	0.0456	2.8853	161.283
SER_265@O	ARG_268@HE	ARG_268@NE	216387	0.0456	2.8446	156.106
GLU_492@OE1	GLN_488@HE22	GLN_488@NE2	216060	0.0455	2.8325	162.792
PRO_510@O	LYS_513@H	LYS_513@N	216039	0.0455	2.8903	154.677
TYR_27@O	ASN_335@HD22	ASN_335@ND2	215772	0.0454	2.8499	156.021
HIE_160@ND1	GLN_116@HE21	GLN_116@NE2	215329	0.0453	2.9151	160.742
GLU_455@OE1	ASN_485@HD21	ASN_485@ND2	215280	0.0453	2.8351	159.642
GLN_100@O	GLN_100@HE22	GLN_100@NE2	215187	0.0453	2.8612	149.771
ARG_268@O	GLN_183@HE21	GLN_183@NE2	215074	0.0453	2.8459	162.447
GLU_133@OE2	LYS_202@HZ3	LYS_202@NZ	215055	0.0453	2.795	157.609
ALA_263@O	GLN_267@H	GLN_267@N	214338	0.0451	2.8885	154.759
GLU_272@OE1	ARG_268@HH12	ARG_268@NH1	214281	0.0451	2.8023	161.056
GLU_132@OE2	SER_146@HG	SER_146@OG	213427	0.0449	2.6678	163.89
GLU_135@OE2	TYR_270@HH	TYR_270@OH	213377	0.0449	2.7424	160.853
GLU_394@OE2	ARG_9@HH21	ARG_9@NH2	212943	0.0448	2.7985	152.601
ASP_189@OD2	GLY_142@H	GLY_142@N	212942	0.0448	2.837	157.359
GLU_97@OE2	LYS_254@HZ2	LYS_254@NZ	212484	0.0447	2.7983	154.957
ASP_342@O	GLN_429@HE21	GLN_429@NE2	212262	0.0447	2.8454	154.562
HIE_187@ND1	TYR_241@HH	TYR_241@OH	212155	0.0447	2.8492	157.972
SER_338@O	ALA_263@H	ALA_263@N	211679	0.0446	2.8499	160.856
PRO_510@O	ASN_495@HD21	ASN_495@ND2	211477	0.0445	2.8496	162.929
GLU_36@OE1	GLU_36@H	GLU_36@N	211090	0.0444	2.8354	150.581
GLU_272@OE1	ARG_268@HH11	ARG_268@NH1	210651	0.0443	2.7853	159.288
GLU_135@OE2	ARG_268@HH21	ARG_268@NH2	210358	0.0443	2.82	157.156
SER_143@OG	HIE_185@HE2	HIE_185@NE2	210239	0.0443	2.8744	152.054
GLU_13@OE2	SER_3@HG	SER_3@OG	209988	0.0442	2.6623	163.4
GLU_97@OE2	LYS_254@HZ1	LYS_254@NZ	209234	0.044	2.7998	154.997
SER_343@O	ALA_346@H	ALA_346@N	209150	0.044	2.9033	149.865
ASP_342@O	ASP_345@H	ASP_345@N	208275	0.0438	2.8911	147.667
GLU_379@OE1	GLU_379@H	GLU_379@N	207901	0.0438	2.8417	146.096
GLU_97@OE1	GLY_94@H	GLY_94@N	207886	0.0438	2.8673	161.532
GLU_135@OE2	SER_146@HG	SER_146@OG	207650	0.0437	2.6618	164.373
LEU_447@O	SER_450@H	SER_450@N	207345	0.0437	2.9069	153.356
ASN_347@OD1	SER_162@HG	SER_162@OG	206702	0.0435	2.7231	160.876
ASN_81@O	SER_84@H	SER_84@N	206690	0.0435	2.8898	157.491
GLU_145@OE2	ARG_194@HH12	ARG_194@NH1	206666	0.0435	2.8502	149.214
LEU_505@O	SER_508@HG	SER_508@OG	205915	0.0434	2.7288	162.164
GLU_272@OE2	ARG_268@HH22	ARG_268@NH2	205900	0.0433	2.7884	161.337
GLU_52@OE1	ARG_428@HH21	ARG_428@NH2	205562	0.0433	2.7932	158.883
GLU_97@OE2	LYS_254@HZ3	LYS_254@NZ	205469	0.0433	2.7991	154.879
ASP_507@OD2	SER_508@HG	SER_508@OG	205307	0.0432	2.7225	163.748
GLU_132@OE2	SER_144@HG	SER_144@OG	204988	0.0432	2.6902	160.521
ASP_448@OD2	SER_6@HG	SER_6@OG	204967	0.0432	2.6615	162.153
ASP_256@OD1	ALA_257@H	ALA_257@N	204769	0.0431	2.8449	144.434
GLU_317@OE1	ARG_326@HH12	ARG_326@NH1	204732	0.0431	2.8189	155.319
GLU_317@OE2	ARG_326@HH12	ARG_326@NH1	204575	0.0431	2.8193	155.432
ASN_81@OD1	ASN_436@HD21	ASN_436@ND2	204098	0.043	2.8539	153.535
TRP_250@O	ASP_253@H	ASP_253@N	203692	0.0429	2.8873	151.832
LYS_261@O	THR_264@H	THR_264@N	203604	0.0429	2.8867	152.907
ASP_253@OD2	LYS_254@H	LYS_254@N	203511	0.0428	2.8288	146.246
GLU_111@OE2	ARG_214@HH11	ARG_214@NH1	202500	0.0426	2.7912	160.079
VAL_273@O	MET_276@H	MET_276@N	202427	0.0426	2.8898	144.958
GLN_375@O	HIE_419@HE2	HIE_419@NE2	202269	0.0426	2.8547	146.376
ALA_69@O	ARG_32@HE	ARG_32@NE	201966	0.0425	2.8514	153.008
SER_338@OG	GLN_170@HE21	GLN_170@NE2	201929	0.0425	2.8812	162.285
GLU_52@OE1	ARG_51@HH21	ARG_51@NH2	201365	0.0424	2.7826	153.289
GLY_401@O	SER_405@HG	SER_405@OG	200800	0.0423	2.7603	161.213
LEU_74@O	SER_77@HG	SER_77@OG	200762	0.0423	2.7237	161.149
CYS_90@O	ASP_92@H	ASP_92@N	200299	0.0422	2.882	146.395
GLU_391@OE1	SER_6@HG	SER_6@OG	200039	0.0421	2.6534	164.631
GLU_404@OE2	GLN_12@HE21	GLN_12@NE2	199991	0.0421	2.8327	157.96
ALA_376@O	LYS_470@HZ1	LYS_470@NZ	199589	0.042	2.8129	153.348
GLU_323@OE2	ARG_325@HH22	ARG_325@NH2	199554	0.042	2.7867	155.987
ARG_67@O	ALA_69@H	ALA_69@N	199429	0.042	2.8537	146.81
GLU_317@OE1	ARG_325@HH22	ARG_325@NH2	199070	0.0419	2.816	157.258
GLU_370@OE2	ARG_473@HH11	ARG_473@NH1	199066	0.0419	2.7932	159.476
GLU_166@OE1	ARG_169@HH22	ARG_169@NH2	198909	0.0419	2.7856	160.251
ASP_190@O	SER_191@HG	SER_191@OG	198902	0.0419	2.7123	157.013
SER_338@O	THR_264@H	THR_264@N	198585	0.0418	2.85	159
GLU_97@OE1	LYS_254@HZ2	LYS_254@NZ	197839	0.0417	2.7992	154.617
ASP_515@OD1	ALA_516@H	ALA_516@N	197757	0.0416	2.8449	144.804
ALA_376@O	LYS_470@HZ3	LYS_470@NZ	197682	0.0416	2.8133	153.259
ASP_121@OD2	LYS_513@HZ1	LYS_513@NZ	197640	0.0416	2.8018	154.623
GLU_455@OE2	ASN_485@HD21	ASN_485@ND2	197461	0.0416	2.8357	159.873
ALA_376@O	LYS_470@HZ2	LYS_470@NZ	197116	0.0415	2.8132	153.256
GLU_492@OE2	GLN_488@HE22	GLN_488@NE2	197008	0.0415	2.8323	162.754
LEU_505@O	TRP_509@H	TRP_509@N	196371	0.0413	2.86	159.052
ASP_515@OD2	ALA_516@H	ALA_516@N	196362	0.0413	2.8447	144.913
ASN_88@OD1	SER_336@HG	SER_336@OG	196166	0.0413	2.7367	162.684
GLU_133@OE2	ARG_194@HH22	ARG_194@NH2	196067	0.0413	2.7801	158.842
ASP_121@OD2	LYS_513@HZ2	LYS_513@NZ	195831	0.0412	2.8023	154.766
ILE_499@O	TYR_504@H	TYR_504@N	195267	0.0411	2.8689	158.478
GLU_97@OE1	LYS_254@HZ3	LYS_254@NZ	194253	0.0409	2.7995	154.592
GLU_120@OE2	GLU_120@H	GLU_120@N	193505	0.0407	2.8417	146.269
ASP_121@OD2	LYS_513@HZ3	LYS_513@NZ	193143	0.0407	2.8025	154.699
ARG_67@O	ARG_32@HH12	ARG_32@NH1	192920	0.0406	2.8315	152.762
GLU_41@OE2	SER_3@H	SER_3@N	192755	0.0406	2.8407	160.975
GLU_323@O	ARG_325@H	ARG_325@N	192565	0.0405	2.8771	146.393
SER_398@O	GLN_12@HE22	GLN_12@NE2	192528	0.0405	2.8438	158.234
LEU_57@O	VAL_63@H	VAL_63@N	192472	0.0405	2.9177	158.29
ASP_75@O	SER_77@H	SER_77@N	192354	0.0405	2.861	146.063
GLU_36@OE1	ARG_51@HH11	ARG_51@NH1	192143	0.0405	2.7942	157.816
PRO_344@O	ASN_347@HD22	ASN_347@ND2	191694	0.0404	2.8391	158.661
GLU_97@OE1	LYS_254@HZ1	LYS_254@NZ	191222	0.0403	2.7999	154.401
GLU_135@OE1	ARG_268@HH21	ARG_268@NH2	190988	0.0402	2.8195	155.455
GLU_166@OE1	ASN_350@HD21	ASN_350@ND2	190903	0.0402	2.8302	160.641
GLU_135@OE1	SER_138@HG	SER_138@OG	190859	0.0402	2.6942	163.197
GLU_41@OE1	SER_3@H	SER_3@N	190801	0.0402	2.84	160.956
PRO_251@O	ASP_253@H	ASP_253@N	190692	0.0401	2.8764	145.872
GLN_386@O	GLN_389@H	GLN_389@N	190591	0.0401	2.896	148.597
ASN_347@OD1	CYS_349@H	CYS_349@N	190427	0.0401	2.8765	152.51
LEU_491@O	SER_494@H	SER_494@N	190316	0.0401	2.8993	150.059
GLU_145@OE2	ARG_194@HH11	ARG_194@NH1	189577	0.0399	2.7893	153.894
GLU_120@OE1	GLU_120@H	GLU_120@N	189544	0.0399	2.8425	146.21
PHE_168@O	SER_171@HG	SER_171@OG	189305	0.0399	2.7615	156.936
TRP_431@O	TYR_11@HH	TYR_11@OH	188870	0.0398	2.7769	155.501
GLU_133@OE1	ARG_194@HH22	ARG_194@NH2	188186	0.0396	2.7805	158.893
GLU_166@OE2	ASN_340@HD22	ASN_340@ND2	188069	0.0396	2.8156	162.374
GLU_394@OE2	THR_5@HG1	THR_5@OG1	187689	0.0395	2.6822	162.939
GLU_135@OE2	SER_138@HG	SER_138@OG	187406	0.0395	2.6924	163.381
ASP_342@OD1	THR_341@HG1	THR_341@OG1	187387	0.0394	2.6985	162.653
ASN_340@O	GLN_429@HE21	GLN_429@NE2	187248	0.0394	2.8639	159.732
PRO_344@O	ALA_346@H	ALA_346@N	187186	0.0394	2.8571	147.569
LEU_316@O	GLY_320@H	GLY_320@N	186961	0.0394	2.8644	146.211
CYS_90@O	ALA_93@H	ALA_93@N	186894	0.0393	2.9106	157.53
VAL_514@O	ALA_516@H	ALA_516@N	186624	0.0393	2.8745	146.804
GLU_176@O	GLN_271@HE21	GLN_271@NE2	186378	0.0392	2.8365	161.354
GLU_492@O	VAL_496@H	VAL_496@N	186355	0.0392	2.8751	156.107
ASP_334@OD2	SER_336@HG	SER_336@OG	186146	0.0392	2.6615	164.366
GLU_166@OE1	ASN_347@HD21	ASN_347@ND2	186138	0.0392	2.836	158.522
GLU_317@OE1	ARG_325@HH12	ARG_325@NH1	185628	0.0391	2.7966	157.922
GLU_132@O	GLU_135@H	GLU_135@N	185626	0.0391	2.8932	146.707
GLU_225@O	GLN_229@HE22	GLN_229@NE2	185447	0.039	2.8613	158.683
GLU_41@OE2	SER_3@HG	SER_3@OG	185409	0.039	2.6716	163.995
ASN_91@OD1	ALA_93@H	ALA_93@N	185298	0.039	2.9063	160.512
ASN_437@OD1	TRP_440@H	TRP_440@N	185194	0.039	2.8893	160.303
ASN_28@OD1	ASN_335@H	ASN_335@N	185170	0.039	2.8582	151.448
GLU_370@OE1	ARG_473@HH11	ARG_473@NH1	184954	0.0389	2.7922	159.2
ASP_44@OD1	SER_3@HG	SER_3@OG	184816	0.0389	2.6305	163.703
GLY_244@O	TRP_181@HE1	TRP_181@NE1	184606	0.0389	2.8488	147.69
ASP_189@OD1	SER_143@H	SER_143@N	184419	0.0388	2.8471	151.438
LEU_232@O	ASN_236@HD21	ASN_236@ND2	184312	0.0388	2.8356	159.489
ASP_334@OD2	TYR_286@HH	TYR_286@OH	184304	0.0388	2.7023	161.627
SER_3@O	SER_6@H	SER_6@N	184265	0.0388	2.9039	155.014
GLU_41@OE1	SER_3@HG	SER_3@OG	184172	0.0388	2.6691	163.983
GLU_272@OE2	GLN_183@HE22	GLN_183@NE2	184148	0.0388	2.816	162.824
ALA_69@O	ARG_32@HH21	ARG_32@NH2	183572	0.0386	2.8304	151.692
ASN_91@O	ALA_93@H	ALA_93@N	183280	0.0386	2.8219	147.942
SER_494@O	VAL_496@H	VAL_496@N	182631	0.0384	2.8629	146.766
ARG_67@O	ARG_32@HH22	ARG_32@NH2	182438	0.0384	2.8275	152.882
GLU_391@O	GLU_394@H	GLU_394@N	182156	0.0383	2.8938	145.373
GLU_133@OE2	ARG_134@HH21	ARG_134@NH2	182071	0.0383	2.8228	155.174
GLN_409@O	GLN_409@HE22	GLN_409@NE2	181680	0.0382	2.8452	151.637
ASN_88@O	ASP_92@H	ASP_92@N	181594	0.0382	2.868	158.087
ASN_178@OD1	ARG_278@HH12	ARG_278@NH1	181128	0.0381	2.8289	154.019
ASP_20@O	THR_25@HG1	THR_25@OG1	181031	0.0381	2.7252	160.24
GLU_13@OE1	SER_6@HG	SER_6@OG	180605	0.038	2.665	165.269
ASP_86@OD1	SER_338@H	SER_338@N	180581	0.038	2.8649	156.479
GLU_176@OE2	ARG_175@HH21	ARG_175@NH2	180194	0.0379	2.803	152.332
PRO_85@O	ASN_88@H	ASN_88@N	179824	0.0379	2.9017	152.292
GLU_455@O	GLY_458@H	GLY_458@N	179480	0.0378	2.8771	142.917
ARG_19@O	LYS_24@H	LYS_24@N	179318	0.0378	2.86	161.012
GLU_13@OE2	SER_6@H	SER_6@N	178760	0.0376	2.8475	160.059
GLU_52@OE2	ARG_428@HH11	ARG_428@NH1	178644	0.0376	2.8046	157.271
ILE_368@O	PHE_371@H	PHE_371@N	178554	0.0376	2.8987	143.448
GLN_429@OE1	GLN_170@HE22	GLN_170@NE2	178268	0.0375	2.8436	160.119
GLU_317@OE2	ARG_325@HH21	ARG_325@NH2	178143	0.0375	2.7884	155.715
ASN_335@O	GLN_173@HE21	GLN_173@NE2	177355	0.0373	2.8563	159.267
GLU_132@OE1	SER_146@HG	SER_146@OG	177151	0.0373	2.6635	163.876
GLU_13@OE2	HIE_446@HE2	HIE_446@NE2	177122	0.0373	2.8287	157.788
GLU_133@OE1	ARG_134@HH21	ARG_134@NH2	176891	0.0372	2.8243	155.05
ASP_507@OD1	SER_508@HG	SER_508@OG	176842	0.0372	2.723	163.751
GLU_323@OE2	ARG_325@H	ARG_325@N	176824	0.0372	2.8676	160.577
GLU_311@OE2	ARG_134@HH12	ARG_134@NH1	176796	0.0372	2.8203	156.166
GLY_199@O	GLN_203@HE22	GLN_203@NE2	176643	0.0372	2.8567	159.188
TYR_11@O	VAL_14@H	VAL_14@N	176623	0.0372	2.8935	147.516
GLU_132@OE1	SER_144@HG	SER_144@OG	176385	0.0371	2.6903	160.365
LEU_321@O	ASN_335@HD22	ASN_335@ND2	176047	0.0371	2.8416	158.634
GLU_272@OE2	ARG_268@HH11	ARG_268@NH1	175490	0.0369	2.786	159.012
ALA_516@OXT	ARG_119@HH21	ARG_119@NH2	175069	0.0369	2.8039	156.341
ASP_83@OD1	LYS_319@HZ3	LYS_319@NZ	174419	0.0367	2.7861	156.736
ASP_449@OD2	SER_450@H	SER_450@N	174368	0.0367	2.8229	142.767
GLU_394@OE2	ARG_9@HE	ARG_9@NE	174042	0.0366	2.8322	152.521
GLU_166@OE2	GLN_339@HE21	GLN_339@NE2	173577	0.0365	2.8185	161.346
GLU_36@OE2	ARG_51@HH11	ARG_51@NH1	173552	0.0365	2.7941	157.717
ML1_259@O3	HIE_185@HE2	HIE_185@NE2	173391	0.0365	2.8719	152.203
GLU_135@OE2	ARG_268@HE	ARG_268@NE	173258	0.0365	2.8221	157.553
GLU_111@OE1	ARG_214@HH11	ARG_214@NH1	173231	0.0365	2.7931	160.279
ASP_83@OD2	GLY_337@H	GLY_337@N	173183	0.0365	2.8714	161.483
ASP_342@OD1	GLN_432@HE21	GLN_432@NE2	172937	0.0364	2.8306	161.007
ALA_516@O	ARG_119@HH21	ARG_119@NH2	172809	0.0364	2.8042	156.435
GLN_173@O	ASN_340@HD21	ASN_340@ND2	172295	0.0363	2.8499	146.482
ASP_83@OD1	LYS_319@HZ1	LYS_319@NZ	172289	0.0363	2.7868	156.679
ASP_448@OD1	SER_403@H	SER_403@N	171836	0.0362	2.8519	159.428
ALA_399@O	GLN_12@HE22	GLN_12@NE2	171767	0.0362	2.84	156.483
SER_265@O	ARG_268@HH11	ARG_268@NH1	171191	0.036	2.8365	156.972
GLU_135@OE1	SER_146@HG	SER_146@OG	170922	0.036	2.6655	164.041
SER_235@O	VAL_237@H	VAL_237@N	170830	0.036	2.8638	146.19
ASP_334@O	GLY_337@H	GLY_337@N	170758	0.0359	2.89	155.44
ASP_449@OD1	SER_450@H	SER_450@N	170743	0.0359	2.8231	142.758
GLN_150@O	GLN_150@HE22	GLN_150@NE2	170702	0.0359	2.8527	151.418
ASP_190@OD2	TYR_193@H	TYR_193@N	170589	0.0359	2.8704	161.202
ASP_83@OD1	LYS_319@HZ2	LYS_319@NZ	170420	0.0359	2.7873	156.55
GLU_97@OE2	ASN_420@HD22	ASN_420@ND2	170321	0.0359	2.7962	157.513
GLN_481@O	ASN_485@HD22	ASN_485@ND2	170279	0.0358	2.8552	156.803
GLY_327@O	TYR_331@HH	TYR_331@OH	169747	0.0357	2.7494	163.967
ASP_256@OD2	ALA_257@H	ALA_257@N	169327	0.0356	2.8464	145.009
GLU_13@OE1	HIE_446@HE2	HIE_446@NE2	169156	0.0356	2.8292	157.909
GLU_323@OE1	ARG_325@H	ARG_325@N	168969	0.0356	2.8648	160.016
GLU_311@OE1	ARG_134@HH12	ARG_134@NH1	168548	0.0355	2.8188	156.214
ASP_190@OD1	TYR_193@H	TYR_193@N	168141	0.0354	2.8699	161.21
CYS_90@O	TRP_250@H	TRP_250@N	167759	0.0353	2.8744	160.795
GLU_317@OE1	ARG_325@HH21	ARG_325@NH2	167456	0.0353	2.7896	155.868
ASP_83@OD1	ASN_177@HD21	ASN_177@ND2	167353	0.0352	2.8372	153.275
GLY_353@O	GLU_356@H	GLU_356@N	167346	0.0352	2.905	151.091
GLU_272@O	ALA_275@H	ALA_275@N	167113	0.0352	2.8956	148.523
GLN_359@O	GLN_359@HE22	GLN_359@NE2	166647	0.0351	2.8602	149.617
MET_260@O	SER_262@H	SER_262@N	166518	0.0351	2.8063	148.853
GLU_392@OE2	ARG_393@HH21	ARG_393@NH2	166393	0.035	2.819	155.871
GLU_38@O	GLU_41@H	GLU_41@N	166357	0.035	2.8953	144.778
ASN_81@OD1	ASP_345@H	ASP_345@N	166271	0.035	2.8777	159.696
ASN_350@O	ALA_352@H	ALA_352@N	166203	0.035	2.8433	146.612
GLU_425@OE1	ASN_88@HD22	ASN_88@ND2	166166	0.035	2.8221	160.51
ASP_190@OD2	ARG_230@HH22	ARG_230@NH2	165964	0.0349	2.8009	159.08
GLU_272@OE1	SER_143@HG	SER_143@OG	165479	0.0348	2.6811	162.867
GLN_271@OE1	ARG_268@H	ARG_268@N	164983	0.0347	2.8555	160.726
LEU_57@O	GLY_61@H	GLY_61@N	164518	0.0346	2.8677	145.287
ASP_75@O	GLN_80@H	GLN_80@N	164348	0.0346	2.8921	161.564
GLU_317@OE2	ARG_325@HH22	ARG_325@NH2	164254	0.0346	2.8188	156.484
TRP_250@O	ASP_92@H	ASP_92@N	164185	0.0346	2.8725	155.343
ASP_449@O	LEU_451@H	LEU_451@N	163696	0.0345	2.8472	144.832
LEU_364@O	ASN_367@H	ASN_367@N	163006	0.0343	2.9043	142.643
LEU_129@O	GLU_132@H	GLU_132@N	162767	0.0343	2.899	148.776
GLU_392@OE1	ARG_393@HH21	ARG_393@NH2	162573	0.0342	2.8203	155.661
PRO_141@O	THR_264@HG1	THR_264@OG1	161769	0.0341	2.7449	162.74
THR_341@OG1	GLN_429@HE21	GLN_429@NE2	161624	0.034	2.8892	162.077
GLN_339@O	SER_343@HG	SER_343@OG	161615	0.034	2.7475	160.505
ILE_22@O	SER_77@HG	SER_77@OG	161466	0.034	2.7679	155.927
ASP_189@OD2	SER_143@H	SER_143@N	161427	0.034	2.859	156.994
VAL_514@O	GLN_116@HE22	GLN_116@NE2	161319	0.034	2.8393	159.329
ASP_44@OD2	SER_3@HG	SER_3@OG	160875	0.0339	2.6332	163.802
VAL_89@O	GLY_94@H	GLY_94@N	160638	0.0338	2.8558	156.54
GLU_323@OE2	ARG_325@HH11	ARG_325@NH1	160519	0.0338	2.7933	156.219
ASP_345@O	VAL_348@H	VAL_348@N	160470	0.0338	2.8844	148.219
ASP_342@O	ARG_428@HH22	ARG_428@NH2	160306	0.0337	2.826	155.737
GLU_52@OE1	ARG_51@HE	ARG_51@NE	160234	0.0337	2.8325	151.886
GLU_52@OE1	ARG_428@HE	ARG_428@NE	159975	0.0337	2.842	157.15
GLN_8@OE1	THR_46@H	THR_46@N	159679	0.0336	2.8726	157.901
THR_264@O	GLN_267@H	GLN_267@N	159331	0.0335	2.8907	153.113
ASP_459@OD2	ASN_485@HD21	ASN_485@ND2	159023	0.0335	2.8246	160.762
GLU_394@OE1	ARG_9@HH21	ARG_9@NH2	159019	0.0335	2.7986	153.422
ASP_334@OD2	ARG_278@HH21	ARG_278@NH2	158970	0.0335	2.8204	156.683
GLN_429@OE1	ASN_340@HD22	ASN_340@ND2	158776	0.0334	2.8431	160.826
ASP_334@OD1	TYR_286@HH	TYR_286@OH	158561	0.0334	2.7033	161.941
ASP_448@O	ARG_453@HH11	ARG_453@NH1	158526	0.0334	2.8397	157.255
GLU_365@OE1	TRP_431@HE1	TRP_431@NE1	158426	0.0334	2.8448	157.946
ASP_86@OD2	SER_338@H	SER_338@N	158226	0.0333	2.8606	153.553
GLU_492@O	ASN_495@HD22	ASN_495@ND2	158104	0.0333	2.8485	158.234
GLU_52@OE2	ARG_51@HE	ARG_51@NE	157662	0.0332	2.8348	151.518
GLY_68@O	GLY_70@H	GLY_70@N	157567	0.0332	2.8542	146.405
ASP_83@OD2	THR_82@HG1	THR_82@OG1	157356	0.0331	2.721	163.338
LEU_316@O	VAL_322@H	VAL_322@N	157287	0.0331	2.9165	159.23
ASP_189@OD1	SER_144@H	SER_144@N	157262	0.0331	2.8772	159.71
GLU_145@OE2	GLN_271@HE22	GLN_271@NE2	157186	0.0331	2.8186	159.359
GLU_404@O	AP1_407@H	AP1_407@N	157138	0.0331	2.9012	158.919
ASP_342@OD1	SER_338@HG	SER_338@OG	156480	0.0329	2.6715	163.653
ASN_81@OD1	GLN_429@HE21	GLN_429@NE2	155708	0.0328	2.8477	158.376
GLY_458@O	GLN_462@HE22	GLN_462@NE2	155670	0.0328	2.859	159.211
SER_186@O	SER_262@HG	SER_262@OG	155513	0.0327	2.7105	159.668
ASP_448@OD1	SER_402@HG	SER_402@OG	155168	0.0327	2.6897	162.679
GLU_435@OE1	ARG_434@HH21	ARG_434@NH2	154912	0.0326	2.7889	155.372
GLU_394@OE2	SER_6@HG	SER_6@OG	154651	0.0326	2.6659	162.917
GLU_323@OE2	SER_338@HG	SER_338@OG	154558	0.0325	2.6802	162.733
LEU_374@O	LYS_470@HZ3	LYS_470@NZ	154361	0.0325	2.8406	151.463
ASN_76@OD1	GLN_339@HE22	GLN_339@NE2	154287	0.0325	2.841	159.932
ALA_399@O	ARG_453@HH22	ARG_453@NH2	153977	0.0324	2.8518	150.212
PRO_344@O	CYS_349@H	CYS_349@N	153943	0.0324	2.8788	160.18
PRO_10@O	GLN_12@H	GLN_12@N	153840	0.0324	2.8557	147.768
THR_264@O	GLN_267@HE22	GLN_267@NE2	153695	0.0324	2.8592	160.687
GLU_272@OE1	GLN_183@HE22	GLN_183@NE2	153619	0.0323	2.8183	162.723
GLN_80@O	SER_84@HG	SER_84@OG	153237	0.0323	2.7352	160.93
LEU_374@O	LYS_470@HZ2	LYS_470@NZ	153216	0.0323	2.8407	151.419
LEU_374@O	LYS_470@HZ1	LYS_470@NZ	152740	0.0322	2.8402	151.435
HIE_419@ND1	GLN_375@HE21	GLN_375@NE2	152734	0.0322	2.9143	159.672
TRP_181@O	TYR_245@HH	TYR_245@OH	152020	0.032	2.8257	158.917
ILE_277@O	LEU_280@H	LEU_280@N	151814	0.032	2.8893	143.894
ASP_448@OD2	SER_402@H	SER_402@N	151812	0.032	2.8658	157.365
PRO_269@O	ARG_268@HH11	ARG_268@NH1	151651	0.0319	2.843	152.498
ALA_266@O	GLN_271@HE22	GLN_271@NE2	151230	0.0318	2.8451	157.95
GLU_297@OE1	ARG_296@HH11	ARG_296@NH1	151148	0.0318	2.7958	157.876
GLN_267@OE1	GLN_267@H	GLN_267@N	151047	0.0318	2.838	148.238
GLU_323@OE1	ARG_326@HH21	ARG_326@NH2	150396	0.0317	2.8029	154.062
GLN_173@O	GLU_176@H	GLU_176@N	150206	0.0316	2.8921	149.823
ALA_4@O	TYR_11@HH	TYR_11@OH	150167	0.0316	2.7405	157.511
ASP_20@O	ILE_23@H	ILE_23@N	149786	0.0315	2.8994	147.816
PRO_510@O	HIE_160@HE2	HIE_160@NE2	149708	0.0315	2.8296	155.53
ASP_380@OD2	LYS_254@HZ2	LYS_254@NZ	149560	0.0315	2.7887	153.58
ASP_92@OD2	SER_421@HG	SER_421@OG	149514	0.0315	2.6546	163.658
GLU_176@OE1	ARG_175@HH11	ARG_175@NH1	149398	0.0315	2.7686	155.752
ASP_83@OD1	THR_82@HG1	THR_82@OG1	149176	0.0314	2.7224	163.277
GLU_166@OE2	ASN_347@HD21	ASN_347@ND2	149154	0.0314	2.8374	158.57
THR_159@O	ASN_350@HD21	ASN_350@ND2	149103	0.0314	2.8385	148.347
AP1_148@OD2	ML1_259@H8	ML1_259@O5	148933	0.0314	2.9032	151.383
GLU_425@O	GLN_170@HE21	GLN_170@NE2	148850	0.0313	2.8505	156.012
GLU_13@OE1	SER_6@H	SER_6@N	148564	0.0313	2.8456	160.158
ASN_335@O	ASN_177@HD22	ASN_177@ND2	148516	0.0313	2.8572	159.969
ASP_334@OD1	ARG_278@HE	ARG_278@NE	148464	0.0313	2.8117	160.695
GLN_8@O	GLN_409@HE21	GLN_409@NE2	148426	0.0312	2.8671	161.546
SER_6@O	GLN_8@H	GLN_8@N	148130	0.0312	2.8556	146.92
ALA_257@O	GLN_103@HE21	GLN_103@NE2	147725	0.0311	2.8403	161.816
GLU_157@OE2	SER_262@HG	SER_262@OG	147518	0.0311	2.6716	163.605
GLU_404@OE2	GLU_404@H	GLU_404@N	147417	0.031	2.8301	149.576
ASP_512@O	GLN_488@HE21	GLN_488@NE2	147413	0.031	2.8435	159.414
GLU_297@OE2	ARG_296@HH11	ARG_296@NH1	147218	0.031	2.7964	158.046
GLU_36@OE2	ARG_37@H	ARG_37@N	146955	0.0309	2.8454	146.48
GLY_68@O	TYR_72@HH	TYR_72@OH	146688	0.0309	2.7393	163.702
ASP_380@OD2	LYS_254@HZ1	LYS_254@NZ	146589	0.0309	2.7888	153.559
GLU_133@OE1	ARG_134@HE	ARG_134@NE	146451	0.0308	2.8154	157.39
GLU_317@OE2	ARG_325@HE	ARG_325@NE	146123	0.0308	2.8285	155.161
GLU_416@OE2	ARG_51@HH22	ARG_51@NH2	146014	0.0307	2.7901	153.62
ALA_516@OXT	LYS_476@HZ1	LYS_476@NZ	145964	0.0307	2.7777	158.204
ASP_83@OD2	ARG_428@HH22	ARG_428@NH2	145797	0.0307	2.7955	154.64
MET_422@O	GLU_425@H	GLU_425@N	145786	0.0307	2.8861	143.592
ALA_516@OXT	LYS_476@HZ2	LYS_476@NZ	145631	0.0307	2.7778	158.203
GLU_323@OE2	ARG_326@HH21	ARG_326@NH2	145628	0.0307	2.8033	153.948
ALA_516@OXT	LYS_476@HZ3	LYS_476@NZ	145409	0.0306	2.7779	158.196
GLU_133@OE2	ARG_134@HE	ARG_134@NE	145334	0.0306	2.8157	157.306
ASP_342@OD2	LYS_261@H	LYS_261@N	145254	0.0306	2.8331	156.491
ML1_259@O2	ARG_194@HH22	ARG_194@NH2	144897	0.0305	2.8901	152.384
PRO_179@O	GLN_183@HE21	GLN_183@NE2	144757	0.0305	2.8105	163.769
ASP_83@OD2	LYS_319@HZ2	LYS_319@NZ	144751	0.0305	2.7754	155.06
ASP_342@OD1	LYS_261@H	LYS_261@N	144648	0.0305	2.8294	156.314
ALA_360@O	LEU_363@H	LEU_363@N	144610	0.0304	2.914	145.754
ASP_380@OD2	LYS_254@HZ3	LYS_254@NZ	144486	0.0304	2.7891	153.544
GLU_297@O	GLU_300@H	GLU_300@N	144413	0.0304	2.8957	144.474
GLY_320@O	GLN_173@HE22	GLN_173@NE2	144191	0.0304	2.8561	160.78
CYS_349@O	ASN_437@HD22	ASN_437@ND2	144109	0.0303	2.8401	154.577
ASN_88@OD1	ASN_91@HD22	ASN_91@ND2	144077	0.0303	2.8585	156.895
ALA_399@O	SER_402@H	SER_402@N	144046	0.0303	2.8997	154.353
GLU_36@OE1	ARG_37@H	ARG_37@N	143994	0.0303	2.8455	146.46
ALA_158@O	LYS_513@HZ3	LYS_513@NZ	143914	0.0303	2.8158	154.714
ASP_345@OD2	ASN_436@HD21	ASN_436@ND2	143652	0.0302	2.8309	160.871
LEU_511@O	ASP_515@H	ASP_515@N	143394	0.0302	2.8712	160.129
ALA_158@O	LYS_513@HZ1	LYS_513@NZ	143257	0.0302	2.8155	154.691
ASN_76@OD1	GLN_80@HE22	GLN_80@NE2	143232	0.0302	2.8446	160.514
GLU_166@OE1	GLN_339@HE21	GLN_339@NE2	143092	0.0301	2.8182	161.375
ASP_75@O	SER_79@H	SER_79@N	142986	0.0301	2.8767	155.87
GLU_97@OE1	ASN_420@HD22	ASN_420@ND2	142929	0.0301	2.7952	157.584
ILE_109@O	PHE_112@H	PHE_112@N	142862	0.0301	2.8963	142.943
GLU_196@OE1	LYS_195@HZ3	LYS_195@NZ	142732	0.03	2.7756	157.114
ALA_417@O	LYS_254@HZ1	LYS_254@NZ	142610	0.03	2.8162	154.582
ASP_189@OD2	ARG_230@HH11	ARG_230@NH1	142587	0.03	2.7862	153.726
GLU_196@OE1	LYS_195@HZ2	LYS_195@NZ	142561	0.03	2.7754	157.138
GLU_166@OE2	ARG_169@HH22	ARG_169@NH2	142427	0.03	2.785	159.34
ASP_256@OD1	LYS_228@HZ2	LYS_228@NZ	142396	0.03	2.8026	154.77
GLU_166@OE2	ASN_350@HD21	ASN_350@ND2	142361	0.03	2.8304	160.474
ALA_417@O	LYS_254@HZ3	LYS_254@NZ	142330	0.03	2.8157	154.656
GLU_435@OE2	ARG_434@HH21	ARG_434@NH2	142171	0.0299	2.7917	154.431
ASN_177@O	GLN_339@HE21	GLN_339@NE2	142010	0.0299	2.8448	160.735
LYS_2@O	THR_48@HG1	THR_48@OG1	141945	0.0299	2.7206	161.118
LYS_319@O	ASN_177@HD21	ASN_177@ND2	141932	0.0299	2.8464	157.997
ALA_158@O	LYS_513@HZ2	LYS_513@NZ	141892	0.0299	2.815	154.679
ARG_134@O	ALA_137@H	ALA_137@N	141685	0.0298	2.9028	148.534
ASP_256@OD1	LYS_228@HZ3	LYS_228@NZ	141617	0.0298	2.8039	154.859
ASP_83@OD2	LYS_319@HZ1	LYS_319@NZ	141604	0.0298	2.7758	155.043
ALA_417@O	LYS_254@HZ2	LYS_254@NZ	141308	0.0297	2.8165	154.612
GLU_52@OE2	ARG_428@HE	ARG_428@NE	140777	0.0296	2.8482	156.475
GLN_173@OE1	ASN_177@HD22	ASN_177@ND2	140775	0.0296	2.8401	161.422
ASP_92@OD1	SER_421@HG	SER_421@OG	140655	0.0296	2.6539	163.661
LEU_74@O	SER_77@H	SER_77@N	140617	0.0296	2.8971	152.246
GLU_196@OE2	LYS_195@HZ1	LYS_195@NZ	140387	0.0296	2.7754	157.164
ASP_83@OD1	ARG_428@HH22	ARG_428@NH2	139946	0.0295	2.7953	154.53
ASP_256@OD1	LYS_228@HZ1	LYS_228@NZ	139853	0.0294	2.8027	154.819
GLU_323@OE1	SER_338@HG	SER_338@OG	139844	0.0294	2.6786	163.017
GLU_196@OE1	LYS_195@HZ1	LYS_195@NZ	139806	0.0294	2.7753	157.159
GLU_392@OE1	ARG_393@HE	ARG_393@NE	139710	0.0294	2.8102	158.06
GLU_317@OE1	ARG_325@HE	ARG_325@NE	139341	0.0293	2.8293	155.417
GLU_323@OE1	ARG_325@HH22	ARG_325@NH2	139134	0.0293	2.7926	156.23
GLU_176@OE2	ARG_175@HE	ARG_175@NE	138875	0.0292	2.8196	152.982
GLU_323@OE1	ARG_325@HH11	ARG_325@NH1	138375	0.0291	2.7945	156.505
GLU_196@OE2	LYS_195@HZ2	LYS_195@NZ	138339	0.0291	2.7757	157.163
GLU_157@OE1	SER_262@HG	SER_262@OG	138153	0.0291	2.6724	163.638
VAL_322@O	GLN_339@HE22	GLN_339@NE2	138084	0.0291	2.8166	158.9
GLU_295@OE1	ARG_296@H	ARG_296@N	138043	0.0291	2.8467	146.293
ASP_345@OD1	ASN_436@HD21	ASN_436@ND2	137839	0.029	2.8306	160.505
PHE_493@O	ASN_495@H	ASN_495@N	137572	0.029	2.8058	148.236
ASP_189@O	SER_262@H	SER_262@N	136993	0.0288	2.8379	156.731
GLU_435@OE2	TRP_431@HE1	TRP_431@NE1	136864	0.0288	2.8406	152.698
ILE_441@O	HIE_444@H	HIE_444@N	136683	0.0288	2.896	147.279
ASP_512@OD2	LYS_513@H	LYS_513@N	136351	0.0287	2.8345	145.132
LYS_319@O	GLN_173@HE22	GLN_173@NE2	136313	0.0287	2.8506	161.285
PRO_85@O	ASN_88@HD22	ASN_88@ND2	136115	0.0287	2.8385	157.958
GLU_392@OE2	ARG_393@HE	ARG_393@NE	135993	0.0286	2.8121	157.739
GLU_295@OE2	ARG_296@H	ARG_296@N	135974	0.0286	2.847	146.287
ALA_266@O	GLN_271@HE21	GLN_271@NE2	135973	0.0286	2.8563	151.01
ASP_512@OD1	LYS_513@H	LYS_513@N	135897	0.0286	2.8334	145.181
ASN_436@OD1	ASN_347@HD21	ASN_347@ND2	135854	0.0286	2.8551	160.022
GLU_272@OE2	GLN_271@H	GLN_271@N	135659	0.0286	2.8542	163.029
GLU_311@OE1	ARG_268@HH12	ARG_268@NH1	135495	0.0285	2.8051	156.679
ASP_334@OD1	ARG_278@HH21	ARG_278@NH2	134923	0.0284	2.8251	155.298
ALA_263@O	ARG_268@HH22	ARG_268@NH2	134778	0.0284	2.7992	154.075
THR_25@O	SER_77@HG	SER_77@OG	134385	0.0283	2.7832	158.504
GLU_196@OE2	LYS_195@HZ3	LYS_195@NZ	134375	0.0283	2.7756	157.223
ALA_128@O	LEU_131@H	LEU_131@N	134373	0.0283	2.9046	146.599
LEU_136@O	SER_139@HG	SER_139@OG	134341	0.0283	2.762	156.931
GLN_339@O	ASP_342@H	ASP_342@N	134129	0.0282	2.897	150.168
ML1_259@O5	ARG_175@HH11	ARG_175@NH1	134062	0.0282	2.8706	156.055
GLU_391@OE2	SER_6@HG	SER_6@OG	133984	0.0282	2.6578	164.779
ASP_83@OD2	LYS_319@HZ3	LYS_319@NZ	133859	0.0282	2.7764	154.906
GLN_375@OE1	THR_418@HG1	THR_418@OG1	133593	0.0281	2.7105	158.534
GLN_183@O	SER_186@H	SER_186@N	133366	0.0281	2.9013	151.408
GLU_416@OE1	ARG_51@HH22	ARG_51@NH2	133219	0.028	2.7905	153.937
ASP_189@OD1	ARG_230@HH11	ARG_230@NH1	133155	0.028	2.7899	153.758
PRO_141@O	ARG_194@HH11	ARG_194@NH1	132808	0.028	2.8204	158.646
LEU_395@O	SER_398@HG	SER_398@OG	132773	0.028	2.7704	156.803
THR_5@O	TYR_500@HH	TYR_500@OH	132739	0.0279	2.7433	160.368
ALA_516@OXT	ARG_119@HE	ARG_119@NE	132483	0.0279	2.8406	156.341
SER_186@OG	GLY_142@H	GLY_142@N	132278	0.0278	2.8839	152.221
GLU_132@OE1	GLY_147@H	GLY_147@N	132055	0.0278	2.8562	159.591
ASN_335@O	GLN_339@H	GLN_339@N	131875	0.0278	2.8745	158.408
GLU_323@OE2	ARG_326@HE	ARG_326@NE	131604	0.0277	2.8328	155.033
ARG_385@O	LEU_388@H	LEU_388@N	131572	0.0277	2.9006	144.155
GLU_435@OE2	GLN_12@HE22	GLN_12@NE2	131365	0.0277	2.8159	160.912
VAL_255@O	ALA_257@H	ALA_257@N	131168	0.0276	2.8752	146.617
ALA_101@O	LEU_104@H	LEU_104@N	131082	0.0276	2.9126	145.504
LEU_105@O	ASN_108@H	ASN_108@N	130827	0.0275	2.9057	142.564
GLU_166@O	GLN_339@HE22	GLN_339@NE2	130441	0.0275	2.8742	155.252
GLU_394@OE1	ARG_9@HE	ARG_9@NE	130350	0.0274	2.8302	153.465
ILE_18@O	LEU_21@H	LEU_21@N	129973	0.0274	2.8835	143.746
GLU_435@OE1	TRP_431@HE1	TRP_431@NE1	129666	0.0273	2.8416	152.316
GLU_64@OE2	ARG_66@H	ARG_66@N	129574	0.0273	2.8662	159.561
HIE_444@ND1	TYR_504@HH	TYR_504@OH	129507	0.0273	2.8679	159.954
ASP_189@OD2	ARG_230@HH22	ARG_230@NH2	129223	0.0272	2.8007	151.749
ILE_318@O	SER_338@HG	SER_338@OG	128951	0.0271	2.7716	160.267
GLU_272@OE2	SER_143@HG	SER_143@OG	128935	0.0271	2.6803	163.124
SER_171@O	TRP_174@H	TRP_174@N	128893	0.0271	2.8982	149.019
GLN_432@OE1	GLN_429@HE21	GLN_429@NE2	128790	0.0271	2.85	152.793
GLU_356@OE1	GLY_353@H	GLY_353@N	128751	0.0271	2.8567	160.004
HIE_446@O	SER_450@H	SER_450@N	128651	0.0271	2.8821	148.992
PRO_438@O	GLN_442@HE22	GLN_442@NE2	128365	0.027	2.858	158.969
GLN_12@OE1	ARG_9@HE	ARG_9@NE	128340	0.027	2.8464	152.14
GLU_64@O	ARG_66@H	ARG_66@N	128253	0.027	2.8725	146.154
ASP_83@OD2	GLN_339@HE22	GLN_339@NE2	128229	0.027	2.8213	160.587
ASP_75@O	SER_79@HG	SER_79@OG	127910	0.0269	2.7393	161.844
ALA_516@O	ARG_119@HE	ARG_119@NE	127869	0.0269	2.8411	156.182
GLU_38@OE1	ARG_37@HH11	ARG_37@NH1	127734	0.0269	2.7953	158.04
THR_48@OG1	THR_46@HG1	THR_46@OG1	127680	0.0269	2.8218	157.363
ASP_20@OD1	ARG_19@HH21	ARG_19@NH2	127480	0.0268	2.8168	152.273
ASP_342@O	ASN_81@HD22	ASN_81@ND2	127324	0.0268	2.8634	157.675
GLY_94@O	GLU_97@H	GLU_97@N	127200	0.0268	2.8998	147.762
ILE_22@O	GLY_30@H	GLY_30@N	126929	0.0267	2.8823	159.659
ASP_448@OD2	SER_403@H	SER_403@N	126791	0.0267	2.8472	158.538
ARG_428@O	TRP_431@H	TRP_431@N	126735	0.0267	2.9082	144.924
GLU_38@OE2	ARG_37@HH11	ARG_37@NH1	126683	0.0267	2.7957	158.008
ASP_92@O	SER_421@HG	SER_421@OG	126629	0.0267	2.7502	160.993
SER_265@O	ARG_268@H	ARG_268@N	126580	0.0266	2.9109	158.585
LEU_188@O	ARG_230@HH21	ARG_230@NH2	126276	0.0266	2.8307	151.088
GLU_311@OE2	ARG_268@HH12	ARG_268@NH1	126195	0.0266	2.8068	156.491
SER_6@O	SER_402@H	SER_402@N	125887	0.0265	2.8617	158.654
GLU_323@OE1	ARG_326@HE	ARG_326@NE	125873	0.0265	2.8324	154.864
ASP_83@OD2	GLN_339@HE21	GLN_339@NE2	125861	0.0265	2.8196	157.275
GLU_404@OE1	GLU_404@H	GLU_404@N	125782	0.0265	2.8324	150.399
GLN_432@O	GLU_435@H	GLU_435@N	125714	0.0265	2.8907	149.205
GLN_267@O	SER_265@HG	SER_265@OG	125625	0.0264	2.7305	160.567
ASP_515@OD1	ARG_119@H	ARG_119@N	125583	0.0264	2.8569	159.958
GLU_233@O	VAL_237@H	VAL_237@N	124993	0.0263	2.8787	154.204
ASP_448@O	SER_398@HG	SER_398@OG	124939	0.0263	2.7518	156.239
TYR_331@O	ASN_335@HD21	ASN_335@ND2	124872	0.0263	2.869	155.455
GLU_135@OE2	ARG_194@HH22	ARG_194@NH2	124709	0.0263	2.7971	153.84
ALA_257@OXT	ARG_47@HH22	ARG_47@NH2	124531	0.0262	2.8113	154.744
GLY_289@O	ARG_291@HH11	ARG_291@NH1	124390	0.0262	2.8253	155.649
THR_5@OG1	GLU_404@H	GLU_404@N	123942	0.0261	2.9272	163.103
GLU_13@O	ALA_16@H	ALA_16@N	123932	0.0261	2.8892	142.923
ASP_83@OD2	ARG_428@HH12	ARG_428@NH1	123892	0.0261	2.8076	152.829
GLU_166@OE2	ASN_350@HD22	ASN_350@ND2	123754	0.0261	2.8244	160.071
ASP_83@OD1	GLY_337@H	GLY_337@N	123659	0.026	2.8725	158.781
ASP_189@OD1	ARG_230@HH21	ARG_230@NH2	123482	0.026	2.7779	158.218
ASP_83@OD1	ARG_428@HH12	ARG_428@NH1	123460	0.026	2.8066	152.941
ASN_81@O	ASN_340@HD22	ASN_340@ND2	123094	0.0259	2.8671	161.187
GLN_429@OE1	TRP_433@HE1	TRP_433@NE1	123009	0.0259	2.865	149.308
GLU_135@OE1	ARG_194@HH22	ARG_194@NH2	122921	0.0259	2.7972	153.907
ASP_86@OD1	SER_338@HG	SER_338@OG	122631	0.0258	2.6711	164.734
GLN_429@OE1	GLN_432@HE22	GLN_432@NE2	122475	0.0258	2.8445	155.613
GLU_455@OE1	ARG_489@HE	ARG_489@NE	122131	0.0257	2.8368	156.44
SER_265@OG	GLN_267@H	GLN_267@N	122053	0.0257	2.923	156.433
GLU_166@OE2	ARG_169@HH12	ARG_169@NH1	121956	0.0257	2.79	156.32
ASP_86@OD1	SER_79@HG	SER_79@OG	121666	0.0256	2.6585	163.981
PRO_179@O	GLN_271@HE21	GLN_271@NE2	121639	0.0256	2.8599	155.081
LYS_261@O	THR_341@HG1	THR_341@OG1	121565	0.0256	2.7317	160.265
GLN_222@O	GLN_222@HE22	GLN_222@NE2	121541	0.0256	2.8723	149.74
ASN_340@OD1	GLN_173@HE22	GLN_173@NE2	121540	0.0256	2.835	160.679
SER_144@O	ARG_175@HH22	ARG_175@NH2	121524	0.0256	2.8273	152.286
MET_163@O	GLU_166@H	GLU_166@N	121226	0.0255	2.8935	143.43
ASP_190@OD1	ARG_230@HH12	ARG_230@NH1	121030	0.0255	2.8105	159.301
GLU_416@OE2	ARG_51@HH12	ARG_51@NH1	120839	0.0254	2.8118	151.31
ASP_380@OD1	LYS_254@HZ2	LYS_254@NZ	120830	0.0254	2.7941	154.016
ASP_334@OD1	SER_336@HG	SER_336@OG	120704	0.0254	2.6655	163.938
ASP_380@OD1	LYS_254@HZ1	LYS_254@NZ	120454	0.0254	2.7936	154.104
ASP_342@OD2	GLN_432@HE21	GLN_432@NE2	120254	0.0253	2.8338	160.525
GLY_147@O	GLN_150@H	GLN_150@N	120107	0.0253	2.9019	152.719
ALA_387@O	GLN_8@HE21	GLN_8@NE2	119957	0.0253	2.8679	161.377
ASN_335@OD1	ARG_66@HH22	ARG_66@NH2	119862	0.0252	2.8136	153.292
ALA_263@O	SER_265@H	SER_265@N	119852	0.0252	2.8371	146.89
ASP_380@OD1	LYS_254@HZ3	LYS_254@NZ	119850	0.0252	2.7934	153.94
ASN_340@OD1	GLN_173@HE21	GLN_173@NE2	119320	0.0251	2.8547	159.032
GLU_145@OE1	ARG_175@HE	ARG_175@NE	119067	0.0251	2.8497	152.562
GLU_455@OE2	ARG_489@HE	ARG_489@NE	119020	0.0251	2.8375	156.587
LEU_115@O	LYS_211@HZ3	LYS_211@NZ	118987	0.025	2.8382	152.513
LEU_115@O	LYS_211@HZ2	LYS_211@NZ	118838	0.025	2.8379	152.634
GLN_481@O	GLN_481@HE22	GLN_481@NE2	118832	0.025	2.8672	149.923
ALA_257@OXT	ARG_47@HH12	ARG_47@NH1	118690	0.025	2.8127	155.836
GLU_145@OE2	HIE_185@HE2	HIE_185@NE2	118690	0.025	2.8313	154.764
ASP_342@OD2	SER_79@HG	SER_79@OG	118492	0.0249	2.6634	165.025
LEU_115@O	LYS_211@HZ1	LYS_211@NZ	118307	0.0249	2.8379	152.562
GLU_394@OE1	SER_397@HG	SER_397@OG	118236	0.0249	2.6981	162.997
ASN_177@O	ARG_278@HH22	ARG_278@NH2	118172	0.0249	2.829	152.988
ASN_340@O	SER_343@HG	SER_343@OG	117987	0.0248	2.7587	155.379
GLU_323@OE1	VAL_324@H	VAL_324@N	117973	0.0248	2.8211	148.553
VAL_65@O	LYS_254@HZ3	LYS_254@NZ	117965	0.0248	2.7994	155.732
ILE_314@O	GLU_317@H	GLU_317@N	117925	0.0248	2.9023	142.756
ASP_212@O	ALA_215@H	ALA_215@N	117797	0.0248	2.8889	142.516
GLN_12@OE1	ARG_9@HH21	ARG_9@NH2	117631	0.0248	2.8283	149.618
ASP_512@O	VAL_514@H	VAL_514@N	117601	0.0248	2.8612	147.934
PRO_344@O	TRP_433@HE1	TRP_433@NE1	117600	0.0248	2.854	153.155
GLU_176@OE2	GLN_173@HE21	GLN_173@NE2	117520	0.0247	2.829	158.949
SER_84@O	ASN_88@HD22	ASN_88@ND2	117396	0.0247	2.8389	158.132
ASN_76@O	ASN_335@HD22	ASN_335@ND2	117378	0.0247	2.8471	154.942
VAL_65@O	LYS_254@HZ2	LYS_254@NZ	117318	0.0247	2.7994	155.827
THR_341@O	ASN_81@HD22	ASN_81@ND2	117168	0.0247	2.8481	155.856
ASN_177@OD1	LYS_319@HZ2	LYS_319@NZ	117102	0.0247	2.8177	152.77
ASP_190@O	LEU_192@H	LEU_192@N	117092	0.0247	2.8376	146.485
ASP_515@OD2	ARG_473@HH21	ARG_473@NH2	116701	0.0246	2.8121	154.612
GLU_311@OE2	ARG_268@HH22	ARG_268@NH2	116626	0.0246	2.7994	157.6
ALA_257@O	ARG_47@HH12	ARG_47@NH1	116499	0.0245	2.8138	155.994
GLU_311@OE1	ARG_268@HH22	ARG_268@NH2	116315	0.0245	2.7977	157.608
ASN_335@OD1	GLN_339@H	GLN_339@N	116261	0.0245	2.8915	161.819
GLU_145@OE1	HIE_185@HE2	HIE_185@NE2	116254	0.0245	2.8293	154.827
GLN_8@OE1	GLN_8@H	GLN_8@N	116195	0.0245	2.8417	148.419
LYS_124@O	SER_265@HG	SER_265@OG	116073	0.0244	2.7912	161.568
GLN_432@O	GLN_432@HE22	GLN_432@NE2	116061	0.0244	2.8647	151.559
ASP_334@OD2	ARG_278@HE	ARG_278@NE	116022	0.0244	2.8112	159.993
GLN_127@O	GLN_130@H	GLN_130@N	115820	0.0244	2.8912	144.412
ASP_20@OD2	ARG_19@HH21	ARG_19@NH2	115748	0.0244	2.8182	151.816
ASP_86@OD2	SER_79@HG	SER_79@OG	115745	0.0244	2.6579	164.001
ASP_189@OD1	ARG_230@HH22	ARG_230@NH2	115575	0.0243	2.8031	151.619
GLU_392@OE2	ARG_453@HH21	ARG_453@NH2	115573	0.0243	2.7857	159.767
SER_265@OG	ARG_268@HH21	ARG_268@NH2	115495	0.0243	2.8706	155.337
ASP_83@OD1	ARG_278@HH22	ARG_278@NH2	115203	0.0243	2.7825	158.731
ASN_177@OD1	LYS_319@HZ3	LYS_319@NZ	115179	0.0242	2.8178	152.708
GLU_176@OE1	TRP_172@HE1	TRP_172@NE1	114678	0.0241	2.8433	152.802
ASP_190@OD2	SER_191@H	SER_191@N	114645	0.0241	2.8163	142.472
SER_3@OG	ARG_9@HH21	ARG_9@NH2	114609	0.0241	2.8297	154.041
ASP_515@OD1	ARG_473@HH21	ARG_473@NH2	114530	0.0241	2.8112	154.553
GLU_392@OE1	ARG_453@HH21	ARG_453@NH2	114502	0.0241	2.7842	159.954
ASP_449@OD2	LEU_451@H	LEU_451@N	114058	0.024	2.8955	163.222
LEU_192@O	LYS_195@H	LYS_195@N	113882	0.024	2.9067	158.824
SER_402@OG	SER_405@HG	SER_405@OG	113661	0.0239	2.784	161.444
GLU_356@OE2	GLY_353@H	GLY_353@N	113562	0.0239	2.8575	160.298
ASN_177@OD1	LYS_319@HZ1	LYS_319@NZ	113446	0.0239	2.8186	152.55
GLU_13@OE1	ARG_9@HH11	ARG_9@NH1	113445	0.0239	2.7897	158.097
ALA_266@O	THR_305@H	THR_305@N	113369	0.0239	2.8801	159.222
VAL_65@O	LYS_254@HZ1	LYS_254@NZ	113227	0.0238	2.7993	155.81
ASN_177@O	LYS_319@HZ2	LYS_319@NZ	113216	0.0238	2.8225	155.517
ASP_515@OD2	ARG_214@HH21	ARG_214@NH2	113067	0.0238	2.8039	157.38
LYS_470@O	ALA_472@H	ALA_472@N	112989	0.0238	2.8962	142.49
ASP_345@OD1	SER_77@HG	SER_77@OG	112975	0.0238	2.6775	162.464
GLU_64@OE1	VAL_65@H	VAL_65@N	112894	0.0238	2.8329	150.726
ILE_55@O	GLU_58@H	GLU_58@N	112820	0.0238	2.9049	142.85
GLY_327@O	GLY_329@H	GLY_329@N	112813	0.0238	2.8495	146.385
GLU_64@OE2	VAL_65@H	VAL_65@N	112725	0.0237	2.8275	150.483
GLU_435@OE1	ARG_19@HH21	ARG_19@NH2	112692	0.0237	2.8008	157.02
SER_144@OG	HIE_185@HE2	HIE_185@NE2	112648	0.0237	2.8795	152.999
ASP_190@OD1	ARG_230@HH22	ARG_230@NH2	112615	0.0237	2.8052	157.856
ILE_463@O	ALA_466@H	ALA_466@N	112281	0.0236	2.9062	143.051
ALA_257@O	ARG_47@HH22	ARG_47@NH2	112233	0.0236	2.8139	154.513
GLU_394@OE1	SER_6@HG	SER_6@OG	112189	0.0236	2.6703	163.135
ASP_20@O	THR_25@H	THR_25@N	111937	0.0236	2.8653	153.703
GLU_176@OE2	TRP_172@HE1	TRP_172@NE1	111918	0.0236	2.8447	152.856
LEU_104@O	ASN_108@H	ASN_108@N	111908	0.0236	2.9253	157.619
ASN_340@O	GLN_432@HE22	GLN_432@NE2	111771	0.0235	2.8485	161.114
GLU_404@OE2	SER_3@HG	SER_3@OG	111729	0.0235	2.6969	161.008
GLN_173@OE1	THR_341@H	THR_341@N	111510	0.0235	2.8892	160.979
ASN_76@OD1	GLY_78@H	GLY_78@N	111335	0.0234	2.8742	150.917
GLU_64@OE1	ARG_66@H	ARG_66@N	111159	0.0234	2.871	160.659
ML1_259@O3	ARG_230@HH12	ARG_230@NH1	110907	0.0233	2.873	154.126
GLU_176@OE2	ARG_175@HH11	ARG_175@NH1	110802	0.0233	2.7684	156.104
ASP_515@OD2	ARG_119@H	ARG_119@N	110777	0.0233	2.8578	159.547
ALA_399@O	SER_403@H	SER_403@N	110576	0.0233	2.8764	153.982
ASN_177@O	LYS_319@HZ1	LYS_319@NZ	110571	0.0233	2.8229	155.619
ASP_449@OD1	LEU_451@H	LEU_451@N	110275	0.0232	2.8951	163.193
GLU_435@OE1	GLN_12@HE22	GLN_12@NE2	110269	0.0232	2.8211	160.869
GLN_271@OE1	LYS_319@HZ2	LYS_319@NZ	110248	0.0232	2.803	153.329
ARG_268@O	GLN_183@HE22	GLN_183@NE2	110197	0.0232	2.8455	156.392
GLY_78@O	ASN_81@HD22	ASN_81@ND2	110099	0.0232	2.8565	155.632
GLN_271@OE1	LYS_319@HZ3	LYS_319@NZ	109855	0.0231	2.8027	153.291
ASN_177@O	LYS_319@HZ3	LYS_319@NZ	109727	0.0231	2.8235	155.475
ARG_194@O	TRP_197@H	TRP_197@N	109089	0.023	2.8885	145.27
ALA_117@O	LYS_211@HZ1	LYS_211@NZ	109084	0.023	2.8167	152.336
ASN_76@OD1	SER_338@HG	SER_338@OG	109054	0.023	2.7441	160.381
ALA_117@O	LYS_211@HZ3	LYS_211@NZ	109053	0.023	2.8176	152.339
ALA_117@O	LYS_211@HZ2	LYS_211@NZ	108953	0.0229	2.8174	152.391
GLU_176@OE1	GLN_173@HE21	GLN_173@NE2	108838	0.0229	2.8307	158.828
GLU_31@O	ARG_32@HH11	ARG_32@NH1	108829	0.0229	2.8311	158.594
SER_336@O	ASN_177@HD21	ASN_177@ND2	108822	0.0229	2.8566	157.85
GLN_271@OE1	LYS_319@HZ1	LYS_319@NZ	108777	0.0229	2.8035	153.2
ASP_448@O	LEU_451@H	LEU_451@N	108762	0.0229	2.9013	151.798
ALA_4@O	THR_5@HG1	THR_5@OG1	108679	0.0229	2.7483	157.898
ASN_340@OD1	GLN_170@HE21	GLN_170@NE2	108621	0.0229	2.845	157.522
ASP_75@OD2	ARG_19@HH21	ARG_19@NH2	108525	0.0228	2.8066	157.409
ASP_189@OD1	HIE_185@HE2	HIE_185@NE2	108498	0.0228	2.8504	151.112
ASP_459@OD1	ASN_485@HD21	ASN_485@ND2	108429	0.0228	2.8268	160.308
GLU_394@OE2	ARG_453@HH22	ARG_453@NH2	108366	0.0228	2.7932	155.425
SER_77@O	SER_79@H	SER_79@N	108285	0.0228	2.8838	145.928
GLU_166@OE1	ARG_169@HH12	ARG_169@NH1	108163	0.0228	2.8119	155.551
GLU_145@OE1	GLN_271@HE22	GLN_271@NE2	108145	0.0228	2.8225	158.479
ASN_88@OD1	CYS_90@H	CYS_90@N	108053	0.0227	2.8774	159.023
SER_343@O	ASN_81@HD21	ASN_81@ND2	107922	0.0227	2.8378	150.917
GLU_145@OE2	ARG_175@HE	ARG_175@NE	107694	0.0227	2.8505	152.981
THR_82@OG1	SER_336@HG	SER_336@OG	107334	0.0226	2.7911	158.851
GLU_132@OE2	GLY_147@H	GLY_147@N	107147	0.0226	2.8497	158.624
GLN_103@OE1	GLN_100@HE21	GLN_100@NE2	106602	0.0224	2.851	148.343
ASP_75@OD1	ARG_19@HH22	ARG_19@NH2	106541	0.0224	2.8025	160.323
GLU_196@OE1	ASN_226@HD21	ASN_226@ND2	106534	0.0224	2.8332	159.828
LYS_319@O	ASN_335@HD22	ASN_335@ND2	106432	0.0224	2.8391	157.507
GLU_13@OE2	ARG_9@HH11	ARG_9@NH1	106401	0.0224	2.7907	158.158
LEU_505@O	ASP_507@H	ASP_507@N	106381	0.0224	2.8328	147.579
LYS_513@O	TRP_509@HE1	TRP_509@NE1	106298	0.0224	2.8608	157.27
ASP_448@OD1	GLY_401@H	GLY_401@N	106223	0.0224	2.8464	153.675
TYR_241@OH	HIE_187@HE2	HIE_187@NE2	106085	0.0223	2.8934	154.135
ASP_190@OD1	SER_191@H	SER_191@N	106051	0.0223	2.8205	142.608
GLU_58@OE1	ARG_66@HH21	ARG_66@NH2	105968	0.0223	2.794	154.653
GLN_432@OE1	ASN_81@H	ASN_81@N	105797	0.0223	2.8528	156.596
GLU_323@OE2	VAL_324@H	VAL_324@N	105697	0.0223	2.8124	147.626
ASP_345@OD2	SER_77@HG	SER_77@OG	105662	0.0222	2.6836	162.505
LYS_254@O	GLN_375@HE21	GLN_375@NE2	105620	0.0222	2.8575	156.77
GLU_416@OE1	ARG_51@HH12	ARG_51@NH1	105474	0.0222	2.8129	151.241
GLU_394@OE1	SER_3@HG	SER_3@OG	105365	0.0222	2.6355	164.254
ASP_342@OD2	GLN_429@HE21	GLN_429@NE2	105347	0.0222	2.8379	154.313
ASN_226@OD1	TYR_193@HH	TYR_193@OH	105327	0.0222	2.7524	160.158
ASP_83@OD2	ARG_278@HH22	ARG_278@NH2	105091	0.0221	2.7846	158.871
ASP_334@O	ARG_67@H	ARG_67@N	104905	0.0221	2.8927	161.912
ASP_253@OD1	GLN_100@HE22	GLN_100@NE2	104898	0.0221	2.8212	162.565
GLU_435@OE2	ARG_19@HE	ARG_19@NE	104746	0.0221	2.8385	150.278
GLU_404@OE1	GLN_12@HE21	GLN_12@NE2	104660	0.022	2.8318	157.641
ASP_342@OD1	SER_79@HG	SER_79@OG	104572	0.022	2.6681	164.583
LYS_319@O	ASN_340@HD22	ASN_340@ND2	104565	0.022	2.8552	157.702
ARG_385@O	GLN_389@HE22	GLN_389@NE2	104535	0.022	2.8611	161.17
ASP_515@OD2	ARG_473@HE	ARG_473@NE	104522	0.022	2.8177	155.86
HIE_446@O	ASP_448@H	ASP_448@N	104325	0.022	2.8907	145.848
ASP_189@OD2	HIE_185@HE2	HIE_185@NE2	104316	0.022	2.8467	150.416
ASP_20@OD2	ARG_19@HE	ARG_19@NE	104263	0.022	2.8226	153.418
GLN_267@OE1	GLN_271@HE21	GLN_271@NE2	104254	0.0219	2.845	158.231
ASP_334@OD1	ARG_67@H	ARG_67@N	104192	0.0219	2.8496	162.403
GLU_317@OE2	ARG_326@HH22	ARG_326@NH2	104126	0.0219	2.8067	157.596
PRO_288@O	ARG_66@HH12	ARG_66@NH1	104091	0.0219	2.8284	151.055
GLN_386@OE1	GLN_389@HE22	GLN_389@NE2	104074	0.0219	2.8471	156.343
GLU_196@OE2	ASN_226@HD21	ASN_226@ND2	103560	0.0218	2.8335	159.915
ASP_20@OD1	ARG_19@HE	ARG_19@NE	103480	0.0218	2.827	152.754
GLU_394@OE1	ARG_453@HH22	ARG_453@NH2	103478	0.0218	2.79	155.463
GLN_429@OE1	ASN_340@HD21	ASN_340@ND2	103377	0.0218	2.8524	153.523
ASP_515@OD1	ARG_473@HE	ARG_473@NE	103362	0.0218	2.8181	155.78
THR_341@OG1	ASN_81@HD21	ASN_81@ND2	103349	0.0218	2.8787	155.529
ALA_93@O	SER_249@HG	SER_249@OG	103304	0.0217	2.7517	160.287
GLU_317@OE1	ARG_326@HH22	ARG_326@NH2	103268	0.0217	2.8064	157.442
HIE_187@ND1	TYR_245@HH	TYR_245@OH	103265	0.0217	2.8456	161.723
GLU_176@O	GLN_267@HE22	GLN_267@NE2	102750	0.0216	2.8549	149.671
ASN_108@OD1	ASN_367@HD21	ASN_367@ND2	102467	0.0216	2.8718	150.277
SER_403@OG	ARG_453@HE	ARG_453@NE	102344	0.0215	2.8531	153.224
ASN_367@OD1	ASN_108@HD21	ASN_108@ND2	102298	0.0215	2.8677	149.717
GLU_484@O	GLN_488@HE22	GLN_488@NE2	102267	0.0215	2.8618	158.901
SER_445@O	LYS_2@HZ3	LYS_2@NZ	102225	0.0215	2.8166	156.53
ASP_189@O	LEU_192@H	LEU_192@N	102190	0.0215	2.9076	162.491
SER_186@OG	SER_144@HG	SER_144@OG	102139	0.0215	2.787	160.271
ASP_256@OD2	LYS_228@HZ2	LYS_228@NZ	102047	0.0215	2.8068	151.895
ALA_516@O	LYS_476@HZ2	LYS_476@NZ	102036	0.0215	2.7787	158.123
GLU_166@O	GLN_429@HE21	GLN_429@NE2	101910	0.0215	2.8896	161.414
SER_445@OG	SER_403@HG	SER_403@OG	101839	0.0214	2.7827	160.645
ALA_263@O	ALA_266@H	ALA_266@N	101725	0.0214	2.896	151.391
GLN_359@OE1	HIE_160@HE2	HIE_160@NE2	101693	0.0214	2.8399	154.761
GLU_356@OE1	SER_508@HG	SER_508@OG	101462	0.0214	2.6635	164.278
GLU_379@OE1	ARG_378@HH22	ARG_378@NH2	101365	0.0213	2.8094	153.787
GLU_176@OE1	LYS_261@H	LYS_261@N	101313	0.0213	2.826	156.917
ASN_88@OD1	ASN_91@H	ASN_91@N	101244	0.0213	2.869	159.014
SER_146@OG	ALA_263@H	ALA_263@N	100859	0.0212	2.8924	154.802
ALA_516@O	LYS_476@HZ3	LYS_476@NZ	100727	0.0212	2.7786	158.054
ASP_75@OD2	ARG_19@HH12	ARG_19@NH1	100546	0.0212	2.8068	161.015
ASP_256@OD2	LYS_228@HZ3	LYS_228@NZ	100476	0.0212	2.8056	151.745
GLU_272@OE1	GLN_271@H	GLN_271@N	100362	0.0211	2.8551	162.742
GLU_300@OE1	ARG_296@HH11	ARG_296@NH1	100252	0.0211	2.8075	157.37
ALA_516@O	LYS_476@HZ1	LYS_476@NZ	100232	0.0211	2.7786	157.981
GLU_356@OE2	SER_508@HG	SER_508@OG	100151	0.0211	2.6652	164.041
GLN_8@OE1	THR_46@HG1	THR_46@OG1	100064	0.0211	2.76	161.376
GLU_64@OE2	SER_77@HG	SER_77@OG	100025	0.0211	2.6876	164.342
TYR_500@O	PHE_506@H	PHE_506@N	99992	0.0211	2.8703	161.329
ASN_335@OD1	SER_336@HG	SER_336@OG	99725	0.021	2.7671	162.413
TRP_456@O	ASP_459@H	ASP_459@N	99644	0.021	2.9022	143.234
ASN_91@O	SER_421@HG	SER_421@OG	99516	0.021	2.731	159.038
PRO_269@O	GLN_183@HE21	GLN_183@NE2	99453	0.0209	2.8633	154.038
SER_3@OG	THR_5@HG1	THR_5@OG1	99404	0.0209	2.8493	152.128
GLU_394@OE2	SER_397@HG	SER_397@OG	99387	0.0209	2.7011	163.083
SER_191@O	ARG_194@H	ARG_194@N	99382	0.0209	2.9091	154.344
GLU_300@OE2	ARG_296@HH11	ARG_296@NH1	99174	0.0209	2.8074	157.283
SER_445@O	LYS_2@HZ1	LYS_2@NZ	99048	0.0209	2.8162	156.457
ASP_342@OD1	GLN_429@HE21	GLN_429@NE2	98962	0.0208	2.8397	154.805
ASP_256@O	HIE_419@HE2	HIE_419@NE2	98888	0.0208	2.848	152.834
GLU_379@OE2	ARG_378@HH22	ARG_378@NH2	98487	0.0207	2.8096	153.91
PRO_288@O	ARG_66@HH22	ARG_66@NH2	98448	0.0207	2.827	150.966
GLU_31@OE2	ARG_32@HE	ARG_32@NE	97962	0.0206	2.8237	156.275
ARG_126@O	LEU_129@H	LEU_129@N	97702	0.0206	2.9025	144.292
ASP_256@OD2	LYS_228@HZ1	LYS_228@NZ	97675	0.0206	2.805	151.574
GLU_31@OE1	ARG_325@HH22	ARG_325@NH2	97597	0.0205	2.7947	157.721
ASP_515@OD2	ARG_214@HH22	ARG_214@NH2	97557	0.0205	2.8102	156.38
GLU_58@OE2	LYS_254@HZ1	LYS_254@NZ	97427	0.0205	2.8159	153.73
GLU_58@OE1	LYS_254@HZ2	LYS_254@NZ	97332	0.0205	2.8165	153.701
GLU_370@OE2	ARG_473@HH21	ARG_473@NH2	97300	0.0205	2.8016	156.712
ASN_226@OD1	ARG_230@HE	ARG_230@NE	97214	0.0205	2.828	155.482
GLU_58@OE2	ARG_66@HH21	ARG_66@NH2	97009	0.0204	2.7967	154.775
LEU_390@O	SER_402@H	SER_402@N	96971	0.0204	2.8771	155.035
GLU_31@OE1	ARG_32@HE	ARG_32@NE	96886	0.0204	2.8233	156.506
GLU_157@O	LYS_513@HZ2	LYS_513@NZ	96860	0.0204	2.8204	152.035
ALA_387@O	LEU_390@H	LEU_390@N	96829	0.0204	2.9163	153.016
GLU_435@OE2	ARG_19@HH21	ARG_19@NH2	96762	0.0204	2.8008	157.071
GLU_64@OE1	ARG_67@HH21	ARG_67@NH2	96745	0.0204	2.8034	153.892
ALA_263@O	THR_264@HG1	THR_264@OG1	96521	0.0203	2.7577	157.338
GLN_442@OE1	TYR_500@HH	TYR_500@OH	96346	0.0203	2.7447	162.353
SER_445@O	LYS_2@HZ2	LYS_2@NZ	96279	0.0203	2.8174	156.421
LEU_490@O	TYR_500@HH	TYR_500@OH	96024	0.0202	2.756	160.49
ASP_471@OD1	LYS_469@HZ3	LYS_469@NZ	95995	0.0202	2.7962	158.613
TRP_250@O	ASN_91@HD22	ASN_91@ND2	95991	0.0202	2.8402	159.79
GLU_58@OE2	LYS_254@HZ2	LYS_254@NZ	95940	0.0202	2.8184	153.611
THR_307@OG1	THR_305@HG1	THR_305@OG1	95755	0.0202	2.8239	157.637
GLN_100@OE1	HIE_419@HE2	HIE_419@NE2	95753	0.0202	2.8374	154.309
ASP_200@O	GLN_203@H	GLN_203@N	95724	0.0202	2.8875	141.424
ASP_471@OD2	LYS_469@HZ3	LYS_469@NZ	95541	0.0201	2.7966	158.56
GLN_80@OE1	ARG_428@HH11	ARG_428@NH1	95517	0.0201	2.8242	159.512
ARG_268@O	GLN_271@H	GLN_271@N	95455	0.0201	2.8978	155.534
ASP_248@O	SER_249@HG	SER_249@OG	95347	0.0201	2.6863	158.899
GLN_130@O	GLN_130@HE22	GLN_130@NE2	95312	0.0201	2.8569	152.579
ASP_243@OD2	LYS_261@H	LYS_261@N	95128	0.02	2.839	157.213
ASP_342@OD2	THR_341@HG1	THR_341@OG1	95064	0.02	2.7196	162.712
LEU_252@O	GLN_100@HE21	GLN_100@NE2	95016	0.02	2.8586	154.338
SER_403@O	GLY_406@H	GLY_406@N	94835	0.02	2.8958	147.536
GLU_157@O	LYS_513@HZ1	LYS_513@NZ	94760	0.0199	2.8202	151.951
VAL_14@O	MET_17@H	MET_17@N	94730	0.0199	2.8909	142.389
ASP_471@OD1	LYS_469@HZ2	LYS_469@NZ	94683	0.0199	2.7961	158.595
LEU_333@O	TYR_286@HH	TYR_286@OH	94654	0.0199	2.7657	161.288
GLU_157@O	LYS_513@HZ3	LYS_513@NZ	94597	0.0199	2.821	151.839
ASP_471@OD2	LYS_469@HZ1	LYS_469@NZ	94551	0.0199	2.7959	158.644
GLN_429@O	GLN_432@H	GLN_432@N	94424	0.0199	2.8982	145.785
GLU_176@O	ARG_278@HH22	ARG_278@NH2	94397	0.0199	2.8433	150.321
GLY_503@O	LEU_505@H	LEU_505@N	94369	0.0199	2.8695	146.582
SER_144@O	ARG_175@HH12	ARG_175@NH1	94351	0.0199	2.8172	155.675
ARG_169@O	TRP_172@H	TRP_172@N	94335	0.0199	2.9041	144.067
GLU_145@OE2	SER_144@HG	SER_144@OG	94289	0.0199	2.671	164.212
PRO_285@O	ASN_287@HD22	ASN_287@ND2	94230	0.0198	2.8615	156.476
GLU_58@OE1	LYS_254@HZ1	LYS_254@NZ	94135	0.0198	2.8165	153.486
GLU_176@OE2	LYS_261@H	LYS_261@N	94002	0.0198	2.8232	156.177
ASP_471@OD2	LYS_469@HZ2	LYS_469@NZ	93991	0.0198	2.7958	158.588
ASP_75@OD1	ARG_19@HE	ARG_19@NE	93989	0.0198	2.8303	158.708
GLU_58@OE1	ARG_66@HE	ARG_66@NE	93987	0.0198	2.8307	155.03
THR_341@OG1	SER_77@HG	SER_77@OG	93846	0.0198	2.7714	163.469
GLU_58@OE2	LYS_254@HZ3	LYS_254@NZ	93784	0.0197	2.8165	153.696
THR_82@O	GLN_339@H	GLN_339@N	93766	0.0197	2.853	156.885
GLU_135@OE2	ARG_194@HH12	ARG_194@NH1	93613	0.0197	2.8048	153.196
GLY_61@O	GLN_80@HE21	GLN_80@NE2	93537	0.0197	2.8517	155.222
SER_398@O	TYR_11@HH	TYR_11@OH	93289	0.0196	2.7398	160.156
ASP_471@OD1	LYS_469@HZ1	LYS_469@NZ	93166	0.0196	2.7958	158.599
ASP_497@OD1	HIE_446@HE2	HIE_446@NE2	93068	0.0196	2.8136	156.476
ALA_7@O	GLN_442@HE21	GLN_442@NE2	93023	0.0196	2.8511	157.485
GLU_272@OE1	GLN_183@HE21	GLN_183@NE2	93004	0.0196	2.8309	160.931
TYR_500@O	SER_494@HG	SER_494@OG	92757	0.0195	2.7512	162.188
ASP_75@OD2	ASN_76@HD22	ASN_76@ND2	92731	0.0195	2.8255	159.433
SER_143@O	ARG_194@HH22	ARG_194@NH2	92709	0.0195	2.8335	155.762
GLU_272@OE2	GLN_183@HE21	GLN_183@NE2	92621	0.0195	2.8305	161.014
LEU_232@O	SER_235@H	SER_235@N	92616	0.0195	2.9104	147.736
GLU_356@OE1	ASN_161@HD22	ASN_161@ND2	92602	0.0195	2.8086	156.063
SER_397@O	SER_398@HG	SER_398@OG	92570	0.0195	2.7363	156.168
PRO_510@O	ASP_512@H	ASP_512@N	92533	0.0195	2.8739	146.341
GLU_435@OE1	ARG_19@HE	ARG_19@NE	92468	0.0195	2.8421	150.687
LEU_302@O	VAL_304@H	VAL_304@N	92269	0.0194	2.8509	145.176
GLN_183@OE1	TYR_270@HH	TYR_270@OH	92181	0.0194	2.7381	161.275
ASP_459@O	GLN_462@H	GLN_462@N	91932	0.0194	2.8897	141.375
GLU_176@OE1	GLN_267@HE21	GLN_267@NE2	91913	0.0194	2.8366	158.375
GLU_176@OE2	GLN_267@HE21	GLN_267@NE2	91900	0.0193	2.8368	158.496
SER_6@OG	GLN_8@HE22	GLN_8@NE2	91870	0.0193	2.8805	160.284
GLN_8@OE1	ARG_9@H	ARG_9@N	91811	0.0193	2.8696	154.503
GLU_370@OE1	ARG_473@HH21	ARG_473@NH2	91800	0.0193	2.8014	156.77
GLU_404@OE2	SER_402@HG	SER_402@OG	91764	0.0193	2.6629	160.511
ASP_515@OD1	ARG_214@HH22	ARG_214@NH2	91654	0.0193	2.8119	156.321
ASP_497@O	ASN_495@HD21	ASN_495@ND2	91425	0.0192	2.8412	155.464
GLU_58@OE2	ARG_66@HE	ARG_66@NE	91420	0.0192	2.8323	155.475
GLU_13@OE2	SER_405@HG	SER_405@OG	91323	0.0192	2.662	163.243
ASP_334@O	ASN_81@HD21	ASN_81@ND2	91189	0.0192	2.8341	158.191
GLU_58@OE1	LYS_254@HZ3	LYS_254@NZ	91179	0.0192	2.8176	153.663
ASN_347@OD1	TRP_433@HE1	TRP_433@NE1	91174	0.0192	2.8674	149.065
GLN_173@OE1	GLN_339@HE21	GLN_339@NE2	91170	0.0192	2.8424	160.872
GLU_31@OE2	ARG_325@HH22	ARG_325@NH2	91038	0.0192	2.7972	157.439
LEU_395@O	SER_402@HG	SER_402@OG	90906	0.0191	2.7771	159.806
GLU_145@OE2	ML1_259@H7	ML1_259@O3	90865	0.0191	2.7725	162.477
SER_6@O	THR_46@HG1	THR_46@OG1	90772	0.0191	2.739	155.696
SER_262@OG	SER_265@H	SER_265@N	90716	0.0191	2.9121	155.255
ASP_75@OD1	ASN_76@HD22	ASN_76@ND2	90507	0.0191	2.8265	159.39
ASP_497@OD2	ILE_499@H	ILE_499@N	90164	0.019	2.8971	161.877
MET_125@O	ALA_128@H	ALA_128@N	90127	0.019	2.9008	143.08
ASP_497@OD1	ILE_499@H	ILE_499@N	90049	0.019	2.8957	161.451
ASN_485@O	TRP_456@HE1	TRP_456@NE1	89877	0.0189	2.8878	159.454
GLU_135@OE1	ARG_194@HH12	ARG_194@NH1	89623	0.0189	2.8051	153.227
HD1_411@O	ILE_414@H	ILE_414@N	89489	0.0188	2.918	143.945
GLU_31@OE2	ARG_325@HH12	ARG_325@NH1	89462	0.0188	2.8177	158.611
GLU_31@OE2	ARG_32@HH21	ARG_32@NH2	89461	0.0188	2.816	154.002
ASN_340@O	SER_343@H	SER_343@N	89014	0.0187	2.9049	151.903
VAL_486@O	ARG_489@H	ARG_489@N	88955	0.0187	2.8977	144.728
GLN_339@O	GLN_170@HE21	GLN_170@NE2	88761	0.0187	2.8632	157.943
ASP_515@O	ARG_214@HH22	ARG_214@NH2	88642	0.0187	2.8203	150.792
LEU_451@O	LYS_454@H	LYS_454@N	88605	0.0187	2.8931	151.25
PRO_141@O	SER_143@HG	SER_143@OG	88443	0.0186	2.7584	163.798
THR_341@O	ASP_345@H	ASP_345@N	88145	0.0186	2.9013	157.37
ASN_437@OD1	ARG_19@HE	ARG_19@NE	88106	0.0185	2.8942	148.463
GLU_394@OE2	SER_405@HG	SER_405@OG	87955	0.0185	2.6789	163.359
ALA_516@OXT	ARG_119@HH22	ARG_119@NH2	87848	0.0185	2.8078	155.721
SER_338@OG	ASN_335@HD21	ASN_335@ND2	87756	0.0185	2.8725	154.827
GLU_135@O	SER_139@HG	SER_139@OG	87548	0.0184	2.7308	160.237
ASN_347@O	ASN_350@HD22	ASN_350@ND2	87541	0.0184	2.846	158.082
LYS_60@O	GLN_80@HE21	GLN_80@NE2	87387	0.0184	2.8547	158.975
GLN_8@OE1	GLN_442@HE22	GLN_442@NE2	87251	0.0184	2.8446	162.068
HIE_446@ND1	LEU_447@H	LEU_447@N	87244	0.0184	2.9093	156.072
GLU_13@O	GLN_442@HE21	GLN_442@NE2	87238	0.0184	2.8717	156.911
GLU_64@OE2	ARG_67@HH21	ARG_67@NH2	87203	0.0184	2.8043	154.427
GLN_173@OE1	GLN_170@HE21	GLN_170@NE2	87164	0.0184	2.8509	154.047
ASP_515@OD2	ARG_214@HH12	ARG_214@NH1	86637	0.0182	2.8048	157.032
GLU_455@OE2	LYS_454@HZ1	LYS_454@NZ	86416	0.0182	2.7766	157.013
GLU_394@OE1	THR_5@H	THR_5@N	86214	0.0182	2.8419	158.217
ASP_279@O	ILE_282@H	ILE_282@N	86068	0.0181	2.9008	146.184
GLU_145@OE1	LYS_319@HZ2	LYS_319@NZ	85978	0.0181	2.7715	157.93
LEU_153@O	ALA_156@H	ALA_156@N	85953	0.0181	2.8915	141.529
ALA_516@O	ARG_119@HH22	ARG_119@NH2	85917	0.0181	2.8082	155.697
GLU_64@OE1	ARG_67@HE	ARG_67@NE	85882	0.0181	2.8295	155.01
ASN_335@OD1	SER_336@H	SER_336@N	85834	0.0181	2.853	146.066
GLN_339@OE1	THR_341@HG1	THR_341@OG1	85795	0.0181	2.7352	159.539
ASP_515@OD1	ARG_214@HH21	ARG_214@NH2	85732	0.018	2.8084	156.711
ASP_212@OD2	LYS_210@HZ1	LYS_210@NZ	85710	0.018	2.798	158.321
SER_146@O	MET_149@H	MET_149@N	85267	0.018	2.9028	155.986
GLU_455@OE2	LYS_454@HZ2	LYS_454@NZ	85045	0.0179	2.7764	157.035
LEU_43@O	VAL_45@H	VAL_45@N	84943	0.0179	2.842	144.167
GLN_362@OE1	GLN_359@HE21	GLN_359@NE2	84852	0.0179	2.8482	149.065
GLU_404@OE2	ARG_434@HH11	ARG_434@NH1	84721	0.0178	2.7984	153.462
ASP_212@OD2	LYS_210@HZ2	LYS_210@NZ	84711	0.0178	2.7974	158.238
ASN_177@O	ASN_177@HD22	ASN_177@ND2	84602	0.0178	2.81	150.515
TYR_270@O	VAL_273@H	VAL_273@N	84522	0.0178	2.8977	144.507
SER_6@OG	GLN_442@HE22	GLN_442@NE2	84509	0.0178	2.8855	160.438
GLU_64@OE2	ASP_75@H	ASP_75@N	84453	0.0178	2.8715	162.039
GLU_394@OE2	SER_3@HG	SER_3@OG	84427	0.0178	2.6428	163.718
GLU_455@OE1	LYS_454@HZ2	LYS_454@NZ	84417	0.0178	2.7765	157.06
ASN_91@OD1	SER_421@HG	SER_421@OG	84333	0.0178	2.7209	160.39
GLU_404@OE1	SER_402@HG	SER_402@OG	84185	0.0177	2.662	160.537
ASP_497@OD2	HIE_446@HE2	HIE_446@NE2	84176	0.0177	2.8142	156.508
GLU_455@OE1	LYS_454@HZ1	LYS_454@NZ	84073	0.0177	2.7779	157.114
[truncated: 18,980 more rows]

## Sheet: UxuR in complex with GlcnA
#Acceptor	DonorH	Donor	Frames	Frac	AvgDist	AvgAng
GLN_362@O	SER_366@HG	SER_366@OG	4376436	0.9214	2.696	161.788
GLN_103@O	SER_107@HG	SER_107@OG	4344583	0.9146	2.7056	161.982
ML1_259@O7	ARG_102@HH12	ARG_102@NH1	4254369	0.8957	2.7942	161.76
LEU_21@O	THR_25@HG1	THR_25@OG1	4031905	0.8488	2.7373	162.829
AP1_148@O	HD1_152@H	HD1_152@N	4010507	0.8443	2.8382	166.32
AP1_407@O	HD1_411@H	HD1_411@N	4009608	0.8441	2.8466	166.228
LEU_363@O	ASN_367@HD22	ASN_367@ND2	3998222	0.8417	2.8132	161.587
LEU_280@O	THR_284@HG1	THR_284@OG1	3969096	0.8356	2.7401	162.495
LEU_104@O	ASN_108@HD22	ASN_108@ND2	3953883	0.8324	2.8179	161.481
ARG_102@O	GLU_106@H	GLU_106@N	3943975	0.8303	2.8252	154.924
LEU_153@O	GLU_157@H	GLU_157@N	3890958	0.8191	2.8508	164.409
ALA_156@O	THR_159@HG1	THR_159@OG1	3888656	0.8187	2.7506	163.951
ARG_361@O	GLU_365@H	GLU_365@N	3882002	0.8173	2.8296	155.664
LEU_412@O	GLU_416@H	GLU_416@N	3825764	0.8054	2.8531	164.248
ALA_415@O	THR_418@HG1	THR_418@OG1	3702079	0.7794	2.7407	163.675
LEU_477@O	GLN_481@H	GLN_481@N	3666746	0.7719	2.8525	161.388
LEU_218@O	GLN_222@H	GLN_222@N	3645058	0.7674	2.8532	160.96
ILE_109@O	ALA_113@H	ALA_113@N	3607913	0.7596	2.8507	160.694
ILE_71@O	LEU_33@H	LEU_33@N	3596902	0.7572	2.8471	161.64
ILE_368@O	ALA_372@H	ALA_372@N	3572455	0.7521	2.8524	160.514
ILE_330@O	LEU_292@H	LEU_292@N	3556958	0.7488	2.8476	161.052
VAL_424@O	ARG_428@H	ARG_428@N	3549248	0.7472	2.8483	158.643
LEU_98@O	ARG_102@H	ARG_102@N	3534048	0.744	2.8597	161.262
LEU_357@O	ARG_361@H	ARG_361@N	3444187	0.7251	2.8619	161.468
LEU_358@O	GLN_362@H	GLN_362@N	3402954	0.7164	2.8485	155.619
ASP_459@O	ILE_463@H	ILE_463@N	3318254	0.6986	2.86	161.108
ALA_215@O	ALA_219@H	ALA_219@N	3296967	0.6941	2.8604	161.612
ASP_200@O	ILE_204@H	ILE_204@N	3293587	0.6934	2.8623	161.092
LEU_99@O	GLN_103@H	GLN_103@N	3291949	0.693	2.8542	156.006
TYR_72@O	GLU_64@H	GLU_64@N	3281997	0.6909	2.8601	158.215
VAL_165@O	ARG_169@H	ARG_169@N	3274099	0.6893	2.8524	157.237
ALA_474@O	ALA_478@H	ALA_478@N	3219529	0.6778	2.8616	161.744
LEU_490@O	SER_494@HG	SER_494@OG	3173528	0.6681	2.754	162.585
LYS_476@O	TRP_480@H	TRP_480@N	3158768	0.665	2.8707	159.996
GLU_484@O	GLN_488@H	GLN_488@N	3106898	0.6541	2.8647	162.432
GLU_225@O	GLN_229@H	GLN_229@N	3093215	0.6512	2.8661	162.614
ILE_122@O	ARG_126@H	ARG_126@N	3079153	0.6482	2.8694	160.32
PHE_427@O	TRP_431@H	TRP_431@N	3066939	0.6457	2.8584	158.847
LYS_217@O	TRP_221@H	TRP_221@N	3053256	0.6428	2.8756	160.456
TRP_174@O	ASN_178@HD22	ASN_178@ND2	3051163	0.6423	2.8364	157.669
GLU_106@O	ALA_110@H	ALA_110@N	3050291	0.6422	2.8728	159.208
GLN_222@O	ASN_226@H	ASN_226@N	3041953	0.6404	2.8591	157.324
LEU_316@O	LEU_321@H	LEU_321@N	3025375	0.6369	2.8607	156.63
LEU_231@O	SER_235@HG	SER_235@OG	3021535	0.6361	2.7596	162.842
MET_408@O	LEU_412@H	LEU_412@N	3009969	0.6337	2.8494	157.906
LEU_464@O	ILE_468@H	ILE_468@N	3009878	0.6337	2.8747	159.536
VAL_309@O	LEU_313@H	LEU_313@N	3004688	0.6326	2.8754	158.325
GLN_173@O	ASN_177@H	ASN_177@N	3001484	0.6319	2.8608	158.078
LEU_205@O	ILE_209@H	ILE_209@N	3000239	0.6316	2.8751	159.423
VAL_382@O	GLN_386@H	GLN_386@N	2999173	0.6314	2.8674	160.935
ILE_381@O	ARG_385@H	ARG_385@N	2981880	0.6278	2.8716	159.936
VAL_123@O	GLN_127@H	GLN_127@N	2953823	0.6219	2.8683	161.161
ARG_489@O	PHE_493@H	PHE_493@N	2952392	0.6216	2.8632	161.021
VAL_50@O	LEU_54@H	LEU_54@N	2939343	0.6188	2.8769	158.327
GLU_356@O	ASN_161@HD21	ASN_161@ND2	2935102	0.6179	2.8588	157.668
LEU_57@O	LEU_62@H	LEU_62@N	2921450	0.615	2.8685	156.527
ARG_47@O	ARG_51@H	ARG_51@N	2919637	0.6147	2.8686	160.196
PHE_355@O	GLN_359@H	GLN_359@N	2919180	0.6146	2.8712	157.819
ALA_372@O	ALA_376@H	ALA_376@N	2911632	0.613	2.8605	156.395
ILE_182@O	SER_186@HG	SER_186@OG	2909372	0.6125	2.736	162.402
TYR_241@O	TYR_245@H	TYR_245@N	2888722	0.6082	2.8655	159.813
ML1_518@O7	ARG_361@HH12	ARG_361@NH1	2872959	0.6048	2.7871	161.056
ARG_306@O	ARG_310@H	ARG_310@N	2863037	0.6027	2.8691	160.235
GLN_481@O	ASN_485@H	ASN_485@N	2815008	0.5926	2.861	156.701
GLN_116@OE1	HIE_160@H	HIE_160@N	2813995	0.5924	2.8455	159.711
ALA_113@O	ALA_117@H	ALA_117@N	2810174	0.5916	2.8624	156.205
ASP_212@O	ALA_216@H	ALA_216@N	2776365	0.5845	2.8827	160.978
TYR_331@O	GLU_323@H	GLU_323@N	2750476	0.579	2.8686	158.681
GLU_64@O	TYR_72@H	TYR_72@N	2729057	0.5745	2.8678	160.937
ARG_230@O	PHE_234@H	PHE_234@N	2722372	0.5731	2.8709	161.501
ML1_518@O7	ML1_518@H7	ML1_518@O3	2697428	0.5679	2.7218	144.732
ASP_121@O	MET_125@H	MET_125@N	2697049	0.5678	2.8765	159.577
ALA_312@O	LEU_316@H	LEU_316@N	2674815	0.5631	2.8759	160.579
TYR_11@O	GLY_15@H	GLY_15@N	2672240	0.5626	2.853	152.713
ASP_471@O	ALA_475@H	ALA_475@N	2671038	0.5623	2.8839	161.056
PHE_96@O	GLN_100@H	GLN_100@N	2654991	0.5589	2.8784	158.027
ASP_380@O	MET_384@H	MET_384@N	2629512	0.5536	2.8785	159.475
TYR_270@O	GLY_274@H	GLY_274@N	2626842	0.553	2.8526	151.903
ALA_53@O	LEU_57@H	LEU_57@N	2611695	0.5498	2.876	159.438
VAL_14@O	ILE_18@H	ILE_18@N	2609480	0.5494	2.8778	156.914
VAL_273@O	ILE_277@H	ILE_277@N	2603938	0.5482	2.8768	157.425
GLU_365@O	ALA_369@H	ALA_369@N	2599078	0.5472	2.883	158.406
ALA_275@O	ASP_279@H	ASP_279@N	2593493	0.546	2.8744	159.23
GLN_375@OE1	HIE_419@H	HIE_419@N	2591709	0.5456	2.8429	159.709
GLY_274@O	ARG_278@H	ARG_278@N	2587608	0.5448	2.8729	159.403
GLU_36@O	ALA_40@H	ALA_40@N	2582033	0.5436	2.8755	160.15
MET_149@O	LEU_153@H	LEU_153@N	2564348	0.5399	2.851	156.375
GLY_15@O	ARG_19@H	ARG_19@N	2558621	0.5387	2.871	158.965
GLU_97@O	ASN_420@HD21	ASN_420@ND2	2551053	0.5371	2.8581	159.314
ML1_259@O7	ML1_259@H7	ML1_259@O3	2541239	0.535	2.7181	144.785
ALA_16@O	ASP_20@H	ASP_20@N	2534139	0.5335	2.8755	159.846
GLU_295@O	ALA_299@H	ALA_299@N	2515388	0.5296	2.8781	160.164
AP1_148@OD1	ARG_175@HH22	ARG_175@NH2	2511930	0.5288	2.8158	150.358
LEU_198@O	LYS_202@H	LYS_202@N	2511090	0.5286	2.8809	158.395
LYS_202@O	ALA_206@H	ALA_206@N	2507489	0.5279	2.8786	158.513
LEU_224@O	LYS_228@H	LYS_228@N	2476112	0.5213	2.8831	161.975
GLU_323@O	TYR_331@H	TYR_331@N	2439709	0.5136	2.8577	160.865
MET_56@O	LYS_60@H	LYS_60@N	2434480	0.5125	2.8772	159.395
GLU_425@OE2	ARG_428@HH21	ARG_428@NH2	2432974	0.5122	2.7808	159.227
MET_163@O	LEU_167@H	LEU_167@N	2419743	0.5094	2.8749	156.309
ASP_121@OD1	THR_118@HG1	THR_118@OG1	2414580	0.5083	2.7052	162.419
GLU_365@OE1	ARG_361@HE	ARG_361@NE	2399829	0.5052	2.8219	158.727
LYS_461@O	ALA_465@H	ALA_465@N	2391419	0.5035	2.8802	158.445
HD2_460@O	LEU_464@H	LEU_464@N	2372008	0.4994	2.8941	162.44
GLU_365@OE2	ARG_361@HH21	ARG_361@NH2	2371980	0.4994	2.828	157.062
ARG_453@O	LEU_457@H	LEU_457@N	2364395	0.4978	2.8733	157.582
TYR_452@O	TRP_456@H	TRP_456@N	2361322	0.4971	2.8729	161.306
ALA_466@O	ASP_471@H	ASP_471@N	2356487	0.4961	2.8767	159.273
PHE_168@O	TRP_172@H	TRP_172@N	2351477	0.495	2.8676	158.026
VAL_308@O	ALA_312@H	ALA_312@N	2348542	0.4944	2.8821	156.84
VAL_49@O	ALA_53@H	ALA_53@N	2347102	0.4941	2.8837	157.132
MET_315@O	LYS_319@H	LYS_319@N	2334096	0.4914	2.8793	159.333
ILE_182@O	SER_186@H	SER_186@N	2326588	0.4898	2.8627	154.546
ALA_207@O	ASP_212@H	ASP_212@N	2324095	0.4893	2.8791	159.187
ARG_194@O	LEU_198@H	LEU_198@N	2317725	0.4879	2.8779	157.009
ARG_169@O	GLN_173@H	GLN_173@N	2311115	0.4866	2.8686	157.322
TYR_500@O	TYR_504@H	TYR_504@N	2309478	0.4862	2.868	160.064
ARG_428@O	GLN_432@H	GLN_432@N	2290021	0.4821	2.8698	155.621
ILE_277@O	ILE_281@H	ILE_281@N	2270933	0.4781	2.8851	157.469
AP1_407@OD1	ARG_434@HH22	ARG_434@NH2	2258431	0.4755	2.8225	150.809
PRO_179@O	GLN_183@H	GLN_183@N	2254551	0.4746	2.8773	159.896
ILE_18@O	ILE_22@H	ILE_22@N	2236107	0.4708	2.8849	158.084
AP1_148@OD1	ARG_175@HH12	ARG_175@NH1	2235282	0.4706	2.833	149.16
PRO_95@O	LEU_99@H	LEU_99@N	2227757	0.469	2.8761	158.748
GLU_365@OE2	HD1_411@HD1	HD1_411@ND1	2224086	0.4682	2.7492	153.635
GLN_170@O	TRP_174@H	TRP_174@N	2215764	0.4665	2.8845	161.291
LEU_483@O	LYS_487@H	LYS_487@N	2206367	0.4645	2.8865	161.041
LEU_457@O	LYS_461@H	LYS_461@N	2204837	0.4642	2.8812	158.156
ARG_19@O	ILE_23@H	ILE_23@N	2204406	0.4641	2.8816	158.921
ALA_478@O	HD3_482@H	HD3_482@N	2198964	0.4629	2.8745	153.262
HD2_201@O	LEU_205@H	LEU_205@N	2198233	0.4628	2.8971	162.804
LEU_62@O	LEU_74@H	LEU_74@N	2198022	0.4627	2.8754	160.702
ASP_20@O	LYS_24@H	LYS_24@N	2195903	0.4623	2.8788	160.778
ALA_219@O	HD3_223@H	HD3_223@N	2195160	0.4621	2.875	153.148
TYR_193@O	TRP_197@H	TRP_197@N	2188823	0.4608	2.8724	162.029
ARG_473@O	LEU_477@H	LEU_477@N	2168625	0.4566	2.8871	163.115
ASP_380@OD2	THR_377@HG1	THR_377@OG1	2164563	0.4557	2.7026	162.593
GLU_425@O	GLN_429@H	GLN_429@N	2156793	0.4541	2.8746	157.338
ASP_279@O	LYS_283@H	LYS_283@N	2156491	0.454	2.8802	159.463
GLU_106@OE1	ARG_102@HE	ARG_102@NE	2149605	0.4525	2.8304	156.7
VAL_486@O	LEU_490@H	LEU_490@N	2129946	0.4484	2.8852	159.078
GLU_106@OE2	ARG_102@HE	ARG_102@NE	2128176	0.448	2.8311	156.644
ARG_278@O	ILE_282@H	ILE_282@N	2113623	0.445	2.8846	158.853
ML1_259@O6	ARG_102@HH22	ARG_102@NH2	2112515	0.4447	2.8827	163.937
SER_405@O	GLN_409@H	GLN_409@N	2107814	0.4437	2.8788	161.747
TRP_480@O	GLU_484@H	GLU_484@N	2107737	0.4437	2.8837	153.735
GLU_425@OE1	SER_84@HG	SER_84@OG	2093285	0.4407	2.6562	164.317
ASN_161@OD1	LEU_164@H	LEU_164@N	2089149	0.4398	2.8687	156.164
GLU_297@O	MET_301@H	MET_301@N	2082544	0.4384	2.8772	157.866
ASP_380@OD1	THR_377@HG1	THR_377@OG1	2070779	0.436	2.7017	162.654
TRP_431@O	GLU_435@H	GLU_435@N	2066979	0.4352	2.8732	160.402
ILE_298@O	LEU_302@H	LEU_302@N	2062279	0.4342	2.89	160.082
GLU_166@OE1	ARG_169@HH21	ARG_169@NH2	2060337	0.4338	2.7902	159.301
PRO_269@O	VAL_273@H	VAL_273@N	2060009	0.4337	2.8795	163.717
ILE_39@O	LEU_43@H	LEU_43@N	2055059	0.4326	2.8896	159.794
LEU_364@O	ILE_368@H	ILE_368@N	2053134	0.4322	2.8927	155.785
ILE_314@O	ILE_318@H	ILE_318@N	2050170	0.4316	2.8906	160.422
ASP_498@O	ASP_502@H	ASP_502@N	2048786	0.4313	2.8818	160.887
ALA_472@O	LYS_476@H	LYS_476@N	2044894	0.4305	2.8935	161.659
GLN_488@O	GLU_492@H	GLU_492@N	2038559	0.4292	2.883	158.927
GLU_404@O	MET_408@H	MET_408@N	2034224	0.4283	2.8837	164.327
ALA_213@O	LYS_217@H	LYS_217@N	2031380	0.4277	2.8939	161.66
GLU_145@OE2	ARG_175@HH21	ARG_175@NH2	2029867	0.4273	2.8121	154.242
MET_422@O	LEU_426@H	LEU_426@N	2008349	0.4228	2.8853	156.343
LEU_105@O	ILE_109@H	ILE_109@N	2003290	0.4217	2.8934	155.244
GLU_38@O	MET_42@H	MET_42@N	2002664	0.4216	2.878	157.998
LEU_321@O	LEU_333@H	LEU_333@N	2001426	0.4214	2.8699	157.779
ALA_101@O	LEU_105@H	LEU_105@N	1998314	0.4207	2.8911	163.77
GLN_150@O	ALA_154@H	ALA_154@N	1994752	0.4199	2.8797	155.923
GLU_356@OE1	SER_162@HG	SER_162@OG	1988527	0.4186	2.6762	164.569
GLU_356@OE2	SER_162@HG	SER_162@OG	1980657	0.417	2.6772	164.54
AP1_407@OD1	ARG_434@HH12	ARG_434@NH1	1975743	0.4159	2.8431	149.486
ARG_214@O	LEU_218@H	LEU_218@N	1970402	0.4148	2.8911	163.231
GLN_229@O	GLU_233@H	GLU_233@N	1970126	0.4148	2.8835	157.972
TRP_221@O	GLU_225@H	GLU_225@N	1968694	0.4145	2.8878	154.562
ILE_240@O	GLY_244@H	GLY_244@N	1962071	0.4131	2.8658	151.694
ASP_239@O	ASP_243@H	ASP_243@N	1958610	0.4123	2.8819	161.649
ARG_51@O	ILE_55@H	ILE_55@N	1954479	0.4115	2.8885	158.325
ASN_420@OD1	LEU_423@H	LEU_423@N	1948659	0.4102	2.8654	154.81
ALA_360@O	LEU_364@H	LEU_364@N	1940962	0.4086	2.891	163.657
ARG_126@O	GLN_130@H	GLN_130@N	1940917	0.4086	2.8738	158.062
ARG_310@O	ILE_314@H	ILE_314@N	1937704	0.4079	2.8877	157.835
ALA_206@O	LYS_210@H	LYS_210@N	1932250	0.4068	2.8867	159.303
ASP_121@OD1	THR_118@H	THR_118@N	1928475	0.406	2.8449	158.921
PRO_10@O	VAL_14@H	VAL_14@N	1920386	0.4043	2.8815	163.853
GLU_365@OE1	ARG_361@HH21	ARG_361@NH2	1916536	0.4035	2.8318	155.826
GLU_106@OE2	HD1_152@HD1	HD1_152@ND1	1913402	0.4028	2.7525	151.655
ARG_119@O	VAL_123@H	VAL_123@N	1906745	0.4014	2.8823	159.107
GLU_106@OE2	ARG_102@HH21	ARG_102@NH2	1888180	0.3975	2.828	155.649
GLU_106@OE1	HD1_152@HD1	HD1_152@ND1	1888112	0.3975	2.7518	151.459
LEU_313@O	GLU_317@H	GLU_317@N	1887742	0.3974	2.8756	151.55
GLN_409@O	ALA_413@H	ALA_413@N	1883493	0.3965	2.8763	154.798
ILE_55@O	ILE_59@H	ILE_59@N	1873693	0.3945	2.892	160.653
ARG_378@O	VAL_382@H	VAL_382@N	1872516	0.3942	2.8829	159.294
ASP_83@O	ALA_87@H	ALA_87@N	1864972	0.3926	2.8655	157.722
GLU_484@OE2	GLN_362@HE21	GLN_362@NE2	1862537	0.3921	2.8291	164.892
MET_439@O	LEU_443@H	LEU_443@N	1860257	0.3916	2.8807	159.926
ALA_465@O	LYS_469@H	LYS_469@N	1859046	0.3914	2.8874	159.127
MET_180@O	LEU_184@H	LEU_184@N	1847377	0.3889	2.8877	161.559
GLU_106@OE1	ARG_102@HH21	ARG_102@NH2	1844168	0.3882	2.829	155.648
GLU_365@OE2	ARG_361@HE	ARG_361@NE	1835949	0.3865	2.8282	158.063
GLU_356@OE2	SER_162@H	SER_162@N	1831648	0.3856	2.8256	160.481
SER_144@O	AP1_148@H	AP1_148@N	1828142	0.3849	2.8619	154.201
SER_450@O	LYS_454@H	LYS_454@N	1827894	0.3848	2.8755	158.575
ASP_86@O	CYS_90@H	CYS_90@N	1819573	0.3831	2.8709	156.801
GLU_356@OE1	SER_162@H	SER_162@N	1818636	0.3829	2.8249	160.439
GLN_271@O	ALA_275@H	ALA_275@N	1816575	0.3824	2.8776	154.614
TRP_197@O	HD2_201@H	HD2_201@N	1812397	0.3816	2.8969	162.067
SER_146@O	GLN_150@H	GLN_150@N	1808647	0.3808	2.8799	159.258
ASN_485@O	ARG_489@H	ARG_489@N	1806144	0.3802	2.8814	159.058
GLU_225@OE1	GLN_103@HE21	GLN_103@NE2	1806022	0.3802	2.8321	164.922
GLU_225@OE2	GLN_103@HE21	GLN_103@NE2	1804424	0.3799	2.8321	164.951
SER_143@O	GLY_147@H	GLY_147@N	1785741	0.3759	2.8505	153.881
GLU_97@OE2	SER_421@H	SER_421@N	1770920	0.3728	2.8251	160.567
PRO_35@O	GLU_38@H	GLU_38@N	1766851	0.372	2.8674	147.401
ARG_385@O	GLN_389@H	GLN_389@N	1764722	0.3715	2.8759	158.949
GLU_484@OE1	GLN_362@HE21	GLN_362@NE2	1760753	0.3707	2.83	164.767
VAL_227@O	LEU_231@H	LEU_231@N	1758000	0.3701	2.8892	159.399
ASP_121@OD2	THR_118@HG1	THR_118@OG1	1748446	0.3681	2.7042	162.47
ASP_380@OD2	THR_377@H	THR_377@N	1737768	0.3658	2.8441	158.943
GLU_97@OE2	SER_421@HG	SER_421@OG	1735638	0.3654	2.6851	164.168
LEU_423@O	PHE_427@H	PHE_427@N	1729013	0.364	2.8953	157.557
PRO_294@O	GLU_297@H	GLU_297@N	1720063	0.3621	2.867	147.072
GLU_145@O	MET_149@H	MET_149@N	1713298	0.3607	2.8899	164.379
LEU_54@O	GLU_58@H	GLU_58@N	1712188	0.3605	2.8776	151.227
GLU_145@OE1	ARG_175@HH21	ARG_175@NH2	1711664	0.3603	2.8153	153.134
GLU_166@OE2	ARG_169@HE	ARG_169@NE	1709326	0.3599	2.8308	158.831
TRP_440@O	HIE_444@H	HIE_444@N	1704010	0.3587	2.8653	158.261
ILE_463@O	LEU_467@H	LEU_467@N	1672889	0.3522	2.903	158.824
TRP_480@O	GLN_362@HE22	GLN_362@NE2	1669038	0.3514	2.8856	160.622
GLU_38@OE2	ARG_37@HH21	ARG_37@NH2	1666608	0.3509	2.8071	156.225
SER_191@O	LYS_195@H	LYS_195@N	1665948	0.3507	2.8746	158.624
LEU_490@O	SER_494@H	SER_494@N	1659523	0.3494	2.8888	154.997
ASP_380@OD1	THR_377@H	THR_377@N	1658070	0.3491	2.8438	158.87
GLY_147@O	PHE_151@H	PHE_151@N	1656950	0.3488	2.8764	157.779
SER_403@O	AP1_407@H	AP1_407@N	1649655	0.3473	2.8546	154.912
LEU_164@O	PHE_168@H	PHE_168@N	1649615	0.3473	2.8966	158.31
PRO_438@O	GLN_442@H	GLN_442@N	1629646	0.3431	2.877	160.199
GLU_13@O	MET_17@H	MET_17@N	1626556	0.3424	2.883	156.458
GLU_166@O	GLN_170@H	GLN_170@N	1622768	0.3416	2.8647	158.416
GLU_297@OE2	ARG_296@HH21	ARG_296@NH2	1622749	0.3416	2.8074	156.073
LEU_246@O	SER_249@H	SER_249@N	1617131	0.3404	2.8871	153.489
GLU_97@OE1	SER_421@H	SER_421@N	1615743	0.3402	2.825	160.428
GLU_38@OE1	ARG_37@HH21	ARG_37@NH2	1613000	0.3396	2.8082	155.887
GLU_297@OE1	ARG_296@HH21	ARG_296@NH2	1612254	0.3394	2.8076	156.042
GLU_97@OE1	SER_421@HG	SER_421@OG	1607496	0.3384	2.6856	164.155
GLU_166@OE2	ARG_169@HH21	ARG_169@NH2	1605821	0.3381	2.7945	158.167
LEU_231@O	SER_235@H	SER_235@N	1600015	0.3368	2.8914	155.595
GLU_404@OE2	ARG_434@HH21	ARG_434@NH2	1597152	0.3362	2.8095	154.398
ILE_204@O	LEU_208@H	LEU_208@N	1594886	0.3358	2.9062	158.924
GLY_199@O	GLN_203@H	GLN_203@N	1583650	0.3334	2.8898	155.397
GLU_365@OE1	HD1_411@HD1	HD1_411@ND1	1583614	0.3334	2.7501	152.48
ILE_441@O	SER_445@HG	SER_445@OG	1577856	0.3322	2.7467	162.232
GLN_80@O	SER_84@H	SER_84@N	1566418	0.3298	2.8675	158.76
PRO_354@O	LEU_358@H	LEU_358@N	1565368	0.3296	2.8857	160.611
GLU_356@O	ALA_360@H	ALA_360@N	1562949	0.329	2.8965	156.269
LYS_228@O	LEU_232@H	LEU_232@N	1561570	0.3288	2.8942	158.524
GLU_290@O	VAL_332@H	VAL_332@N	1557503	0.3279	2.8733	162.597
GLU_295@OE2	ARG_306@HE	ARG_306@NE	1527759	0.3216	2.8118	154.077
GLU_425@OE1	ARG_428@HE	ARG_428@NE	1523761	0.3208	2.8429	158.834
GLU_52@O	MET_56@H	MET_56@N	1523317	0.3207	2.8942	157.135
TRP_221@O	GLN_103@HE22	GLN_103@NE2	1522247	0.3205	2.8871	160.142
GLU_145@OE2	ML1_259@H6	ML1_259@O2	1518642	0.3197	2.6734	163.423
LYS_487@O	LEU_491@H	LEU_491@N	1513604	0.3187	2.8942	158.441
MET_125@O	LEU_129@H	LEU_129@N	1513295	0.3186	2.8842	156.253
TRP_181@O	HIE_185@H	HIE_185@N	1511821	0.3183	2.8863	159.034
ILE_499@O	GLY_503@H	GLY_503@N	1508526	0.3176	2.8709	151.482
LEU_505@O	TRP_509@H	TRP_509@N	1502706	0.3164	2.8461	160.087
GLU_145@OE1	ML1_259@H6	ML1_259@O2	1501749	0.3162	2.6753	163.377
GLU_36@OE2	ARG_47@HE	ARG_47@NE	1499058	0.3156	2.812	154.137
GLU_404@OE1	ARG_434@HH21	ARG_434@NH2	1498234	0.3154	2.8117	153.822
LEU_280@O	THR_284@H	THR_284@N	1496601	0.3151	2.8691	153.035
GLN_130@O	ARG_134@H	ARG_134@N	1494736	0.3147	2.8751	156.208
GLY_458@O	GLN_462@H	GLN_462@N	1493129	0.3143	2.8932	155.379
LEU_21@O	THR_25@H	THR_25@N	1483076	0.3122	2.8729	153.69
GLU_295@OE1	ARG_306@HE	ARG_306@NE	1476185	0.3108	2.8128	154.02
GLU_196@O	ASP_200@H	ASP_200@N	1471779	0.3098	2.8659	151.859
GLU_36@OE1	ARG_47@HE	ARG_47@NE	1463510	0.3081	2.8125	154.14
ASP_200@OD1	ASN_226@HD22	ASN_226@ND2	1463090	0.308	2.8389	160.513
ILE_441@O	SER_445@H	SER_445@N	1461816	0.3078	2.8723	155.712
GLU_311@O	MET_315@H	MET_315@N	1452409	0.3058	2.8958	157.252
GLN_432@O	ASN_436@H	ASN_436@N	1447894	0.3048	2.8733	155.512
LEU_388@O	GLU_392@H	GLU_392@N	1447778	0.3048	2.8864	160.654
GLU_38@OE1	ARG_37@HE	ARG_37@NE	1447504	0.3047	2.8172	159.138
GLU_31@O	VAL_73@H	VAL_73@N	1444304	0.3041	2.8786	162.187
VAL_73@O	GLY_30@H	GLY_30@N	1443591	0.3039	2.8508	157.436
GLU_36@OE2	ARG_47@HH21	ARG_47@NH2	1433858	0.3019	2.8052	152.097
GLU_295@OE2	ARG_306@HH21	ARG_306@NH2	1427237	0.3005	2.8056	151.82
ASP_121@OD2	THR_118@H	THR_118@N	1425768	0.3002	2.8452	158.993
LEU_246@O	TRP_250@H	TRP_250@N	1418282	0.2986	2.8469	161.412
GLU_295@OE1	ARG_306@HH21	ARG_306@NH2	1414253	0.2977	2.8052	151.994
GLU_323@OE2	ARG_325@HH21	ARG_325@NH2	1413820	0.2976	2.8059	155.519
GLU_64@OE1	ARG_66@HH21	ARG_66@NH2	1408965	0.2966	2.7962	155.421
MET_384@O	LEU_388@H	LEU_388@N	1406693	0.2961	2.8883	155.641
GLU_404@OE2	ML1_518@H6	ML1_518@O2	1400766	0.2949	2.6693	164.37
GLU_323@OE1	ARG_325@HH21	ARG_325@NH2	1399789	0.2947	2.8059	155.476
GLU_36@OE1	ARG_47@HH21	ARG_47@NH2	1396707	0.294	2.8047	152.128
GLU_297@OE1	ARG_296@HE	ARG_296@NE	1385864	0.2918	2.8171	159.118
SER_366@O	GLU_370@H	GLU_370@N	1384099	0.2914	2.9026	156.777
GLN_429@O	TRP_433@H	TRP_433@N	1377963	0.2901	2.8951	160.058
GLU_297@OE2	ARG_296@HE	ARG_296@NE	1371056	0.2886	2.817	159.119
GLU_317@O	GLY_320@H	GLY_320@N	1370508	0.2885	2.8863	147.571
GLU_97@O	ALA_101@H	ALA_101@N	1367472	0.2879	2.8999	155.458
TRP_433@O	ASN_437@HD22	ASN_437@ND2	1361762	0.2867	2.8496	159.955
MET_276@O	LEU_280@H	LEU_280@N	1350291	0.2843	2.8927	155.665
GLU_64@OE2	ARG_66@HH21	ARG_66@NH2	1348128	0.2838	2.7963	155.526
SER_84@O	ASN_88@H	ASN_88@N	1346795	0.2835	2.8832	154.367
GLU_38@OE2	ARG_37@HE	ARG_37@NE	1345371	0.2832	2.8173	159.12
ALA_216@O	MET_220@H	MET_220@N	1344465	0.283	2.9073	158.462
LEU_129@O	GLU_133@H	GLU_133@N	1343121	0.2828	2.8886	162.037
GLU_323@OE1	ARG_325@HE	ARG_325@NE	1339324	0.282	2.8257	156.548
ML1_518@O6	ARG_361@HH22	ARG_361@NH2	1330272	0.2801	2.8861	163.828
GLN_389@O	ARG_393@H	ARG_393@N	1328285	0.2796	2.8793	154.948
GLU_166@OE1	ARG_169@HE	ARG_169@NE	1327077	0.2794	2.8329	157.9
GLU_323@OE2	ARG_325@HE	ARG_325@NE	1326519	0.2793	2.8255	156.485
LYS_383@O	ALA_387@H	ALA_387@N	1322766	0.2785	2.8927	158.248
GLU_58@O	GLY_61@H	GLY_61@N	1321323	0.2782	2.8885	147.878
GLU_272@O	MET_276@H	MET_276@N	1320903	0.2781	2.892	157.858
MET_17@O	LEU_21@H	LEU_21@N	1319234	0.2777	2.8932	155.2
THR_118@O	ILE_122@H	ILE_122@N	1312261	0.2763	2.9068	160.957
ASP_189@OD2	ARG_194@HH21	ARG_194@NH2	1309990	0.2758	2.7848	157.153
ASP_243@O	LEU_246@H	LEU_246@N	1309601	0.2757	2.8918	147.956
THR_48@O	GLU_52@H	GLU_52@N	1289376	0.2714	2.8957	160.895
PRO_294@O	ILE_298@H	ILE_298@N	1279305	0.2693	2.8967	159.519
THR_307@O	GLU_311@H	GLU_311@N	1276164	0.2687	2.8959	161.038
GLY_406@O	PHE_410@H	PHE_410@N	1271813	0.2677	2.8856	156.028
GLU_379@O	LYS_383@H	LYS_383@N	1270088	0.2674	2.8924	157.664
ASP_497@O	TYR_500@H	TYR_500@N	1258198	0.2649	2.8903	150.105
TRP_172@O	GLU_176@H	GLU_176@N	1258162	0.2649	2.8862	160.904
GLU_145@OE1	ARG_175@HE	ARG_175@NE	1257617	0.2648	2.8273	156.159
SER_430@O	ARG_434@H	ARG_434@N	1256567	0.2645	2.891	155.274
GLU_120@O	LYS_124@H	LYS_124@N	1255060	0.2642	2.8928	157.829
GLU_295@OE2	ARG_310@HH21	ARG_310@NH2	1254649	0.2641	2.7948	156.708
THR_377@O	ILE_381@H	ILE_381@N	1253044	0.2638	2.9075	160.914
GLN_12@O	ALA_16@H	ALA_16@N	1249440	0.263	2.8863	153.326
GLU_132@OE1	SER_144@HG	SER_144@OG	1231842	0.2593	2.6964	162.808
GLN_386@O	LEU_390@H	LEU_390@N	1226717	0.2583	2.8851	156.239
GLU_425@OE2	ARG_428@HE	ARG_428@NE	1218090	0.2564	2.842	155.64
GLU_64@OE1	ARG_66@HE	ARG_66@NE	1216019	0.256	2.8343	155.684
ASP_449@O	ARG_453@H	ARG_453@N	1213456	0.2555	2.8787	162.976
GLU_64@OE2	ARG_66@HE	ARG_66@NE	1211722	0.2551	2.8353	156.106
GLU_295@OE1	ARG_310@HH21	ARG_310@NH2	1210433	0.2548	2.7954	156.511
GLU_36@OE2	ARG_51@HH21	ARG_51@NH2	1209559	0.2546	2.7938	157.207
GLU_425@OE1	ARG_428@HH21	ARG_428@NH2	1205515	0.2538	2.7855	158.003
ASN_177@OD1	GLN_173@HE22	GLN_173@NE2	1199528	0.2525	2.8428	158.203
GLN_462@O	ALA_466@H	ALA_466@N	1198888	0.2524	2.9002	158.023
PRO_85@O	VAL_89@H	VAL_89@N	1197309	0.2521	2.8784	157.571
PRO_35@O	ILE_39@H	ILE_39@N	1190433	0.2506	2.897	159.725
ASP_200@OD2	ASN_226@HD22	ASN_226@ND2	1187126	0.2499	2.8367	160.625
ALA_475@O	MET_479@H	MET_479@N	1174870	0.2473	2.9101	158.899
SER_402@O	GLY_406@H	GLY_406@N	1174486	0.2473	2.8641	154.563
GLU_132@OE2	SER_144@HG	SER_144@OG	1170610	0.2464	2.6929	162.862
GLN_203@O	ALA_207@H	ALA_207@N	1167619	0.2458	2.9015	158.008
ALA_140@O	SER_144@H	SER_144@N	1152331	0.2426	2.8715	158.633
VAL_332@O	GLY_289@H	GLY_289@N	1150486	0.2422	2.8527	158.56
ASN_226@O	ARG_230@H	ARG_230@N	1148482	0.2418	2.8936	158.561
GLY_329@O	ARG_325@H	ARG_325@N	1144408	0.2409	2.8599	157.223
GLU_36@OE1	ARG_51@HH21	ARG_51@NH2	1144278	0.2409	2.7947	156.927
TRP_456@O	HD2_460@H	HD2_460@N	1141279	0.2403	2.9028	161.016
GLU_166@O	GLN_170@HE22	GLN_170@NE2	1140280	0.2401	2.8453	162.127
ALA_299@O	VAL_304@H	VAL_304@N	1139592	0.2399	2.9034	161.058
GLU_404@OE1	ML1_518@H6	ML1_518@O2	1136821	0.2393	2.6644	164.637
GLU_295@OE1	ARG_310@HE	ARG_310@NE	1132218	0.2384	2.8263	157.46
HD1_411@O	ALA_415@H	ALA_415@N	1130114	0.2379	2.9088	158.178
PHE_234@O	VAL_237@H	VAL_237@N	1110213	0.2337	2.8953	154.725
GLU_295@OE2	ARG_310@HE	ARG_310@NE	1109822	0.2336	2.8259	157.32
GLU_41@OE1	ARG_37@HH22	ARG_37@NH2	1101150	0.2318	2.8083	156.719
LYS_124@O	ALA_128@H	ALA_128@N	1098589	0.2313	2.8935	157.93
SER_107@O	GLU_111@H	GLU_111@N	1093667	0.2302	2.9087	156.788
GLU_300@OE2	ARG_296@HH22	ARG_296@NH2	1093486	0.2302	2.8081	156.707
GLU_41@OE2	ARG_37@HH22	ARG_37@NH2	1092932	0.2301	2.8083	156.703
ASP_86@OD1	ARG_278@HH22	ARG_278@NH2	1092792	0.2301	2.8024	159.49
GLU_36@OE1	ARG_51@HE	ARG_51@NE	1088246	0.2291	2.8274	157.895
GLU_300@OE1	ARG_296@HH22	ARG_296@NH2	1086410	0.2287	2.8083	156.707
ASP_86@OD2	ARG_278@HH22	ARG_278@NH2	1083547	0.2281	2.8029	159.085
ASP_86@OD2	ARG_278@HH12	ARG_278@NH1	1080057	0.2274	2.8063	160.264
LEU_505@O	SER_508@H	SER_508@N	1072151	0.2257	2.8897	153.491
ALA_156@O	THR_159@H	THR_159@N	1063325	0.2239	2.9074	155.443
GLY_142@O	SER_146@H	SER_146@N	1061012	0.2234	2.8883	158.597
LEU_232@O	ASN_236@HD22	ASN_236@ND2	1058326	0.2228	2.8395	159.571
GLN_359@OE1	ASN_161@HD22	ASN_161@ND2	1057742	0.2227	2.8435	160.96
ASP_86@OD1	ARG_278@HH12	ARG_278@NH1	1053785	0.2218	2.8058	160.25
ARG_268@O	GLN_271@H	GLN_271@N	1049312	0.2209	2.8723	149.592
ASN_28@O	GLU_31@H	GLU_31@N	1049089	0.2209	2.8964	155.732
GLY_70@O	ARG_66@H	ARG_66@N	1048206	0.2207	2.8594	157.94
SER_343@O	ASN_347@H	ASN_347@N	1046687	0.2204	2.884	157.639
GLU_132@O	LEU_136@H	LEU_136@N	1046172	0.2202	2.8806	157.976
ALA_40@O	VAL_45@H	VAL_45@N	1039655	0.2189	2.9043	160.916
GLU_36@OE2	ARG_51@HE	ARG_51@NE	1037315	0.2184	2.8277	157.614
ASP_189@OD1	ARG_194@HH21	ARG_194@NH2	1037084	0.2183	2.7897	157.014
ASP_459@OD1	HD3_482@HD1	HD3_482@ND1	1020769	0.2149	2.8568	159.463
ASP_200@OD1	HD3_223@HD1	HD3_223@ND1	1014359	0.2135	2.8631	159.131
ASP_459@OD2	HD3_482@HD1	HD3_482@ND1	1012084	0.2131	2.8574	159.409
LEU_426@O	SER_430@H	SER_430@N	1011717	0.213	2.9065	159.374
ARG_296@O	GLU_300@H	GLU_300@N	1001281	0.2108	2.897	156.224
HD3_223@O	VAL_227@H	VAL_227@N	1000708	0.2107	2.9087	157.057
PHE_242@O	PHE_247@H	PHE_247@N	998929	0.2103	2.8833	150.352
TYR_193@O	GLU_196@H	GLU_196@N	998112	0.2101	2.8726	153.925
LEU_390@O	GLU_394@H	GLU_394@N	996855	0.2099	2.8775	157.807
LEU_443@O	LEU_447@H	LEU_447@N	995797	0.2096	2.8788	157.239
ARG_37@O	GLU_41@H	GLU_41@N	994350	0.2093	2.8966	156.088
GLU_41@OE1	ARG_37@HH12	ARG_37@NH1	993379	0.2091	2.8096	157.504
ALA_369@O	ALA_373@H	ALA_373@N	992956	0.209	2.9045	155.741
GLU_41@OE2	ARG_37@HH12	ARG_37@NH1	992770	0.209	2.8094	157.519
ASP_502@O	LEU_505@H	LEU_505@N	988061	0.208	2.8951	147.93
LEU_491@O	ASN_495@HD22	ASN_495@ND2	985143	0.2074	2.836	159.962
GLY_401@O	SER_405@H	SER_405@N	979471	0.2062	2.8782	158.407
GLN_429@OE1	ASN_340@HD21	ASN_340@ND2	975158	0.2053	2.8417	161.947
GLN_432@O	ASN_436@HD22	ASN_436@ND2	970322	0.2043	2.83	160.807
ALA_110@O	ALA_114@H	ALA_114@N	968334	0.2039	2.9056	156.08
ASP_342@O	ASP_345@H	ASP_345@N	957167	0.2015	2.8789	153.285
ALA_113@O	GLN_116@H	GLN_116@N	953473	0.2007	2.8864	151.067
GLU_455@O	ASP_459@H	ASP_459@N	952826	0.2006	2.8831	150.63
LYS_195@O	GLY_199@H	GLY_199@N	947895	0.1996	2.8934	151.674
ASP_238@O	TYR_241@H	TYR_241@N	938241	0.1975	2.8976	150.916
GLY_401@O	SER_405@HG	SER_405@OG	938207	0.1975	2.7559	161.084
LEU_467@O	LYS_470@H	LYS_470@N	934693	0.1968	2.8985	146.693
LEU_443@O	TYR_504@HH	TYR_504@OH	933297	0.1965	2.7591	161.925
GLY_337@O	THR_341@HG1	THR_341@OG1	923939	0.1945	2.7829	162.664
ASN_178@O	TRP_181@H	TRP_181@N	920684	0.1938	2.8928	154
LEU_167@O	SER_171@HG	SER_171@OG	920112	0.1937	2.7929	162.962
PRO_141@O	GLU_145@H	GLU_145@N	918663	0.1934	2.8905	160.111
GLU_394@O	SER_397@H	SER_397@N	917082	0.1931	2.8842	153.921
ALA_372@O	GLN_375@H	GLN_375@N	914267	0.1925	2.887	150.962
GLU_391@O	LEU_395@H	LEU_395@N	913712	0.1924	2.8775	158.439
GLU_166@OE2	SER_343@HG	SER_343@OG	913484	0.1923	2.6724	163.651
GLN_183@O	HIE_187@H	HIE_187@N	902770	0.1901	2.8768	155.03
ALA_87@O	ASN_91@H	ASN_91@N	902614	0.19	2.8746	152.201
SER_162@O	GLU_166@H	GLU_166@N	896612	0.1888	2.8915	156.037
ASP_342@O	ALA_346@H	ALA_346@N	894474	0.1883	2.8892	159.181
GLN_362@OE1	LYS_487@HZ3	LYS_487@NZ	890661	0.1875	2.7945	153.118
LEU_246@O	SER_249@HG	SER_249@OG	889074	0.1872	2.7042	162.835
GLU_404@OE1	ARG_434@HE	ARG_434@NE	887440	0.1868	2.8433	153.86
GLN_362@OE1	LYS_487@HZ1	LYS_487@NZ	887034	0.1867	2.7942	153.118
ML1_259@O4	ARG_194@HH12	ARG_194@NH1	885374	0.1864	2.8685	152.153
LEU_208@O	LYS_211@H	LYS_211@N	876569	0.1845	2.8999	146.687
GLN_362@OE1	LYS_487@HZ2	LYS_487@NZ	876525	0.1845	2.794	153.133
ASN_287@O	GLU_290@H	GLU_290@N	863357	0.1818	2.8968	156.111
GLU_394@O	SER_398@H	SER_398@N	862548	0.1816	2.8617	157.636
PHE_493@O	VAL_496@H	VAL_496@N	862073	0.1815	2.8975	155.064
GLN_429@O	GLN_429@HE22	GLN_429@NE2	861557	0.1814	2.8702	150.418
ASP_342@OD1	ARG_19@HH22	ARG_19@NH2	860944	0.1813	2.7951	159.383
MET_149@O	TRP_172@HE1	TRP_172@NE1	843378	0.1776	2.8552	159.716
ARG_175@O	ASN_178@H	ASN_178@N	842522	0.1774	2.8955	152.491
ASN_178@OD1	ARG_278@HH21	ARG_278@NH2	841947	0.1773	2.8223	155.095
GLU_435@O	ARG_19@HH12	ARG_19@NH1	841747	0.1772	2.8065	156.453
LEU_426@O	SER_430@HG	SER_430@OG	836418	0.1761	2.8153	162.847
ASP_448@OD2	ARG_453@HH21	ARG_453@NH2	831164	0.175	2.7879	156.572
GLU_145@OE2	ARG_175@HE	ARG_175@NE	827211	0.1741	2.8401	153.738
PRO_344@O	VAL_348@H	VAL_348@N	825294	0.1737	2.8787	159.575
ALA_87@O	ASN_91@HD22	ASN_91@ND2	820313	0.1727	2.8369	159.842
GLY_94@O	LEU_98@H	LEU_98@N	816554	0.1719	2.8992	158.648
GLN_12@OE1	GLN_12@H	GLN_12@N	816005	0.1718	2.8415	148.048
GLU_300@OE2	ARG_296@HH12	ARG_296@NH1	815766	0.1717	2.8097	157.442
GLU_391@OE2	ML1_518@H8	ML1_518@O4	815620	0.1717	2.6859	161.931
THR_341@O	ASN_436@HD22	ASN_436@ND2	815542	0.1717	2.8364	161.528
HIE_444@O	ASP_448@H	ASP_448@N	814425	0.1715	2.8739	158.065
GLU_300@OE1	ARG_296@HH12	ARG_296@NH1	806629	0.1698	2.8094	157.458
LYS_454@O	GLY_458@H	GLY_458@N	803545	0.1692	2.8885	150.468
HD1_152@O	ALA_156@H	ALA_156@N	801448	0.1687	2.9147	158.214
LEU_131@O	GLU_135@H	GLU_135@N	800469	0.1685	2.8833	157.626
ASP_342@OD2	ARG_19@HH12	ARG_19@NH1	799494	0.1683	2.7914	158.082
ALA_346@O	ASN_350@H	ASN_350@N	798729	0.1682	2.8719	155.32
ASP_507@OD2	SER_508@HG	SER_508@OG	796406	0.1677	2.7344	163.523
GLU_425@OE2	ASN_88@HD22	ASN_88@ND2	791933	0.1667	2.8041	161.469
GLY_353@O	LEU_357@H	LEU_357@N	791280	0.1666	2.9012	159.613
ARG_9@O	GLN_12@H	GLN_12@N	788731	0.166	2.8802	150.619
ASN_367@O	PHE_371@H	PHE_371@N	787029	0.1657	2.9083	157.563
LEU_74@O	SER_77@HG	SER_77@OG	778624	0.1639	2.7285	161.24
SER_421@O	GLU_425@H	GLU_425@N	774683	0.1631	2.8949	153.91
GLU_135@O	SER_138@H	SER_138@N	774658	0.1631	2.8836	153.618
GLU_120@OE2	ARG_119@HH21	ARG_119@NH2	773916	0.1629	2.811	153.964
GLU_120@OE1	ARG_119@HH21	ARG_119@NH2	773476	0.1628	2.8112	153.975
HD3_482@O	VAL_486@H	VAL_486@N	768074	0.1617	2.9119	158.406
GLN_103@OE1	LYS_228@HZ1	LYS_228@NZ	767987	0.1617	2.7944	152.355
GLN_103@OE1	LYS_228@HZ2	LYS_228@NZ	763442	0.1607	2.7944	152.417
ASP_448@OD1	ARG_453@HH21	ARG_453@NH2	760565	0.1601	2.7893	156.865
PHE_112@O	GLN_116@H	GLN_116@N	756959	0.1594	2.8865	160.866
GLU_166@OE1	SER_343@HG	SER_343@OG	752507	0.1584	2.6748	162.796
GLN_103@OE1	LYS_228@HZ3	LYS_228@NZ	748796	0.1576	2.7945	152.343
ASP_200@OD2	HD3_223@HD1	HD3_223@ND1	748492	0.1576	2.864	159.164
ALA_415@O	THR_418@H	THR_418@N	744471	0.1567	2.9133	155.497
GLU_379@OE2	ARG_378@HH21	ARG_378@NH2	744268	0.1567	2.8107	153.917
PRO_251@O	LYS_254@H	LYS_254@N	743886	0.1566	2.8969	157.217
HIE_185@O	LEU_188@H	LEU_188@N	743701	0.1566	2.8835	152.719
GLU_272@OE1	GLN_183@HE22	GLN_183@NE2	742360	0.1563	2.8186	162.329
LEU_232@O	SER_235@HG	SER_235@OG	740910	0.156	2.7131	161.342
ASP_189@O	ARG_194@HE	ARG_194@NE	739985	0.1558	2.8292	157.406
GLU_492@O	ASN_495@H	ASN_495@N	739926	0.1558	2.8916	147.241
GLN_183@OE1	GLN_271@HE22	GLN_271@NE2	739445	0.1557	2.8389	160.298
LEU_129@O	GLU_132@H	GLU_132@N	738779	0.1555	2.8978	152.061
GLU_379@OE1	ARG_378@HH21	ARG_378@NH2	733807	0.1545	2.8112	153.914
ARG_268@O	GLU_272@H	GLU_272@N	732903	0.1543	2.8893	161.09
PHE_371@O	GLN_375@H	GLN_375@N	732629	0.1542	2.8899	160.611
THR_118@O	ASP_121@H	ASP_121@N	731115	0.1539	2.8829	145.197
GLU_233@O	ASN_236@H	ASN_236@N	730483	0.1538	2.8942	148.919
ASP_497@O	PHE_501@H	PHE_501@N	729219	0.1535	2.8896	159.897
THR_377@O	ASP_380@H	ASP_380@N	717162	0.151	2.8839	145.229
GLN_127@O	LEU_131@H	LEU_131@N	716797	0.1509	2.8904	156.756
ASP_189@OD2	ARG_194@HE	ARG_194@NE	714786	0.1505	2.8545	151.442
LEU_184@O	LEU_188@H	LEU_188@N	711768	0.1498	2.8889	157.723
GLU_404@OE2	ARG_434@HE	ARG_434@NE	711635	0.1498	2.8366	154.004
GLU_425@OE2	SER_84@HG	SER_84@OG	711559	0.1498	2.6879	161.779
ASP_448@OD2	ARG_453@HE	ARG_453@NE	710406	0.1496	2.8324	156.877
LEU_184@O	TYR_241@HH	TYR_241@OH	706410	0.1487	2.7581	161.848
ASN_161@OD1	MET_163@H	MET_163@N	704940	0.1484	2.8639	144.724
GLU_484@OE2	LYS_487@HZ1	LYS_487@NZ	696877	0.1467	2.771	157.728
PHE_501@O	PHE_506@H	PHE_506@N	694755	0.1463	2.8869	150.948
GLU_484@OE2	LYS_487@HZ2	LYS_487@NZ	693223	0.1459	2.7708	157.69
GLU_272@OE2	GLN_183@HE22	GLN_183@NE2	692885	0.1459	2.8186	162.2
ASP_507@OD1	SER_508@HG	SER_508@OG	692274	0.1457	2.7283	163.621
GLU_492@OE2	ARG_489@HH21	ARG_489@NH2	690102	0.1453	2.8068	155.438
GLU_492@OE1	ARG_489@HH21	ARG_489@NH2	688778	0.145	2.807	155.691
GLN_271@OE1	TRP_181@HE1	TRP_181@NE1	687418	0.1447	2.8408	161.365
THR_46@O	VAL_49@H	VAL_49@N	685694	0.1444	2.895	147.123
ASP_248@OD1	SER_249@HG	SER_249@OG	682968	0.1438	2.7422	162.15
ASP_459@OD1	ASN_485@HD22	ASN_485@ND2	682847	0.1438	2.8378	158.574
ASP_342@OD1	ARG_19@HH12	ARG_19@NH1	682559	0.1437	2.8037	156.68
GLU_120@OE2	ARG_119@HE	ARG_119@NE	682556	0.1437	2.8296	155.618
GLU_120@OE1	ARG_119@HE	ARG_119@NE	678569	0.1429	2.8298	155.601
THR_305@O	VAL_308@H	VAL_308@N	677981	0.1427	2.8953	147.423
GLU_484@OE2	LYS_487@HZ3	LYS_487@NZ	677656	0.1427	2.771	157.684
ASP_189@OD1	ARG_194@HE	ARG_194@NE	675505	0.1422	2.8534	152.382
ASN_485@OD1	TRP_456@HE1	TRP_456@NE1	674781	0.1421	2.8457	155.129
ASN_485@OD1	ARG_489@HH11	ARG_489@NH1	673786	0.1418	2.8297	155.369
PHE_410@O	ILE_414@H	ILE_414@N	669832	0.141	2.9173	156.274
GLU_58@OE2	VAL_65@H	VAL_65@N	669544	0.141	2.8494	161.763
LEU_443@O	HIE_446@H	HIE_446@N	668580	0.1408	2.8882	150.491
GLU_379@OE2	ARG_378@HE	ARG_378@NE	667781	0.1406	2.8294	155.551
SER_403@O	ARG_453@HH22	ARG_453@NH2	664117	0.1398	2.8344	155.041
GLU_132@OE1	ML1_259@H8	ML1_259@O4	656308	0.1382	2.6918	164.862
GLU_379@OE1	ARG_378@HE	ARG_378@NE	656279	0.1382	2.8296	155.552
GLU_484@OE1	LYS_487@HZ1	LYS_487@NZ	653373	0.1376	2.7707	157.505
ASP_342@OD2	ARG_19@HH22	ARG_19@NH2	652962	0.1375	2.7921	158.852
GLU_484@OE1	LYS_487@HZ3	LYS_487@NZ	652521	0.1374	2.7705	157.436
GLU_484@OE1	LYS_487@HZ2	LYS_487@NZ	651460	0.1371	2.771	157.485
GLU_225@OE2	LYS_228@HZ2	LYS_228@NZ	649399	0.1367	2.7763	157.737
ARG_325@O	ALA_328@H	ALA_328@N	649380	0.1367	2.8837	153.134
SER_77@O	ASP_342@H	ASP_342@N	648947	0.1366	2.8627	156.767
GLU_391@OE2	SER_403@HG	SER_403@OG	647141	0.1362	2.6855	163.286
ALA_413@O	ALA_417@H	ALA_417@N	645513	0.1359	2.8786	147.046
LEU_252@O	VAL_255@H	VAL_255@N	644220	0.1356	2.8956	156.69
ASN_437@OD1	TRP_440@H	TRP_440@N	641149	0.135	2.8745	157.16
GLU_233@OE2	ARG_230@HH21	ARG_230@NH2	639745	0.1347	2.8075	155.056
GLU_225@OE2	LYS_228@HZ1	LYS_228@NZ	638938	0.1345	2.7766	157.733
GLU_225@OE1	LYS_228@HZ3	LYS_228@NZ	638397	0.1344	2.7771	157.635
GLU_58@OE1	VAL_65@H	VAL_65@N	637146	0.1341	2.8502	161.985
GLU_225@OE2	LYS_228@HZ3	LYS_228@NZ	635971	0.1339	2.7766	157.7
GLU_225@OE1	LYS_228@HZ2	LYS_228@NZ	635831	0.1339	2.777	157.632
GLU_391@OE1	ARG_453@HH21	ARG_453@NH2	632923	0.1332	2.8203	154.095
GLU_391@OE1	SER_403@HG	SER_403@OG	632152	0.1331	2.6816	163.21
GLU_233@OE1	ARG_230@HH21	ARG_230@NH2	631123	0.1329	2.808	155.285
GLY_142@O	SER_146@HG	SER_146@OG	630277	0.1327	2.755	161.796
GLU_391@OE2	ARG_453@HH21	ARG_453@NH2	629818	0.1326	2.8207	152.972
GLU_233@OE2	ARG_230@HH11	ARG_230@NH1	628508	0.1323	2.7946	157.999
ASP_459@OD2	ASN_485@HD22	ASN_485@ND2	628248	0.1323	2.8393	159.048
ALA_93@O	TRP_181@HE1	TRP_181@NE1	628245	0.1323	2.8389	157.703
ASP_448@OD1	ARG_453@HE	ARG_453@NE	625985	0.1318	2.8335	157.238
GLU_225@OE1	LYS_228@HZ1	LYS_228@NZ	625512	0.1317	2.7774	157.628
GLU_13@OE2	ARG_9@HH21	ARG_9@NH2	623478	0.1313	2.8031	155.504
GLU_233@OE1	ARG_230@HH11	ARG_230@NH1	620678	0.1307	2.7954	158.043
ASN_108@O	PHE_112@H	PHE_112@N	619325	0.1304	2.9098	156.655
LEU_167@O	SER_171@H	SER_171@N	618989	0.1303	2.9015	160.114
ARG_134@O	SER_138@H	SER_138@N	618188	0.1301	2.8673	158.31
ALA_399@O	SER_402@HG	SER_402@OG	617365	0.13	2.7237	160.6
GLU_391@OE1	ML1_518@H8	ML1_518@O4	615072	0.1295	2.6902	162.109
GLU_13@OE1	ARG_9@HH21	ARG_9@NH2	609448	0.1283	2.8035	155.191
LYS_319@O	GLY_337@H	GLY_337@N	607515	0.1279	2.848	157.779
GLN_429@OE1	GLN_170@HE22	GLN_170@NE2	606178	0.1276	2.8401	156.839
ASN_226@OD1	TRP_197@HE1	TRP_197@NE1	605825	0.1275	2.8446	154.695
GLU_132@OE2	ML1_259@H8	ML1_259@O4	603965	0.1272	2.698	164.85
PHE_112@O	LEU_115@H	LEU_115@N	602919	0.1269	2.8993	149.687
LEU_252@O	ASP_256@H	ASP_256@N	601061	0.1265	2.8639	160.225
LEU_292@O	ILE_330@H	ILE_330@N	600908	0.1265	2.8772	154.795
TYR_452@O	GLU_455@H	GLU_455@N	597757	0.1258	2.8773	146.733
SER_79@O	ASP_83@H	ASP_83@N	593495	0.1249	2.8789	161.747
GLU_365@OE1	SER_430@HG	SER_430@OG	592107	0.1247	2.7201	162.588
GLU_132@OE1	ARG_194@HH11	ARG_194@NH1	592008	0.1246	2.7787	154.656
ASP_248@OD2	SER_249@HG	SER_249@OG	591637	0.1246	2.7359	161.873
SER_77@O	THR_341@HG1	THR_341@OG1	591596	0.1245	2.779	161.347
GLU_317@OE2	ARG_326@HH12	ARG_326@NH1	588846	0.124	2.8041	156.704
HIE_444@O	LEU_447@H	LEU_447@N	587766	0.1237	2.8887	153.188
ASP_75@O	SER_343@HG	SER_343@OG	587162	0.1236	2.7064	162.487
PRO_400@O	GLU_404@H	GLU_404@N	583550	0.1229	2.8857	159.389
GLU_317@OE1	ARG_326@HH12	ARG_326@NH1	583358	0.1228	2.804	156.766
ASN_437@OD1	MET_439@H	MET_439@N	580137	0.1221	2.8842	150.575
GLU_97@OE1	TRP_250@HE1	TRP_250@NE1	579548	0.122	2.8129	162.056
ML1_259@O2	HIE_185@HE2	HIE_185@NE2	576675	0.1214	2.8811	152.115
GLU_97@OE2	TRP_250@HE1	TRP_250@NE1	576052	0.1213	2.8158	162.02
ASP_279@OD2	LYS_283@HZ1	LYS_283@NZ	574391	0.1209	2.7931	156.208
THR_341@OG1	GLN_432@HE22	GLN_432@NE2	573801	0.1208	2.8754	159.97
PHE_371@O	LEU_374@H	LEU_374@N	572558	0.1205	2.9001	149.491
ASP_279@OD2	LYS_283@HZ3	LYS_283@NZ	571255	0.1203	2.793	156.24
GLY_320@O	GLY_337@H	GLY_337@N	570897	0.1202	2.8379	154.935
ASP_279@OD2	LYS_283@HZ2	LYS_283@NZ	568759	0.1197	2.7926	156.199
ASP_238@OD1	ASP_239@H	ASP_239@N	568622	0.1197	2.8298	143.976
ASP_279@OD1	LYS_283@HZ1	LYS_283@NZ	568279	0.1196	2.7945	156.254
ARG_326@O	ARG_291@HH22	ARG_291@NH2	566528	0.1193	2.8202	154.399
GLY_61@O	GLY_78@H	GLY_78@N	565748	0.1191	2.8626	155.277
ASP_238@OD2	ASP_239@H	ASP_239@N	565546	0.1191	2.829	143.958
GLU_13@OE1	ARG_9@HE	ARG_9@NE	564009	0.1187	2.8188	157.014
ASP_449@O	TYR_452@H	TYR_452@N	560637	0.118	2.8865	149.09
SER_171@O	ARG_175@H	ARG_175@N	557153	0.1173	2.8942	155.158
GLU_356@OE2	TRP_509@HE1	TRP_509@NE1	557129	0.1173	2.8103	162.453
ASP_279@OD1	LYS_283@HZ3	LYS_283@NZ	556703	0.1172	2.7948	156.201
ASP_279@OD1	LYS_283@HZ2	LYS_283@NZ	555494	0.1169	2.7948	156.209
HIE_185@O	ASP_189@H	ASP_189@N	554220	0.1167	2.88	155.338
GLU_132@OE2	ARG_194@HH11	ARG_194@NH1	552772	0.1164	2.7833	154.665
PRO_10@O	GLU_13@H	GLU_13@N	552303	0.1163	2.8838	146.283
VAL_89@O	GLN_271@HE22	GLN_271@NE2	551999	0.1162	2.8343	156.571
GLU_133@O	ALA_137@H	ALA_137@N	551314	0.1161	2.878	155.663
GLN_359@O	LEU_363@H	LEU_363@N	550575	0.1159	2.9166	157.893
ASN_420@OD1	MET_422@H	MET_422@N	549034	0.1156	2.8676	144.038
GLN_429@OE1	ASN_81@HD22	ASN_81@ND2	548685	0.1155	2.8544	158.245
GLU_31@O	TYR_27@HH	TYR_27@OH	548286	0.1154	2.7005	164.525
GLN_442@O	SER_445@HG	SER_445@OG	547548	0.1153	2.7138	161.496
ARG_66@O	ALA_69@H	ALA_69@N	546824	0.1151	2.8838	153.681
ASP_345@O	CYS_349@H	CYS_349@N	545644	0.1149	2.8896	156.909
ASN_340@OD1	TRP_433@HE1	TRP_433@NE1	543218	0.1144	2.8508	157.919
ASP_497@OD2	ASP_498@H	ASP_498@N	542994	0.1143	2.8307	143.65
PHE_151@O	ILE_155@H	ILE_155@N	541230	0.1139	2.9208	155.716
VAL_324@O	ARG_326@HH11	ARG_326@NH1	540360	0.1138	2.8031	153.006
ALA_93@O	GLN_271@HE21	GLN_271@NE2	540331	0.1138	2.8361	151.931
GLU_233@OE2	ARG_230@HE	ARG_230@NE	537584	0.1132	2.8242	156.036
ASP_190@O	ARG_194@H	ARG_194@N	536063	0.1129	2.8853	162.016
SER_265@O	ARG_268@HH11	ARG_268@NH1	535655	0.1128	2.8272	157.606
GLU_31@OE1	ARG_32@H	ARG_32@N	535296	0.1127	2.8544	154.717
GLU_317@OE2	VAL_324@H	VAL_324@N	532434	0.1121	2.8579	162.539
ASP_190@OD2	LEU_192@H	LEU_192@N	529453	0.1115	2.8798	158.53
GLU_317@OE1	VAL_324@H	VAL_324@N	529133	0.1114	2.8581	162.754
GLU_13@OE2	ARG_9@HE	ARG_9@NE	523723	0.1103	2.8188	156.797
GLU_394@OE2	ARG_393@HH21	ARG_393@NH2	523130	0.1101	2.8047	152.921
GLU_492@OE2	ARG_489@HE	ARG_489@NE	523051	0.1101	2.8272	156.551
ARG_325@O	GLY_329@H	GLY_329@N	522790	0.1101	2.8921	159.128
GLU_31@OE2	ARG_32@H	ARG_32@N	522450	0.11	2.8545	154.673
GLN_442@O	HIE_446@H	HIE_446@N	521308	0.1097	2.8851	152.669
SER_421@O	ASN_88@HD21	ASN_88@ND2	520588	0.1096	2.863	157.209
ARG_66@O	TYR_72@HH	TYR_72@OH	519979	0.1095	2.7417	164.185
GLN_375@OE1	THR_418@HG1	THR_418@OG1	519353	0.1093	2.6987	159.716
LEU_184@O	TYR_245@HH	TYR_245@OH	516694	0.1088	2.7667	159.937
GLU_145@OE2	SER_146@HG	SER_146@OG	512787	0.108	2.68	164.498
GLU_394@OE2	ARG_393@HE	ARG_393@NE	506255	0.1066	2.8238	154.314
GLU_391@OE2	ARG_453@HE	ARG_453@NE	504896	0.1063	2.8217	155.379
GLU_356@OE1	TRP_509@HE1	TRP_509@NE1	504573	0.1062	2.8134	162.292
ASP_497@OD1	ASP_498@H	ASP_498@N	504281	0.1062	2.8295	143.62
LYS_254@O	GLN_100@HE21	GLN_100@NE2	501112	0.1055	2.8468	159.31
ALA_7@O	ASN_436@HD21	ASN_436@ND2	500238	0.1053	2.8284	159.576
LYS_60@O	GLN_432@HE21	GLN_432@NE2	499804	0.1052	2.8583	158.508
ASN_177@O	ARG_278@HE	ARG_278@NE	497702	0.1048	2.8328	151.822
ASP_75@O	SER_77@H	SER_77@N	496771	0.1046	2.8716	147.18
ASN_340@OD1	GLN_429@HE21	GLN_429@NE2	496262	0.1045	2.8386	162.483
GLU_233@OE1	ARG_230@HE	ARG_230@NE	495515	0.1043	2.8243	155.975
ALA_399@O	SER_403@HG	SER_403@OG	492559	0.1037	2.746	161.02
LEU_447@O	ARG_489@HH21	ARG_489@NH2	490176	0.1032	2.8332	151.914
GLU_317@OE2	ARG_326@HH22	ARG_326@NH2	490076	0.1032	2.8068	157.421
THR_25@O	TYR_27@H	TYR_27@N	489579	0.1031	2.8448	144.43
ALA_399@O	SER_403@H	SER_403@N	488209	0.1028	2.8842	157.202
PHE_168@O	SER_171@HG	SER_171@OG	487959	0.1027	2.7426	160.02
GLN_271@OE1	ARG_268@H	ARG_268@N	487623	0.1027	2.8691	160.184
ASP_20@OD1	LYS_24@HZ2	LYS_24@NZ	487116	0.1026	2.7997	155.887
GLU_394@OE1	ARG_393@HH21	ARG_393@NH2	486320	0.1024	2.8056	153.065
SER_336@O	ASN_76@HD21	ASN_76@ND2	485689	0.1023	2.8446	159.008
ML1_518@O2	HIE_444@HE2	HIE_444@NE2	485574	0.1022	2.8895	153.812
GLU_492@OE1	ARG_489@HE	ARG_489@NE	485494	0.1022	2.8273	156.541
ASN_88@O	ALA_93@H	ALA_93@N	483798	0.1019	2.9051	154.61
ASP_20@OD1	LYS_24@HZ3	LYS_24@NZ	481947	0.1015	2.8	155.817
SER_421@OG	ASN_88@HD21	ASN_88@ND2	478518	0.1007	2.8882	162.096
ASP_334@OD2	ARG_278@HE	ARG_278@NE	477726	0.1006	2.8078	156.761
ASP_20@OD1	LYS_24@HZ1	LYS_24@NZ	477687	0.1006	2.8004	155.863
GLU_317@OE1	ARG_326@HH22	ARG_326@NH2	476208	0.1003	2.8081	157.415
ASN_347@O	ALA_352@H	ALA_352@N	476105	0.1002	2.8849	157.327
THR_82@O	TRP_174@HE1	TRP_174@NE1	473801	0.0997	2.8581	158.322
GLY_329@O	ARG_291@HH11	ARG_291@NH1	473243	0.0996	2.84	156.761
PHE_247@O	TRP_250@H	TRP_250@N	471233	0.0992	2.8869	151.711
ASN_485@OD1	GLN_481@HE22	GLN_481@NE2	471058	0.0992	2.8557	155.43
GLU_425@OE2	ARG_428@HH11	ARG_428@NH1	470273	0.099	2.7976	156.524
GLU_394@OE1	ARG_393@HE	ARG_393@NE	468792	0.0987	2.8237	154.517
GLU_365@OE2	SER_430@HG	SER_430@OG	468301	0.0986	2.7249	162.708
LEU_321@O	ASP_334@H	ASP_334@N	468276	0.0986	2.8923	153.826
GLU_492@OE1	ARG_489@HH11	ARG_489@NH1	466217	0.0982	2.7952	158.289
GLN_267@O	GLN_183@HE21	GLN_183@NE2	465780	0.0981	2.8606	155.301
GLU_492@OE2	ARG_489@HH11	ARG_489@NH1	465558	0.098	2.7949	158.264
ASP_20@OD2	LYS_24@HZ2	LYS_24@NZ	465145	0.0979	2.8008	155.77
ASP_20@OD2	LYS_24@HZ3	LYS_24@NZ	465049	0.0979	2.8005	155.758
LEU_192@O	GLU_196@H	GLU_196@N	464907	0.0979	2.8925	156.862
GLU_272@OE1	ARG_268@HE	ARG_268@NE	464600	0.0978	2.8206	155.936
ALA_328@O	ARG_291@HH11	ARG_291@NH1	463754	0.0976	2.8387	155.944
GLU_97@OE2	LYS_254@HZ1	LYS_254@NZ	462649	0.0974	2.8001	155.4
ASP_20@OD2	LYS_24@HZ1	LYS_24@NZ	462513	0.0974	2.8004	155.809
PRO_269@O	GLU_272@H	GLU_272@N	461635	0.0972	2.8808	145.463
GLU_290@OE2	ARG_291@H	ARG_291@N	460609	0.097	2.8568	154.756
TRP_456@O	ASP_459@H	ASP_459@N	460583	0.097	2.8893	148.77
GLU_225@OE1	GLN_229@HE22	GLN_229@NE2	460288	0.0969	2.8306	161.835
GLU_97@OE2	LYS_254@HZ3	LYS_254@NZ	459856	0.0968	2.8002	155.361
GLU_97@OE2	LYS_254@HZ2	LYS_254@NZ	459552	0.0967	2.8002	155.327
THR_46@O	VAL_50@H	VAL_50@N	459521	0.0967	2.9189	161.374
ALA_387@O	GLU_391@H	GLU_391@N	456675	0.0961	2.9059	157.498
PRO_179@O	ILE_182@H	ILE_182@N	455571	0.0959	2.8818	145.62
GLU_225@OE2	GLN_229@HE22	GLN_229@NE2	454811	0.0957	2.8308	161.866
ASP_189@OD1	TYR_193@H	TYR_193@N	454168	0.0956	2.8	152.112
GLU_272@OE2	ARG_268@HE	ARG_268@NE	453877	0.0956	2.8179	156.608
GLN_100@OE1	ASN_420@HD22	ASN_420@ND2	453650	0.0955	2.8511	160.614
ARG_9@O	GLU_13@H	GLU_13@N	453440	0.0955	2.8933	159.383
ALA_346@O	ASN_350@HD22	ASN_350@ND2	453262	0.0954	2.8375	159.544
GLU_290@OE1	ARG_291@H	ARG_291@N	451773	0.0951	2.8575	154.662
GLU_135@O	SER_138@HG	SER_138@OG	449296	0.0946	2.713	161.281
ASP_334@OD1	ARG_278@HH21	ARG_278@NH2	448333	0.0944	2.824	152.946
GLU_404@OE2	ARG_434@HH12	ARG_434@NH1	446632	0.094	2.7978	156.834
GLU_404@OE1	ARG_434@HH12	ARG_434@NH1	446589	0.094	2.7951	157.347
ASN_81@O	GLN_429@HE21	GLN_429@NE2	445259	0.0937	2.8575	160.227
ASP_190@OD1	LEU_192@H	LEU_192@N	445229	0.0937	2.8819	159.376
TRP_172@O	ARG_175@H	ARG_175@N	444164	0.0935	2.9022	148.891
LEU_388@O	GLU_391@H	GLU_391@N	443944	0.0935	2.8962	154.361
LEU_491@O	ASN_495@H	ASN_495@N	443851	0.0934	2.8886	151.029
LEU_232@O	ASN_236@H	ASN_236@N	440751	0.0928	2.89	151.02
THR_284@O	TYR_286@H	TYR_286@N	439833	0.0926	2.8266	145.038
GLU_97@OE1	LYS_254@HZ2	LYS_254@NZ	438219	0.0923	2.8012	155.099
GLU_404@OE2	ARG_434@HH22	ARG_434@NH2	435471	0.0917	2.8038	156.666
GLU_97@OE1	LYS_254@HZ3	LYS_254@NZ	434191	0.0914	2.8017	155.093
PRO_510@O	LYS_513@H	LYS_513@N	433976	0.0914	2.8965	156.845
MET_479@O	LEU_483@H	LEU_483@N	433883	0.0913	2.9324	163.757
GLU_97@OE1	LYS_254@HZ1	LYS_254@NZ	433153	0.0912	2.8015	155.023
GLU_64@OE2	VAL_65@H	VAL_65@N	433039	0.0912	2.8266	156.09
GLU_394@O	SER_398@HG	SER_398@OG	432903	0.0911	2.7245	161.924
GLU_135@O	SER_139@H	SER_139@N	432661	0.0911	2.8546	154.594
GLN_170@OE1	THR_82@HG1	THR_82@OG1	432079	0.091	2.7423	161.323
GLN_12@OE1	SER_402@H	SER_402@N	431889	0.0909	2.8665	157.198
GLU_135@OE2	ARG_134@HE	ARG_134@NE	431295	0.0908	2.8257	155.342
ASP_334@OD1	SER_336@HG	SER_336@OG	430879	0.0907	2.6919	162.395
GLU_135@OE2	ARG_134@HH21	ARG_134@NH2	430093	0.0905	2.8076	153.642
LEU_491@O	VAL_496@H	VAL_496@N	428794	0.0903	2.886	152.888
ASP_342@OD1	SER_79@H	SER_79@N	428702	0.0903	2.8137	156.701
ASN_226@OD1	ARG_230@HH11	ARG_230@NH1	427447	0.09	2.8267	154.706
GLU_484@OE1	TYR_504@HH	TYR_504@OH	425952	0.0897	2.6895	163.829
ASN_226@OD1	GLN_222@HE22	GLN_222@NE2	425460	0.0896	2.8594	154.543
GLU_135@OE1	ARG_134@HH21	ARG_134@NH2	424992	0.0895	2.8078	153.9
GLN_12@OE1	ARG_9@H	ARG_9@N	423328	0.0891	2.8788	159.818
ASN_347@O	ASN_350@H	ASN_350@N	420950	0.0886	2.8972	152.075
ASP_189@OD1	SER_191@H	SER_191@N	418564	0.0881	2.8843	157.231
GLU_272@OE1	ARG_268@HH21	ARG_268@NH2	417982	0.088	2.7966	154.229
LEU_451@O	GLU_455@H	GLU_455@N	417692	0.0879	2.8965	158.002
GLU_394@OE1	SER_402@HG	SER_402@OG	417156	0.0878	2.6755	163.476
GLY_70@O	ARG_32@HH11	ARG_32@NH1	416798	0.0877	2.8339	157.338
GLU_391@OE1	ARG_453@HE	ARG_453@NE	416747	0.0877	2.8261	155.343
GLU_13@OE2	SER_445@HG	SER_445@OG	415726	0.0875	2.6648	164.335
GLU_404@OE1	ARG_434@HH22	ARG_434@NH2	414563	0.0873	2.8041	156.388
THR_305@O	VAL_309@H	VAL_309@N	413720	0.0871	2.9191	161.174
GLU_135@OE1	ARG_134@HE	ARG_134@NE	411783	0.0867	2.8261	155.312
ASP_471@OD1	ALA_474@H	ALA_474@N	408698	0.086	2.8984	162.998
GLU_13@OE1	SER_445@HG	SER_445@OG	408515	0.086	2.6638	164.403
ASP_212@OD2	ALA_215@H	ALA_215@N	408498	0.086	2.8987	162.961
ASP_471@OD2	ALA_474@H	ALA_474@N	408027	0.0859	2.8988	163.003
SER_79@O	THR_82@H	THR_82@N	404438	0.0851	2.8942	153.456
PRO_344@O	ASN_347@H	ASN_347@N	402585	0.0848	2.8865	150.965
GLY_503@O	TRP_440@HE1	TRP_440@NE1	401979	0.0846	2.8399	151.715
ASP_334@OD2	ARG_278@HH21	ARG_278@NH2	401276	0.0845	2.8285	150.999
MET_220@O	LEU_224@H	LEU_224@N	400099	0.0842	2.9343	163.991
ASP_448@OD1	GLY_401@H	GLY_401@N	399885	0.0842	2.8367	157.869
GLU_425@O	GLN_429@HE22	GLN_429@NE2	399664	0.0841	2.8537	161.567
LEU_136@O	SER_139@H	SER_139@N	399660	0.0841	2.8949	152.935
GLU_272@OE2	GLN_267@HE22	GLN_267@NE2	399102	0.084	2.8129	162.661
ASP_190@O	TYR_193@H	TYR_193@N	398114	0.0838	2.8915	149
LEU_491@O	SER_494@HG	SER_494@OG	398061	0.0838	2.7172	160.383
ALA_154@O	ALA_158@H	ALA_158@N	397966	0.0838	2.8904	145.883
ASP_212@OD1	ALA_215@H	ALA_215@N	396463	0.0835	2.8987	162.907
PHE_506@O	SER_494@HG	SER_494@OG	395789	0.0833	2.7252	162.837
GLU_394@OE2	SER_402@HG	SER_402@OG	394358	0.083	2.6753	163.662
ARG_134@O	SER_138@HG	SER_138@OG	393332	0.0828	2.7454	161.678
GLU_392@O	ALA_396@H	ALA_396@N	393213	0.0828	2.8813	155.662
GLN_183@O	SER_186@HG	SER_186@OG	393091	0.0828	2.7132	161.359
VAL_348@O	ASP_351@H	ASP_351@N	389254	0.0819	2.8888	149.367
ASP_83@OD1	SER_336@HG	SER_336@OG	386430	0.0814	2.7015	162.42
ASN_88@O	ASN_91@H	ASN_91@N	386189	0.0813	2.8883	145.963
GLY_142@O	ALA_266@H	ALA_266@N	385542	0.0812	2.8861	162.446
GLU_272@OE1	GLN_267@HE22	GLN_267@NE2	385430	0.0811	2.8131	162.715
ASN_340@O	SER_79@HG	SER_79@OG	384735	0.081	2.7531	162.133
LYS_2@O	THR_5@HG1	THR_5@OG1	382908	0.0806	2.7334	161.818
LEU_447@O	ARG_489@HE	ARG_489@NE	382237	0.0805	2.8607	152.945
ARG_393@O	SER_397@HG	SER_397@OG	378450	0.0797	2.7373	161.733
GLU_132@OE2	ARG_194@HH21	ARG_194@NH2	377641	0.0795	2.7775	160.181
LEU_447@O	ASP_449@H	ASP_449@N	377396	0.0795	2.8482	147.13
PHE_242@O	ASP_248@H	ASP_248@N	376842	0.0793	2.9009	153.649
ASP_345@OD2	TRP_433@HE1	TRP_433@NE1	376038	0.0792	2.8361	153.871
ARG_66@O	GLY_70@H	GLY_70@N	375632	0.0791	2.8945	158.373
ASN_178@OD1	ARG_278@HH11	ARG_278@NH1	375178	0.079	2.8209	154.86
GLU_435@O	ARG_19@HH22	ARG_19@NH2	374795	0.0789	2.8377	150.537
GLY_78@O	ASN_81@H	ASN_81@N	374779	0.0789	2.8961	157.789
ASP_448@OD1	LEU_451@H	LEU_451@N	374028	0.0787	2.851	158.274
GLU_176@O	GLN_271@HE22	GLN_271@NE2	373845	0.0787	2.8436	157.301
ASP_238@O	PHE_242@H	PHE_242@N	373094	0.0785	2.9056	160.574
GLU_157@OE1	LYS_124@HZ3	LYS_124@NZ	372668	0.0785	2.7706	158.465
GLU_132@OE2	ML1_259@H9	ML1_259@O5	372305	0.0784	2.7725	162.573
GLU_455@O	GLY_458@H	GLY_458@N	372178	0.0784	2.8783	144.984
LEU_505@O	SER_508@HG	SER_508@OG	372098	0.0783	2.7001	162.796
GLU_272@OE2	ARG_268@HH21	ARG_268@NH2	372069	0.0783	2.8	153.648
ASP_190@OD1	ARG_230@HH22	ARG_230@NH2	371639	0.0782	2.818	158.658
ASP_189@OD1	ARG_194@H	ARG_194@N	371557	0.0782	2.8661	161.653
GLU_132@OE1	ML1_259@H9	ML1_259@O5	370812	0.0781	2.779	162.573
GLU_157@OE1	LYS_124@HZ2	LYS_124@NZ	370788	0.0781	2.7706	158.453
ALA_328@O	TYR_331@HH	TYR_331@OH	370687	0.078	2.7513	163.218
GLU_166@OE1	ASN_347@HD22	ASN_347@ND2	370585	0.078	2.8251	160.462
ASP_86@OD1	SER_336@HG	SER_336@OG	370401	0.078	2.6772	163.25
ASP_448@OD2	GLY_401@H	GLY_401@N	370179	0.0779	2.8372	157.666
ASN_76@O	SER_79@HG	SER_79@OG	368253	0.0775	2.7478	159.037
ARG_67@O	ARG_32@HH22	ARG_32@NH2	366712	0.0772	2.8181	154.014
ARG_326@O	ARG_291@HH12	ARG_291@NH1	366545	0.0772	2.8396	151.344
GLU_157@OE1	LYS_124@HZ1	LYS_124@NZ	365684	0.077	2.7706	158.497
GLU_111@OE2	LYS_217@HZ2	LYS_217@NZ	365585	0.077	2.7996	157.518
GLU_145@O	ML1_259@H7	ML1_259@O3	363762	0.0766	2.7526	155.61
GLU_157@OE2	LYS_124@HZ1	LYS_124@NZ	363246	0.0765	2.7712	158.411
GLU_111@OE1	LYS_217@HZ2	LYS_217@NZ	363134	0.0764	2.8	157.468
SER_398@O	SER_402@H	SER_402@N	362385	0.0763	2.859	157.774
ASP_334@OD2	SER_336@HG	SER_336@OG	361969	0.0762	2.6885	162.25
ASP_449@OD2	SER_450@HG	SER_450@OG	360862	0.076	2.7014	165.098
ASN_335@O	SER_338@HG	SER_338@OG	360566	0.0759	2.7207	160.014
ASP_86@OD2	SER_336@HG	SER_336@OG	360186	0.0758	2.6789	163.296
GLU_484@OE2	TYR_504@HH	TYR_504@OH	359852	0.0758	2.6904	163.81
GLU_111@OE2	LYS_217@HZ3	LYS_217@NZ	359817	0.0758	2.8	157.505
GLU_272@OE2	SER_262@HG	SER_262@OG	358735	0.0755	2.6655	163.942
GLU_111@OE1	LYS_217@HZ3	LYS_217@NZ	358457	0.0755	2.8004	157.492
ASP_449@OD1	SER_450@HG	SER_450@OG	358239	0.0754	2.7009	165.092
GLU_133@OE1	LYS_202@HZ2	LYS_202@NZ	356737	0.0751	2.7911	156.846
GLU_111@OE2	LYS_217@HZ1	LYS_217@NZ	356197	0.075	2.8001	157.489
GLU_111@OE1	LYS_217@HZ1	LYS_217@NZ	356109	0.075	2.8003	157.439
ASP_345@OD1	GLN_432@HE21	GLN_432@NE2	355910	0.0749	2.821	162.341
ASP_243@OD2	ARG_268@HH12	ARG_268@NH1	355841	0.0749	2.7758	162.487
GLU_290@O	TYR_286@HH	TYR_286@OH	354746	0.0747	2.7155	163.654
GLU_272@OE1	SER_262@HG	SER_262@OG	354213	0.0746	2.6638	163.906
ALA_40@O	ASP_44@H	ASP_44@N	353737	0.0745	2.8633	143.188
GLU_133@OE1	LYS_202@HZ3	LYS_202@NZ	353653	0.0745	2.7915	156.799
GLU_157@OE2	LYS_124@HZ2	LYS_124@NZ	353642	0.0745	2.771	158.413
GLU_132@OE1	ARG_194@HH21	ARG_194@NH2	353333	0.0744	2.7794	159.316
GLU_133@OE2	LYS_202@HZ2	LYS_202@NZ	351987	0.0741	2.7913	156.789
GLU_133@OE2	LYS_202@HZ3	LYS_202@NZ	351819	0.0741	2.7915	156.777
ASN_367@OD1	LYS_476@HZ3	LYS_476@NZ	351368	0.074	2.8145	152.435
GLU_157@OE2	LYS_124@HZ3	LYS_124@NZ	351329	0.074	2.7714	158.41
GLY_337@O	THR_341@H	THR_341@N	350222	0.0737	2.8897	157.357
GLN_271@OE1	GLN_271@H	GLN_271@N	350107	0.0737	2.8448	149.714
VAL_89@O	ASP_92@H	ASP_92@N	350002	0.0737	2.8867	145.363
GLU_133@OE1	LYS_202@HZ1	LYS_202@NZ	349954	0.0737	2.7915	156.818
ASP_189@OD2	SER_191@H	SER_191@N	349878	0.0737	2.8892	159.28
ASN_367@OD1	LYS_476@HZ2	LYS_476@NZ	349076	0.0735	2.8147	152.403
GLY_142@O	ARG_194@HH11	ARG_194@NH1	349073	0.0735	2.8404	161.901
SER_398@O	ARG_453@HH12	ARG_453@NH1	348864	0.0734	2.8276	157.694
SER_338@O	ASN_76@HD22	ASN_76@ND2	348763	0.0734	2.8431	158.522
GLU_484@OE2	GLN_488@HE22	GLN_488@NE2	348198	0.0733	2.8326	161.566
ASN_367@OD1	LYS_476@HZ1	LYS_476@NZ	348041	0.0733	2.8145	152.41
GLU_133@OE2	LYS_202@HZ1	LYS_202@NZ	347881	0.0732	2.791	156.81
GLY_78@O	SER_338@HG	SER_338@OG	347708	0.0732	2.7081	162.879
SER_262@O	SER_265@H	SER_265@N	346791	0.073	2.8822	151.757
PHE_234@O	ASP_238@H	ASP_238@N	346234	0.0729	2.8996	160.983
GLU_435@OE2	LYS_60@HZ2	LYS_60@NZ	346123	0.0729	2.7942	156.719
GLU_370@OE2	LYS_476@HZ1	LYS_476@NZ	344999	0.0726	2.7966	157.639
ASP_448@OD2	ARG_453@H	ARG_453@N	344673	0.0726	2.8584	165.088
ASP_86@O	ASN_91@H	ASN_91@N	343916	0.0724	2.871	155.37
GLU_356@OE1	GLY_353@H	GLY_353@N	341425	0.0719	2.8546	162.348
ALA_128@O	GLU_132@H	GLU_132@N	341425	0.0719	2.8987	157.224
GLU_36@OE1	GLU_36@H	GLU_36@N	341262	0.0718	2.833	150.977
ASN_437@OD1	ARG_19@HH22	ARG_19@NH2	340767	0.0717	2.8119	155.586
GLU_370@OE1	LYS_476@HZ2	LYS_476@NZ	340762	0.0717	2.7969	157.619
ASP_334@OD1	SER_336@H	SER_336@N	340330	0.0716	2.8786	157.269
GLU_370@OE2	LYS_476@HZ3	LYS_476@NZ	339917	0.0716	2.7968	157.595
ASP_342@OD1	GLN_80@H	GLN_80@N	339856	0.0715	2.8547	161.903
ALA_69@O	ARG_32@HE	ARG_32@NE	339617	0.0715	2.846	153.993
GLU_370@OE1	LYS_476@HZ1	LYS_476@NZ	339063	0.0714	2.7973	157.561
ASN_347@O	ASP_351@H	ASP_351@N	338870	0.0713	2.8799	154.969
ASP_243@OD1	ARG_268@HH21	ARG_268@NH2	338816	0.0713	2.7955	157.817
GLU_370@OE2	LYS_476@HZ2	LYS_476@NZ	338060	0.0712	2.7969	157.58
GLU_370@OE1	LYS_476@HZ3	LYS_476@NZ	337108	0.071	2.797	157.578
GLU_416@OE1	LYS_383@HZ3	LYS_383@NZ	336458	0.0708	2.7697	158.161
GLU_484@OE1	GLN_488@HE22	GLN_488@NE2	335777	0.0707	2.8339	161.514
GLU_416@OE2	LYS_383@HZ1	LYS_383@NZ	333972	0.0703	2.77	158.125
ASN_340@O	GLN_170@HE21	GLN_170@NE2	333857	0.0703	2.8543	157.151
GLU_435@OE2	LYS_60@HZ1	LYS_60@NZ	333653	0.0702	2.7945	156.704
GLU_416@OE2	LYS_383@HZ3	LYS_383@NZ	333473	0.0702	2.7696	158.191
GLU_356@OE2	GLY_353@H	GLY_353@N	333225	0.0702	2.8549	162.449
GLU_435@OE2	LYS_60@HZ3	LYS_60@NZ	333197	0.0701	2.794	156.666
ARG_434@O	ASN_437@H	ASN_437@N	333166	0.0701	2.9071	154.688
GLU_435@OE1	LYS_60@HZ2	LYS_60@NZ	332573	0.07	2.7944	156.639
THR_264@O	SER_143@HG	SER_143@OG	332201	0.0699	2.7467	162.211
ASP_86@OD2	ASN_177@HD22	ASN_177@ND2	331731	0.0698	2.823	160.975
GLU_416@OE1	LYS_383@HZ2	LYS_383@NZ	331650	0.0698	2.77	158.15
GLU_416@OE2	LYS_383@HZ2	LYS_383@NZ	331389	0.0698	2.7692	158.155
GLU_36@OE2	ARG_51@HH11	ARG_51@NH1	331357	0.0698	2.7932	157.752
GLU_166@OE2	ASN_347@HD22	ASN_347@ND2	331043	0.0697	2.8286	160.854
GLU_36@OE1	ARG_51@HH11	ARG_51@NH1	329426	0.0694	2.7933	157.689
GLU_435@OE1	LYS_60@HZ1	LYS_60@NZ	329065	0.0693	2.7943	156.682
ASN_340@O	SER_343@H	SER_343@N	327686	0.069	2.9035	155.813
SER_84@O	ASN_88@HD22	ASN_88@ND2	327606	0.069	2.8439	159.507
SER_343@O	ASN_347@HD22	ASN_347@ND2	327516	0.069	2.8334	159.388
ASN_340@OD1	ASN_81@HD22	ASN_81@ND2	326422	0.0687	2.8389	157.662
ASP_448@OD1	SER_402@HG	SER_402@OG	325935	0.0686	2.6881	163.072
ASP_190@OD2	TYR_193@H	TYR_193@N	325829	0.0686	2.8776	162.441
PRO_438@O	ILE_441@H	ILE_441@N	325453	0.0685	2.8875	146.658
GLU_435@OE1	LYS_60@HZ3	LYS_60@NZ	324798	0.0684	2.7948	156.719
GLU_132@OE1	ARG_194@HE	ARG_194@NE	324382	0.0683	2.8318	160.007
GLU_176@OE2	ARG_278@HH22	ARG_278@NH2	324055	0.0682	2.7995	157.438
GLU_64@OE1	VAL_65@H	VAL_65@N	323718	0.0682	2.8291	156.167
GLU_416@OE1	LYS_383@HZ1	LYS_383@NZ	323700	0.0681	2.77	158.178
GLU_135@OE1	SER_143@HG	SER_143@OG	322953	0.068	2.6708	163.589
SER_143@O	SER_262@H	SER_262@N	322892	0.068	2.8616	158.969
GLU_176@OE1	ARG_278@HH22	ARG_278@NH2	322385	0.0679	2.7995	157.486
ML1_259@O3	HIE_185@HE2	HIE_185@NE2	322249	0.0678	2.8782	148.607
ASP_334@OD1	ARG_278@HE	ARG_278@NE	321347	0.0677	2.8071	155.688
ASP_86@OD1	ASN_177@HD22	ASN_177@ND2	321049	0.0676	2.8221	160.697
GLU_394@O	SER_397@HG	SER_397@OG	320433	0.0675	2.717	161.232
GLU_36@OE2	GLU_36@H	GLU_36@N	320406	0.0675	2.8333	150.791
ASP_448@OD1	TYR_452@H	TYR_452@N	319864	0.0673	2.8399	153.412
GLU_416@O	HIE_419@H	HIE_419@N	319615	0.0673	2.8847	153.552
GLU_323@OE1	ARG_291@HH22	ARG_291@NH2	317641	0.0669	2.7953	159.713
GLY_329@O	ARG_291@HH21	ARG_291@NH2	317068	0.0668	2.8207	152.341
SER_77@O	THR_341@H	THR_341@N	315629	0.0664	2.8827	155.988
LEU_511@O	VAL_514@H	VAL_514@N	315103	0.0663	2.8988	156.429
ASN_108@OD1	LYS_217@HZ1	LYS_217@NZ	314651	0.0662	2.8164	152.604
ASP_189@O	ARG_194@HH21	ARG_194@NH2	313699	0.066	2.8498	147.666
ASN_108@OD1	LYS_217@HZ3	LYS_217@NZ	313193	0.0659	2.8168	152.582
ASP_448@O	ARG_453@HE	ARG_453@NE	312213	0.0657	2.8368	152.199
ASN_108@OD1	LYS_217@HZ2	LYS_217@NZ	312056	0.0657	2.8164	152.59
SER_336@O	SER_338@H	SER_338@N	311566	0.0656	2.8649	146.25
MET_408@O	TRP_431@HE1	TRP_431@NE1	311491	0.0656	2.8657	160.373
GLU_135@OE1	SER_139@HG	SER_139@OG	311091	0.0655	2.6608	164.812
ASN_178@OD1	ARG_278@HE	ARG_278@NE	308149	0.0649	2.881	148.941
ASP_345@OD1	TRP_433@HE1	TRP_433@NE1	307461	0.0647	2.8281	152.233
LEU_395@O	SER_450@HG	SER_450@OG	307105	0.0647	2.7354	160.886
GLU_272@OE1	ARG_268@HH22	ARG_268@NH2	306599	0.0645	2.7854	158.489
CYS_90@O	ASP_92@H	ASP_92@N	306541	0.0645	2.8949	147.569
ASP_189@OD2	GLY_142@H	GLY_142@N	306417	0.0645	2.8471	161.263
ALA_69@O	TYR_72@HH	TYR_72@OH	306286	0.0645	2.7478	162.946
SER_265@OG	GLN_267@H	GLN_267@N	305539	0.0643	2.9145	154.203
ASN_81@O	TRP_174@HE1	TRP_174@NE1	303783	0.064	2.8554	156.559
ASP_190@OD2	SER_191@HG	SER_191@OG	302505	0.0637	2.715	164.709
GLY_61@O	ASN_76@HD22	ASN_76@ND2	302290	0.0636	2.8439	159.77
ASP_345@OD1	ASN_436@HD21	ASN_436@ND2	302275	0.0636	2.8248	161.748
ASN_350@O	ALA_352@H	ALA_352@N	301497	0.0635	2.8114	146.579
ASP_83@OD2	SER_336@HG	SER_336@OG	301140	0.0634	2.7075	161.878
LEU_33@O	ILE_71@H	ILE_71@N	300602	0.0633	2.8777	154.462
ASP_448@O	ARG_453@HH21	ARG_453@NH2	300227	0.0632	2.8258	149.508
GLN_100@O	LEU_104@H	LEU_104@N	300219	0.0632	2.923	156.892
ASP_459@OD2	ASN_485@HD21	ASN_485@ND2	299300	0.063	2.8377	159.549
ASN_177@OD1	ASN_340@HD21	ASN_340@ND2	299129	0.063	2.8571	160.023
ASN_226@O	TRP_197@HE1	TRP_197@NE1	298505	0.0628	2.8895	157.873
ML1_259@O2	ARG_194@HH11	ARG_194@NH1	298047	0.0627	2.8594	149.891
ASP_190@OD1	SER_191@HG	SER_191@OG	298003	0.0627	2.7156	164.668
ALA_328@O	ARG_291@HE	ARG_291@NE	297497	0.0626	2.8535	151.423
GLU_64@OE2	ARG_66@H	ARG_66@N	297091	0.0625	2.8799	163.337
GLU_404@OE1	GLU_404@H	GLU_404@N	297064	0.0625	2.8196	149.693
GLU_391@OE2	ML1_518@H6	ML1_518@O2	295079	0.0621	2.7095	165.382
ASP_345@OD2	GLN_432@HE21	GLN_432@NE2	293592	0.0618	2.8252	162.897
HIE_187@ND1	TYR_241@HH	TYR_241@OH	291954	0.0615	2.8426	159.13
GLU_135@O	ALA_140@H	ALA_140@N	291351	0.0613	2.8886	159.189
VAL_65@O	ARG_67@HH11	ARG_67@NH1	291315	0.0613	2.7944	153.367
GLU_135@OE2	SER_139@HG	SER_139@OG	290328	0.0611	2.6578	164.988
LEU_188@O	SER_143@HG	SER_143@OG	290068	0.0611	2.7059	160.787
HIE_419@O	LYS_254@HZ2	LYS_254@NZ	289148	0.0609	2.8135	153.244
HIE_419@O	LYS_254@HZ1	LYS_254@NZ	288945	0.0608	2.8133	153.226
ALA_299@O	ASP_303@H	ASP_303@N	287971	0.0606	2.8632	142.764
HIE_419@O	LYS_254@HZ3	LYS_254@NZ	287728	0.0606	2.8133	153.257
GLY_337@O	ASN_340@H	ASN_340@N	286431	0.0603	2.9022	158.126
ASP_449@OD2	LEU_451@H	LEU_451@N	286150	0.0602	2.8908	161.344
ASP_279@OD2	ASN_91@HD21	ASN_91@ND2	285224	0.06	2.8201	159.552
LYS_319@O	GLN_173@HE21	GLN_173@NE2	284734	0.0599	2.8485	158.99
GLN_432@OE1	GLN_429@HE21	GLN_429@NE2	284121	0.0598	2.8637	150.455
ILE_414@O	ALA_417@H	ALA_417@N	283174	0.0596	2.9107	146.702
ASP_459@OD1	ASN_485@HD21	ASN_485@ND2	283004	0.0596	2.8375	160.177
PHE_501@O	LEU_505@H	LEU_505@N	282665	0.0595	2.8467	152.894
GLU_404@OE2	GLU_404@H	GLU_404@N	282392	0.0595	2.8157	149.993
ALA_140@O	SER_143@H	SER_143@N	281234	0.0592	2.8848	147.917
GLN_100@OE1	LYS_228@HZ1	LYS_228@NZ	280689	0.0591	2.8105	150.552
GLN_100@OE1	LYS_228@HZ3	LYS_228@NZ	280631	0.0591	2.8103	150.579
ASP_449@OD1	LEU_451@H	LEU_451@N	280597	0.0591	2.8912	161.295
ALA_266@O	ARG_268@H	ARG_268@N	279794	0.0589	2.8741	147.149
GLN_173@OE1	ASN_340@HD22	ASN_340@ND2	279441	0.0588	2.8381	161.367
GLN_12@OE1	ARG_9@HE	ARG_9@NE	277846	0.0585	2.8359	153.845
GLU_135@OE2	SER_143@HG	SER_143@OG	277628	0.0584	2.6714	163.462
GLU_300@O	ASP_303@H	ASP_303@N	276688	0.0583	2.9108	147.799
GLN_100@OE1	LYS_228@HZ2	LYS_228@NZ	276046	0.0581	2.8104	150.533
ILE_155@O	ALA_158@H	ALA_158@N	275985	0.0581	2.9126	146.903
GLY_78@O	ASN_340@HD22	ASN_340@ND2	275826	0.0581	2.8636	162.736
ALA_69@O	ARG_32@HH11	ARG_32@NH1	275653	0.058	2.8364	156.376
GLN_339@O	SER_343@H	SER_343@N	275605	0.058	2.8701	155.418
GLU_394@OE1	SER_397@HG	SER_397@OG	275346	0.058	2.6906	161.816
LYS_513@O	GLN_359@HE21	GLN_359@NE2	274588	0.0578	2.8536	158.513
ASN_76@OD1	SER_79@HG	SER_79@OG	274084	0.0577	2.724	160.785
GLU_58@OE1	ARG_67@HH12	ARG_67@NH1	274060	0.0577	2.8102	155.686
ASP_515@OD1	GLN_359@HE22	GLN_359@NE2	274031	0.0577	2.8128	162.901
GLU_176@OE1	ARG_268@HH12	ARG_268@NH1	273624	0.0576	2.7909	161.347
GLU_394@OE2	SER_397@HG	SER_397@OG	273173	0.0575	2.6889	161.891
GLU_176@OE2	ARG_268@HH12	ARG_268@NH1	273156	0.0575	2.7938	160.888
LEU_390@O	LEU_395@H	LEU_395@N	273092	0.0575	2.8727	159.902
LEU_188@O	ARG_194@HE	ARG_194@NE	273031	0.0575	2.8273	155.905
GLN_339@OE1	GLN_339@H	GLN_339@N	272793	0.0574	2.8365	148.346
ASN_287@OD1	GLY_289@H	GLY_289@N	272181	0.0573	2.8786	154.522
ILE_109@O	PHE_112@H	PHE_112@N	272117	0.0573	2.8982	144.369
ASP_345@OD2	ASN_436@HD21	ASN_436@ND2	271224	0.0571	2.8223	161.885
PRO_85@O	ASN_88@H	ASN_88@N	271178	0.0571	2.8912	150.652
ASP_342@OD2	SER_79@H	SER_79@N	270804	0.057	2.8083	157.681
GLU_295@OE2	GLU_295@H	GLU_295@N	270748	0.057	2.8327	150.936
GLU_132@OE2	ARG_194@HE	ARG_194@NE	270705	0.057	2.8337	160.329
ASP_190@OD2	ARG_230@HH22	ARG_230@NH2	268516	0.0565	2.8193	157.992
GLU_176@OE2	ARG_268@HH22	ARG_268@NH2	267779	0.0564	2.8111	158.98
THR_377@OG1	ASP_380@H	ASP_380@N	267550	0.0563	2.9221	153.063
GLN_80@O	SER_84@HG	SER_84@OG	267540	0.0563	2.721	160.673
GLN_80@OE1	GLN_80@H	GLN_80@N	267283	0.0563	2.8529	147.9
GLU_135@OE2	SER_138@HG	SER_138@OG	266698	0.0561	2.673	163.824
THR_118@OG1	ASP_121@H	ASP_121@N	266538	0.0561	2.922	153.041
ASP_83@OD2	THR_82@HG1	THR_82@OG1	266500	0.0561	2.7483	159.238
ASP_334@OD2	SER_336@H	SER_336@N	266491	0.0561	2.8717	156.007
ASP_83@OD2	ARG_278@HH22	ARG_278@NH2	266384	0.0561	2.7933	157.999
ASP_83@OD1	SER_336@H	SER_336@N	266003	0.056	2.8527	160.798
ASP_515@OD2	GLN_359@HE22	GLN_359@NE2	265926	0.056	2.8139	162.705
GLN_8@OE1	THR_46@H	THR_46@N	265826	0.056	2.868	159.69
ASP_345@OD1	GLN_429@HE21	GLN_429@NE2	265235	0.0558	2.8293	156.282
ASP_83@OD2	SER_336@H	SER_336@N	265088	0.0558	2.8521	160.78
ALA_263@O	THR_264@HG1	THR_264@OG1	264996	0.0558	2.7377	157.685
THR_82@O	ASP_86@H	ASP_86@N	264522	0.0557	2.8836	156.372
SER_77@OG	THR_341@HG1	THR_341@OG1	264452	0.0557	2.8088	160.147
GLU_295@OE2	ARG_310@HH11	ARG_310@NH1	263880	0.0556	2.7958	157.641
ASP_189@OD2	TYR_193@H	TYR_193@N	263671	0.0555	2.8033	151.882
GLN_100@O	GLN_100@HE22	GLN_100@NE2	263442	0.0555	2.8617	149.655
GLN_362@OE1	TRP_509@HE1	TRP_509@NE1	262983	0.0554	2.8519	148.72
GLU_295@OE1	ARG_310@HH11	ARG_310@NH1	262948	0.0554	2.7955	157.549
GLU_295@OE1	GLU_295@H	GLU_295@N	262232	0.0552	2.8335	150.819
GLU_404@O	AP1_407@H	AP1_407@N	262003	0.0552	2.8736	147.003
GLU_391@O	GLU_394@H	GLU_394@N	262001	0.0552	2.8922	147.605
SER_146@O	GLN_150@HE22	GLN_150@NE2	261677	0.0551	2.8626	158.293
ALA_140@O	SER_143@HG	SER_143@OG	261531	0.0551	2.7437	159.48
GLU_132@O	GLU_135@H	GLU_135@N	261334	0.055	2.8954	149.306
ILE_282@O	SER_84@HG	SER_84@OG	261157	0.055	2.7244	162.492
ASP_448@O	LYS_2@H	LYS_2@N	260398	0.0548	2.8416	155.224
VAL_514@O	GLN_116@HE21	GLN_116@NE2	259673	0.0547	2.8549	153.859
ASN_340@O	SER_343@HG	SER_343@OG	259628	0.0547	2.736	161.656
GLU_404@OE2	ML1_518@H7	ML1_518@O3	259469	0.0546	2.708	157.829
ASP_86@OD2	ASN_178@HD21	ASN_178@ND2	258801	0.0545	2.8366	160.075
GLU_290@OE2	ASN_287@HD22	ASN_287@ND2	258682	0.0545	2.8304	162.046
ASP_75@O	GLY_78@H	GLY_78@N	257764	0.0543	2.8822	158.041
GLU_323@OE2	ARG_291@HH11	ARG_291@NH1	257219	0.0542	2.8022	160.939
GLU_64@OE1	ARG_67@HH21	ARG_67@NH2	256591	0.054	2.8051	153.387
SER_403@O	ARG_453@HH12	ARG_453@NH1	256508	0.054	2.8437	151.972
ASN_226@O	TYR_193@HH	TYR_193@OH	255744	0.0538	2.785	160.932
ARG_393@O	SER_397@H	SER_397@N	255106	0.0537	2.8795	155.214
SER_162@OG	ASN_347@HD21	ASN_347@ND2	254515	0.0536	2.8959	160.316
GLU_132@OE1	SER_139@HG	SER_139@OG	254317	0.0535	2.678	163.566
GLU_132@OE2	SER_139@HG	SER_139@OG	253781	0.0534	2.6736	163.374
GLU_176@OE2	ARG_278@HH12	ARG_278@NH1	253056	0.0533	2.8188	156.206
GLU_492@OE1	TYR_452@HH	TYR_452@OH	252109	0.0531	2.7146	161.717
ASP_279@OD1	ASN_91@HD21	ASN_91@ND2	251600	0.053	2.8209	159.512
ASN_88@OD1	SER_421@HG	SER_421@OG	251517	0.053	2.7332	160.293
LEU_136@O	SER_139@HG	SER_139@OG	251307	0.0529	2.7341	160.422
GLU_132@OE2	SER_138@HG	SER_138@OG	251115	0.0529	2.6706	163.339
ASP_86@OD1	ASN_178@HD21	ASN_178@ND2	250670	0.0528	2.8377	160.018
GLU_176@OE1	ARG_268@HH22	ARG_268@NH2	250554	0.0527	2.8097	159.206
ASN_226@OD1	TYR_193@HH	TYR_193@OH	250321	0.0527	2.7569	158.625
GLU_41@O	ASP_44@H	ASP_44@N	250236	0.0527	2.911	147.691
ASN_436@O	ARG_19@HH22	ARG_19@NH2	249196	0.0525	2.8373	152.278
GLU_391@O	SER_402@HG	SER_402@OG	249173	0.0525	2.6916	162.647
GLU_176@OE1	ARG_278@HH12	ARG_278@NH1	247979	0.0522	2.8189	156.08
LEU_333@O	GLY_337@H	GLY_337@N	247652	0.0521	2.8612	156.981
GLU_58@OE2	ARG_67@HH12	ARG_67@NH1	247459	0.0521	2.8137	155.584
GLU_290@OE1	ASN_287@HD22	ASN_287@ND2	247415	0.0521	2.8309	162.016
LEU_184@O	HIE_187@H	HIE_187@N	247318	0.0521	2.9035	150.091
LEU_333@O	SER_336@HG	SER_336@OG	247304	0.0521	2.7237	161.263
GLN_429@OE1	ASN_81@HD21	ASN_81@ND2	247275	0.0521	2.8246	152.846
GLU_31@OE2	ASN_28@HD22	ASN_28@ND2	246712	0.0519	2.8323	161.539
ASP_448@OD1	SER_450@H	SER_450@N	246338	0.0519	2.8931	158.96
ALA_399@O	ARG_453@HH22	ARG_453@NH2	246306	0.0519	2.8168	155.495
SER_265@O	GLN_267@H	GLN_267@N	245656	0.0517	2.8511	146.876
ILE_281@O	THR_284@H	THR_284@N	245646	0.0517	2.903	150.215
PRO_344@O	TRP_433@HE1	TRP_433@NE1	245616	0.0517	2.8734	159.497
GLN_432@O	GLU_435@H	GLU_435@N	245604	0.0517	2.8942	148.918
GLU_135@OE1	SER_138@HG	SER_138@OG	245497	0.0517	2.6742	163.631
ASN_81@OD1	THR_341@HG1	THR_341@OG1	245253	0.0516	2.7107	161.624
GLU_492@OE2	TYR_452@HH	TYR_452@OH	245107	0.0516	2.7151	161.679
GLU_365@OE1	TRP_431@HE1	TRP_431@NE1	244730	0.0515	2.8556	156.631
GLU_31@OE1	ASN_28@HD22	ASN_28@ND2	243118	0.0512	2.8324	161.314
GLU_323@OE1	ARG_326@H	ARG_326@N	242149	0.051	2.8384	161.587
GLU_176@OE2	LYS_319@HZ1	LYS_319@NZ	241956	0.0509	2.7799	157.155
PRO_438@O	GLN_442@HE22	GLN_442@NE2	241626	0.0509	2.8587	160.6
GLY_353@O	GLU_356@H	GLU_356@N	240763	0.0507	2.9066	151.357
GLY_337@O	THR_82@H	THR_82@N	240741	0.0507	2.8466	157.819
GLY_94@O	GLU_97@H	GLU_97@N	240426	0.0506	2.8978	148.163
THR_341@O	TRP_433@HE1	TRP_433@NE1	240345	0.0506	2.8444	159.585
GLU_176@OE2	LYS_319@HZ3	LYS_319@NZ	239251	0.0504	2.7792	157.11
GLU_176@OE2	LYS_319@HZ2	LYS_319@NZ	238756	0.0503	2.7804	157.147
ASP_448@OD1	ASP_449@H	ASP_449@N	238301	0.0502	2.8182	144.613
ASP_189@OD2	LEU_192@H	LEU_192@N	238202	0.0501	2.8589	152.935
ASP_83@OD2	ASN_335@HD22	ASN_335@ND2	238053	0.0501	2.8311	163.617
ARG_67@O	ALA_69@H	ALA_69@N	237950	0.0501	2.8531	146.874
GLN_339@OE1	ASN_177@HD21	ASN_177@ND2	236367	0.0498	2.8554	162.819
THR_82@OG1	SER_338@HG	SER_338@OG	235165	0.0495	2.8004	157.502
ASP_448@OD2	SER_403@HG	SER_403@OG	234079	0.0493	2.6841	163.945
ASN_178@OD1	LYS_319@HZ2	LYS_319@NZ	233903	0.0492	2.8016	154.804
ASN_81@OD1	GLN_429@HE21	GLN_429@NE2	233752	0.0492	2.8566	160.561
GLN_389@O	GLU_392@H	GLU_392@N	233406	0.0491	2.8938	152.975
TYR_27@O	SER_338@HG	SER_338@OG	233247	0.0491	2.7167	162.11
ALA_352@O	TRP_440@HE1	TRP_440@NE1	232871	0.049	2.8478	157.008
ASP_190@OD1	TYR_193@H	TYR_193@N	232165	0.0489	2.8778	162.188
GLU_176@OE1	ARG_175@HH22	ARG_175@NH2	230917	0.0486	2.7838	153.638
ASN_340@OD1	ASN_177@HD21	ASN_177@ND2	230380	0.0485	2.8661	162.619
ASP_83@OD1	ARG_278@HH22	ARG_278@NH2	230140	0.0485	2.7931	156.669
ASN_76@OD1	GLN_339@H	GLN_339@N	230019	0.0484	2.8727	156.321
GLU_233@O	VAL_237@H	VAL_237@N	229625	0.0483	2.8886	153.192
ASP_75@O	SER_338@H	SER_338@N	229309	0.0483	2.8745	158.07
ASN_178@OD1	LYS_319@HZ1	LYS_319@NZ	227827	0.048	2.8007	154.806
LEU_390@O	ARG_393@H	ARG_393@N	227799	0.048	2.8958	149.395
GLU_392@OE2	LYS_461@HZ2	LYS_461@NZ	227653	0.0479	2.7939	156.945
GLU_356@OE1	ASN_350@HD22	ASN_350@ND2	227320	0.0479	2.8077	159.755
LEU_395@O	SER_398@H	SER_398@N	227219	0.0478	2.8887	151.496
TRP_433@O	ASN_436@H	ASN_436@N	226971	0.0478	2.9109	152.172
ALA_266@O	THR_305@H	THR_305@N	226714	0.0477	2.8835	158.321
SER_144@OG	ML1_259@H8	ML1_259@O4	226547	0.0477	2.8211	149.235
GLU_392@OE2	LYS_461@HZ3	LYS_461@NZ	226281	0.0476	2.7936	156.944
GLU_135@OE1	ARG_194@HH22	ARG_194@NH2	226232	0.0476	2.7824	158.359
LEU_74@O	SER_77@H	SER_77@N	226204	0.0476	2.9071	157.799
TRP_197@O	ASP_200@H	ASP_200@N	226193	0.0476	2.8916	144.385
GLU_196@O	GLY_199@H	GLY_199@N	225993	0.0476	2.8762	142.877
ALA_140@O	SER_144@HG	SER_144@OG	224905	0.0473	2.775	160.816
SER_336@O	SER_79@HG	SER_79@OG	224542	0.0473	2.7224	160.003
GLU_392@OE2	LYS_461@HZ1	LYS_461@NZ	224324	0.0472	2.7935	156.973
HIE_185@ND1	TYR_245@HH	TYR_245@OH	224271	0.0472	2.8571	159.55
GLU_392@OE1	LYS_461@HZ2	LYS_461@NZ	224123	0.0472	2.7937	156.875
ASN_347@OD1	CYS_349@H	CYS_349@N	223665	0.0471	2.8811	153.952
SER_403@OG	ARG_453@HH11	ARG_453@NH1	223619	0.0471	2.8651	153.369
ASP_83@OD1	THR_82@HG1	THR_82@OG1	223495	0.0471	2.7456	159.246
GLN_389@O	GLU_394@H	GLU_394@N	223417	0.047	2.8633	162.961
GLU_64@OE1	ARG_67@HE	ARG_67@NE	222825	0.0469	2.8234	154.916
GLN_339@O	ASP_342@H	ASP_342@N	222710	0.0469	2.8947	153.226
GLN_170@OE1	GLN_429@HE22	GLN_429@NE2	222564	0.0469	2.8346	157.051
ASN_91@O	ALA_93@H	ALA_93@N	222400	0.0468	2.8373	146.864
ALA_399@O	SER_402@H	SER_402@N	222034	0.0467	2.8996	152.428
PRO_510@O	VAL_514@H	VAL_514@N	221995	0.0467	2.8705	157.335
GLU_392@OE1	LYS_461@HZ1	LYS_461@NZ	221438	0.0466	2.7934	156.921
PHE_427@O	SER_430@HG	SER_430@OG	221096	0.0465	2.732	159.978
THR_341@O	GLN_170@HE21	GLN_170@NE2	220573	0.0464	2.8664	158.438
SER_262@O	ALA_266@H	ALA_266@N	220547	0.0464	2.872	153.586
ASN_437@O	GLN_442@HE21	GLN_442@NE2	220533	0.0464	2.8427	160.748
LEU_74@O	ASN_76@H	ASN_76@N	220423	0.0464	2.8753	146.525
ARG_428@O	GLN_432@HE22	GLN_432@NE2	220311	0.0464	2.8644	158.587
TRP_431@O	ARG_434@H	ARG_434@N	220109	0.0463	2.8941	145.718
GLU_176@OE1	LYS_319@HZ2	LYS_319@NZ	219819	0.0463	2.7814	157.105
LEU_57@O	VAL_63@H	VAL_63@N	219818	0.0463	2.9136	157.868
GLU_145@OE1	ML1_259@H7	ML1_259@O3	219707	0.0463	2.7108	157.66
GLN_442@OE1	GLN_442@H	GLN_442@N	219532	0.0462	2.806	147.74
LEU_333@O	SER_336@H	SER_336@N	219492	0.0462	2.8875	154.364
GLU_392@OE1	LYS_461@HZ3	LYS_461@NZ	219246	0.0462	2.7941	156.942
GLU_176@OE1	LYS_319@HZ3	LYS_319@NZ	218611	0.046	2.7814	157.137
GLU_404@OE1	ML1_518@H7	ML1_518@O3	218508	0.046	2.7057	157.757
GLU_145@OE2	ML1_259@H7	ML1_259@O3	218351	0.046	2.7114	157.747
GLU_176@OE1	LYS_319@HZ1	LYS_319@NZ	218148	0.0459	2.7815	157.101
GLU_120@OE2	GLU_120@H	GLU_120@N	218035	0.0459	2.8429	146.18
GLU_135@OE2	ARG_194@HH22	ARG_194@NH2	217929	0.0459	2.7818	158.372
PRO_26@O	ASN_28@HD22	ASN_28@ND2	217705	0.0458	2.8531	159.611
TYR_504@O	PHE_506@H	PHE_506@N	217173	0.0457	2.8349	146.934
GLU_58@OE1	ARG_67@HH22	ARG_67@NH2	217014	0.0457	2.8126	156.521
ASP_448@OD1	SER_403@HG	SER_403@OG	216639	0.0456	2.6867	163.841
GLU_135@O	SER_139@HG	SER_139@OG	216478	0.0456	2.7467	161.708
ASP_345@OD1	GLN_432@HE22	GLN_432@NE2	216446	0.0456	2.8226	161.799
GLU_120@OE1	GLU_120@H	GLU_120@N	216308	0.0455	2.8426	146.151
GLU_13@OE1	GLN_442@HE22	GLN_442@NE2	216297	0.0455	2.8201	159.876
GLU_13@OE2	GLN_442@HE22	GLN_442@NE2	216259	0.0455	2.8209	159.895
PRO_85@O	CYS_90@H	CYS_90@N	215515	0.0454	2.8737	157.486
GLU_233@OE1	TYR_193@HH	TYR_193@OH	215394	0.0453	2.7109	162.561
ASN_76@OD1	GLY_78@H	GLY_78@N	214352	0.0451	2.8875	156.186
ALA_266@O	GLN_271@HE21	GLN_271@NE2	213227	0.0449	2.8425	157.804
GLU_323@OE2	ARG_326@HE	ARG_326@NE	213148	0.0449	2.8019	153.402
ALA_328@O	ARG_291@HH21	ARG_291@NH2	213100	0.0449	2.8283	151.978
ASN_178@OD1	LYS_319@HZ3	LYS_319@NZ	212958	0.0448	2.8017	155.06
GLU_64@OE1	ARG_66@H	ARG_66@N	212839	0.0448	2.8869	163.874
GLU_233@OE2	TYR_193@HH	TYR_193@OH	212117	0.0447	2.712	162.598
ASP_380@OD1	HIE_419@HE2	HIE_419@NE2	212098	0.0447	2.8317	159.77
ILE_22@O	THR_25@H	THR_25@N	212050	0.0446	2.8995	149.94
GLU_132@OE1	SER_138@HG	SER_138@OG	211951	0.0446	2.6734	162.968
ILE_368@O	PHE_371@H	PHE_371@N	211608	0.0445	2.9002	144.423
GLY_78@O	ASN_81@HD22	ASN_81@ND2	211093	0.0444	2.8415	158.867
ASP_345@OD2	GLN_429@HE21	GLN_429@NE2	210783	0.0444	2.8276	159.304
AP1_148@O	PHE_151@H	PHE_151@N	210531	0.0443	2.882	143.648
GLU_290@O	ASN_335@HD22	ASN_335@ND2	210519	0.0443	2.851	159.737
ALA_346@O	CYS_349@H	CYS_349@N	210377	0.0443	2.8992	151.733
GLU_379@OE2	GLU_379@H	GLU_379@N	209901	0.0442	2.8414	146.253
TRP_509@O	ASP_512@H	ASP_512@N	208211	0.0438	2.8877	152.865
GLN_442@OE1	GLN_12@HE21	GLN_12@NE2	208107	0.0438	2.8359	162.663
THR_418@O	GLN_375@HE22	GLN_375@NE2	207950	0.0438	2.8527	161.359
ASP_189@O	SER_143@H	SER_143@N	207776	0.0437	2.8713	154.543
PRO_285@O	ASN_287@H	ASN_287@N	207668	0.0437	2.8635	146.37
GLU_272@OE1	SER_265@H	SER_265@N	206612	0.0435	2.8522	159.573
LEU_316@O	VAL_322@H	VAL_322@N	206422	0.0435	2.9165	158.058
ML1_518@O3	HIE_444@HE2	HIE_444@NE2	206190	0.0434	2.8773	147.014
ALA_69@O	ARG_32@HH12	ARG_32@NH1	205442	0.0433	2.832	156.55
GLU_379@OE1	GLU_379@H	GLU_379@N	204949	0.0431	2.8425	146.057
GLN_116@O	HIE_160@HE2	HIE_160@NE2	204793	0.0431	2.8624	146.877
ARG_66@O	ARG_32@HH22	ARG_32@NH2	204538	0.0431	2.8255	153.681
ASP_515@OD1	LYS_487@HZ2	LYS_487@NZ	204259	0.043	2.8071	154.274
ASN_485@OD1	TYR_452@HH	TYR_452@OH	203882	0.0429	2.7568	159.865
SER_338@O	ASN_340@H	ASN_340@N	203843	0.0429	2.869	146.765
GLN_375@O	HIE_419@HE2	HIE_419@NE2	203216	0.0428	2.8579	147.859
SER_402@OG	ARG_453@HH12	ARG_453@NH1	201629	0.0424	2.8485	152.284
LEU_395@O	ARG_453@HH11	ARG_453@NH1	201114	0.0423	2.8275	156.291
GLU_394@OE1	SER_403@H	SER_403@N	200999	0.0423	2.8587	160.654
PHE_501@O	ASP_507@H	ASP_507@N	200752	0.0423	2.9041	153.23
GLY_61@O	SER_77@H	SER_77@N	200749	0.0423	2.8704	151.806
GLU_272@OE2	ARG_268@HH22	ARG_268@NH2	200478	0.0422	2.7878	157.472
ASP_75@OD2	ARG_325@HH22	ARG_325@NH2	200188	0.0421	2.8109	158.849
ASP_380@OD2	HIE_419@HE2	HIE_419@NE2	199823	0.0421	2.828	160.005
GLU_64@OE2	ARG_67@HH21	ARG_67@NH2	199734	0.042	2.8068	154.574
ASP_342@OD2	GLN_80@H	GLN_80@N	199720	0.042	2.8772	164.118
GLN_80@O	ASP_83@H	ASP_83@N	198997	0.0419	2.893	152.839
GLY_199@O	GLN_203@HE22	GLN_203@NE2	198887	0.0419	2.8592	159.1
ML1_259@O2	ARG_194@HH12	ARG_194@NH1	198786	0.0418	2.8616	149.833
ASP_515@OD1	LYS_487@HZ3	LYS_487@NZ	197691	0.0416	2.8066	154.279
ASN_335@O	SER_338@H	SER_338@N	197456	0.0416	2.9019	153.864
GLN_173@O	GLU_176@H	GLU_176@N	197330	0.0415	2.8845	146.557
SER_162@O	VAL_165@H	VAL_165@N	196973	0.0415	2.9008	144.296
GLY_142@O	ARG_194@HH12	ARG_194@NH1	196930	0.0415	2.8228	151.382
ASP_75@OD1	TYR_331@HH	TYR_331@OH	196881	0.0414	2.691	162.027
GLY_320@O	GLN_339@HE22	GLN_339@NE2	195450	0.0411	2.852	159.892
ASP_342@OD2	SER_77@HG	SER_77@OG	194915	0.041	2.6759	163.73
SER_403@OG	ML1_518@H8	ML1_518@O4	194768	0.041	2.8207	152.433
ASP_515@OD2	LYS_487@HZ3	LYS_487@NZ	194132	0.0409	2.807	154.14
GLU_317@OE2	ARG_325@HH21	ARG_325@NH2	193812	0.0408	2.7924	155.806
LYS_254@O	GLN_375@HE21	GLN_375@NE2	193557	0.0407	2.8519	156.627
ARG_67@O	ARG_32@HH12	ARG_32@NH1	193164	0.0407	2.842	150.849
GLN_442@OE1	TYR_11@HH	TYR_11@OH	193130	0.0407	2.7222	163.943
GLN_339@O	ASN_76@HD22	ASN_76@ND2	193058	0.0406	2.8518	159.547
GLU_323@O	ARG_325@H	ARG_325@N	192992	0.0406	2.8736	146.49
ML1_259@O4	ARG_194@HH11	ARG_194@NH1	192860	0.0406	2.8862	154.419
ASP_342@OD1	SER_77@HG	SER_77@OG	192817	0.0406	2.678	164.207
ARG_326@O	ALA_328@H	ALA_328@N	192578	0.0405	2.8584	146.657
ASP_345@OD1	SER_79@HG	SER_79@OG	192280	0.0405	2.6721	164.155
ASN_81@OD1	GLN_432@HE21	GLN_432@NE2	192082	0.0404	2.8618	160.92
ASP_75@OD2	ARG_325@HH12	ARG_325@NH1	192021	0.0404	2.8169	157.514
GLN_12@OE1	ARG_9@HH21	ARG_9@NH2	191791	0.0404	2.8293	149.548
ASP_515@OD2	LYS_487@HZ2	LYS_487@NZ	191784	0.0404	2.808	153.874
ASP_515@OD1	LYS_487@HZ1	LYS_487@NZ	191677	0.0404	2.8074	154.258
GLY_147@O	GLN_150@HE21	GLN_150@NE2	191282	0.0403	2.8383	161.429
GLU_176@OE1	ARG_175@HH21	ARG_175@NH2	191220	0.0403	2.7859	154.123
ASP_256@OD1	GLN_100@HE22	GLN_100@NE2	191130	0.0402	2.818	162.855
GLY_142@O	ARG_194@HH22	ARG_194@NH2	191049	0.0402	2.8224	150.975
GLU_58@OE2	ARG_67@HH22	ARG_67@NH2	191037	0.0402	2.8125	157.122
THR_82@OG1	GLN_339@H	GLN_339@N	190732	0.0402	2.8869	159.709
LEU_188@O	ASP_190@H	ASP_190@N	190358	0.0401	2.849	147.211
ASP_448@OD2	SER_402@HG	SER_402@OG	189941	0.04	2.6821	162.368
GLU_323@OE2	ARG_326@HH21	ARG_326@NH2	189676	0.0399	2.8068	149.461
ASP_512@OD2	LYS_513@H	LYS_513@N	189392	0.0399	2.8358	146.488
ILE_441@O	HIE_444@H	HIE_444@N	189314	0.0399	2.8977	153.113
GLU_135@OE1	SER_262@HG	SER_262@OG	189085	0.0398	2.6789	161.906
LEU_363@O	ASN_367@H	ASN_367@N	188881	0.0398	2.918	157.234
ASP_189@OD2	ASP_190@H	ASP_190@N	188759	0.0397	2.8348	142.632
ARG_134@O	ALA_137@H	ALA_137@N	188529	0.0397	2.8934	148.413
ALA_516@O	ARG_214@HH21	ARG_214@NH2	188333	0.0396	2.8023	156.725
THR_5@O	GLN_442@HE22	GLN_442@NE2	187838	0.0395	2.8546	161.605
GLU_356@OE2	LYS_513@HZ3	LYS_513@NZ	187342	0.0394	2.7972	154.468
GLU_317@OE1	ARG_325@HH21	ARG_325@NH2	186966	0.0394	2.7896	156.069
GLU_300@OE1	ARG_296@HH11	ARG_296@NH1	186638	0.0393	2.8082	157.494
GLU_356@OE2	LYS_513@HZ2	LYS_513@NZ	186332	0.0392	2.797	154.583
ASP_75@OD2	TYR_331@HH	TYR_331@OH	186173	0.0392	2.6989	161.688
ARG_385@O	LEU_388@H	LEU_388@N	185936	0.0391	2.8997	146.299
GLU_166@OE1	GLN_170@HE22	GLN_170@NE2	185751	0.0391	2.8196	161.367
GLU_135@OE2	SER_262@HG	SER_262@OG	185732	0.0391	2.678	161.898
SER_79@O	ASN_335@HD22	ASN_335@ND2	185136	0.039	2.8297	161.784
GLU_356@OE2	LYS_513@HZ1	LYS_513@NZ	184896	0.0389	2.7973	154.493
AP1_407@O	PHE_410@H	PHE_410@N	184828	0.0389	2.8957	142.334
ASP_238@OD1	HIE_187@HE2	HIE_187@NE2	184535	0.0388	2.8164	160.962
ASP_515@OD2	LYS_487@HZ1	LYS_487@NZ	183829	0.0387	2.8075	153.971
ASP_189@OD2	ARG_194@H	ARG_194@N	182895	0.0385	2.8706	160.823
ASN_76@O	SER_79@H	SER_79@N	182335	0.0384	2.9067	155.253
SER_445@O	ARG_453@HH22	ARG_453@NH2	181881	0.0383	2.8221	151.763
GLU_300@OE2	ARG_296@HH11	ARG_296@NH1	181694	0.0383	2.8083	157.373
GLU_356@OE1	LYS_513@HZ3	LYS_513@NZ	181681	0.0382	2.8036	155.19
ASP_256@OD2	GLN_100@HE22	GLN_100@NE2	181139	0.0381	2.818	162.774
ASP_75@OD1	SER_336@HG	SER_336@OG	180888	0.0381	2.674	162.337
SER_421@O	VAL_424@H	VAL_424@N	180839	0.0381	2.8999	144.344
ASP_345@OD2	GLN_432@HE22	GLN_432@NE2	180790	0.0381	2.823	161.599
ASN_340@O	ASN_81@HD22	ASN_81@ND2	180310	0.038	2.8659	159.12
GLU_272@OE1	SER_265@HG	SER_265@OG	179724	0.0378	2.7208	164.192
ASP_75@OD1	ARG_325@HH12	ARG_325@NH1	179553	0.0378	2.8175	157.819
ALA_263@O	SER_146@HG	SER_146@OG	179044	0.0377	2.7187	158.556
GLN_8@OE1	THR_46@HG1	THR_46@OG1	178815	0.0376	2.7531	161.984
GLU_394@OE2	SER_403@H	SER_403@N	178670	0.0376	2.8578	160.687
ASP_238@OD2	HIE_187@HE2	HIE_187@NE2	178511	0.0376	2.8157	160.904
GLU_356@OE1	LYS_513@HZ1	LYS_513@NZ	177970	0.0375	2.8036	155.163
ASP_83@O	ASP_86@H	ASP_86@N	177720	0.0374	2.895	145.421
GLY_458@O	GLN_462@HE22	GLN_462@NE2	177715	0.0374	2.8599	158.983
ARG_169@O	ASN_340@HD21	ASN_340@ND2	177699	0.0374	2.8684	158.215
ASP_75@OD1	ARG_325@HH22	ARG_325@NH2	177696	0.0374	2.8127	159.225
LEU_447@O	ARG_453@HE	ARG_453@NE	177687	0.0374	2.8269	153.29
ASN_177@OD1	GLN_339@HE21	GLN_339@NE2	177475	0.0374	2.8696	161.245
PHE_506@O	TRP_509@H	TRP_509@N	177236	0.0373	2.886	152.947
GLU_356@OE1	LYS_513@HZ2	LYS_513@NZ	177111	0.0373	2.8037	155.007
GLN_271@OE1	ARG_268@HE	ARG_268@NE	176865	0.0372	2.8501	154.364
SER_144@O	ML1_259@H6	ML1_259@O2	176531	0.0372	2.778	158.739
ALA_7@O	THR_5@HG1	THR_5@OG1	176228	0.0371	2.747	161.444
SER_343@O	ALA_346@H	ALA_346@N	175861	0.037	2.9093	153.018
ASP_83@OD1	ASN_335@HD22	ASN_335@ND2	175673	0.037	2.8298	163.485
GLU_58@OE1	ARG_66@HH21	ARG_66@NH2	175240	0.0369	2.7939	154.272
VAL_348@O	ALA_352@H	ALA_352@N	175194	0.0369	2.8834	157.997
GLU_394@OE1	SER_403@HG	SER_403@OG	175164	0.0369	2.6822	163.783
ASN_177@OD1	LYS_319@HZ1	LYS_319@NZ	174857	0.0368	2.8153	152.418
ASN_287@O	ASN_335@HD22	ASN_335@ND2	174350	0.0367	2.851	156.175
GLU_166@OE1	ARG_169@HH11	ARG_169@NH1	173991	0.0366	2.7988	156.96
ASN_177@OD1	LYS_319@HZ3	LYS_319@NZ	173631	0.0366	2.8148	152.651
SER_445@OG	GLN_12@HE22	GLN_12@NE2	173012	0.0364	2.8681	159.537
SER_405@O	GLN_409@HE22	GLN_409@NE2	172951	0.0364	2.8576	159.071
LEU_395@O	SER_398@HG	SER_398@OG	172932	0.0364	2.7458	157.076
ALA_128@O	LEU_131@H	LEU_131@N	172687	0.0364	2.9155	153.515
GLN_359@OE1	LYS_487@HZ3	LYS_487@NZ	172192	0.0363	2.8085	150.139
ASP_334@O	SER_336@H	SER_336@N	171984	0.0362	2.8746	145.856
LEU_447@O	ARG_453@HH21	ARG_453@NH2	171687	0.0361	2.829	149.471
GLN_359@OE1	LYS_487@HZ2	LYS_487@NZ	171532	0.0361	2.8084	150.128
TYR_500@O	GLY_503@H	GLY_503@N	171447	0.0361	2.8854	146.421
GLN_150@OE1	SER_262@H	SER_262@N	170826	0.036	2.8557	161.122
GLN_359@OE1	LYS_487@HZ1	LYS_487@NZ	170618	0.0359	2.8091	150.102
GLN_170@OE1	GLN_173@HE22	GLN_173@NE2	170128	0.0358	2.8408	156.701
MET_439@O	GLN_442@H	GLN_442@N	169295	0.0356	2.8875	149.806
GLN_8@OE1	GLN_8@H	GLN_8@N	168578	0.0355	2.8388	148.978
VAL_227@O	ARG_230@H	ARG_230@N	168252	0.0354	2.8937	144.359
SER_403@OG	SER_405@HG	SER_405@OG	168104	0.0354	2.7965	159.602
GLN_359@O	GLN_359@HE22	GLN_359@NE2	167799	0.0353	2.8617	150.056
ASP_243@OD2	THR_264@H	THR_264@N	167704	0.0353	2.8762	161.556
TRP_433@O	ASN_437@H	ASN_437@N	167691	0.0353	2.883	152.146
ASP_86@O	VAL_89@H	VAL_89@N	167582	0.0353	2.8914	150.805
GLU_394@OE2	SER_398@HG	SER_398@OG	167460	0.0353	2.6596	164.293
GLN_442@O	SER_445@H	SER_445@N	167222	0.0352	2.9085	151.765
GLY_353@O	ASN_347@HD22	ASN_347@ND2	166944	0.0351	2.8752	158.589
SER_338@OG	THR_82@HG1	THR_82@OG1	166704	0.0351	2.8025	157.181
ASN_437@OD1	ARG_19@HH12	ARG_19@NH1	166419	0.035	2.8364	149.836
GLU_394@OE2	SER_403@HG	SER_403@OG	166374	0.035	2.6805	163.89
GLU_492@O	VAL_496@H	VAL_496@N	166344	0.035	2.8894	152.796
THR_159@O	ASN_161@H	ASN_161@N	165857	0.0349	2.896	144.754
SER_138@O	ARG_134@HH11	ARG_134@NH1	165813	0.0349	2.8275	155.532
GLU_52@OE1	ARG_9@HH12	ARG_9@NH1	165532	0.0348	2.8157	157.188
GLU_317@OE2	ARG_325@HE	ARG_325@NE	165491	0.0348	2.8355	155.037
GLU_391@OE1	ML1_518@H6	ML1_518@O2	165347	0.0348	2.7144	164.835
ASP_243@OD2	ARG_268@HH21	ARG_268@NH2	164902	0.0347	2.7995	155.394
GLU_455@OE2	ARG_489@HH21	ARG_489@NH2	164826	0.0347	2.8072	156.529
GLU_133@OE1	ARG_126@HH22	ARG_126@NH2	164816	0.0347	2.8012	157.608
ASN_177@OD1	LYS_319@HZ2	LYS_319@NZ	164698	0.0347	2.815	152.688
GLU_356@OE2	ASN_350@HD22	ASN_350@ND2	164683	0.0347	2.8046	158.787
GLU_176@OE1	ARG_175@HH12	ARG_175@NH1	164345	0.0346	2.8202	149.463
ASP_92@O	SER_249@HG	SER_249@OG	164239	0.0346	2.7553	161.653
PHE_493@O	ASP_497@H	ASP_497@N	163845	0.0345	2.8965	160.509
HIE_160@ND1	GLN_116@HE21	GLN_116@NE2	163816	0.0345	2.9152	159.931
GLY_78@O	GLN_80@HE22	GLN_80@NE2	163788	0.0345	2.8551	159.213
GLU_323@OE1	ARG_325@H	ARG_325@N	163314	0.0344	2.821	157.733
GLU_455@OE1	ARG_489@HH21	ARG_489@NH2	163306	0.0344	2.806	156.505
THR_82@O	ASN_335@HD21	ASN_335@ND2	163191	0.0344	2.8416	160.762
SER_144@OG	ARG_194@HH11	ARG_194@NH1	163059	0.0343	2.8786	154.933
GLU_97@OE1	ASN_420@HD22	ASN_420@ND2	163055	0.0343	2.8171	159.258
PRO_26@O	ASN_28@H	ASN_28@N	163009	0.0343	2.8603	146.741
LYS_60@O	THR_341@HG1	THR_341@OG1	162950	0.0343	2.7486	163.219
GLU_64@O	ARG_66@H	ARG_66@N	162620	0.0342	2.8776	146.37
SER_398@O	SER_402@HG	SER_402@OG	162611	0.0342	2.7335	160.617
GLU_52@OE2	ARG_9@HH22	ARG_9@NH2	162356	0.0342	2.8069	156.836
ASP_448@OD1	ARG_453@HH11	ARG_453@NH1	162196	0.0341	2.7952	155.412
LEU_511@O	ASP_515@H	ASP_515@N	162194	0.0341	2.8693	158.594
GLU_64@OE2	ARG_67@HE	ARG_67@NE	161878	0.0341	2.8312	156.226
ASN_420@O	VAL_424@H	VAL_424@N	161678	0.034	2.9104	160.096
GLU_272@OE2	SER_265@H	SER_265@N	161640	0.034	2.8535	159.324
GLN_12@OE1	GLN_442@HE21	GLN_442@NE2	161498	0.034	2.8629	162.225
GLU_176@OE1	GLN_173@HE21	GLN_173@NE2	161392	0.034	2.8206	159.008
PRO_400@O	TYR_11@H	TYR_11@N	161221	0.0339	2.8782	161.692
ASP_256@OD2	ALA_257@H	ALA_257@N	161204	0.0339	2.8489	145.019
HIE_185@O	ARG_194@HH21	ARG_194@NH2	161149	0.0339	2.8621	145.172
ASP_86@OD1	ARG_278@HH21	ARG_278@NH2	160883	0.0339	2.793	154.529
ASN_340@O	GLN_173@HE21	GLN_173@NE2	160847	0.0339	2.8503	152.793
ASP_515@OD1	ALA_516@H	ALA_516@N	160845	0.0339	2.8427	145.178
ALA_516@OXT	ARG_214@HE	ARG_214@NE	160790	0.0339	2.8331	157.765
ASN_436@OD1	GLN_80@HE21	GLN_80@NE2	160278	0.0337	2.8555	160.213
VAL_255@O	ALA_257@H	ALA_257@N	160161	0.0337	2.8753	146.731
GLU_404@OE2	HIE_444@HE2	HIE_444@NE2	160125	0.0337	2.8403	155.332
LYS_2@O	THR_5@H	THR_5@N	160113	0.0337	2.8977	155.618
SER_262@O	SER_265@HG	SER_265@OG	160091	0.0337	2.72	161.267
GLU_133@OE2	ARG_126@HH22	ARG_126@NH2	159575	0.0336	2.8013	157.328
ASN_437@O	ILE_441@H	ILE_441@N	159558	0.0336	2.9181	161.395
GLU_225@O	GLN_229@HE22	GLN_229@NE2	159403	0.0336	2.8638	158.877
ARG_66@O	ARG_32@HH12	ARG_32@NH1	159333	0.0335	2.8502	150.172
ASP_256@OD1	ALA_257@H	ALA_257@N	159267	0.0335	2.849	145.007
ASN_340@O	TRP_433@HE1	TRP_433@NE1	159179	0.0335	2.8489	149.002
ASP_515@OD2	ALA_516@H	ALA_516@N	159019	0.0335	2.8431	145.235
GLU_176@OE2	GLN_173@HE21	GLN_173@NE2	158862	0.0334	2.8217	159.142
HIE_446@ND1	TYR_500@HH	TYR_500@OH	158824	0.0334	2.848	159.734
ASN_335@O	GLY_289@H	GLY_289@N	158690	0.0334	2.8621	158.552
PRO_400@O	GLN_12@HE21	GLN_12@NE2	158476	0.0334	2.8468	150.68
LEU_447@O	ARG_453@HH11	ARG_453@NH1	158108	0.0333	2.8337	159.492
ASN_367@OD1	ASN_108@HD21	ASN_108@ND2	158065	0.0333	2.8701	150.771
GLU_196@OE2	ARG_230@HH21	ARG_230@NH2	158035	0.0333	2.8084	156.457
ASP_189@OD1	ASP_190@H	ASP_190@N	157979	0.0333	2.8312	142.448
SER_336@O	SER_77@HG	SER_77@OG	157939	0.0333	2.7527	160.569
PHE_112@O	GLN_116@HE22	GLN_116@NE2	157657	0.0332	2.8339	157.925
GLU_416@OE2	ARG_428@HH21	ARG_428@NH2	157611	0.0332	2.809	156.154
GLU_52@OE1	ARG_9@HH22	ARG_9@NH2	157438	0.0331	2.8064	156.827
ASP_345@OD2	SER_79@HG	SER_79@OG	157234	0.0331	2.6778	163.696
LEU_167@O	GLN_170@H	GLN_170@N	157182	0.0331	2.9165	149.428
SER_338@O	ASP_342@H	ASP_342@N	157167	0.0331	2.8859	154.359
MET_422@O	GLU_425@H	GLU_425@N	156037	0.0328	2.8886	143.191
GLY_70@O	ARG_32@HH21	ARG_32@NH2	155778	0.0328	2.8227	152.062
GLU_391@OE2	ARG_453@HH11	ARG_453@NH1	155710	0.0328	2.8075	156.395
ASP_86@OD2	LYS_319@HZ3	LYS_319@NZ	155292	0.0327	2.7783	159.101
GLU_145@OE1	ARG_268@HH12	ARG_268@NH1	155209	0.0327	2.7913	159.665
GLU_392@OE1	ARG_393@HH21	ARG_393@NH2	154420	0.0325	2.8227	154.679
SER_143@O	SER_146@HG	SER_146@OG	153958	0.0324	2.7408	159.805
GLU_317@OE1	ARG_325@HE	ARG_325@NE	153788	0.0324	2.8371	155.059
LEU_104@O	ASN_108@H	ASN_108@N	153552	0.0323	2.92	157.221
ASP_448@OD2	TYR_452@H	TYR_452@N	153059	0.0322	2.8389	152.296
ARG_126@O	LEU_129@H	LEU_129@N	152909	0.0322	2.8991	145.418
LEU_192@O	LYS_195@H	LYS_195@N	152888	0.0322	2.9038	156.893
GLU_196@OE1	ARG_230@HH21	ARG_230@NH2	152864	0.0322	2.8085	156.406
ASP_448@OD2	ARG_453@HH11	ARG_453@NH1	152839	0.0322	2.7878	155.74
GLU_52@OE2	ARG_9@HH12	ARG_9@NH1	152501	0.0321	2.8179	156.843
GLU_58@OE2	ARG_66@HE	ARG_66@NE	152364	0.0321	2.8251	154.633
GLY_30@O	ARG_32@HH11	ARG_32@NH1	152252	0.0321	2.829	153.764
GLY_329@O	ARG_291@HE	ARG_291@NE	152021	0.032	2.8528	149.322
ASP_507@O	ASN_495@HD21	ASN_495@ND2	151886	0.032	2.8576	157.353
ASP_86@OD1	ARG_428@HH22	ARG_428@NH2	151712	0.0319	2.8015	159.028
GLU_425@OE2	ASN_88@HD21	ASN_88@ND2	151635	0.0319	2.8406	156.663
LEU_316@O	GLY_320@H	GLY_320@N	151137	0.0318	2.8637	144.623
GLU_58@OE1	ARG_66@HE	ARG_66@NE	150623	0.0317	2.8247	153.886
GLN_267@OE1	THR_305@HG1	THR_305@OG1	150549	0.0317	2.7578	161.899
GLN_359@OE1	HIE_160@HE2	HIE_160@NE2	150381	0.0317	2.8436	153.562
GLU_416@OE1	ARG_428@HH21	ARG_428@NH2	150286	0.0316	2.8104	156.004
ASP_86@OD2	ARG_428@HH22	ARG_428@NH2	150279	0.0316	2.8018	159.232
ASP_334@OD2	THR_82@HG1	THR_82@OG1	150097	0.0316	2.7212	161.821
GLU_392@OE2	ARG_393@HH21	ARG_393@NH2	149985	0.0316	2.8241	154.093
PRO_285@O	ASN_287@HD22	ASN_287@ND2	149950	0.0316	2.8562	157.832
GLN_386@O	GLN_389@H	GLN_389@N	149903	0.0316	2.8973	149.084
GLU_133@OE2	ARG_126@HH12	ARG_126@NH1	149705	0.0315	2.7948	159.008
GLU_13@O	ALA_16@H	ALA_16@N	149608	0.0315	2.893	142.96
ALA_69@O	ARG_32@HH21	ARG_32@NH2	149443	0.0315	2.8307	151.454
ASP_86@OD2	LYS_319@HZ2	LYS_319@NZ	149257	0.0314	2.778	159.054
GLU_31@OE1	ASN_28@H	ASN_28@N	148954	0.0314	2.8513	162.272
ASN_28@OD1	GLY_30@H	GLY_30@N	148831	0.0313	2.8761	154.029
ASP_512@O	VAL_514@H	VAL_514@N	148798	0.0313	2.8702	147.363
GLU_58@OE2	ARG_66@HH21	ARG_66@NH2	148508	0.0313	2.7952	153.532
GLU_13@OE2	GLN_8@HE22	GLN_8@NE2	148443	0.0313	2.8161	161.597
GLU_391@OE1	ARG_453@HH11	ARG_453@NH1	148033	0.0312	2.806	156.122
ASP_449@OD2	SER_450@H	SER_450@N	147431	0.031	2.8248	143.298
GLU_111@OE2	ARG_214@HH11	ARG_214@NH1	147283	0.031	2.7914	158.18
ASP_448@OD1	ARG_453@H	ARG_453@N	147257	0.031	2.861	161.501
GLU_394@OE1	SER_398@HG	SER_398@OG	147022	0.031	2.6675	163.558
GLU_166@OE2	GLN_170@HE22	GLN_170@NE2	146715	0.0309	2.8201	161.236
GLU_13@OE1	ARG_9@HH11	ARG_9@NH1	146555	0.0309	2.7903	157.836
GLU_484@O	GLN_488@HE22	GLN_488@NE2	146453	0.0308	2.8657	159.118
GLU_106@OE1	SER_171@HG	SER_171@OG	146289	0.0308	2.7223	161.952
GLU_13@OE2	ARG_9@HH11	ARG_9@NH1	146099	0.0308	2.7904	157.794
ASP_248@OD2	SER_262@H	SER_262@N	146076	0.0308	2.8384	156.246
GLU_13@OE1	GLN_8@HE22	GLN_8@NE2	145743	0.0307	2.8175	161.618
ASP_86@OD2	LYS_319@HZ1	LYS_319@NZ	145332	0.0306	2.7782	158.959
ASP_75@OD2	SER_336@HG	SER_336@OG	145282	0.0306	2.6767	160.87
ASN_436@OD1	ARG_19@HH22	ARG_19@NH2	145009	0.0305	2.8286	154.389
GLU_133@OE1	ARG_126@HH12	ARG_126@NH1	144801	0.0305	2.7958	158.894
GLY_61@O	ASN_76@HD21	ASN_76@ND2	144778	0.0305	2.8431	159.752
GLU_176@OE2	ARG_175@HH21	ARG_175@NH2	144525	0.0304	2.7882	154.329
GLU_31@OE2	ASN_28@H	ASN_28@N	144432	0.0304	2.8542	162.702
GLU_370@OE2	ARG_473@HH11	ARG_473@NH1	144386	0.0304	2.7936	158.489
GLU_106@OE2	SER_171@HG	SER_171@OG	143737	0.0303	2.724	162.003
ASN_108@OD1	ASN_367@HD21	ASN_367@ND2	143592	0.0302	2.8724	151.167
GLU_176@OE2	ARG_175@HH22	ARG_175@NH2	143233	0.0302	2.7866	153.438
THR_418@O	ASN_420@H	ASN_420@N	143186	0.0301	2.8905	144.835
ASP_345@OD1	GLN_12@HE22	GLN_12@NE2	143132	0.0301	2.823	160.066
GLU_272@OE2	SER_265@HG	SER_265@OG	143017	0.0301	2.7117	164.109
ASP_512@OD1	LYS_513@H	LYS_513@N	143008	0.0301	2.8332	146.325
ALA_399@O	GLY_401@H	GLY_401@N	142981	0.0301	2.8352	146.538
ASP_256@OD1	LYS_228@HZ3	LYS_228@NZ	142336	0.03	2.8073	153.355
ASP_256@OD1	LYS_228@HZ1	LYS_228@NZ	141976	0.0299	2.8055	153.41
GLN_339@OE1	ASN_340@HD22	ASN_340@ND2	141963	0.0299	2.8414	161.016
VAL_332@O	SER_336@HG	SER_336@OG	141377	0.0298	2.7599	161.539
GLU_111@OE1	ARG_214@HH11	ARG_214@NH1	140975	0.0297	2.7904	158.452
ASP_334@OD1	TYR_286@HH	TYR_286@OH	140762	0.0296	2.6942	163.765
LYS_470@O	ALA_472@H	ALA_472@N	140674	0.0296	2.8959	142.667
GLU_145@OE2	ARG_268@HH22	ARG_268@NH2	140649	0.0296	2.7988	160.191
ASP_334@OD2	TYR_286@HH	TYR_286@OH	140250	0.0295	2.6919	163.734
SER_79@O	SER_338@HG	SER_338@OG	139583	0.0294	2.7315	160.99
ALA_516@OXT	ARG_214@HH22	ARG_214@NH2	139521	0.0294	2.8089	156.21
ASP_243@OD1	ARG_268@HH12	ARG_268@NH1	139514	0.0294	2.7851	160.891
GLU_404@OE1	HIE_444@HE2	HIE_444@NE2	139385	0.0293	2.8341	154.479
GLN_103@OE1	GLN_100@HE21	GLN_100@NE2	139359	0.0293	2.8514	149.257
GLY_61@O	SER_77@HG	SER_77@OG	139189	0.0293	2.7508	159.562
ASP_449@OD1	SER_450@H	SER_450@N	139147	0.0293	2.8253	143.225
GLU_196@OE2	ASN_226@HD21	ASN_226@ND2	138984	0.0293	2.8368	159.511
GLN_267@OE1	ARG_268@HH11	ARG_268@NH1	138517	0.0292	2.8184	159.097
SER_144@O	ARG_194@HH22	ARG_194@NH2	138515	0.0292	2.8271	153.554
ALA_516@OXT	ARG_214@HH12	ARG_214@NH1	138348	0.0291	2.8035	156.615
ASP_256@OD2	LYS_228@HZ3	LYS_228@NZ	138330	0.0291	2.8074	153.054
ASP_448@OD2	LEU_451@H	LEU_451@N	138294	0.0291	2.8347	152.11
GLU_97@OE2	ASN_420@HD22	ASN_420@ND2	137999	0.0291	2.8164	159.376
GLU_135@OE2	ALA_140@H	ALA_140@N	137830	0.029	2.8684	157.966
ASP_342@OD1	ASN_81@HD22	ASN_81@ND2	137499	0.0289	2.8152	155.637
GLU_38@O	GLU_41@H	GLU_41@N	137463	0.0289	2.8966	144.384
GLU_166@OE2	ARG_169@HH11	ARG_169@NH1	137439	0.0289	2.7991	157.617
GLU_295@OE1	ARG_296@H	ARG_296@N	137365	0.0289	2.8467	146.1
SER_144@O	ARG_194@HH12	ARG_194@NH1	137201	0.0289	2.84	153.544
ASP_243@OD2	ALA_263@H	ALA_263@N	136898	0.0288	2.8275	159.15
ALA_93@O	ASN_88@HD22	ASN_88@ND2	136881	0.0288	2.8486	161.273
ASP_189@OD1	LEU_192@H	LEU_192@N	136447	0.0287	2.8554	152.113
LYS_254@O	GLN_100@HE22	GLN_100@NE2	136280	0.0287	2.8392	157.206
ALA_516@O	ARG_214@HH12	ARG_214@NH1	136207	0.0287	2.8025	156.836
ARG_169@O	GLN_173@HE22	GLN_173@NE2	136193	0.0287	2.8585	159.405
ASN_436@OD1	ARG_9@H	ARG_9@N	136189	0.0287	2.8736	160.606
ALA_101@O	LEU_104@H	LEU_104@N	135998	0.0286	2.9174	146.504
LYS_211@O	ALA_213@H	ALA_213@N	135986	0.0286	2.8962	142.684
VAL_514@O	ALA_516@H	ALA_516@N	135902	0.0286	2.8746	146.612
GLU_196@OE1	ASN_226@HD21	ASN_226@ND2	135624	0.0286	2.8368	159.37
ASP_190@O	SER_191@HG	SER_191@OG	135575	0.0285	2.7013	157.458
ASN_437@OD1	ILE_441@H	ILE_441@N	135538	0.0285	2.9021	159.443
ASP_345@O	VAL_348@H	VAL_348@N	135511	0.0285	2.8988	148.747
ASP_334@O	THR_82@HG1	THR_82@OG1	135469	0.0285	2.7405	159.115
SER_146@O	MET_149@H	MET_149@N	135104	0.0284	2.9082	157.514
GLU_370@OE1	ARG_473@HH11	ARG_473@NH1	134806	0.0284	2.7937	158.519
GLU_323@OE2	ARG_291@HH22	ARG_291@NH2	134564	0.0283	2.8032	157.178
ASP_515@OD2	ARG_473@HH12	ARG_473@NH1	134506	0.0283	2.7907	158.813
GLU_13@OE2	SER_6@HG	SER_6@OG	134398	0.0283	2.6716	164.202
GLN_267@OE1	THR_305@H	THR_305@N	134386	0.0283	2.8701	160.153
GLU_36@OE1	ARG_37@H	ARG_37@N	134321	0.0283	2.8475	146.083
THR_264@OG1	GLU_145@H	GLU_145@N	134171	0.0282	2.9053	152.222
ASP_243@OD2	THR_264@HG1	THR_264@OG1	133812	0.0282	2.6516	163.438
SER_186@OG	GLN_271@HE21	GLN_271@NE2	133310	0.0281	2.8995	155.932
ASP_256@OD2	LYS_228@HZ1	LYS_228@NZ	133273	0.0281	2.8072	152.974
GLU_392@OE2	ARG_393@HE	ARG_393@NE	133077	0.028	2.8145	156.623
GLN_116@OE1	THR_159@HG1	THR_159@OG1	132818	0.028	2.7125	158.974
ASP_189@OD1	ARG_268@HH22	ARG_268@NH2	132653	0.0279	2.7966	157.42
LYS_60@O	SER_79@HG	SER_79@OG	132649	0.0279	2.7637	155.592
ML1_518@O4	ARG_453@HH11	ARG_453@NH1	132438	0.0279	2.8783	154.447
GLU_135@OE1	ALA_140@H	ALA_140@N	132112	0.0278	2.8672	158.231
ASP_334@O	GLY_337@H	GLY_337@N	132097	0.0278	2.8895	155.992
LEU_395@O	ARG_453@HH12	ARG_453@NH1	132072	0.0278	2.8302	156.323
GLU_36@OE2	ARG_37@H	ARG_37@N	131878	0.0278	2.8475	146.079
LEU_188@O	ARG_194@HH21	ARG_194@NH2	131414	0.0277	2.843	147.848
ASN_436@OD1	ARG_9@HH21	ARG_9@NH2	131403	0.0277	2.806	155.825
SER_338@O	THR_82@H	THR_82@N	131257	0.0276	2.8757	155.707
THR_5@O	SER_398@HG	SER_398@OG	131243	0.0276	2.7069	162.139
ASP_75@OD2	ASN_76@H	ASN_76@N	131181	0.0276	2.8412	145.22
ASN_437@O	TRP_440@H	TRP_440@N	130968	0.0276	2.9086	148.973
GLN_432@OE1	ASN_436@HD22	ASN_436@ND2	130728	0.0275	2.8267	158.355
ASP_83@OD1	ARG_278@HH12	ARG_278@NH1	130643	0.0275	2.8063	157.218
VAL_514@O	GLN_359@HE21	GLN_359@NE2	130489	0.0275	2.8626	155.463
GLU_64@OE2	ARG_66@HH11	ARG_66@NH1	130358	0.0274	2.783	156.772
SER_6@O	ARG_9@HH12	ARG_9@NH1	130140	0.0274	2.8226	156.63
GLN_12@OE1	GLN_8@H	GLN_8@N	129958	0.0274	2.837	151.644
ASP_345@OD1	GLN_80@HE22	GLN_80@NE2	129872	0.0273	2.8165	153.791
ASP_86@OD2	ARG_428@HH12	ARG_428@NH1	129589	0.0273	2.8138	158.744
ALA_516@OXT	ARG_214@HH21	ARG_214@NH2	129245	0.0272	2.8103	155.044
GLU_295@OE2	ARG_296@H	ARG_296@N	129237	0.0272	2.8475	146.065
GLN_183@O	SER_186@H	SER_186@N	129151	0.0272	2.9051	146.348
ASP_86@OD2	ARG_278@HH21	ARG_278@NH2	128542	0.0271	2.7963	154.907
PRO_251@O	GLN_100@HE21	GLN_100@NE2	128384	0.027	2.8436	158.6
ASP_256@OD1	LYS_228@HZ2	LYS_228@NZ	128352	0.027	2.8074	153.545
GLU_297@O	GLU_300@H	GLU_300@N	127740	0.0269	2.8964	144.286
GLU_176@OE1	ARG_175@HE	ARG_175@NE	127646	0.0269	2.8369	150.715
ASP_83@OD2	ARG_278@HH21	ARG_278@NH2	127469	0.0268	2.8017	158.031
ILE_55@O	GLU_58@H	GLU_58@N	127367	0.0268	2.9045	143.462
SER_6@OG	SER_398@HG	SER_398@OG	127006	0.0267	2.7612	163.223
ASP_256@OD2	LYS_228@HZ2	LYS_228@NZ	126976	0.0267	2.8057	153.224
LEU_57@O	GLY_61@H	GLY_61@N	126967	0.0267	2.8652	145.16
ALA_516@O	ARG_214@HH22	ARG_214@NH2	126856	0.0267	2.8078	155.98
GLU_135@OE1	SER_144@HG	SER_144@OG	126567	0.0266	2.6721	163.952
GLU_13@OE1	SER_6@HG	SER_6@OG	126381	0.0266	2.6741	164.073
TRP_250@O	LYS_254@H	LYS_254@N	126204	0.0266	2.891	156.4
GLU_38@OE1	ARG_37@HH11	ARG_37@NH1	126113	0.0266	2.796	157.908
ASP_334@OD1	ARG_66@HH22	ARG_66@NH2	125981	0.0265	2.8001	155.741
SER_6@O	GLN_8@H	GLN_8@N	125797	0.0265	2.8398	146.088
TYR_241@OH	HIE_187@HE2	HIE_187@NE2	125722	0.0265	2.8922	154.119
GLN_359@OE1	TRP_509@HE1	TRP_509@NE1	125012	0.0263	2.8528	154.882
GLN_8@OE1	THR_5@HG1	THR_5@OG1	124031	0.0261	2.7492	160.143
ASN_347@O	GLY_353@H	GLY_353@N	123710	0.026	2.8865	153.172
GLU_455@OE1	ASN_485@HD21	ASN_485@ND2	123632	0.026	2.8317	160.521
GLU_297@OE2	ARG_296@HH11	ARG_296@NH1	123215	0.0259	2.7955	157.686
THR_307@OG1	THR_305@HG1	THR_305@OG1	123140	0.0259	2.8204	157.733
HIE_187@O	TYR_241@HH	TYR_241@OH	122992	0.0259	2.7723	157.917
ASP_334@OD2	ARG_66@HH22	ARG_66@NH2	122930	0.0259	2.8004	155.945
ALA_360@O	LEU_363@H	LEU_363@N	122887	0.0259	2.915	146.4
HIE_444@O	ARG_453@HH22	ARG_453@NH2	122863	0.0259	2.8174	158.259
GLU_38@OE2	ARG_37@HH11	ARG_37@NH1	122823	0.0259	2.7951	157.972
ASP_83@OD1	ARG_278@HH21	ARG_278@NH2	122099	0.0257	2.8059	157.785
ASN_28@OD1	GLN_339@HE22	GLN_339@NE2	122056	0.0257	2.8445	158.938
GLN_170@OE1	ASN_81@HD21	ASN_81@ND2	121764	0.0256	2.8457	154.77
TRP_509@O	LYS_513@H	LYS_513@N	121717	0.0256	2.8859	159.782
PRO_251@O	GLN_100@HE22	GLN_100@NE2	121664	0.0256	2.8661	162.797
LEU_105@O	ASN_108@H	ASN_108@N	121463	0.0256	2.9083	143.092
ASN_420@OD1	GLN_375@HE21	GLN_375@NE2	121391	0.0256	2.8634	161.41
PRO_344@O	ASN_347@HD22	ASN_347@ND2	121377	0.0256	2.8192	159.597
GLN_173@O	ASN_177@HD22	ASN_177@ND2	121284	0.0255	2.8324	158.672
SER_144@O	GLY_147@H	GLY_147@N	121284	0.0255	2.885	148.897
GLN_222@O	GLN_222@HE22	GLN_222@NE2	121275	0.0255	2.8709	149.82
GLN_481@O	GLN_481@HE22	GLN_481@NE2	120772	0.0254	2.8701	149.987
ASP_75@O	SER_79@H	SER_79@N	120585	0.0254	2.8622	160.017
ASP_345@OD2	SER_343@HG	SER_343@OG	120480	0.0254	2.635	164.303
ASN_340@O	SER_338@HG	SER_338@OG	119750	0.0252	2.736	155.849
GLU_133@OE2	ARG_134@HE	ARG_134@NE	119693	0.0252	2.8082	157.321
ALA_7@O	ARG_9@H	ARG_9@N	119552	0.0252	2.8696	146.68
PHE_501@O	TYR_504@H	TYR_504@N	119526	0.0252	2.9023	151.102
SER_338@O	TYR_27@H	TYR_27@N	119496	0.0252	2.8921	157.57
HIE_160@O	ASN_350@HD21	ASN_350@ND2	119472	0.0252	2.8483	156.716
GLN_150@O	GLN_150@HE22	GLN_150@NE2	119221	0.0251	2.8498	151.423
GLU_455@OE2	ASN_485@HD21	ASN_485@ND2	118959	0.025	2.8323	160.668
GLU_290@O	SER_336@HG	SER_336@OG	118803	0.025	2.6979	163.035
GLU_297@OE1	ARG_296@HH11	ARG_296@NH1	118772	0.025	2.7965	157.772
ASP_86@OD1	ARG_428@HH12	ARG_428@NH1	118224	0.0249	2.8163	158.873
GLU_272@OE2	THR_264@H	THR_264@N	118216	0.0249	2.8666	150.819
GLU_492@OE1	GLN_488@HE22	GLN_488@NE2	118101	0.0249	2.8338	162.469
ASN_88@OD1	ASN_177@HD22	ASN_177@ND2	118063	0.0249	2.8298	163.067
GLU_233@O	ASN_236@HD22	ASN_236@ND2	117961	0.0248	2.8441	159.32
ASP_256@O	HIE_419@HE2	HIE_419@NE2	117909	0.0248	2.8514	157.176
ASP_243@OD1	SER_265@HG	SER_265@OG	117785	0.0248	2.6612	163.754
GLU_111@OE1	ARG_214@HH21	ARG_214@NH2	117627	0.0248	2.7992	153.428
SER_79@O	THR_82@HG1	THR_82@OG1	117599	0.0248	2.7614	160.834
LEU_374@O	LYS_470@HZ3	LYS_470@NZ	117436	0.0247	2.8415	152.608
ASP_345@OD1	ASN_437@HD21	ASN_437@ND2	117353	0.0247	2.8458	161.416
GLN_429@OE1	ARG_428@HH22	ARG_428@NH2	117159	0.0247	2.8122	154.702
GLU_392@OE1	ARG_393@HE	ARG_393@NE	117120	0.0247	2.8136	156.55
GLN_267@OE1	GLN_267@H	GLN_267@N	117043	0.0246	2.8481	148.304
ASP_345@OD1	ARG_19@HH22	ARG_19@NH2	116637	0.0246	2.7951	156.207
LEU_374@O	LYS_470@HZ1	LYS_470@NZ	116631	0.0246	2.842	152.525
ASP_334@OD2	ARG_67@HH22	ARG_67@NH2	116568	0.0245	2.8019	157.733
ALA_399@O	MET_1@H3	MET_1@N	116503	0.0245	2.8299	155.529
SER_144@OG	ARG_194@HH12	ARG_194@NH1	116431	0.0245	2.8888	152.549
ASN_485@O	TRP_456@HE1	TRP_456@NE1	116397	0.0245	2.8911	157.181
GLN_339@O	SER_343@HG	SER_343@OG	116298	0.0245	2.7624	160.254
PHE_371@O	GLN_375@HE22	GLN_375@NE2	116286	0.0245	2.8345	158.397
SER_336@O	ASN_177@HD21	ASN_177@ND2	116255	0.0245	2.8652	155.695
ALA_399@O	MET_1@H2	MET_1@N	116189	0.0245	2.8296	155.501
ARG_393@O	ALA_396@H	ALA_396@N	116151	0.0245	2.9072	150.74
ASP_92@OD2	LYS_283@HZ2	LYS_283@NZ	115903	0.0244	2.8066	154.639
ASP_239@O	PHE_242@H	PHE_242@N	115420	0.0243	2.9014	148.662
ALA_263@O	SER_265@H	SER_265@N	115311	0.0243	2.8345	147.016
GLU_365@OE2	TRP_431@HE1	TRP_431@NE1	115305	0.0243	2.856	157.019
THR_48@OG1	THR_46@HG1	THR_46@OG1	115239	0.0243	2.82	157.981
ASP_189@OD2	ARG_268@HH22	ARG_268@NH2	115158	0.0242	2.7976	157.341
ALA_376@O	LYS_470@HZ1	LYS_470@NZ	115151	0.0242	2.8161	152.24
GLN_271@OE1	ARG_268@HH21	ARG_268@NH2	115134	0.0242	2.8318	151.451
ASP_515@OD1	ARG_473@HH22	ARG_473@NH2	115127	0.0242	2.8102	158.117
ALA_376@O	LYS_470@HZ2	LYS_470@NZ	115042	0.0242	2.8156	152.261
GLN_432@OE1	ARG_428@HH11	ARG_428@NH1	114997	0.0242	2.8103	156.266
GLU_135@OE2	ARG_194@HH12	ARG_194@NH1	114784	0.0242	2.8179	153.561
GLU_135@OE1	ARG_194@HH12	ARG_194@NH1	114686	0.0241	2.8182	153.226
SER_405@OG	SER_6@H	SER_6@N	114500	0.0241	2.9024	158.2
MET_125@O	ALA_128@H	ALA_128@N	114484	0.0241	2.9063	144.375
ASP_75@OD1	ASN_76@H	ASN_76@N	114445	0.0241	2.8384	145.147
ALA_352@O	PHE_355@H	PHE_355@N	114380	0.0241	2.889	145.862
ASP_459@OD2	ARG_489@HH12	ARG_489@NH1	114114	0.024	2.759	157.81
ASN_437@O	MET_439@H	MET_439@N	114105	0.024	2.842	148.157
ASP_515@OD2	ARG_473@HH22	ARG_473@NH2	114104	0.024	2.8068	157.53
ALA_376@O	LYS_470@HZ3	LYS_470@NZ	113925	0.024	2.8156	152.365
LEU_374@O	LYS_470@HZ2	LYS_470@NZ	113790	0.024	2.8424	152.51
GLU_145@OE1	ARG_175@HH12	ARG_175@NH1	113697	0.0239	2.7951	157.491
SER_336@OG	SER_338@HG	SER_338@OG	113654	0.0239	2.7779	161.718
PRO_344@O	ALA_352@H	ALA_352@N	113591	0.0239	2.888	160.488
ASP_92@OD2	SER_249@HG	SER_249@OG	113345	0.0239	2.682	163.315
ASP_497@OD1	SER_3@H	SER_3@N	113184	0.0238	2.8327	159.668
ASP_448@OD2	SER_450@H	SER_450@N	113149	0.0238	2.8855	159.096
ASP_334@OD1	ARG_67@HH22	ARG_67@NH2	112861	0.0238	2.8029	157.726
GLY_327@O	GLY_329@H	GLY_329@N	112850	0.0238	2.8532	146.289
THR_5@OG1	GLN_12@HE21	GLN_12@NE2	112617	0.0237	2.8864	159.967
LYS_60@O	GLN_80@HE21	GLN_80@NE2	112435	0.0237	2.8638	154.772
SER_402@O	SER_405@H	SER_405@N	112340	0.0237	2.8941	150.834
HIE_444@O	GLN_12@HE22	GLN_12@NE2	111886	0.0236	2.8524	160.312
GLU_425@OE1	GLN_429@HE22	GLN_429@NE2	111799	0.0235	2.8226	161.848
ASP_342@OD2	ASN_76@HD21	ASN_76@ND2	111593	0.0235	2.8425	157.306
ALA_399@O	MET_1@H1	MET_1@N	111210	0.0234	2.8312	155.5
MET_163@O	GLU_166@H	GLU_166@N	111155	0.0234	2.8952	144.374
ASP_351@OD1	ASN_350@HD22	ASN_350@ND2	111071	0.0234	2.8233	160.565
ASP_342@OD1	ASN_347@HD21	ASN_347@ND2	111068	0.0234	2.84	158.457
VAL_332@O	SER_336@H	SER_336@N	111037	0.0234	2.8584	151.268
ASP_92@OD2	LYS_283@HZ1	LYS_283@NZ	111017	0.0234	2.8065	154.586
ASN_76@OD1	SER_77@H	SER_77@N	111004	0.0234	2.8087	147.894
LEU_115@O	LYS_211@HZ2	LYS_211@NZ	110845	0.0233	2.8433	152.296
ASP_515@OD1	ARG_473@HH12	ARG_473@NH1	110793	0.0233	2.7922	158.636
ASN_436@OD1	ARG_19@HH12	ARG_19@NH1	110647	0.0233	2.8376	153.367
GLN_130@O	GLU_133@H	GLU_133@N	110519	0.0233	2.8888	148.787
GLU_323@OE2	ARG_326@H	ARG_326@N	110334	0.0232	2.839	161.889
GLU_145@OE1	ARG_194@HH22	ARG_194@NH2	110003	0.0232	2.8047	156.516
ASN_178@OD1	LYS_283@HZ2	LYS_283@NZ	109859	0.0231	2.8161	155.574
GLU_58@OE2	ARG_66@H	ARG_66@N	109840	0.0231	2.8803	164.326
LEU_115@O	LYS_211@HZ3	LYS_211@NZ	109758	0.0231	2.843	152.259
LEU_115@O	LYS_211@HZ1	LYS_211@NZ	109596	0.0231	2.8426	152.248
SER_6@OG	GLN_8@H	GLN_8@N	109479	0.023	2.9242	158.092
GLU_166@OE1	ARG_169@HH12	ARG_169@NH1	109422	0.023	2.7928	155.701
PRO_29@O	ASN_28@HD22	ASN_28@ND2	109400	0.023	2.8583	154.595
GLU_176@OE1	TRP_172@HE1	TRP_172@NE1	109305	0.023	2.8516	155.09
ASP_92@OD2	LYS_283@HZ3	LYS_283@NZ	109294	0.023	2.8061	154.539
ASP_86@OD1	LYS_319@HZ3	LYS_319@NZ	109229	0.023	2.7822	158.819
ASP_238@OD2	ILE_240@H	ILE_240@N	109187	0.023	2.8978	162.208
CYS_90@O	ALA_93@H	ALA_93@N	109162	0.023	2.9045	152.636
ASP_351@OD2	ASN_350@HD22	ASN_350@ND2	108845	0.0229	2.8229	160.518
ASN_226@OD1	ARG_230@HH21	ARG_230@NH2	108842	0.0229	2.8237	154.864
GLU_492@OE2	GLN_488@HE22	GLN_488@NE2	108484	0.0228	2.8339	162.441
GLN_183@OE1	GLN_267@HE21	GLN_267@NE2	108479	0.0228	2.868	153.74
GLN_409@O	GLN_409@HE22	GLN_409@NE2	108420	0.0228	2.8525	151.564
ASP_190@OD2	SER_191@H	SER_191@N	108235	0.0228	2.8209	143.271
ARG_126@O	GLN_130@HE22	GLN_130@NE2	108029	0.0227	2.8562	161.279
SER_402@O	SER_405@HG	SER_405@OG	107520	0.0226	2.7377	159.466
GLU_233@OE1	GLN_229@HE22	GLN_229@NE2	107436	0.0226	2.8341	162.683
GLN_222@O	ASN_226@HD22	ASN_226@ND2	107430	0.0226	2.8556	158.4
HIE_446@O	ASP_448@H	ASP_448@N	107190	0.0226	2.8812	145.409
GLU_145@OE2	ARG_194@HH12	ARG_194@NH1	106965	0.0225	2.8112	155.965
ASP_345@OD2	ARG_19@HH22	ARG_19@NH2	106957	0.0225	2.7964	156.103
ASP_44@O	LYS_2@H	LYS_2@N	106903	0.0225	2.8214	158.77
GLU_323@OE1	ARG_291@HH11	ARG_291@NH1	106657	0.0225	2.8253	156.565
ASP_75@OD2	TYR_72@HH	TYR_72@OH	106304	0.0224	2.7287	164.137
ASP_342@OD2	ASN_347@HD21	ASN_347@ND2	106301	0.0224	2.8397	158.383
ASN_178@OD1	LYS_283@HZ3	LYS_283@NZ	106179	0.0224	2.8148	155.547
ILE_314@O	GLU_317@H	GLU_317@N	106080	0.0223	2.9044	142.485
GLU_145@OE2	ARG_268@HH12	ARG_268@NH1	106018	0.0223	2.803	158.381
SER_402@OG	ARG_453@HH11	ARG_453@NH1	105781	0.0223	2.8339	156.869
ALA_7@O	THR_46@H	THR_46@N	105595	0.0222	2.88	157.139
ASP_334@OD1	ARG_66@HH12	ARG_66@NH1	105535	0.0222	2.8171	155.706
GLU_120@OE1	ARG_119@HH11	ARG_119@NH1	105243	0.0222	2.8006	158.378
ALA_257@O	ARG_378@HH21	ARG_378@NH2	105226	0.0222	2.8022	156.001
GLU_272@O	ALA_275@H	ALA_275@N	105224	0.0222	2.8939	142.965
ASP_190@OD1	SER_191@H	SER_191@N	105212	0.0221	2.8203	143.348
SER_3@O	THR_5@H	THR_5@N	105140	0.0221	2.8616	146.062
GLU_323@OE2	ARG_325@H	ARG_325@N	104979	0.0221	2.8295	158.006
GLU_425@OE1	ARG_428@HH11	ARG_428@NH1	104742	0.0221	2.7926	155.625
ASP_86@OD1	LYS_319@HZ2	LYS_319@NZ	104720	0.022	2.7819	158.711
GLU_145@OE2	ARG_175@HH22	ARG_175@NH2	104682	0.022	2.8009	158.423
GLU_176@OE2	ARG_175@HH12	ARG_175@NH1	104591	0.022	2.8184	149.768
HIE_160@O	LYS_513@HZ1	LYS_513@NZ	104589	0.022	2.8139	153.327
ASP_448@OD1	MET_1@H3	MET_1@N	104545	0.022	2.789	150.321
GLN_432@O	GLN_432@HE22	GLN_432@NE2	104399	0.022	2.8695	148.574
ASP_190@OD1	ARG_230@HH12	ARG_230@NH1	104372	0.022	2.8407	157.012
SER_143@OG	SER_265@HG	SER_265@OG	104358	0.022	2.8432	159.892
ASP_448@OD1	MET_1@H1	MET_1@N	104330	0.022	2.7901	150.39
ASP_342@OD1	THR_341@HG1	THR_341@OG1	104300	0.022	2.7046	161.501
ASP_189@OD1	SER_262@HG	SER_262@OG	104154	0.0219	2.6752	163.828
ASN_81@OD1	THR_82@HG1	THR_82@OG1	104128	0.0219	2.7958	158.981
GLU_435@OE1	TRP_431@HE1	TRP_431@NE1	103939	0.0219	2.8516	155.016
ASP_92@OD1	LYS_283@HZ2	LYS_283@NZ	103934	0.0219	2.8094	154.012
HIE_160@O	LYS_513@HZ3	LYS_513@NZ	103914	0.0219	2.8141	153.301
ASP_515@OD1	ARG_473@HH21	ARG_473@NH2	103887	0.0219	2.8047	155.519
ASP_448@OD1	MET_1@H2	MET_1@N	103838	0.0219	2.7903	150.385
ASP_238@OD1	ILE_240@H	ILE_240@N	103613	0.0218	2.8972	161.975
HIE_160@O	LYS_513@HZ2	LYS_513@NZ	103533	0.0218	2.8137	153.347
GLU_416@OE1	ARG_428@HH12	ARG_428@NH1	103304	0.0217	2.7985	158.756
SER_338@O	THR_341@H	THR_341@N	103208	0.0217	2.8893	147.613
ASN_178@OD1	LYS_283@HZ1	LYS_283@NZ	103207	0.0217	2.8154	155.427
GLU_272@OE1	THR_264@H	THR_264@N	103088	0.0217	2.8623	150.309
ASP_334@OD2	ARG_67@HH12	ARG_67@NH1	103064	0.0217	2.8186	156.995
ASP_459@O	GLN_462@H	GLN_462@N	103032	0.0217	2.8878	141.576
LEU_131@O	ARG_134@H	ARG_134@N	102972	0.0217	2.8967	146.478
HIE_444@O	SER_402@HG	SER_402@OG	102831	0.0216	2.7748	157.778
ASP_200@O	GLN_203@H	GLN_203@N	102582	0.0216	2.888	141.545
GLU_145@OE1	ARG_268@HH22	ARG_268@NH2	102509	0.0216	2.7998	158.411
GLY_244@O	TRP_181@HE1	TRP_181@NE1	102494	0.0216	2.8532	147.542
GLU_356@OE2	ASN_161@HD22	ASN_161@ND2	102330	0.0215	2.7602	158.359
GLU_120@OE2	ARG_119@HH11	ARG_119@NH1	102307	0.0215	2.8003	158.321
ASP_334@OD1	ARG_67@HH12	ARG_67@NH1	101919	0.0215	2.8174	157.07
GLU_176@OE2	TRP_172@HE1	TRP_172@NE1	101884	0.0214	2.8496	155.165
SER_138@OG	SER_191@HG	SER_191@OG	101797	0.0214	2.7627	163.476
GLN_8@O	SER_3@HG	SER_3@OG	101738	0.0214	2.7385	160.479
SER_398@OG	GLY_401@H	GLY_401@N	101693	0.0214	2.9058	152.036
ILE_277@O	LEU_280@H	LEU_280@N	101680	0.0214	2.8865	143.043
SER_265@OG	GLN_267@HE22	GLN_267@NE2	101654	0.0214	2.8921	161.006
ASP_459@OD1	ARG_489@HH22	ARG_489@NH2	101545	0.0214	2.8517	153.691
SER_77@O	GLN_339@HE22	GLN_339@NE2	101524	0.0214	2.8447	159.272
GLY_70@O	ARG_32@HE	ARG_32@NE	101480	0.0214	2.8502	150.982
ASP_92@OD1	LYS_283@HZ1	LYS_283@NZ	101355	0.0213	2.8097	153.897
GLU_435@OE2	TRP_431@HE1	TRP_431@NE1	101344	0.0213	2.8526	155.03
LEU_426@O	GLN_429@H	GLN_429@N	101297	0.0213	2.9134	149.41
GLU_233@OE2	GLN_229@HE22	GLN_229@NE2	101118	0.0213	2.835	162.677
GLN_170@O	GLN_173@H	GLN_173@N	101076	0.0213	2.8894	142.791
GLU_145@OE2	ARG_194@HH22	ARG_194@NH2	100606	0.0212	2.8073	154.734
ARG_325@O	ARG_291@HH12	ARG_291@NH1	100454	0.0211	2.8554	151.494
GLU_425@OE2	ASN_91@HD22	ASN_91@ND2	100437	0.0211	2.8101	163.356
ASP_448@OD2	MET_1@H1	MET_1@N	100279	0.0211	2.7912	149.702
ASP_243@OD1	LYS_261@H	LYS_261@N	100275	0.0211	2.8165	154.482
LEU_364@O	ASN_367@H	ASN_367@N	100145	0.0211	2.9096	142.764
GLU_404@OE2	LYS_60@HZ3	LYS_60@NZ	100009	0.0211	2.7933	156.974
ASP_448@OD2	SER_398@HG	SER_398@OG	99818	0.021	2.6887	162.839
ASP_243@OD1	LYS_261@HZ2	LYS_261@NZ	99790	0.021	2.7943	156.295
LEU_511@O	LYS_513@H	LYS_513@N	99713	0.021	2.8387	147.145
GLU_135@OE2	ARG_134@HH12	ARG_134@NH1	99628	0.021	2.7843	154.853
GLN_173@O	GLN_173@HE22	GLN_173@NE2	99602	0.021	2.8789	150.087
ASP_92@OD1	LYS_283@HZ3	LYS_283@NZ	99583	0.021	2.8092	154.018
ASP_92@OD1	LYS_2@H	LYS_2@N	99561	0.021	2.8167	161.243
ASN_436@OD1	GLN_432@HE22	GLN_432@NE2	99561	0.021	2.8523	152.346
GLU_416@OE2	ARG_428@HH12	ARG_428@NH1	99393	0.0209	2.8004	158.469
GLU_133@OE1	ARG_134@HE	ARG_134@NE	99389	0.0209	2.8082	157.447
GLN_481@O	ASN_485@HD22	ASN_485@ND2	99349	0.0209	2.8438	159.038
ASP_92@OD1	SER_249@HG	SER_249@OG	99294	0.0209	2.6832	163.152
ASP_243@OD1	LYS_261@HZ3	LYS_261@NZ	99247	0.0209	2.7936	156.362
ALA_117@O	LYS_211@HZ2	LYS_211@NZ	99207	0.0209	2.8173	151.786
ALA_117@O	LYS_211@HZ1	LYS_211@NZ	99160	0.0209	2.8176	151.752
ASP_334@OD1	ARG_67@HH21	ARG_67@NH2	98937	0.0208	2.7801	155.782
ALA_516@O	ARG_214@HE	ARG_214@NE	98919	0.0208	2.8381	156.175
ARG_385@O	GLN_389@HE22	GLN_389@NE2	98895	0.0208	2.8578	160.093
SER_77@O	SER_79@H	SER_79@N	98881	0.0208	2.8653	146.41
ASP_212@OD1	LYS_210@HZ1	LYS_210@NZ	98864	0.0208	2.796	158.608
GLY_68@O	GLY_70@H	GLY_70@N	98805	0.0208	2.8556	146.477
SER_3@O	TYR_11@HH	TYR_11@OH	98782	0.0208	2.7346	161.255
PRO_251@O	VAL_255@H	VAL_255@N	98604	0.0208	2.892	158.22
ASP_243@OD1	LYS_261@HZ1	LYS_261@NZ	98576	0.0208	2.7943	156.356
ASP_342@OD2	ARG_19@HH21	ARG_19@NH2	98529	0.0207	2.785	159.142
ASN_335@OD1	SER_79@HG	SER_79@OG	98499	0.0207	2.744	160.775
ASP_86@OD1	LYS_319@HZ1	LYS_319@NZ	98039	0.0206	2.7831	158.439
ALA_117@O	LYS_211@HZ3	LYS_211@NZ	98016	0.0206	2.8173	151.747
ASN_420@OD1	GLN_100@HE22	GLN_100@NE2	97898	0.0206	2.8614	161.314
ASP_334@OD2	ARG_67@HH21	ARG_67@NH2	97847	0.0206	2.7759	157.359
ASN_76@OD1	THR_341@HG1	THR_341@OG1	97642	0.0206	2.7612	160.552
ASP_83@OD2	SER_84@HG	SER_84@OG	97610	0.0205	2.7226	162.598
GLU_111@OE2	ARG_214@HH21	ARG_214@NH2	97583	0.0205	2.8029	153.493
GLU_58@OE1	ARG_66@H	ARG_66@N	97573	0.0205	2.8815	164.651
VAL_348@O	TRP_440@HE1	TRP_440@NE1	97560	0.0205	2.8518	159.123
ASN_76@OD1	SER_79@H	SER_79@N	97387	0.0205	2.8809	151.847
GLN_183@OE1	GLN_267@HE22	GLN_267@NE2	97075	0.0204	2.8442	159.891
ASP_459@OD1	ARG_489@HH12	ARG_489@NH1	96948	0.0204	2.7639	157.208
ASP_515@OD2	ARG_473@HH21	ARG_473@NH2	96814	0.0204	2.8059	155.15
SER_144@OG	ML1_259@H6	ML1_259@O2	96803	0.0204	2.8288	150.844
ASP_239@OD2	THR_264@HG1	THR_264@OG1	96756	0.0204	2.6965	162.22
GLU_133@O	LEU_136@H	LEU_136@N	96616	0.0203	2.9026	150.838
ASP_243@OD2	LYS_261@HZ2	LYS_261@NZ	96530	0.0203	2.7937	156.313
GLN_170@O	GLN_170@HE22	GLN_170@NE2	96522	0.0203	2.8765	151.143
ASN_226@OD1	GLN_222@HE21	GLN_222@NE2	96139	0.0202	2.8574	155.013
ASP_512@O	GLN_481@HE22	GLN_481@NE2	96088	0.0202	2.8509	161.146
GLU_157@OE1	ARG_169@HH12	ARG_169@NH1	96030	0.0202	2.8064	157.166
GLN_170@OE1	ASN_340@HD22	ASN_340@ND2	95896	0.0202	2.8342	160.304
ASN_335@O	GLN_339@H	GLN_339@N	95878	0.0202	2.8955	156.865
ASP_243@OD2	LYS_261@HZ3	LYS_261@NZ	95876	0.0202	2.794	156.329
PRO_510@O	ASP_515@H	ASP_515@N	95511	0.0201	2.8777	159.686
ASP_239@OD1	THR_264@HG1	THR_264@OG1	95484	0.0201	2.6966	162.336
PRO_510@O	GLN_359@HE21	GLN_359@NE2	95256	0.0201	2.8445	153.664
ASP_334@OD1	THR_82@HG1	THR_82@OG1	95193	0.02	2.7243	161.512
ILE_204@O	ALA_207@H	ALA_207@N	95072	0.02	2.9062	142.621
ASP_459@OD2	ARG_489@HH22	ARG_489@NH2	95010	0.02	2.8519	152.489
ARG_66@O	GLY_68@H	GLY_68@N	94738	0.0199	2.8407	147.667
GLY_320@O	SER_338@H	SER_338@N	94721	0.0199	2.9013	155.939
ASP_334@OD2	ARG_66@HH12	ARG_66@NH1	94660	0.0199	2.8187	155.616
ASP_342@OD2	LYS_60@HZ1	LYS_60@NZ	94634	0.0199	2.7487	159.4
TRP_181@O	TYR_245@HH	TYR_245@OH	94588	0.0199	2.8331	158.929
ASN_76@OD1	SER_338@H	SER_338@N	94554	0.0199	2.8704	158.857
ASN_81@O	ASN_81@HD22	ASN_81@ND2	94512	0.0199	2.8151	145.178
ASP_189@OD2	SER_143@HG	SER_143@OG	94383	0.0199	2.6754	163.229
GLU_435@OE1	ARG_434@HH11	ARG_434@NH1	94375	0.0199	2.7765	154.602
ILE_18@O	LEU_21@H	LEU_21@N	94263	0.0198	2.8893	142.975
GLU_58@OE1	ARG_66@HH12	ARG_66@NH1	94247	0.0198	2.7948	157.934
ASP_497@OD2	ILE_499@H	ILE_499@N	94199	0.0198	2.8943	163.892
GLU_404@OE2	LYS_60@HZ1	LYS_60@NZ	94197	0.0198	2.7939	156.694
GLU_404@OE2	LYS_60@HZ2	LYS_60@NZ	94176	0.0198	2.7933	156.838
VAL_14@O	MET_17@H	MET_17@N	94115	0.0198	2.8903	142.386
SER_186@O	LYS_261@HZ3	LYS_261@NZ	93692	0.0197	2.8019	154.096
GLU_176@OE2	ARG_175@HE	ARG_175@NE	93639	0.0197	2.8358	150.96
ALA_263@O	GLN_271@HE21	GLN_271@NE2	93474	0.0197	2.8467	159.525
ILE_463@O	ALA_466@H	ALA_466@N	93349	0.0197	2.9062	142.779
ASN_347@OD1	ASN_350@H	ASN_350@N	93344	0.0197	2.8684	158.016
ASP_243@OD2	LYS_261@HZ1	LYS_261@NZ	93342	0.0197	2.7942	156.22
THR_82@OG1	ASN_340@HD22	ASN_340@ND2	93301	0.0196	2.8668	158.057
ASP_190@OD2	ARG_230@HH12	ARG_230@NH1	93298	0.0196	2.8402	157.495
ASP_342@OD2	LYS_60@HZ2	LYS_60@NZ	93208	0.0196	2.7486	159.478
ASP_342@OD1	SER_343@H	SER_343@N	93208	0.0196	2.8391	145.515
ASP_243@OD1	GLN_267@H	GLN_267@N	93126	0.0196	2.8238	161.06
GLN_432@OE1	ASN_81@HD21	ASN_81@ND2	93054	0.0196	2.853	153.312
ASN_420@O	LEU_423@H	LEU_423@N	92870	0.0196	2.9072	148.968
ASP_448@OD2	MET_1@H2	MET_1@N	92798	0.0195	2.793	149.744
GLU_52@OE2	ARG_51@HH21	ARG_51@NH2	92795	0.0195	2.8026	154.33
GLN_386@OE1	GLN_389@HE22	GLN_389@NE2	92610	0.0195	2.8471	156.935
GLU_111@OE2	ALA_516@H	ALA_516@N	92582	0.0195	2.867	163.684
ASP_212@OD1	LYS_210@HZ3	LYS_210@NZ	92568	0.0195	2.7958	158.518
ASP_212@OD1	LYS_210@HZ2	LYS_210@NZ	92453	0.0195	2.7963	158.522
GLU_425@OE1	ASN_91@HD22	ASN_91@ND2	92387	0.0194	2.8013	162.938
ALA_328@O	ARG_291@HH12	ARG_291@NH1	92306	0.0194	2.8255	154.469
ASP_448@OD2	MET_1@H3	MET_1@N	92245	0.0194	2.7909	149.806
GLN_150@OE1	GLN_150@H	GLN_150@N	92082	0.0194	2.8346	147.437
SER_77@OG	SER_338@HG	SER_338@OG	92073	0.0194	2.7911	159.211
GLU_404@OE1	LYS_60@HZ3	LYS_60@NZ	92070	0.0194	2.7918	156.653
HIE_444@ND1	TYR_504@HH	TYR_504@OH	92031	0.0194	2.8552	159.159
PRO_288@O	TYR_331@HH	TYR_331@OH	91820	0.0193	2.7458	160.446
GLU_157@OE1	ARG_169@HH22	ARG_169@NH2	91683	0.0193	2.8196	153.913
SER_186@O	LYS_261@HZ1	LYS_261@NZ	91640	0.0193	2.8023	154.112
ASP_75@OD1	TYR_72@HH	TYR_72@OH	91572	0.0193	2.7252	163.737
SER_186@O	LYS_261@HZ2	LYS_261@NZ	91386	0.0192	2.8026	154.034
THR_82@O	SER_338@HG	SER_338@OG	91336	0.0192	2.7366	157.73
ALA_257@OXT	ARG_378@HH21	ARG_378@NH2	91272	0.0192	2.8051	155.753
GLU_233@OE2	ASN_236@HD22	ASN_236@ND2	91272	0.0192	2.8413	160.84
ASP_471@OD1	LYS_469@HZ2	LYS_469@NZ	91039	0.0192	2.7969	158.557
GLU_233@OE1	ASN_236@HD22	ASN_236@ND2	90916	0.0191	2.8416	160.815
PRO_285@O	ASN_335@HD21	ASN_335@ND2	90880	0.0191	2.849	154.328
GLU_323@OE1	ARG_326@HE	ARG_326@NE	90666	0.0191	2.8136	153.922
GLN_127@O	GLN_130@H	GLN_130@N	90636	0.0191	2.9075	148.957
THR_5@O	GLN_8@H	GLN_8@N	90361	0.019	2.8992	156.823
ASP_212@OD2	LYS_210@HZ1	LYS_210@NZ	90300	0.019	2.7972	158.551
GLN_429@O	GLN_432@H	GLN_432@N	90246	0.019	2.8981	142.922
THR_341@OG1	THR_82@HG1	THR_82@OG1	89882	0.0189	2.7582	160.5
SER_6@O	THR_46@H	THR_46@N	89791	0.0189	2.8523	160.6
GLU_64@OE2	ARG_32@HH22	ARG_32@NH2	89724	0.0189	2.7932	160.091
SER_262@OG	THR_264@HG1	THR_264@OG1	89691	0.0189	2.821	160.436
ASP_471@OD2	LYS_469@HZ2	LYS_469@NZ	89650	0.0189	2.7962	158.547
ASP_238@OD1	LYS_261@H	LYS_261@N	89644	0.0189	2.8331	158.063
GLU_404@OE1	LYS_60@HZ2	LYS_60@NZ	89560	0.0189	2.7915	156.65
ASP_212@OD2	LYS_210@HZ3	LYS_210@NZ	89332	0.0188	2.7972	158.491
ASP_498@O	PHE_501@H	PHE_501@N	89320	0.0188	2.901	147.723
ASP_342@OD2	SER_343@H	SER_343@N	89261	0.0188	2.8393	145.497
ASP_243@OD2	LYS_261@H	LYS_261@N	89182	0.0188	2.8179	154.644
ASP_471@OD1	LYS_469@HZ3	LYS_469@NZ	89138	0.0188	2.7965	158.482
CYS_349@O	ASN_437@HD22	ASN_437@ND2	89055	0.0187	2.8442	156.916
GLU_13@OE1	GLN_442@HE21	GLN_442@NE2	89000	0.0187	2.836	159.965
GLU_157@OE2	ARG_169@HH12	ARG_169@NH1	88844	0.0187	2.8068	157.42
ASP_471@OD2	LYS_469@HZ1	LYS_469@NZ	88839	0.0187	2.797	158.563
TYR_500@OH	HIE_446@HE2	HIE_446@NE2	88756	0.0187	2.8931	154.052
ASP_471@OD1	LYS_469@HZ1	LYS_469@NZ	88747	0.0187	2.7973	158.505
ASP_497@OD1	ILE_499@H	ILE_499@N	88716	0.0187	2.8981	163.862
GLU_135@OE2	SER_144@HG	SER_144@OG	88704	0.0187	2.6756	164.176
GLN_339@OE1	GLN_170@HE21	GLN_170@NE2	88673	0.0187	2.8555	160.67
ASP_471@OD2	LYS_469@HZ3	LYS_469@NZ	88622	0.0187	2.7963	158.599
ASP_515@OD2	ARG_473@HE	ARG_473@NE	88462	0.0186	2.8291	156.008
THR_418@OG1	ASN_420@HD22	ASN_420@ND2	88419	0.0186	2.8809	155.426
ASP_212@OD2	LYS_210@HZ2	LYS_210@NZ	88384	0.0186	2.7969	158.438
ASP_471@OD2	ARG_473@HH21	ARG_473@NH2	88229	0.0186	2.8072	159.539
ASP_345@OD1	ARG_19@HH21	ARG_19@NH2	88140	0.0186	2.7859	155.903
GLU_455@OE2	LYS_454@HZ1	LYS_454@NZ	88039	0.0185	2.7754	157.352
ASP_448@O	ARG_453@HH22	ARG_453@NH2	88031	0.0185	2.8283	152.713
GLU_455@OE1	LYS_454@HZ2	LYS_454@NZ	87852	0.0185	2.7749	157.285
GLU_455@OE2	LYS_454@HZ3	LYS_454@NZ	87751	0.0185	2.7751	157.338
SER_494@O	ASP_497@H	ASP_497@N	87702	0.0185	2.917	162.211
ASP_86@OD2	ARG_278@HE	ARG_278@NE	87665	0.0185	2.8309	152.828
SER_143@OG	ARG_134@HH22	ARG_134@NH2	87579	0.0184	2.8447	156.894
GLU_455@OE1	LYS_454@HZ1	LYS_454@NZ	87540	0.0184	2.7753	157.305
GLU_295@OE2	ARG_306@HH11	ARG_306@NH1	87363	0.0184	2.7914	158.529
GLY_503@O	GLN_359@HE21	GLN_359@NE2	87136	0.0183	2.8643	153.982
ASP_342@OD2	LYS_60@HZ3	LYS_60@NZ	87118	0.0183	2.7485	159.445
ASP_342@OD2	THR_341@HG1	THR_341@OG1	87092	0.0183	2.709	161.678
GLU_111@OE1	ALA_516@H	ALA_516@N	86888	0.0183	2.8669	163.796
GLU_435@OE2	GLN_8@HE22	GLN_8@NE2	86821	0.0183	2.8319	161.729
ASP_256@O	GLN_375@HE22	GLN_375@NE2	86452	0.0182	2.8464	161.304
GLU_166@OE2	ARG_169@HH12	ARG_169@NH1	86407	0.0182	2.7988	157.244
GLU_404@OE1	LYS_60@HZ1	LYS_60@NZ	86194	0.0181	2.7927	156.488
SER_262@OG	THR_264@H	THR_264@N	85977	0.0181	2.9157	155.12
GLU_13@OE2	SER_3@HG	SER_3@OG	85849	0.0181	2.6754	163.359
SER_143@O	SER_146@H	SER_146@N	85768	0.0181	2.8969	151.407
ASP_83@OD1	SER_84@HG	SER_84@OG	85706	0.018	2.7227	162.376
ALA_87@O	ALA_93@H	ALA_93@N	85656	0.018	2.8982	160.782
VAL_332@O	ARG_67@HH12	ARG_67@NH1	85573	0.018	2.814	151.605
ASP_86@OD1	ARG_278@HE	ARG_278@NE	85557	0.018	2.8361	151.98
SER_336@O	ASN_76@HD22	ASN_76@ND2	85550	0.018	2.8516	160.247
MET_384@O	ALA_387@H	ALA_387@N	85470	0.018	2.9037	143.93
ASP_448@OD2	ASP_449@H	ASP_449@N	85464	0.018	2.8435	143.684
GLU_455@OE2	LYS_454@HZ2	LYS_454@NZ	85251	0.0179	2.775	157.355
GLU_52@OE1	ARG_51@HH21	ARG_51@NH2	85062	0.0179	2.8046	154.713
GLU_455@OE1	LYS_454@HZ3	LYS_454@NZ	85061	0.0179	2.7744	157.288
ASP_345@OD2	ASN_437@HD21	ASN_437@ND2	85060	0.0179	2.8495	161.444
GLU_157@OE2	ARG_169@HH22	ARG_169@NH2	84957	0.0179	2.8206	154.017
LYS_513@O	ASP_515@H	ASP_515@N	84952	0.0179	2.8272	147.808
ASP_515@OD1	ASN_367@HD21	ASN_367@ND2	84825	0.0179	2.836	161.614
ASP_200@OD2	GLN_222@HE22	GLN_222@NE2	84789	0.0179	2.8312	161.832
ALA_207@O	LYS_211@H	LYS_211@N	84752	0.0178	2.8519	141.692
ASP_380@OD1	LYS_254@HZ3	LYS_254@NZ	84677	0.0178	2.7938	156.491
ASP_256@OD2	GLN_100@HE21	GLN_100@NE2	84652	0.0178	2.8288	162.674
LYS_261@O	THR_264@HG1	THR_264@OG1	84564	0.0178	2.7386	159.28
GLU_13@OE2	GLN_442@HE21	GLN_442@NE2	84536	0.0178	2.8371	160.141
GLU_455@OE2	ARG_489@HE	ARG_489@NE	84517	0.0178	2.8268	156.201
ALA_266@O	ARG_268@HH11	ARG_268@NH1	84513	0.0178	2.8389	155.288
ASP_243@OD1	ARG_268@H	ARG_268@N	84505	0.0178	2.837	160.948
ASP_253@O	VAL_255@H	VAL_255@N	84501	0.0178	2.8589	147.746
GLU_323@O	ARG_326@HH11	ARG_326@NH1	84481	0.0178	2.826	152.108
ILE_182@O	HIE_185@H	HIE_185@N	84337	0.0178	2.8906	145.688
LEU_443@O	TYR_500@HH	TYR_500@OH	84334	0.0178	2.7937	160.84
ALA_387@O	LEU_390@H	LEU_390@N	84059	0.0177	2.9152	151.771
CYS_349@O	ASP_351@H	ASP_351@N	84046	0.0177	2.884	147.453
GLU_111@OE1	ARG_214@HE	ARG_214@NE	83932	0.0177	2.8217	153.448
GLU_272@OE1	ARG_268@HH11	ARG_268@NH1	83919	0.0177	2.7836	159.379
VAL_273@O	MET_276@H	MET_276@N	83883	0.0177	2.889	142.198
ASP_515@OD1	ARG_473@HE	ARG_473@NE	83834	0.0176	2.8287	155.811
SER_138@OG	ALA_140@H	ALA_140@N	83812	0.0176	2.9151	157.209
SER_265@O	SER_186@HG	SER_186@OG	83807	0.0176	2.7057	161.875
ASP_448@OD1	ARG_453@HH12	ARG_453@NH1	83663	0.0176	2.7984	156.841
GLN_432@OE1	ARG_19@HH22	ARG_19@NH2	83574	0.0176	2.8338	152.105
ALA_257@OXT	GLN_100@HE22	GLN_100@NE2	83524	0.0176	2.8031	162.735
ASP_20@O	ILE_23@H	ILE_23@N	83441	0.0176	2.8973	145.776
ASP_334@OD1	ARG_67@HE	ARG_67@NE	83435	0.0176	2.8395	153.017
GLU_135@OE1	GLU_135@H	GLU_135@N	83347	0.0175	2.8295	150.907
GLU_392@O	LEU_395@H	LEU_395@N	83306	0.0175	2.9148	153.2
ASP_448@O	ARG_453@HH11	ARG_453@NH1	83304	0.0175	2.8152	149.904
GLU_435@OE2	ARG_434@HH11	ARG_434@NH1	83173	0.0175	2.7759	154.382
ASP_342@OD1	LYS_60@HZ1	LYS_60@NZ	83111	0.0175	2.7743	159.093
ASP_342@OD1	LYS_60@HZ3	LYS_60@NZ	83025	0.0175	2.7746	159.071
SER_3@O	SER_6@H	SER_6@N	83003	0.0175	2.8943	154.832
GLU_145@OE1	ARG_175@HH22	ARG_175@NH2	82969	0.0175	2.8028	155.926
GLU_435@OE2	GLN_12@HE22	GLN_12@NE2	82910	0.0175	2.8132	158.877
ASP_345@OD1	ASN_81@HD21	ASN_81@ND2	82786	0.0174	2.8376	160.89
VAL_332@O	ASN_335@H	ASN_335@N	82502	0.0174	2.905	152.495
LEU_131@O	ARG_134@HE	ARG_134@NE	82376	0.0173	2.8491	152.346
GLU_435@OE1	GLN_8@HE22	GLN_8@NE2	82358	0.0173	2.8325	161.654
GLN_130@OE1	ARG_134@HH21	ARG_134@NH2	82327	0.0173	2.8116	154.732
ASP_189@OD1	SER_265@HG	SER_265@OG	82049	0.0173	2.6897	162.636
GLU_455@OE1	ARG_489@HE	ARG_489@NE	82024	0.0173	2.8269	156.292
LEU_153@O	ALA_156@H	ALA_156@N	81989	0.0173	2.8864	141.48
GLU_394@O	ALA_399@H	ALA_399@N	81928	0.0172	2.8907	160.635
SER_397@O	SER_398@HG	SER_398@OG	81904	0.0172	2.7168	156.403
ASP_256@OD1	GLN_100@HE21	GLN_100@NE2	81743	0.0172	2.8287	162.361
GLU_370@OE1	ARG_473@HH21	ARG_473@NH2	81585	0.0172	2.7999	154.784
GLU_135@OE2	GLU_135@H	GLU_135@N	81386	0.0171	2.8269	151.022
ASP_75@OD1	ASN_76@HD22	ASN_76@ND2	81333	0.0171	2.8331	157.863
ALA_466@O	LYS_470@H	LYS_470@N	81292	0.0171	2.8524	141.719
ML1_259@O7	ARG_102@HH22	ARG_102@NH2	81218	0.0171	2.9124	143.752
GLU_370@OE2	ARG_473@HH21	ARG_473@NH2	81093	0.0171	2.7997	154.531
GLU_356@OE1	ASN_161@HD22	ASN_161@ND2	80773	0.017	2.7676	156.907
ALA_257@O	GLN_375@HE22	GLN_375@NE2	80714	0.017	2.8223	162.93
SER_397@O	ALA_399@H	ALA_399@N	80689	0.017	2.8423	146.661
ASP_92@OD2	LYS_261@HZ2	LYS_261@NZ	80644	0.017	2.7972	155.984
ASP_92@OD2	LYS_261@HZ1	LYS_261@NZ	80601	0.017	2.7974	156.08
ASP_92@OD2	LYS_261@HZ3	LYS_261@NZ	80577	0.017	2.7976	155.966
LYS_261@O	SER_265@H	SER_265@N	80564	0.017	2.8664	156.014
ASP_189@OD2	ML1_259@H6	ML1_259@O2	80498	0.0169	2.6851	162.812
GLY_78@O	THR_82@HG1	THR_82@OG1	80434	0.0169	2.748	160.766
[truncated: 16,245 more rows]
